# Supplementary material
Source: publisher site journal article supplement (https://www.spandidos-publications.com/2948/downloadSupplementary)
Supplement: Supplementary file 1 [file downloadSupplementary]

## Sheet: Table S3 GO-Biological_Process
Table SIV. GO-Biological Process
GOBPID	Term	Sample number	Background number	Pvalue	corrPvalue	GeneIDs	GeneNames
GO:0006952	defense response	115	756	6.00773e-13	3.01889e-09	64647;24498;113901;84387;502852;24493;24310;245920;361422;24392;289237;24795;301229;295934;29290;498840;498335;291100;66015;60350;311374;24383;50672;29687;83781;24464;100365043;499926;64389;367166;362634;25728;170897;25054;641624;117254;116637;246074;688090;100911545;60582;100124593;79129;81743;24770;56822;89824;24807;680312;25732;171569;81511;114105;298566;24367;287526;288001;679787;66021;292060…	Hist1h2bl;Il6;Chia;Pglyrp1;Cd207;Il1a;Ace;Cxcl10;Cotl1;Gja1;Slamf8;Serpina3n;Trem1;Chst1;Adora1;Tmem173;Cxcl13;Irf4;Adamts4;Cd14;Duoxa1;Gapdh;Ednrb;C1qb;Lgals3;Hp;LOC100365043;Bpifb1;Defb4;Hyal1;C1qc;Apoe;Sphk1;Ntrk2;Defb5;Prdx1;Ccl4;Scd1;RT1-Bb;LOC100911545;Il1rn;Cxcr6;Cyba;Pde2a;Ccl2;Cd86;Chi3l1;Tacr1;Hist1h2bk;Acp5;Spon2;Lat;Cxcl2;C1qa;Fgg;Serpinf1;Kng1l1;Clec5a;Cybb;Irf8;Mmp7;Cfb;Prcp;Il2ra;S…
GO:0006954	inflammatory response	71	374	2.8343e-12	7.12119e-09	362076;367166;24807;25728;170897;290326;25054;293118;25704;24498;25544;116637;25732;84387;289211;24232;24493;58949;59103;24237;245920;100911545;60582;24392;24464;100124593;114105;311374;79129;24614;24795;24770;295934;113901;81743;29290;24310;24599;24451;64546;305236;687536;89824;305355;113959;81503;25651;117029;25542;288001;81511;29427;304815;60350;25316;25572;83504;287562;50672;287561;24367;2957…	Il36b;Hyal1;Tacr1;Apoe;Sphk1;Pbk;Ntrk2;Prcp;Il2ra;Il6;Sele;Ccl4;Acp5;Pglyrp1;Fcgr2b;C3;Il1a;Ptafr;Ptges;C6;Cxcl10;LOC100911545;Il1rn;Gja1;Hp;Cxcr6;Cxcl2;Duoxa1;Cyba;Orm1;Serpina3n;Ccl2;Chst1;Chia;Pde2a;Adora1;Ace;Nos2;Hmox1;Il12b;Cxcl11;Foxf1;Chi3l1;Tlr10;C5ar1;Cxcl1;Selp;Ccr5;Ccl3;Kng1l1;Lat;Aif1;Elf3;Cd14;Ms4a2;Tnfrsf4;Kl;Ccl12;Ednrb;Ccl7;Fgg;Serping1;Serpinf1;Cxcl6;Adra2a;Serpina1;Cspg4;Cybb;M…
GO:0006955	immune response	104	686	8.63754e-12	1.44679e-08	499342;317676;100910200;24498;679975;84387;24493;245920;24795;301229;304988;29610;84492;498840;498335;117551;301066;291100;24988;60350;361537;24383;29687;83781;81639;100365043;499926;114203;362634;361689;24832;117254;116637;688090;100911545;60582;81503;84032;79129;306748;24770;56822;294269;680312;25046;171569;81511;114105;298566;365183;360918;679787;66021;292060;25335;294257;25704;25542;25350;254…	Cd274;Lat2;LOC100910200;Il6;Gpr183;Pglyrp1;Il1a;Cxcl10;Serpina3n;Trem1;Mnda;Tgfbr3;Tec;Tmem173;Cxcl13;Ccl22;Ccr8;Irf4;RT1-M2;Cd14;Tyrobp;Gapdh;C1qb;Lgals3;Alox15;LOC100365043;Bpifb1;Sh2b2;C1qc;Unc93b1;Thy1;Prdx1;Ccl4;RT1-Bb;LOC100911545;Il1rn;Cxcl1;Col3a1;Cyba;Cxcl14;Ccl2;Cd86;RT1-Da;Hist1h2bk;Pigr;Spon2;Lat;Cxcl2;C1qa;Fcar;Pf4;Clec5a;Cybb;Irf8;Mmp7;Cfb;Il2ra;Ccl3;Sftpd;Ctsh;Tnfsf9;Orm1;Serping1;…
GO:0033993	response to lipid	111	803	2.42354e-10	3.04457e-07	29597;89813;24498;315215;24493;24310;245920;24795;29610;83731;89804;58966;65161;191575;25453;29200;24787;60350;50672;83783;29687;24464;292301;25350;25728;170897;24834;64041;83791;24571;100911545;25375;60582;81503;117099;29637;25033;360228;24770;24773;25425;171112;24479;50592;56822;116680;25732;24807;171569;29221;114105;448830;287526;29143;29437;308100;170568;292060;294257;24950;24212;25542;24890;…	P2ry2;Pdk4;Il6;Mlc1;Il1a;Ace;Cxcl10;Serpina3n;Tgfbr3;Kcnma1;Tek;Ramp2;Litaf;Nme1;Gdnf;Inhba;Sod2;Cd14;Ednrb;Sult1a1;C1qb;Hp;T;Sftpd;Apoe;Sphk1;Tk1;Birc5;Fdps;Muc1;LOC100911545;Aldh3a1;Il1rn;Cxcl1;Bdh1;Hmgcs1;Sstr1;Wfdc21;Ccl2;Sftpa1;Ctsh;Wfdc1;Idh1;Gria1;Cd86;Ptpru;Acp5;Tacr1;Spon2;Arg1;Cxcl2;Ly96;Serpinf1;Grn;Acta1;Acat2;Dmbt1;Irf8;Cfb;Srd5a1;Atp1a2;Ccl3;Esr1;Abcb4;C3;Mmp9;Gjb6;Acer2;Orm1;Aif1;N…
GO:0010033	response to organic substance	209	1910	1.9296e-09	1.93925e-06	29597;85497;81819;89813;367166;24498;315215;24493;310621;245920;24392;24795;81869;304988;29610;83731;498840;498335;89804;294257;301066;58966;314386;191573;301086;65161;191575;25453;29200;24787;24953;60350;25694;266684;50676;24383;50672;50671;83783;29687;89784;81639;24464;25589;292301;366949;498638;114203;685243;300691;24807;25728;170897;24834;25054;54237;25425;64041;83791;688090;24571;287129;2916…	P2ry2;Klf15;Pax8;Pdk4;Hyal1;Il6;Mlc1;Il1a;Iqgap3;Cxcl10;Gja1;Serpina3n;Gstm7;Mnda;Tgfbr3;Kcnma1;Tmem173;Cxcl13;Tek;Cfb;Ccr8;Ramp2;Gpr68;Grin3a;Xcr1;Litaf;Nme1;Gdnf;Inhba;Sod2;Gcgr;Cd14;Has2;Cyp2d1;Slc6a12;Gapdh;Ednrb;Fasn;Sult1a1;C1qb;Idi1;Alox15;Hp;Kdr;T;Mafa;Msr1;Sh2b2;Ackr4;Nnmt;Tacr1;Apoe;Sphk1;Tk1;Ntrk2;Cdk1;Ctsh;Birc5;Fdps;RT1-Bb;Muc1;Tmem204;Mzb1;LOC100911545;Aldh3a1;Il1rn;Plvap;Cxcr6;Col3…
GO:0034097	response to cytokine	69	442	8.4568e-09	7.00061e-06	29597;685243;25728;170897;114203;25054;25704;24498;25544;499204;497672;25542;81680;688090;59103;81687;245920;24493;60582;56822;367166;100124593;84032;79129;24795;304988;81743;116510;29427;24773;170496;24599;29393;64546;305236;301066;117022;56765;29168;89824;360228;687536;25732;117029;25557;301227;24770;29221;60350;114105;25694;25572;113976;117038;24383;83516;301086;50671;24366;29244;266807;64041;…	P2ry2;Ackr4;Apoe;Sphk1;Sh2b2;Ntrk2;Il2ra;Il6;Sele;Ddias;Brca1;Ccl3;Lifr;RT1-Bb;Ptges;Mmp9;Cxcl10;Il1a;Il1rn;Cd86;Hyal1;Cxcr6;Col3a1;Cyba;Serpina3n;Mnda;Pde2a;Timp1;Aif1;Sftpa1;Lcn2;Nos2;Col1a1;Il12b;Cxcl11;Ccr8;Il1r2;Plvap;Ubd;Chi3l1;Wfdc21;Foxf1;Acp5;Ccr5;Star;Trem2;Ccl2;Arg1;Cd14;Cxcl2;Has2;Tnfrsf4;Acsl4;Mt3;Gapdh;Ppargc1a;Xcr1;Fasn;Fgb;Gch1;Duox1;Birc5;Pf4;Alox15;Serpina1;Sox9;Trim63;Mt2A;Tmem…
GO:0002376	immune system process	159	1386	9.75209e-09	7.00061e-06	499342;317676;100910200;24498;113901;84387;502852;24493;100912290;24310;245920;353250;286896;303801;24795;301229;304988;29610;29290;84492;498840;498335;89804;301066;314386;291100;191575;312705;24787;100360950;60350;361537;24383;50672;679975;29687;287818;29452;81639;24464;100365043;25589;499926;83781;309304;114203;362634;361689;501854;297666;24832;117254;364754;116637;24988;688090;291675;100911545…	Cd274;Lat2;LOC100910200;Il6;Chia;Pglyrp1;Cd207;Il1a;LOC100912290;Ace;Cxcl10;Niacr1;Sgpl1;Lamp3;Serpina3n;Trem1;Mnda;Tgfbr3;Adora1;Tec;Tmem173;Cxcl13;Tek;Ccr8;Gpr68;Irf4;Nme1;C1r;Sod2;LOC100360950;Cd14;Tyrobp;Gapdh;Ednrb;Gpr183;C1qb;Cd300lf;Epas1;Alox15;Hp;LOC100365043;Kdr;Bpifb1;Lgals3;Pdcd1lg2;Sh2b2;C1qc;Unc93b1;Rab7b;Klra5;Thy1;Prdx1;Fzd8;Ccl4;RT1-M2;RT1-Bb;Mzb1;LOC100911545;Il1rn;Plvap;Lpxn;Co…
GO:0070887	cellular response to chemical stimulus	171	1525	1.17539e-08	7.3829e-06	29597;85497;81819;89813;24498;315215;24493;310621;245920;289237;24795;81869;304988;29610;84007;498840;498335;305253;301066;58966;314386;301086;65161;288589;362510;191575;25453;29200;24787;24953;60350;25694;117038;24383;50672;50671;83783;83781;29452;81639;24464;25589;292301;498638;114203;685243;25524;25728;170897;25054;54237;25425;117254;116637;83791;688090;287562;24571;287129;291675;60582;56765;1…	P2ry2;Klf15;Pax8;Pdk4;Il6;Mlc1;Il1a;Iqgap3;Cxcl10;Slamf8;Serpina3n;Gstm7;Mnda;Tgfbr3;C3ar1;Tmem173;Cxcl13;Adamts3;Ccr8;Ramp2;Gpr68;Xcr1;Litaf;Rasa4;Melk;Nme1;Gdnf;Inhba;Sod2;Gcgr;Cd14;Has2;Mt3;Gapdh;Ednrb;Fasn;Sult1a1;Lgals3;Epas1;Alox15;Hp;Kdr;T;Msr1;Sh2b2;Ackr4;Psap;Apoe;Sphk1;Ntrk2;Cdk1;Ctsh;Prdx1;Ccl4;Fdps;RT1-Bb;Ccl12;Muc1;Tmem204;Mzb1;Il1rn;Plvap;Cxcr6;Col3a1;Cyba;Cxcl14;Hmgcs1;Pde2a;Fam20c…
GO:0071345	cellular response to cytokine stimulus	56	335	2.65442e-08	1.37697e-05	29597;685243;25728;170897;114203;25054;25704;24498;499204;497672;25542;81680;688090;81687;245920;24493;60582;56822;100124593;79129;24795;304988;81743;29427;170496;24599;29393;64546;305236;301066;117022;56765;89824;687536;117029;25557;301227;24770;29221;114105;25694;25572;117038;24383;83516;301086;50671;24366;266807;64041;360918;81639;367166;140586;689415;498840	P2ry2;Ackr4;Apoe;Sphk1;Sh2b2;Ntrk2;Il2ra;Il6;Ddias;Brca1;Ccl3;Lifr;RT1-Bb;Mmp9;Cxcl10;Il1a;Il1rn;Cd86;Cxcr6;Cyba;Serpina3n;Mnda;Pde2a;Aif1;Lcn2;Nos2;Col1a1;Il12b;Cxcl11;Ccr8;Il1r2;Plvap;Chi3l1;Foxf1;Ccr5;Star;Trem2;Ccl2;Arg1;Cxcl2;Has2;Tnfrsf4;Mt3;Gapdh;Ppargc1a;Xcr1;Fasn;Fgb;Duox1;Birc5;Pf4;Alox15;Hyal1;Sox9;Mt2A;Tmem173
GO:0009617	response to bacterium	65	419	2.74024e-08	1.37697e-05	29597;292060;84403;25335;64647;294257;171569;641624;24498;60665;25732;84387;246074;24493;58949;59103;364018;81687;245920;310395;60582;24464;81503;100910200;24795;301229;24614;24770;24773;170496;24599;113959;64546;287610;361247;56822;360228;65161;25651;117029;66015;25542;25557;301227;289211;24310;29221;60350;114105;24482;25256;24787;50672;448830;680312;29244;289237;114097;24648;100365043;688047;49…	P2ry2;Irf8;Gjb6;Mmp7;Hist1h2bl;Cfb;Spon2;Defb5;Il6;Cxcl6;Acp5;Pglyrp1;Scd1;Il1a;Ptafr;Ptges;Ncf2;Mmp9;Cxcl10;Ccr4;Il1rn;Hp;Cxcl1;LOC100910200;Serpina3n;Trem1;Orm1;Ccl2;Sftpa1;Lcn2;Nos2;C5ar1;Il12b;Lpo;Hist1h2bd;Cd86;Wfdc21;Litaf;Selp;Ccr5;Adamts4;Ccl3;Star;Trem2;Fcgr2b;Ace;Arg1;Cd14;Cxcl2;Igf1;Fmo1;Sod2;Ednrb;Ly96;Hist1h2bk;Gch1;Slamf8;Ltc4s;Serpina1;LOC100365043;Lyz2;Cxcl13;Vil1;Defb4;C4b
GO:1901701	cellular response to oxygen-containing compound	89	662	4.07601e-08	1.862e-05	29597;85497;89813;24498;315215;24310;245920;24795;314386;65161;191575;25453;29200;24787;60350;50672;24464;292301;114203;25524;25728;170897;54237;117254;64041;83791;24571;291675;60582;84032;79129;29637;81743;24770;24773;50592;56822;63997;140939;171569;24883;29221;114105;448830;287526;25627;308100;292060;24950;24953;117038;25542;24890;25033;81687;24614;29427;24599;29393;117029;25557;301227;25383;25…	P2ry2;Klf15;Pdk4;Il6;Mlc1;Ace;Cxcl10;Serpina3n;Gpr68;Litaf;Nme1;Gdnf;Inhba;Sod2;Cd14;Ednrb;Hp;T;Sh2b2;Psap;Apoe;Sphk1;Cdk1;Prdx1;Birc5;Fdps;Muc1;Mzb1;Il1rn;Col3a1;Cyba;Hmgcs1;Pde2a;Ccl2;Sftpa1;Gria1;Cd86;Slc29a1;Trim63;Spon2;Wt1;Arg1;Cxcl2;Ly96;Serpinf1;Cma1;Acat2;Irf8;Srd5a1;Gcgr;Mt3;Ccl3;Esr1;Sstr1;Mmp9;Orm1;Aif1;Nos2;Col1a1;Ccr5;Star;Trem2;Apobec1;Slc6a4;Duox1;Ddias;Sox9;Rad51;Ccnb1;Gjb6;Cxcl6…
GO:0014070	response to organic cyclic compound	106	841	4.5103e-08	1.88869e-05	29597;24498;315215;24493;24310;245920;24795;81869;83731;498840;24191;89804;58966;191575;25453;29200;266684;50672;83783;29687;89784;24464;498638;25350;25728;170897;24834;54237;64041;83791;100911545;25375;60582;81503;79129;117099;29637;25033;81743;24770;24773;171112;24479;50592;116680;25732;24807;24883;29221;114105;287526;29143;29437;170568;24950;24212;25542;81680;81682;117033;24890;24891;24232;816…	P2ry2;Il6;Mlc1;Il1a;Ace;Cxcl10;Serpina3n;Gstm7;Kcnma1;Tmem173;Aldoc;Tek;Ramp2;Nme1;Gdnf;Inhba;Cyp2d1;Ednrb;Sult1a1;C1qb;Idi1;Hp;Msr1;Sftpd;Apoe;Sphk1;Tk1;Cdk1;Birc5;Fdps;LOC100911545;Aldh3a1;Il1rn;Cxcl1;Cyba;Bdh1;Hmgcs1;Sstr1;Pde2a;Ccl2;Sftpa1;Wfdc1;Idh1;Gria1;Ptpru;Acp5;Tacr1;Wt1;Arg1;Cxcl2;Serpinf1;Grn;Acta1;Dmbt1;Srd5a1;Atp1a2;Ccl3;Lifr;Lum;Mmp12;Esr1;Abcb4;C3;Mmp9;Orm1;Aif1;Nos2;Hmox1;Col1a1;…
GO:0006950	response to stress	229	2237	4.99253e-08	1.9298e-05	29597;85497;64647;89813;140868;24498;113901;84387;315215;502852;24493;24310;245920;361422;24392;29465;24795;301229;81869;295934;29610;83731;29290;84492;498840;498335;89804;360243;58966;291100;362510;66015;25453;24787;24953;60350;25694;367166;311374;59267;50676;24383;50672;289229;50568;29687;83781;29452;290757;81639;24464;100365043;25589;499926;64389;313108;25524;362634;361689;406864;25054;54237;6…	P2ry2;Klf15;Hist1h2bl;Pdk4;Fabp5;Il6;Chia;Pglyrp1;Mlc1;Cd207;Il1a;Ace;Cxcl10;Cotl1;Gja1;Trpv2;Serpina3n;Trem1;Gstm7;Chst1;Tgfbr3;Kcnma1;Adora1;Tec;Tmem173;Cxcl13;Tek;Top2a;Ramp2;Irf4;Melk;Adamts4;Gdnf;Sod2;Gcgr;Cd14;Has2;Hyal1;Duoxa1;Syt7;Slc6a12;Gapdh;Ednrb;Vangl2;Cspg5;C1qb;Lgals3;Epas1;F11;Alox15;Hp;LOC100365043;Kdr;Bpifb1;Defb4;Mms22l;Psap;C1qc;Unc93b1;Clic1;Ntrk2;Cdk1;Defb5;Prdx1;Fzd8;Ccl4;M…
GO:0009605	response to external stimulus	165	1507	8.36357e-08	3.00192e-05	29597;64647;89813;100910200;688605;79431;24498;84387;502852;24493;24310;245920;361422;24392;289237;246118;24795;83731;29290;84492;498840;498335;117551;301066;191573;65161;291100;66015;24787;60350;311374;117038;50672;83781;290757;306636;24464;100365043;81707;25589;64389;685243;367166;24807;25728;170897;24834;25054;641624;116637;25203;246074;287562;100911545;25375;60582;81503;84032;79129;117099;247…	P2ry2;Hist1h2bl;Pdk4;LOC100910200;Ccl1;Bhlhe40;Il6;Pglyrp1;Cd207;Il1a;Ace;Cxcl10;Cotl1;Gja1;Slamf8;Tubb3;Serpina3n;Kcnma1;Adora1;Tec;Tmem173;Cxcl13;Ccl22;Ccr8;Grin3a;Litaf;Irf4;Adamts4;Sod2;Cd14;Duoxa1;Mt3;Ednrb;Lgals3;F11;Efnb2;Hp;LOC100365043;Mmp14;Kdr;Defb4;Ackr4;Hyal1;Tacr1;Apoe;Sphk1;Tk1;Ntrk2;Defb5;Ccl4;Ccnb1;Scd1;Ccl12;LOC100911545;Aldh3a1;Il1rn;Cxcl1;Col3a1;Cyba;Bdh1;Slc2a1;Cxcl14;Hmgcs1;…
GO:1901700	response to oxygen-containing compound	138	1206	9.79013e-08	3.27969e-05	29597;85497;89813;24498;315215;24493;24310;245920;24392;24795;300027;29610;83731;89804;58966;314386;191573;65161;191575;25453;29200;24787;60350;50672;24464;292301;366949;114203;25524;24807;25728;170897;24834;54237;25425;117254;64041;83791;24571;291675;100911545;25375;60582;81503;84032;79129;117099;29637;25033;81743;24770;24773;79217;171112;50592;56822;63997;360228;25732;171569;24883;29221;114105;…	P2ry2;Klf15;Pdk4;Il6;Mlc1;Il1a;Ace;Cxcl10;Gja1;Serpina3n;Gpihbp1;Tgfbr3;Kcnma1;Tek;Ramp2;Gpr68;Grin3a;Litaf;Nme1;Gdnf;Inhba;Sod2;Cd14;Ednrb;Hp;T;Mafa;Sh2b2;Psap;Tacr1;Apoe;Sphk1;Tk1;Cdk1;Ctsh;Prdx1;Birc5;Fdps;Muc1;Mzb1;LOC100911545;Aldh3a1;Il1rn;Cxcl1;Col3a1;Cyba;Bdh1;Hmgcs1;Sstr1;Pde2a;Ccl2;Sftpa1;Gja3;Wfdc1;Gria1;Cd86;Slc29a1;Wfdc21;Acp5;Spon2;Wt1;Arg1;Cxcl2;Ly96;Serpinf1;Ccnb1;Grn;Acat2;Irf8;C…
GO:0002682	regulation of immune system process	93	729	1.76319e-07	5.53752e-05	499342;317676;24498;679975;84387;24493;100912290;245920;353250;304988;29290;84492;498840;498335;89804;314386;291100;191575;24988;100360950;361537;29687;83781;81639;29200;25589;499926;309304;114203;362634;361689;24832;116637;688090;291675;100911545;79126;56765;293783;84032;24770;25425;680097;56822;24807;25046;171569;81511;298566;360918;297077;294257;25704;25544;25542;25350;81687;353218;24614;29570…	Cd274;Lat2;Il6;Gpr183;Pglyrp1;Il1a;LOC100912290;Cxcl10;Niacr1;Mnda;Adora1;Tec;Tmem173;Cxcl13;Tek;Gpr68;Irf4;Nme1;RT1-M2;LOC100360950;Tyrobp;C1qb;Lgals3;Alox15;Inhba;Kdr;Bpifb1;Pdcd1lg2;Sh2b2;C1qc;Unc93b1;Thy1;Ccl4;RT1-Bb;Mzb1;LOC100911545;Cfi;Plvap;Lpxn;Col3a1;Ccl2;Ctsh;LOC680097;Cd86;Tacr1;Pigr;Spon2;Lat;C1qa;Pf4;Tmem176a;Cfb;Il2ra;Sele;Ccl3;Sftpd;Mmp9;Tnfsf9;Orm1;Serping1;Aif1;Hmox1;Fcrlb;Tlr10…
GO:0071310	cellular response to organic substance	137	1221	2.9127e-07	8.01119e-05	29597;85497;81819;89813;24498;315215;24493;24310;245920;24795;81869;304988;29610;498840;498335;305253;301066;58966;314386;301086;65161;191575;25453;29200;24787;24953;60350;25694;117038;24383;50672;50671;81639;25589;292301;498638;114203;685243;25524;25728;170897;25054;25425;64041;83791;688090;24571;287129;291675;60582;56765;100124593;84032;79129;29637;81743;24770;310621;84510;50592;56822;63997;898…	P2ry2;Klf15;Pax8;Pdk4;Il6;Mlc1;Il1a;Ace;Cxcl10;Serpina3n;Gstm7;Mnda;Tgfbr3;Tmem173;Cxcl13;Adamts3;Ccr8;Ramp2;Gpr68;Xcr1;Litaf;Nme1;Gdnf;Inhba;Sod2;Gcgr;Cd14;Has2;Mt3;Gapdh;Ednrb;Fasn;Alox15;Kdr;T;Msr1;Sh2b2;Ackr4;Psap;Apoe;Sphk1;Ntrk2;Ctsh;Birc5;Fdps;RT1-Bb;Muc1;Tmem204;Mzb1;Il1rn;Plvap;Cxcr6;Col3a1;Cyba;Hmgcs1;Pde2a;Ccl2;Iqgap3;Stmn2;Gria1;Cd86;Slc29a1;Chi3l1;Trim63;Spon2;Wt1;Arg1;Cxcl2;Ly96;Fgb…
GO:0002684	positive regulation of immune system process	65	451	2.93381e-07	8.01119e-05	362076;498335;317676;362634;361689;499342;498075;24832;25316;25704;24498;25544;116637;64545;84387;25542;679975;24232;688090;58949;81687;245920;100911545;353218;24493;79126;56765;293783;294257;24482;295703;29427;24237;84492;24451;498840;64546;501854;291100;304988;56822;305355;113959;687536;25651;171569;361226;312705;301227;24770;114203;24807;117512;25572;84007;287561;298566;29687;83781;24988;68569…	Il36b;Cxcl13;Lat2;C1qc;Unc93b1;Cd274;Trat1;Thy1;Ms4a2;Il2ra;Il6;Sele;Ccl4;Icos;Pglyrp1;Ccl3;Gpr183;C3;RT1-Bb;Ptafr;Mmp9;Cxcl10;LOC100911545;Tnfsf9;Il1a;Cfi;Plvap;Lpxn;Cfb;Igf1;Serping1;Aif1;C6;Tec;Hmox1;Tmem173;Il12b;Rab7b;Irf4;Mnda;Cd86;Tlr10;C5ar1;Foxf1;Selp;Spon2;Cd83;C1r;Trem2;Ccl2;Sh2b2;Tacr1;C9;Tnfrsf4;C3ar1;Ccl7;C1qa;C1qb;Lgals3;RT1-M2;Gcsam;C1s;Bpifb1;C4b;Pdcd1lg2
GO:0048545	response to steroid hormone	67	472	3.18304e-07	8.01119e-05	170568;24891;25154;299210;287526;24834;688605;24950;24498;64041;497672;83791;170913;25350;25569;25375;24890;24232;364018;81687;100911545;60582;170897;24648;24533;24770;24795;117099;24614;64625;25033;83731;29427;24773;24310;24599;24451;81707;24479;89804;50592;58940;116680;140939;24807;25653;114494;25453;25557;690050;191575;24464;29221;114105;24482;24212;83783;29687;29242;58966;171112;81503;81718;2…	Dmbt1;Abcb4;Pgr;Esrrb;Serpinf1;Tk1;Ccl1;Srd5a1;Il6;Birc5;Brca1;Fdps;Abcb1a;Sftpd;Trh;Aldh3a1;Esr1;C3;Ncf2;Mmp9;LOC100911545;Il1rn;Sphk1;Serpina1;Ldha;Ccl2;Serpina3n;Bdh1;Orm1;Bid;Sstr1;Kcnma1;Aif1;Sftpa1;Ace;Nos2;Hmox1;Mmp14;Idh1;Tek;Gria1;H2afz;Ptpru;Trim63;Tacr1;Tshb;Ccna2;Gdnf;Star;Tpmt;Nme1;Hp;Arg1;Cxcl2;Igf1;Atp1a2;Sult1a1;C1qb;Car4;Ramp2;Wfdc1;Cxcl1;Cdo1;Grn;Acta1;Col1a1;Slc6a4
GO:0002237	response to molecule of bacterial origin	48	290	3.18853e-07	8.01119e-05	29597;292060;84403;294257;24498;60665;25732;25542;24493;58949;59103;364018;81687;245920;310395;60582;24464;81503;24795;24614;24770;24773;170496;24599;113959;64546;56822;360228;65161;25651;117029;171569;25557;301227;24310;29221;60350;114105;24482;25256;50672;448830;29244;289211;114097;24648;24787;406161	P2ry2;Irf8;Gjb6;Cfb;Il6;Cxcl6;Acp5;Ccl3;Il1a;Ptafr;Ptges;Ncf2;Mmp9;Cxcl10;Ccr4;Il1rn;Hp;Cxcl1;Serpina3n;Orm1;Ccl2;Sftpa1;Lcn2;Nos2;C5ar1;Il12b;Cd86;Wfdc21;Litaf;Selp;Ccr5;Spon2;Star;Trem2;Ace;Arg1;Cd14;Cxcl2;Igf1;Fmo1;Ednrb;Ly96;Gch1;Fcgr2b;Ltc4s;Serpina1;Sod2;C4b
GO:0009611	response to wounding	74	545	3.74676e-07	8.96545e-05	29597;25728;406864;140868;290326;25542;54237;114097;293118;25704;24498;296654;170568;25732;84387;25364;24770;24232;24493;29427;24237;306283;100911545;117033;24392;289211;114105;84032;50654;316842;310448;24482;295703;81743;116510;29290;24310;84492;24451;29393;64546;114122;365377;116640;305355;687536;25651;363060;25453;360918;113936;117029;29366;29221;310392;117512;311374;24599;500707;691992;50672;…	P2ry2;Apoe;Clic1;Fabp5;Pbk;Ccl3;Cdk1;Ltc4s;Prcp;Il2ra;Il6;Gsn;Dmbt1;Acp5;Pglyrp1;Asic2;Ccl2;C3;Il1a;Aif1;C6;Anxa8;LOC100911545;Mmp12;Gja1;Fcgr2b;Cxcl2;Col3a1;Ctss;Metrnl;Igsf10;Igf1;Serping1;Pde2a;Timp1;Adora1;Ace;Tec;Hmox1;Col1a1;Il12b;Vcan;Trim72;Tnc;Tlr10;Foxf1;Selp;Plet1;Gdnf;Pf4;Cpb2;Ccr5;Serpine2;Arg1;Slc7a11;C9;Duoxa1;Nos2;Tc2n;Gp1ba;Ednrb;Vangl2;Cspg5;Syt7;Fgg;Serpinf1;F11;Adra2a;Alox15;F…
GO:0032496	response to lipopolysaccharide	46	275	4.25907e-07	9.72809e-05	29597;292060;84403;294257;24498;60665;25732;25542;24493;58949;59103;364018;81687;245920;310395;60582;24464;81503;24795;24614;24770;24773;170496;24599;113959;64546;56822;360228;65161;25651;117029;171569;25557;301227;24310;29221;60350;114105;24482;25256;50672;448830;29244;114097;24648;24787	P2ry2;Irf8;Gjb6;Cfb;Il6;Cxcl6;Acp5;Ccl3;Il1a;Ptafr;Ptges;Ncf2;Mmp9;Cxcl10;Ccr4;Il1rn;Hp;Cxcl1;Serpina3n;Orm1;Ccl2;Sftpa1;Lcn2;Nos2;C5ar1;Il12b;Cd86;Wfdc21;Litaf;Selp;Ccr5;Spon2;Star;Trem2;Ace;Arg1;Cd14;Cxcl2;Igf1;Fmo1;Ednrb;Ly96;Gch1;Ltc4s;Serpina1;Sod2
GO:0007059	chromosome segregation	30	139	4.76142e-07	0.000103377	171576;293733;315852;689399;64041;171529;25203;301701;360161;315330;171304;315298;311325;311327;499933;25515;684771;360243;311336;114482;500545;83620;361416;360621;288272;296137;294286;291441;305984;497672	Bub1b;Incenp;Ttk;Cenpw;Birc5;Kif2c;Ccnb1;Ndc80;Nek6;Espl1;Kif11;Racgap1;Knstrn;Casc5;Dsn1;Plk1;Cdca5;Top2a;Nusap1;Nek2;Cdca8;Cit;Cenpn;Cdc6;Mis18a;Bub1;Kifc1;Ska1;Cdca2;Brca1
GO:0051707	response to other organism	76	570	4.93741e-07	0.000103377	29597;367166;292060;84403;25335;64647;294257;171569;25704;24498;24333;25732;84387;246074;502852;24493;58949;59103;310395;81687;245920;361422;60350;60582;24464;81503;100910200;24795;301229;25542;24614;364018;24770;24773;170496;24599;113959;498840;64546;287610;361247;56822;360228;65161;291100;25651;117029;66015;689388;25557;301227;25383;289211;24310;29221;641624;114105;24482;299206;25256;24787;5067…	P2ry2;Hyal1;Irf8;Gjb6;Mmp7;Hist1h2bl;Cfb;Spon2;Il2ra;Il6;Eno1;Acp5;Pglyrp1;Scd1;Cd207;Il1a;Ptafr;Ptges;Ccr4;Mmp9;Cxcl10;Cotl1;Cd14;Il1rn;Hp;Cxcl1;LOC100910200;Serpina3n;Trem1;Ccl3;Orm1;Ncf2;Ccl2;Sftpa1;Lcn2;Nos2;C5ar1;Tmem173;Il12b;Lpo;Hist1h2bd;Cd86;Wfdc21;Litaf;Irf4;Selp;Ccr5;Adamts4;Ptx3;Star;Trem2;Apobec1;Fcgr2b;Ace;Arg1;Defb5;Cxcl2;Igf1;Batf;Fmo1;Sod2;Ednrb;Ly96;Hist1h2bk;Gch1;Slamf8;Cxcl6;L…
GO:0043207	response to external biotic stimulus	76	572	5.5634e-07	0.000111824	29597;367166;292060;84403;25335;64647;294257;171569;25704;24498;24333;25732;84387;246074;502852;24493;58949;59103;310395;81687;245920;361422;60350;60582;24464;81503;100910200;24795;301229;25542;24614;364018;24770;24773;170496;24599;113959;498840;64546;287610;361247;56822;360228;65161;291100;25651;117029;66015;689388;25557;301227;25383;289211;24310;29221;641624;114105;24482;299206;25256;24787;5067…	P2ry2;Hyal1;Irf8;Gjb6;Mmp7;Hist1h2bl;Cfb;Spon2;Il2ra;Il6;Eno1;Acp5;Pglyrp1;Scd1;Cd207;Il1a;Ptafr;Ptges;Ccr4;Mmp9;Cxcl10;Cotl1;Cd14;Il1rn;Hp;Cxcl1;LOC100910200;Serpina3n;Trem1;Ccl3;Orm1;Ncf2;Ccl2;Sftpa1;Lcn2;Nos2;C5ar1;Tmem173;Il12b;Lpo;Hist1h2bd;Cd86;Wfdc21;Litaf;Irf4;Selp;Ccr5;Adamts4;Ptx3;Star;Trem2;Apobec1;Fcgr2b;Ace;Arg1;Defb5;Cxcl2;Igf1;Batf;Fmo1;Sod2;Ednrb;Ly96;Hist1h2bk;Gch1;Slamf8;Cxcl6;L…
GO:0071396	cellular response to lipid	52	339	8.33548e-07	0.000161099	29597;292060;25154;299210;25542;24950;24498;60665;83791;170913;315215;24890;24571;81687;245920;89813;25553;24795;25728;24614;29637;25033;24770;170496;24599;29393;64546;116640;58940;56822;140939;65161;58949;117029;171569;25453;25557;29200;191575;29221;60350;114105;24212;83516;50672;448830;287526;114097;140586;292301;308100;25203	P2ry2;Irf8;Pgr;Esrrb;Ccl3;Srd5a1;Il6;Cxcl6;Fdps;Abcb1a;Mlc1;Esr1;Muc1;Mmp9;Cxcl10;Pdk4;Slc6a4;Serpina3n;Apoe;Orm1;Hmgcs1;Sstr1;Ccl2;Lcn2;Nos2;Col1a1;Il12b;Tnc;H2afz;Cd86;Trim63;Litaf;Ptafr;Ccr5;Spon2;Gdnf;Star;Inhba;Nme1;Arg1;Cd14;Cxcl2;Atp1a2;Ppargc1a;Ednrb;Ly96;Serpinf1;Ltc4s;Sox9;T;Acat2;Ccnb1
GO:0097305	response to alcohol	56	387	1.64659e-06	0.000298288	25728;24834;25542;54237;24950;296654;24498;64041;497672;83791;170913;116640;25569;24890;24232;25033;81687;245920;81503;117099;29637;24770;24310;24599;171112;29393;50592;79223;191573;24807;58940;25732;117029;114494;25453;25557;29200;24787;25383;191575;29221;60350;114105;315215;366126;287561;25086;287526;690050;58966;24648;81718;140939;29143;64625;25553	Apoe;Tk1;Ccl3;Cdk1;Srd5a1;Gsn;Il6;Birc5;Brca1;Fdps;Abcb1a;Tnc;Trh;Esr1;C3;Sstr1;Mmp9;Cxcl10;Cxcl1;Bdh1;Hmgcs1;Ccl2;Ace;Nos2;Wfdc1;Col1a1;Gria1;Gk;Grin3a;Tacr1;H2afz;Acp5;Ccr5;Ccna2;Gdnf;Star;Inhba;Sod2;Apobec1;Nme1;Arg1;Cd14;Cxcl2;Mlc1;Spi1;Ccl7;Cyp2e1;Serpinf1;Tpmt;Ramp2;Serpina1;Cdo1;Trim63;Grn;Bid;Slc6a4
GO:0009607	response to biotic stimulus	76	591	1.6621e-06	0.000298288	29597;367166;292060;84403;25335;64647;294257;171569;25704;24498;24333;25732;84387;246074;502852;24493;58949;59103;310395;81687;245920;361422;60350;60582;24464;81503;100910200;24795;301229;25542;24614;364018;24770;24773;170496;24599;113959;498840;64546;287610;361247;56822;360228;65161;291100;25651;117029;66015;689388;25557;301227;25383;289211;24310;29221;641624;114105;24482;299206;25256;24787;5067…	P2ry2;Hyal1;Irf8;Gjb6;Mmp7;Hist1h2bl;Cfb;Spon2;Il2ra;Il6;Eno1;Acp5;Pglyrp1;Scd1;Cd207;Il1a;Ptafr;Ptges;Ccr4;Mmp9;Cxcl10;Cotl1;Cd14;Il1rn;Hp;Cxcl1;LOC100910200;Serpina3n;Trem1;Ccl3;Orm1;Ncf2;Ccl2;Sftpa1;Lcn2;Nos2;C5ar1;Tmem173;Il12b;Lpo;Hist1h2bd;Cd86;Wfdc21;Litaf;Irf4;Selp;Ccr5;Adamts4;Ptx3;Star;Trem2;Apobec1;Fcgr2b;Ace;Arg1;Defb5;Cxcl2;Igf1;Batf;Fmo1;Sod2;Ednrb;Ly96;Hist1h2bk;Gch1;Slamf8;Cxcl6;L…
GO:0009725	response to hormone	94	795	2.85154e-06	0.000494104	81819;89813;24498;25375;24310;24392;24795;29610;83731;89804;360243;58966;191575;25453;29200;24953;24212;83783;29687;24464;114203;25350;25728;170897;24834;64041;83791;291675;100911545;60582;81503;117099;29637;24770;24773;25425;171112;24479;50592;116680;24807;140939;24883;29221;114105;24366;287526;29143;29437;170568;294257;24950;293118;117038;24890;24891;25033;81687;24614;29427;24599;24451;29393;11…	Pax8;Pdk4;Il6;Aldh3a1;Ace;Gja1;Serpina3n;Tgfbr3;Kcnma1;Tek;Top2a;Ramp2;Nme1;Gdnf;Inhba;Gcgr;Atp1a2;Sult1a1;C1qb;Hp;Sh2b2;Sftpd;Apoe;Sphk1;Tk1;Birc5;Fdps;Mzb1;LOC100911545;Il1rn;Cxcl1;Bdh1;Hmgcs1;Ccl2;Sftpa1;Ctsh;Wfdc1;Idh1;Gria1;Ptpru;Tacr1;Trim63;Wt1;Arg1;Cxcl2;Fgb;Serpinf1;Grn;Acta1;Dmbt1;Cfb;Srd5a1;Prcp;Mt3;Esr1;Abcb4;Sstr1;Mmp9;Orm1;Aif1;Nos2;Hmox1;Col1a1;Timp1;Tshb;Star;Apobec1;Slc6a4;Ccl1;C…
GO:0072376	protein activation cascade	14	38	3.82371e-06	0.000640471	100911545;362634;298566;29687;294257;312705;293118;192262;295703;79126;24232;117512;406161;24237	LOC100911545;C1qc;C1qa;C1qb;Cfb;C1r;Prcp;C1s;Serping1;Cfi;C3;C9;C4b;C6
GO:0031960	response to corticosteroid	36	213	5.81781e-06	0.000943048	24891;24834;24950;24498;64041;170913;25350;25569;25375;24232;24310;100911545;60582;81503;24770;24795;117099;24614;83731;29427;24773;24599;29393;116680;140939;25453;25557;688605;29221;114105;24482;83783;29687;287526;24464;81718	Abcb4;Tk1;Srd5a1;Il6;Birc5;Abcb1a;Sftpd;Trh;Aldh3a1;C3;Ace;LOC100911545;Il1rn;Cxcl1;Ccl2;Serpina3n;Bdh1;Orm1;Kcnma1;Aif1;Sftpa1;Nos2;Col1a1;Ptpru;Trim63;Gdnf;Star;Ccl1;Arg1;Cxcl2;Igf1;Sult1a1;C1qb;Serpinf1;Hp;Cdo1
GO:0006956	complement activation	13	34	6.08544e-06	0.000955604	100911545;362634;298566;29687;294257;312705;192262;295703;79126;24232;117512;406161;24237	LOC100911545;C1qc;C1qa;C1qb;Cfb;C1r;C1s;Serping1;Cfi;C3;C9;C4b;C6
GO:0006959	humoral immune response	22	96	6.67495e-06	0.00101641	362634;25335;64647;294257;679975;24232;24237;100911545;79126;289211;100910200;295703;361247;680312;171569;312705;117512;298566;29687;192262;100365043;406161	C1qc;Mmp7;Hist1h2bl;Cfb;Gpr183;C3;C6;LOC100911545;Cfi;Fcgr2b;LOC100910200;Serping1;Hist1h2bd;Hist1h2bk;Spon2;C1r;C9;C1qa;C1qb;C1s;LOC100365043;C4b
GO:0002253	activation of immune response	33	188	6.96808e-06	0.00102984	114203;317676;362634;361689;498075;24832;84387;24232;24237;100911545;79126;293783;304988;295703;84492;498840;501854;294257;56822;305355;113959;291100;58949;312705;117512;84007;298566;29687;83781;685692;192262;499926;406161	Sh2b2;Lat2;C1qc;Unc93b1;Trat1;Thy1;Pglyrp1;C3;C6;LOC100911545;Cfi;Lpxn;Mnda;Serping1;Tec;Tmem173;Rab7b;Cfb;Cd86;Tlr10;C5ar1;Irf4;Ptafr;C1r;C9;C3ar1;C1qa;C1qb;Lgals3;Gcsam;C1s;Bpifb1;C4b
GO:0042060	wound healing	44	291	7.57479e-06	0.00108752	29597;25728;406864;170568;293118;24498;296654;25203;24599;24232;24493;306283;117033;24392;360918;114105;84032;310448;24482;295703;84492;24451;29393;365377;116640;116510;25651;363060;113936;29366;25364;310392;117512;500707;691992;289229;59267;24367;290757;25083;81639;24366;316521;50692	P2ry2;Apoe;Clic1;Dmbt1;Prcp;Il6;Gsn;Ccnb1;Nos2;C3;Il1a;Anxa8;Mmp12;Gja1;Pf4;Cxcl2;Col3a1;Igsf10;Igf1;Serping1;Tec;Hmox1;Col1a1;Trim72;Tnc;Timp1;Selp;Plet1;Cpb2;Serpine2;Asic2;Slc7a11;C9;Tc2n;Gp1ba;Vangl2;Syt7;Fgg;F11;Adra2a;Alox15;Fgb;Vil1;Plaur
GO:0097306	cellular response to alcohol	23	106	9.04478e-06	0.0012625	25728;24950;24498;64041;497672;170913;315215;24890;25033;29637;24770;24599;116640;58940;140939;25453;25557;29200;24787;29221;366126;287561;287526	Apoe;Srd5a1;Il6;Birc5;Brca1;Abcb1a;Mlc1;Esr1;Sstr1;Hmgcs1;Ccl2;Nos2;Tnc;H2afz;Trim63;Gdnf;Star;Inhba;Sod2;Arg1;Spi1;Ccl7;Serpinf1
GO:0051384	response to glucocorticoid	34	202	1.11913e-05	0.0015199	24891;24834;24950;24498;64041;170913;25350;25569;25375;24232;24310;100911545;60582;81503;24770;24795;117099;24614;29427;24773;24599;116680;140939;25453;25557;688605;29221;114105;24482;83783;29687;287526;24464;81718	Abcb4;Tk1;Srd5a1;Il6;Birc5;Abcb1a;Sftpd;Trh;Aldh3a1;C3;Ace;LOC100911545;Il1rn;Cxcl1;Ccl2;Serpina3n;Bdh1;Orm1;Aif1;Sftpa1;Nos2;Ptpru;Trim63;Gdnf;Star;Ccl1;Arg1;Cxcl2;Igf1;Sult1a1;C1qb;Serpinf1;Hp;Cdo1
GO:0070555	response to interleukin-1	20	85	1.23316e-05	0.00163069	29597;60582;25728;170897;367166;89824;24599;79129;140939;24366;24795;24498;25544;140586;25542;24770;170496;114105;25694;81687	P2ry2;Il1rn;Apoe;Sphk1;Hyal1;Chi3l1;Nos2;Cyba;Trim63;Fgb;Serpina3n;Il6;Sele;Sox9;Ccl3;Ccl2;Lcn2;Cxcl2;Has2;Mmp9
GO:0045087	innate immune response	43	289	1.34876e-05	0.00173783	362634;361689;64647;294257;117254;84387;25542;25350;24232;688090;24237;100911545;79126;79129;100910200;24795;295703;29427;170496;498840;64546;361247;56822;305355;680312;58949;171569;689388;25557;24770;60350;117512;24383;298566;29687;29244;192262;100365043;679787;66021;499926;29168;83781	C1qc;Unc93b1;Hist1h2bl;Cfb;Prdx1;Pglyrp1;Ccl3;Sftpd;C3;RT1-Bb;C6;LOC100911545;Cfi;Cyba;LOC100910200;Serpina3n;Serping1;Aif1;Lcn2;Tmem173;Il12b;Hist1h2bd;Cd86;Tlr10;Hist1h2bk;Ptafr;Spon2;Ptx3;Star;Ccl2;Cd14;C9;Gapdh;C1qa;C1qb;Gch1;C1s;LOC100365043;Clec5a;Cybb;Bpifb1;Ubd;Lgals3
GO:0002526	acute inflammatory response	21	95	1.70858e-05	0.00214641	100911545;60582;50672;24464;81503;83504;288001;24807;295703;117029;25083;24498;24648;24614;293118;289211;29290;24232;24493;59103;24237	LOC100911545;Il1rn;Ednrb;Hp;Cxcl1;Kl;Kng1l1;Tacr1;Serping1;Ccr5;Adra2a;Il6;Serpina1;Orm1;Prcp;Fcgr2b;Adora1;C3;Il1a;Ptges;C6
GO:0071219	cellular response to molecule of bacterial origin	25	128	1.82599e-05	0.00223795	29597;292060;24498;60665;25542;81687;245920;289211;24770;170496;24599;64546;56822;65161;58949;117029;171569;25557;301227;29221;60350;114105;50672;448830;114097	P2ry2;Irf8;Il6;Cxcl6;Ccl3;Mmp9;Cxcl10;Fcgr2b;Ccl2;Lcn2;Nos2;Il12b;Cd86;Litaf;Ptafr;Ccr5;Spon2;Star;Trem2;Arg1;Cd14;Cxcl2;Ednrb;Ly96;Ltc4s
GO:0031099	regeneration	29	163	1.94142e-05	0.00232277	170568;300691;25728;54237;60665;25203;81680;80900;24310;306071;24392;310448;24614;29610;24770;84492;24191;114122;89804;116640;116680;113959;114494;113936;24482;50568;296654;50692;24464	Dmbt1;Nnmt;Apoe;Cdk1;Cxcl6;Ccnb1;Lifr;Slco1a5;Ace;Lcp1;Gja1;Igsf10;Orm1;Tgfbr3;Ccl2;Tec;Aldoc;Vcan;Tek;Tnc;Ptpru;C5ar1;Ccna2;Cpb2;Igf1;Cspg5;Gsn;Plaur;Hp
GO:0071347	cellular response to interleukin-1	16	59	2.05601e-05	0.00240266	29597;60582;25728;89824;24599;24366;24795;24498;367166;140586;25542;24770;170496;114105;25694;81687	P2ry2;Il1rn;Apoe;Chi3l1;Nos2;Fgb;Serpina3n;Il6;Hyal1;Sox9;Ccl3;Ccl2;Lcn2;Cxcl2;Has2;Mmp9
GO:0048878	chemical homeostasis	85	740	2.11148e-05	0.00241141	29597;79129;25350;25728;25334;89788;25589;29440;24832;293118;81869;24498;24213;64041;25316;25542;24770;25503;24890;117038;24310;245920;25349;25059;289237;81503;314386;63997;24482;117596;300027;306811;289596;100362384;83731;29290;170496;83567;24451;365901;498335;305236;25060;287424;301066;84403;315190;100360087;113959;24807;117029;170824;25557;24953;113936;245977;24886;84007;317170;25027;114105;25…	P2ry2;Cyba;Sftpd;Apoe;Bhlha15;Gna15;Kdr;Slc26a4;Thy1;Prcp;Gstm7;Il6;Atp1a3;Birc5;Ms4a2;Ccl3;Ccl2;Ocm2;Esr1;Mt3;Ace;Cxcl10;Scn2b;Hk2;Slamf8;Cxcl1;Gpr68;Slc29a1;Igf1;Atp6v1b2;Gpihbp1;Wnk2;Corin;LOC100362384;Kcnma1;Adora1;Lcn2;Mchr1;Hmox1;Gnat2;Cxcl13;Cxcl11;Hk3;Aloxe3;Ccr8;Gjb6;Upk3a;LOC100360087;C5ar1;Tacr1;Ccr5;Steap3;Star;Gcgr;Cpb2;Gpr116;Tbxas1;C3ar1;Slc9a7;Slc16a1;Cxcl2;Has2;Gja1;Slc39a14;Slc6…
GO:0009719	response to endogenous stimulus	126	1217	2.661e-05	0.00297145	29597;85497;81819;89813;24498;24493;24310;24392;24795;81869;300027;29610;83731;498335;89804;360243;58966;191575;25453;29200;24953;25694;117038;83783;29687;24464;114203;300691;25350;25728;170897;24834;25054;54237;64041;83791;291675;100911545;25375;60582;81503;84032;79129;117099;29637;81743;24770;24773;25425;171112;24479;84510;50592;116680;140939;24807;24883;29221;114105;64625;24366;287526;29143;29…	P2ry2;Klf15;Pax8;Pdk4;Il6;Il1a;Ace;Gja1;Serpina3n;Gstm7;Gpihbp1;Tgfbr3;Kcnma1;Cxcl13;Tek;Top2a;Ramp2;Nme1;Gdnf;Inhba;Gcgr;Has2;Mt3;Sult1a1;C1qb;Hp;Sh2b2;Nnmt;Sftpd;Apoe;Sphk1;Tk1;Ntrk2;Cdk1;Birc5;Fdps;Mzb1;LOC100911545;Aldh3a1;Il1rn;Cxcl1;Col3a1;Cyba;Bdh1;Hmgcs1;Pde2a;Ccl2;Sftpa1;Ctsh;Wfdc1;Idh1;Stmn2;Gria1;Ptpru;Trim63;Tacr1;Wt1;Arg1;Cxcl2;Bid;Fgb;Serpinf1;Grn;Acta1;Dmbt1;Cfb;Srd5a1;Prcp;Atp1a2;…
GO:0048514	blood vessel morphogenesis	50	376	4.15296e-05	0.00453665	367166;25728;170897;25054;24832;293118;364754;497672;24232;24493;81687;245920;24392;286896;266813;84032;292406;363265;24237;24451;81707;89804;58966;155430;89824;687536;25651;117029;24883;314818;497979;292935;311723;24310;24770;25694;287562;79242;366126;287526;29452;360918;306636;64536;81651;84007;25589;292301;25425;25627	Hyal1;Apoe;Sphk1;Ntrk2;Thy1;Prcp;Fzd8;Brca1;C3;Il1a;Mmp9;Cxcl10;Gja1;Sgpl1;Prrx1;Col3a1;Thbs2;Col4a3;C6;Hmox1;Mmp14;Tek;Ramp2;Hey2;Chi3l1;Foxf1;Selp;Ccr5;Wt1;E2f7;Tmem100;Htatip2;Sox18;Ace;Ccl2;Has2;Ccl12;Hpgd;Spi1;Serpinf1;Epas1;Pf4;Efnb2;Esm1;Cspg4;C3ar1;Kdr;T;Ctsh;Cma1
GO:0042493	response to drug	59	472	4.53318e-05	0.00484664	25330;300691;25335;25542;54237;24950;24498;24213;64041;83791;170913;360243;25375;24891;364018;81687;360539;81726;117033;60582;289237;24533;311167;79129;117099;313339;24614;29637;81743;305509;24770;170496;171112;29393;50592;24904;56822;191575;25557;25364;113936;25383;25553;24310;29221;66021;266684;117038;83516;25086;29242;29200;114097;24464;24787;689415;79223;25589;25203	Lipe;Nnmt;Mmp7;Ccl3;Cdk1;Srd5a1;Il6;Atp1a3;Birc5;Fdps;Abcb1a;Top2a;Aldh3a1;Abcb4;Ncf2;Mmp9;Slc47a1;Mvd;Mmp12;Il1rn;Slamf8;Ldha;Smtnl1;Cyba;Bdh1;Acer2;Orm1;Hmgcs1;Pde2a;Adcy1;Ccl2;Lcn2;Wfdc1;Col1a1;Gria1;Slc22a1;Cd86;Nme1;Star;Asic2;Cpb2;Apobec1;Slc6a4;Ace;Arg1;Cybb;Cyp2d1;Mt3;Ppargc1a;Cyp2e1;Car4;Inhba;Ltc4s;Hp;Sod2;Mt2A;Gk;Kdr;Ccnb1
GO:0034612	response to tumor necrosis factor	21	103	4.79374e-05	0.00501844	79129;83516;170897;56765;367166;89824;360228;29244;25054;24770;24498;29393;60350;497672;25542;29168;170496;24599;25694;25572;81687	Cyba;Ppargc1a;Sphk1;Plvap;Hyal1;Chi3l1;Wfdc21;Gch1;Ntrk2;Ccl2;Il6;Col1a1;Cd14;Brca1;Ccl3;Ubd;Lcn2;Nos2;Has2;Tnfrsf4;Mmp9
GO:0007067	mitotic nuclear division	34	220	5.20528e-05	0.00533807	171576;500545;297594;54237;689399;117524;171529;25203;360161;24493;296344;171304;246118;315298;311325;296368;294074;684771;64515;311546;311336;114482;24482;25515;83620;361416;360621;288272;294286;291441;304951;64041;309523;315330	Bub1b;Cdca8;Cdca3;Cdk1;Cenpw;Ccnf;Kif2c;Ccnb1;Nek6;Il1a;Mybl2;Kif11;Tubb3;Racgap1;Knstrn;Ube2c;Cep55;Cdca5;Cdc20;Tpx2;Nusap1;Nek2;Igf1;Plk1;Cit;Cenpn;Cdc6;Mis18a;Kifc1;Ska1;Nuf2;Birc5;Kif20b;Espl1
GO:0065008	regulation of biological quality	215	2327	5.48381e-05	0.00544383	29597;81819;89813;89788;298282;79431;24498;25503;24493;310621;245920;24392;353250;29465;311167;315298;301229;315611;300027;29610;83731;29290;311374;84492;84491;498335;78960;25060;301066;81743;80900;314386;117558;191575;25453;29200;24787;24953;289054;25694;25515;83620;50676;25753;50672;83783;29452;290757;81639;58812;25589;54227;366949;498638;114203;25350;25728;406864;170899;25054;64515;25425;11725…	P2ry2;Pax8;Pdk4;Gna15;Oma1;Bhlhe40;Il6;Ocm2;Il1a;Iqgap3;Cxcl10;Gja1;Niacr1;Trpv2;Smtnl1;Racgap1;Trem1;Scn4b;Gpihbp1;Tgfbr3;Kcnma1;Adora1;Duoxa1;Tec;Qsox1;Cxcl13;Prx;Hk3;Ccr8;Pde2a;Slco1a5;Gpr68;Mylk2;Nme1;Gdnf;Inhba;Sod2;Gcgr;Aspm;Has2;Plk1;Cit;Slc6a12;Chrng;Ednrb;Sult1a1;Epas1;F11;Alox15;Apln;Kdr;Arpc1b;Mafa;Msr1;Sh2b2;Sftpd;Apoe;Clic1;Kcnk2;Ntrk2;Cdc20;Ctsh;Prdx1;Ccl4;Ccnb1;Prlhr;Sgpl1;Sorcs3;A…
GO:0071222	cellular response to lipopolysaccharide	23	121	5.56416e-05	0.00544383	29597;292060;24498;60665;25542;81687;245920;24770;170496;24599;64546;56822;65161;58949;117029;171569;25557;29221;60350;114105;50672;448830;114097	P2ry2;Irf8;Il6;Cxcl6;Ccl3;Mmp9;Cxcl10;Ccl2;Lcn2;Nos2;Il12b;Cd86;Litaf;Ptafr;Ccr5;Spon2;Star;Arg1;Cd14;Cxcl2;Ednrb;Ly96;Ltc4s
GO:0009628	response to abiotic stimulus	96	889	5.63341e-05	0.00544383	79431;24498;315215;308768;24493;24310;245920;24392;29465;29610;83731;29290;24191;89804;58966;314386;299242;363227;24787;60350;50676;29452;24464;81707;25589;25350;25054;25203;24571;25375;81503;84032;79129;24778;29637;81743;24770;24773;79217;50592;63997;89824;140939;24807;50599;114105;117038;26296;287526;29437;289777;24212;24213;316330;81687;316842;29427;24599;24451;29393;25654;289747;117029;25557;…	Bhlhe40;Il6;Mlc1;Ticrr;Il1a;Ace;Cxcl10;Gja1;Trpv2;Tgfbr3;Kcnma1;Adora1;Aldoc;Tek;Ramp2;Gpr68;Gpr65;Nabp1;Sod2;Cd14;Slc6a12;Epas1;Hp;Mmp14;Kdr;Sftpd;Ntrk2;Ccnb1;Muc1;Aldh3a1;Cxcl1;Col3a1;Cyba;Slc2a1;Hmgcs1;Pde2a;Ccl2;Sftpa1;Gja3;Gria1;Slc29a1;Chi3l1;Trim63;Tacr1;Kcnj3;Cxcl2;Mt3;Tfec;Serpinf1;Acta1;Fignl1;Atp1a2;Atp1a3;Ankrd23;Mmp9;Metrnl;Aif1;Nos2;Hmox1;Col1a1;Col11a1;Osm;Ccr5;Star;Apobec1;Slc6a4;…
GO:0006958	complement activation, classical pathway	9	20	6.07764e-05	0.00576229	362634;298566;29687;192262;295703;79126;24232;117512;24237	C1qc;C1qa;C1qb;C1s;Serping1;Cfi;C3;C9;C6
GO:0042742	defense response to bacterium	26	149	6.72444e-05	0.00625746	498335;292060;25335;64647;641624;24498;60665;84387;246074;287610;289237;100910200;24599;680312;64546;361247;113959;25732;117029;171569;66015;301229;24464;100365043;688047;64389	Cxcl13;Irf8;Mmp7;Hist1h2bl;Defb5;Il6;Cxcl6;Pglyrp1;Scd1;Lpo;Slamf8;LOC100910200;Nos2;Hist1h2bk;Il12b;Hist1h2bd;C5ar1;Acp5;Ccr5;Spon2;Adamts4;Trem1;Hp;LOC100365043;Lyz2;Defb4
GO:0001944	vasculature development	57	459	7.04528e-05	0.00643682	367166;25728;170897;25054;24832;293118;364754;497672;24232;24493;295691;81687;245920;117092;24392;286896;266813;84032;24482;292406;29610;363265;24237;287129;24451;81707;29393;89804;58966;155430;89824;687536;25651;117029;24883;314818;497979;64191;292935;311723;24310;24770;25694;287562;79242;366126;287526;29452;360918;306636;64536;81651;84007;25589;292301;25425;25627	Hyal1;Apoe;Sphk1;Ntrk2;Thy1;Prcp;Fzd8;Brca1;C3;Il1a;Frzb;Mmp9;Cxcl10;Serpinb7;Gja1;Sgpl1;Prrx1;Col3a1;Igf1;Thbs2;Tgfbr3;Col4a3;C6;Tmem204;Hmox1;Mmp14;Col1a1;Tek;Ramp2;Hey2;Chi3l1;Foxf1;Selp;Ccr5;Wt1;E2f7;Tmem100;Dhcr7;Htatip2;Sox18;Ace;Ccl2;Has2;Ccl12;Hpgd;Spi1;Serpinf1;Epas1;Pf4;Efnb2;Esm1;Cspg4;C3ar1;Kdr;T;Ctsh;Cma1
GO:0071216	cellular response to biotic stimulus	25	144	9.84816e-05	0.00883696	29597;292060;24498;60665;25542;81687;245920;289211;24770;170496;24599;64546;56822;65161;58949;117029;171569;25557;301227;29221;60350;114105;50672;448830;114097	P2ry2;Irf8;Il6;Cxcl6;Ccl3;Mmp9;Cxcl10;Fcgr2b;Ccl2;Lcn2;Nos2;Il12b;Cd86;Litaf;Ptafr;Ccr5;Spon2;Star;Trem2;Arg1;Cd14;Cxcl2;Ednrb;Ly96;Ltc4s
GO:0001568	blood vessel development	54	435	0.000107775	0.00950121	367166;25728;170897;25054;24832;293118;364754;497672;24232;24493;81687;245920;117092;24392;286896;266813;84032;292406;29610;363265;24237;24451;81707;29393;89804;58966;155430;89824;687536;25651;117029;24883;314818;497979;64191;292935;311723;24310;24770;25694;287562;79242;366126;287526;29452;360918;306636;64536;81651;84007;25589;292301;25425;25627	Hyal1;Apoe;Sphk1;Ntrk2;Thy1;Prcp;Fzd8;Brca1;C3;Il1a;Mmp9;Cxcl10;Serpinb7;Gja1;Sgpl1;Prrx1;Col3a1;Thbs2;Tgfbr3;Col4a3;C6;Hmox1;Mmp14;Col1a1;Tek;Ramp2;Hey2;Chi3l1;Foxf1;Selp;Ccr5;Wt1;E2f7;Tmem100;Dhcr7;Htatip2;Sox18;Ace;Ccl2;Has2;Ccl12;Hpgd;Spi1;Serpinf1;Epas1;Pf4;Efnb2;Esm1;Cspg4;C3ar1;Kdr;T;Ctsh;Cma1
GO:0002252	immune effector process	49	383	0.000114407	0.00991198	317676;362634;294257;25316;25704;24498;679975;60665;689388;84387;25542;25350;24232;688090;502852;24237;245920;100911545;79126;289211;301229;295703;299206;306071;24310;24451;498840;64546;291675;89804;291100;56822;361537;687536;171569;25425;312705;25383;81511;24770;117512;25572;117254;298566;29687;83781;24988;192262;406161	Lat2;C1qc;Cfb;Ms4a2;Il2ra;Il6;Gpr183;Cxcl6;Ptx3;Pglyrp1;Ccl3;Sftpd;C3;RT1-Bb;Cd207;C6;Cxcl10;LOC100911545;Cfi;Fcgr2b;Trem1;Serping1;Batf;Lcp1;Ace;Hmox1;Tmem173;Il12b;Mzb1;Tek;Irf4;Cd86;Tyrobp;Foxf1;Spon2;Ctsh;C1r;Apobec1;Lat;Ccl2;C9;Tnfrsf4;Prdx1;C1qa;C1qb;Lgals3;RT1-M2;C1s;C4b
GO:1903047	mitotic cell cycle process	53	426	0.000117845	0.0100368	171576;304477;500545;297594;54237;689399;117524;171529;25203;301701;170913;308768;360161;24571;310621;24649;24493;296344;171304;246118;315298;311325;296368;114482;298850;29427;294074;684771;360243;64515;311546;114494;314818;29200;298884;315852;363227;24482;25515;83620;361416;360621;288272;311336;296137;294286;291441;304951;64041;306575;309523;64625;315330	Bub1b;Kntc1;Cdca8;Cdca3;Cdk1;Cenpw;Ccnf;Kif2c;Ccnb1;Ndc80;Abcb1a;Ticrr;Nek6;Muc1;Iqgap3;Pim1;Il1a;Mybl2;Kif11;Tubb3;Racgap1;Knstrn;Ube2c;Nek2;Cenpa;Aif1;Cep55;Cdca5;Top2a;Cdc20;Tpx2;Ccna2;E2f7;Inhba;Gen1;Ttk;Nabp1;Igf1;Plk1;Cit;Cenpn;Cdc6;Mis18a;Nusap1;Bub1;Kifc1;Ska1;Nuf2;Birc5;Ckap2;Kif20b;Bid;Espl1
GO:0042592	homeostatic process	112	1099	0.00012377	0.0103657	29597;89813;89788;298282;24498;25503;24493;24310;245920;24392;353250;289237;81869;300027;29610;83731;29290;29292;54264;84491;498335;25060;301066;314386;191575;29200;24787;24953;25694;113910;50676;50672;29452;288026;58812;25589;114203;25350;25728;25059;24832;117254;64041;81639;60582;29440;79129;24476;24770;317170;63997;25732;24807;25046;170824;24886;114105;100362805;689415;81511;25334;293118;25704…	P2ry2;Pdk4;Gna15;Oma1;Il6;Ocm2;Il1a;Ace;Cxcl10;Gja1;Niacr1;Slamf8;Gstm7;Gpihbp1;Tgfbr3;Kcnma1;Adora1;Ftl1;Mafb;Qsox1;Cxcl13;Hk3;Ccr8;Gpr68;Nme1;Inhba;Sod2;Gcgr;Has2;Prnd;Slc6a12;Ednrb;Epas1;Atp13a4;Apln;Kdr;Sh2b2;Sftpd;Apoe;Hk2;Thy1;Prdx1;Birc5;Alox15;Il1rn;Slc26a4;Cyba;Iapp;Ccl2;Slc9a7;Slc29a1;Acp5;Tacr1;Pigr;Steap3;Tbxas1;Cxcl2;Txndc5;Mt2A;Lat;Bhlha15;Prcp;Il2ra;Atp1a2;Atp1a3;Ccl3;Esr1;Ctsh;Met…
GO:0007584	response to nutrient	33	222	0.000127761	0.0105246	294257;296654;497672;170913;25375;81687;245920;100911545;24493;291437;24795;117099;24614;24533;29637;24770;24773;24599;24451;29393;116640;25027;25732;25653;25557;24787;25553;29221;113976;114097;24464;66021;308100	Cfb;Gsn;Brca1;Abcb1a;Aldh3a1;Mmp9;Cxcl10;LOC100911545;Il1a;Lipg;Serpina3n;Bdh1;Orm1;Ldha;Hmgcs1;Ccl2;Sftpa1;Nos2;Hmox1;Col1a1;Tnc;Slc16a1;Acp5;Tshb;Star;Sod2;Slc6a4;Arg1;Acsl4;Ltc4s;Hp;Cybb;Acat2
GO:0050776	regulation of immune response	49	386	0.000135168	0.0109551	114203;317676;362634;361689;498075;24832;25316;25704;24498;304988;84387;24232;688090;24237;100911545;79126;289211;293783;84032;294257;685692;295703;25425;84492;24451;498840;64546;501854;89804;291100;498275;56822;305355;113959;687536;58949;25046;171569;312705;117512;84007;298566;29687;83781;24988;81639;192262;499926;406161	Sh2b2;Lat2;C1qc;Unc93b1;Trat1;Thy1;Ms4a2;Il2ra;Il6;Mnda;Pglyrp1;C3;RT1-Bb;C6;LOC100911545;Cfi;Fcgr2b;Lpxn;Col3a1;Cfb;Gcsam;Serping1;Ctsh;Tec;Hmox1;Tmem173;Il12b;Rab7b;Tek;Irf4;Fcrlb;Cd86;Tlr10;C5ar1;Foxf1;Ptafr;Pigr;Spon2;C1r;C9;C3ar1;C1qa;C1qb;Lgals3;RT1-M2;Alox15;C1s;Bpifb1;C4b
GO:0031100	organ regeneration	17	79	0.000138214	0.0110242	24191;306071;89804;300691;116680;113959;54237;60665;114494;24464;24614;113936;29610;81680;24770;80900;24310	Aldoc;Lcp1;Tek;Nnmt;Ptpru;C5ar1;Cdk1;Cxcl6;Ccna2;Hp;Orm1;Cpb2;Tgfbr3;Lifr;Ccl2;Slco1a5;Ace
GO:0010035	response to inorganic substance	55	451	0.00014123	0.0110888	25524;24807;170897;24834;54237;24366;24498;296654;25203;170913;24232;24493;59103;117038;81687;114097;24464;24533;117099;29637;83731;305509;113898;170496;24599;24451;29393;50592;56822;100360087;288589;25732;25653;25557;24787;25383;29221;60350;24773;117254;79217;83516;29292;59267;24367;25086;266807;287526;81639;24648;81651;689415;691657;29437;287877	Psap;Tacr1;Sphk1;Tk1;Cdk1;Fgb;Il6;Gsn;Ccnb1;Abcb1a;C3;Il1a;Ptges;Mt3;Mmp9;Ltc4s;Hp;Ldha;Bdh1;Hmgcs1;Kcnma1;Adcy1;Prdx5;Lcn2;Nos2;Hmox1;Col1a1;Gria1;Cd86;LOC100360087;Rasa4;Acp5;Tshb;Star;Sod2;Apobec1;Arg1;Cd14;Sftpa1;Prdx1;Gja3;Ppargc1a;Ftl1;Syt7;Fgg;Cyp2e1;Duox1;Serpinf1;Alox15;Serpina1;Cspg4;Mt2A;Crip1;Acta1;Pycr1
GO:0003018	vascular process in circulatory system	25	148	0.000143822	0.0111185	29597;25728;24212;116637;24310;24392;311167;81743;83731;29290;24599;58966;24807;24787;24886;25364;50672;24366;24367;29244;25083;288001;58812;25589;25553	P2ry2;Apoe;Atp1a2;Ccl4;Ace;Gja1;Smtnl1;Pde2a;Kcnma1;Adora1;Nos2;Ramp2;Tacr1;Sod2;Tbxas1;Asic2;Ednrb;Fgb;Fgg;Gch1;Adra2a;Kng1l1;Apln;Kdr;Slc6a4
GO:0071407	cellular response to organic cyclic compound	42	317	0.000172753	0.0131528	498638;29597;25728;25154;299210;25542;24950;24498;497672;25203;170913;116640;24890;25033;60582;79129;24795;81869;24614;29637;81743;29427;24599;29393;687536;50592;58940;25027;140939;24212;25453;25557;29200;25553;24770;29221;24883;315215;287526;114090;498840;499870	Msr1;P2ry2;Apoe;Pgr;Esrrb;Ccl3;Srd5a1;Il6;Brca1;Ccnb1;Abcb1a;Tnc;Esr1;Sstr1;Il1rn;Cyba;Serpina3n;Gstm7;Orm1;Hmgcs1;Pde2a;Aif1;Nos2;Col1a1;Foxf1;Gria1;H2afz;Slc16a1;Trim63;Atp1a2;Gdnf;Star;Inhba;Slc6a4;Ccl2;Arg1;Wt1;Mlc1;Serpinf1;Egr2;Tmem173;Rad51
GO:1901342	regulation of vasculature development	27	170	0.000196083	0.0147062	170897;497672;24232;24493;24237;245920;117092;292406;363265;25425;24451;89804;58966;155430;89824;117029;24883;497979;292935;24770;81687;84007;287526;360918;367166;25589;25627	Sphk1;Brca1;C3;Il1a;C6;Cxcl10;Serpinb7;Thbs2;Col4a3;Ctsh;Hmox1;Tek;Ramp2;Hey2;Chi3l1;Ccr5;Wt1;Tmem100;Htatip2;Ccl2;Mmp9;C3ar1;Serpinf1;Pf4;Hyal1;Kdr;Cma1
GO:0098542	defense response to other organism	35	249	0.000213854	0.0158032	498335;292060;25335;64647;171569;25704;24498;60665;84387;246074;502852;245920;361422;289237;100910200;24599;680312;498840;64546;287610;361247;56822;113959;291100;25732;117029;66015;25383;641624;301229;299206;24464;100365043;688047;64389	Cxcl13;Irf8;Mmp7;Hist1h2bl;Spon2;Il2ra;Il6;Cxcl6;Pglyrp1;Scd1;Cd207;Cxcl10;Cotl1;Slamf8;LOC100910200;Nos2;Hist1h2bk;Tmem173;Il12b;Lpo;Hist1h2bd;Cd86;C5ar1;Irf4;Acp5;Ccr5;Adamts4;Apobec1;Defb5;Trem1;Batf;Hp;LOC100365043;Lyz2;Defb4
GO:0051239	regulation of multicellular organismal process	167	1791	0.000228212	0.0166198	29597;81819;89813;499342;298282;24498;113901;84387;24493;100912290;310621;245920;24392;353250;29465;315691;315611;304988;29610;83731;29290;84492;498840;498335;89804;58966;314386;65161;291100;191575;25453;29200;289054;100360950;60350;311374;83620;361537;50672;289229;83781;29452;290757;306636;58812;25589;362634;25728;406864;500590;54237;25425;116637;83791;117258;60582;84032;79129;24476;306748;11651…	P2ry2;Pax8;Pdk4;Cd274;Oma1;Il6;Chia;Pglyrp1;Il1a;LOC100912290;Iqgap3;Cxcl10;Gja1;Niacr1;Trpv2;Lingo1;Scn4b;Mnda;Tgfbr3;Kcnma1;Adora1;Tec;Tmem173;Cxcl13;Tek;Ramp2;Gpr68;Litaf;Irf4;Nme1;Gdnf;Inhba;Aspm;LOC100360950;Cd14;Duoxa1;Cit;Tyrobp;Ednrb;Vangl2;Lgals3;Epas1;F11;Efnb2;Apln;Kdr;C1qc;Apoe;Clic1;Tnfrsf9;Cdk1;Ctsh;Ccl4;Fdps;Cntn1;Il1rn;Col3a1;Cyba;Iapp;Cxcl14;Timp1;Ccl2;Ace;Stmn2;LOC680097;Cd86;Ch…
GO:0032963	collagen metabolic process	13	52	0.000237114	0.0170214	305253;63849;117092;25335;24770;24498;29221;29175;113898;29393;50654;81707;81687	Adamts3;Mmp8;Serpinb7;Mmp7;Ccl2;Il6;Arg1;Ctsk;Prdx5;Col1a1;Ctss;Mmp14;Mmp9
GO:0030335	positive regulation of cell migration	35	252	0.000261465	0.0184982	29597;24807;25154;25544;116637;25542;24493;81687;245920;170897;24482;29427;25425;81707;29393;498335;89804;56765;25651;687536;25732;117029;363060;84397;24770;25694;84007;287561;83781;117264;25083;367166;140586;25589;316521	P2ry2;Tacr1;Pgr;Sele;Ccl4;Ccl3;Il1a;Mmp9;Cxcl10;Sphk1;Igf1;Aif1;Ctsh;Mmp14;Col1a1;Cxcl13;Tek;Plvap;Selp;Foxf1;Acp5;Ccr5;Plet1;Tnfaip6;Ccl2;Has2;C3ar1;Ccl7;Lgals3;P2ry6;Adra2a;Hyal1;Sox9;Kdr;Vil1
GO:0002687	positive regulation of leukocyte migration	15	68	0.000265048	0.0184982	498335;245920;84007;56765;287561;24807;83781;25651;24770;25544;116637;25542;29427;24493;81687	Cxcl13;Cxcl10;C3ar1;Plvap;Ccl7;Tacr1;Lgals3;Selp;Ccl2;Sele;Ccl4;Ccl3;Aif1;Il1a;Mmp9
GO:0002455	humoral immune response mediated by circulating immunoglobulin	10	32	0.00027846	0.019168	362634;289211;298566;29687;192262;295703;79126;24232;117512;24237	C1qc;Fcgr2b;C1qa;C1qb;C1s;Serping1;Cfi;C3;C9;C6
GO:0042311	vasodilation	14	61	0.000296255	0.0201173	29597;24392;311167;29244;25083;25728;288001;24787;58812;83731;25589;29290;24599;50672	P2ry2;Gja1;Smtnl1;Gch1;Adra2a;Apoe;Kng1l1;Sod2;Apln;Kcnma1;Kdr;Adora1;Nos2;Ednrb
GO:0051983	regulation of chromosome segregation	13	54	0.000324502	0.0215906	83620;684771;360621;296137;298884;315298;311325;114482;171529;171576;25203;360161;25515	Cit;Cdca5;Cdc6;Bub1;Gen1;Racgap1;Knstrn;Nek2;Kif2c;Bub1b;Ccnb1;Nek6;Plk1
GO:0010038	response to metal ion	40	307	0.00032791	0.0215906	170897;24834;54237;24498;296654;25203;170913;24232;24493;59103;117038;81687;24464;117099;83731;305509;29292;24599;24451;50592;56822;100360087;288589;25732;25653;25557;24787;25383;29221;60350;59267;24366;24367;287526;81639;24648;81651;689415;691657;29437	Sphk1;Tk1;Cdk1;Il6;Gsn;Ccnb1;Abcb1a;C3;Il1a;Ptges;Mt3;Mmp9;Hp;Bdh1;Kcnma1;Adcy1;Ftl1;Nos2;Hmox1;Gria1;Cd86;LOC100360087;Rasa4;Acp5;Tshb;Star;Sod2;Apobec1;Arg1;Cd14;Syt7;Fgb;Fgg;Serpinf1;Alox15;Serpina1;Cspg4;Mt2A;Crip1;Acta1
GO:0071356	cellular response to tumor necrosis factor	17	86	0.000330941	0.0215906	79129;83516;170897;56765;367166;89824;25054;24498;29393;497672;25542;24770;170496;24599;25694;25572;81687	Cyba;Ppargc1a;Sphk1;Plvap;Hyal1;Chi3l1;Ntrk2;Il6;Col1a1;Brca1;Ccl3;Ccl2;Lcn2;Nos2;Has2;Tnfrsf4;Mmp9
GO:0051272	positive regulation of cellular component movement	36	266	0.000335138	0.0215906	29597;24807;25154;25544;116637;25542;24493;81687;245920;170897;24482;29427;25425;81707;29393;498335;89804;117558;56765;25651;687536;25732;117029;363060;84397;24770;25694;84007;287561;83781;117264;25083;367166;140586;25589;316521	P2ry2;Tacr1;Pgr;Sele;Ccl4;Ccl3;Il1a;Mmp9;Cxcl10;Sphk1;Igf1;Aif1;Ctsh;Mmp14;Col1a1;Cxcl13;Tek;Mylk2;Plvap;Selp;Foxf1;Acp5;Ccr5;Plet1;Tnfaip6;Ccl2;Has2;C3ar1;Ccl7;Lgals3;P2ry6;Adra2a;Hyal1;Sox9;Kdr;Vil1
GO:0044259	multicellular organismal macromolecule metabolic process	13	55	0.000377607	0.0238019	305253;63849;117092;25335;24770;24498;29221;29175;113898;29393;50654;81707;81687	Adamts3;Mmp8;Serpinb7;Mmp7;Ccl2;Il6;Arg1;Ctsk;Prdx5;Col1a1;Ctss;Mmp14;Mmp9
GO:0000280	nuclear division	41	320	0.000378935	0.0238019	171576;500545;297594;54237;689399;117524;171529;25203;360161;24493;296344;171304;246118;315298;311325;296368;294074;684771;360243;64515;311546;289747;498709;311336;361416;114482;289054;24482;25515;83620;502372;360621;288272;292206;294286;291441;304951;64041;309523;315330;499870	Bub1b;Cdca8;Cdca3;Cdk1;Cenpw;Ccnf;Kif2c;Ccnb1;Nek6;Il1a;Mybl2;Kif11;Tubb3;Racgap1;Knstrn;Ube2c;Cep55;Cdca5;Top2a;Cdc20;Tpx2;Osm;Cks2;Nusap1;Cenpn;Nek2;Aspm;Igf1;Plk1;Cit;Syce1;Cdc6;Mis18a;Trip13;Kifc1;Ska1;Nuf2;Birc5;Kif20b;Espl1;Rad51
GO:0016477	cell migration	82	780	0.000389163	0.0241425	29597;24807;25728;25154;114122;25054;24832;117551;293118;25544;116637;360918;301229;25542;24493;287562;81687;245920;685692;117033;60582;24392;286896;81503;25425;84032;24770;360579;81651;170897;24482;688605;306748;29610;60665;116510;29290;24310;65048;81707;29393;64546;305236;89804;56765;306071;116680;25732;113959;687536;25651;363060;25453;25589;304913;117029;84397;29186;289054;117232;311723;114105…	P2ry2;Tacr1;Apoe;Pgr;Vcan;Ntrk2;Thy1;Ccl22;Prcp;Sele;Ccl4;Pf4;Trem1;Ccl3;Il1a;Ccl12;Mmp9;Cxcl10;Gcsam;Mmp12;Il1rn;Gja1;Sgpl1;Cxcl1;Ctsh;Col3a1;Ccl2;Ccl9;Cspg4;Sphk1;Igf1;Ccl1;Cxcl14;Tgfbr3;Cxcl6;Timp1;Adora1;Ace;Fat2;Mmp14;Col1a1;Il12b;Cxcl11;Tek;Plvap;Lcp1;Ptpru;Acp5;C5ar1;Foxf1;Selp;Plet1;Gdnf;Kdr;Tnn;Ccr5;Tnfaip6;Cd63;Aspm;Barhl1;Sox18;Cxcl2;Has2;RGD1307443;Aif1;Ppargc1a;Ednrb;C3ar1;Ccl7;Lgals…
GO:2000147	positive regulation of cell motility	35	259	0.000411146	0.0251952	29597;24807;25154;25544;116637;25542;24493;81687;245920;170897;24482;29427;25425;81707;29393;498335;89804;56765;25651;687536;25732;117029;363060;84397;24770;25694;84007;287561;83781;117264;25083;367166;140586;25589;316521	P2ry2;Tacr1;Pgr;Sele;Ccl4;Ccl3;Il1a;Mmp9;Cxcl10;Sphk1;Igf1;Aif1;Ctsh;Mmp14;Col1a1;Cxcl13;Tek;Plvap;Selp;Foxf1;Acp5;Ccr5;Plet1;Tnfaip6;Ccl2;Has2;C3ar1;Ccl7;Lgals3;P2ry6;Adra2a;Hyal1;Sox9;Kdr;Vil1
GO:0055082	cellular chemical homeostasis	56	485	0.000423449	0.0256365	29597;25728;25059;89788;25589;24832;25316;24212;24213;64041;25542;25503;24890;117038;24310;245920;24392;289237;81503;79129;117596;100362384;83731;84007;29292;83567;365901;498335;305236;25060;301066;84403;314386;100360087;113959;24807;117029;25557;113936;24886;24770;114105;113910;306009;50676;287562;50672;301086;287526;63997;25083;288026;81869;689415;191575;25627	P2ry2;Apoe;Hk2;Gna15;Kdr;Thy1;Ms4a2;Atp1a2;Atp1a3;Birc5;Ccl3;Ocm2;Esr1;Mt3;Ace;Cxcl10;Gja1;Slamf8;Cxcl1;Cyba;Atp6v1b2;LOC100362384;Kcnma1;C3ar1;Ftl1;Mchr1;Gnat2;Cxcl13;Cxcl11;Hk3;Ccr8;Gjb6;Gpr68;LOC100360087;C5ar1;Tacr1;Ccr5;Star;Cpb2;Tbxas1;Ccl2;Cxcl2;Prnd;Slc39a14;Slc6a12;Ccl12;Ednrb;Xcr1;Serpinf1;Slc29a1;Adra2a;Atp13a4;Gstm7;Mt2A;Nme1;Cma1
GO:0032879	regulation of localization	149	1594	0.000428725	0.0256469	29597;81819;499342;24498;113901;315215;24493;24310;245920;24392;353250;29465;315298;315611;29610;83731;29290;498840;498335;89804;314386;65161;117558;25453;29200;60350;25694;25054;50672;83781;117264;81639;58812;25589;498638;367166;25350;25728;406864;500590;54237;117254;314847;116637;25203;117258;291675;306071;60582;81503;84032;79129;140586;81743;116510;24770;29639;25425;63848;26989;56765;116680;24…	P2ry2;Pax8;Cd274;Il6;Chia;Mlc1;Il1a;Ace;Cxcl10;Gja1;Niacr1;Trpv2;Racgap1;Scn4b;Tgfbr3;Kcnma1;Adora1;Tmem173;Cxcl13;Tek;Gpr68;Litaf;Mylk2;Gdnf;Inhba;Cd14;Has2;Ntrk2;Ednrb;Lgals3;P2ry6;Alox15;Apln;Kdr;Msr1;Hyal1;Sftpd;Apoe;Clic1;Tnfrsf9;Cdk1;Prdx1;Best3;Ccl4;Ccnb1;Cntn1;Mzb1;Lcp1;Il1rn;Cxcl1;Col3a1;Cyba;Sox9;Pde2a;Timp1;Ccl2;Fxyd2;Ctsh;Fxyd7;Cadps;Plvap;Ptpru;Tacr1;Acp5;Kcnj3;LOC100360977;Arg1;Acsl…
GO:0055080	cation homeostasis	53	454	0.000469765	0.0277714	29597;25728;89813;89788;29440;24832;25316;24212;24213;25542;25503;24890;317170;245920;24392;289237;81503;79129;117596;289596;100362384;83731;29290;170496;83567;24451;365901;498335;305236;301066;315190;100360087;113959;24807;117029;170824;24787;84007;24770;114105;83504;306009;117038;29292;287562;50672;301086;113910;29452;288026;81869;689415;25589	P2ry2;Apoe;Pdk4;Gna15;Slc26a4;Thy1;Ms4a2;Atp1a2;Atp1a3;Ccl3;Ocm2;Esr1;Slc9a7;Cxcl10;Gja1;Slamf8;Cxcl1;Cyba;Atp6v1b2;Corin;LOC100362384;Kcnma1;Adora1;Lcn2;Mchr1;Hmox1;Gnat2;Cxcl13;Cxcl11;Ccr8;Upk3a;LOC100360087;C5ar1;Tacr1;Ccr5;Steap3;Sod2;C3ar1;Ccl2;Cxcl2;Kl;Slc39a14;Mt3;Ftl1;Ccl12;Ednrb;Xcr1;Prnd;Epas1;Atp13a4;Gstm7;Mt2A;Kdr
GO:0050880	regulation of blood vessel size	22	134	0.000490435	0.0283556	29597;25728;24212;24310;24392;311167;83731;29290;24599;24807;24787;24886;25364;50672;24366;24367;29244;25083;288001;58812;25589;25553	P2ry2;Apoe;Atp1a2;Ace;Gja1;Smtnl1;Kcnma1;Adora1;Nos2;Tacr1;Sod2;Tbxas1;Asic2;Ednrb;Fgb;Fgg;Gch1;Adra2a;Kng1l1;Apln;Kdr;Slc6a4
GO:0009991	response to extracellular stimulus	53	455	0.000491886	0.0283556	25728;170897;298282;24834;170913;24950;24953;24498;296654;497672;25027;24493;25033;81687;245920;100911545;25375;60582;89813;291437;79129;24795;117099;24778;24614;24533;29637;29427;24773;170496;24599;24451;29393;294257;116640;25732;25653;25557;24787;25553;24770;24310;29221;310395;24482;113976;117038;83516;114097;24464;66021;29437;308100	Apoe;Sphk1;Oma1;Tk1;Abcb1a;Srd5a1;Gcgr;Il6;Gsn;Brca1;Slc16a1;Il1a;Sstr1;Mmp9;Cxcl10;LOC100911545;Aldh3a1;Il1rn;Pdk4;Lipg;Cyba;Serpina3n;Bdh1;Slc2a1;Orm1;Ldha;Hmgcs1;Aif1;Sftpa1;Lcn2;Nos2;Hmox1;Col1a1;Cfb;Tnc;Acp5;Tshb;Star;Sod2;Slc6a4;Ccl2;Ace;Arg1;Ccr4;Igf1;Acsl4;Mt3;Ppargc1a;Ltc4s;Hp;Cybb;Acta1;Acat2
GO:0070723	response to cholesterol	8	22	0.000496577	0.0283556	25728;25732;117029;29200;29637;83791;25542;315215	Apoe;Acp5;Ccr5;Inhba;Hmgcs1;Fdps;Ccl3;Mlc1
GO:0006953	acute-phase response	10	35	0.000505139	0.0285205	100911545;60582;50672;24464;288001;117029;24498;24648;24614;24493	LOC100911545;Il1rn;Ednrb;Hp;Kng1l1;Ccr5;Il6;Serpina1;Orm1;Il1a
GO:0001101	response to acid chemical	38	294	0.000520039	0.0287698	25728;89813;24498;296654;83791;170913;116640;24493;59103;24571;81687;24648;84032;79129;81718;313339;24614;29610;24770;24773;25425;29393;89804;50592;24807;25732;191575;24787;25553;29221;83516;25086;287526;24464;140586;292301;308100;25203	Apoe;Pdk4;Il6;Gsn;Fdps;Abcb1a;Tnc;Il1a;Ptges;Muc1;Mmp9;Serpina1;Col3a1;Cyba;Cdo1;Acer2;Orm1;Tgfbr3;Ccl2;Sftpa1;Ctsh;Col1a1;Tek;Gria1;Tacr1;Acp5;Nme1;Sod2;Slc6a4;Arg1;Ppargc1a;Cyp2e1;Serpinf1;Hp;Sox9;T;Acat2;Ccnb1
GO:0043627	response to estrogen	31	222	0.000521005	0.0287698	170568;25154;24950;497672;170913;24232;24890;25033;58966;24533;117099;83731;81687;24599;171112;81707;29393;89804;50592;58940;81503;24807;25653;114494;25557;25553;114105;24451;24648;29143;64625	Dmbt1;Pgr;Srd5a1;Brca1;Abcb1a;C3;Esr1;Sstr1;Ramp2;Ldha;Bdh1;Kcnma1;Mmp9;Nos2;Wfdc1;Mmp14;Col1a1;Tek;Gria1;H2afz;Cxcl1;Tacr1;Tshb;Ccna2;Star;Slc6a4;Cxcl2;Hmox1;Serpina1;Grn;Bid
GO:1903034	regulation of response to wounding	35	263	0.000527249	0.0287981	25728;290326;25704;24498;25732;84387;25542;24232;24237;100911545;24392;289211;316842;295703;81743;29290;24310;84492;64546;305355;687536;25651;117029;113936;29366;25364;311374;500707;691992;50672;287526;290757;25083;316521;50654	Apoe;Pbk;Il2ra;Il6;Acp5;Pglyrp1;Ccl3;C3;C6;LOC100911545;Gja1;Fcgr2b;Metrnl;Serping1;Pde2a;Adora1;Ace;Tec;Il12b;Tlr10;Foxf1;Selp;Ccr5;Cpb2;Serpine2;Asic2;Duoxa1;Tc2n;Gp1ba;Ednrb;Serpinf1;F11;Adra2a;Vil1;Ctss
GO:0035150	regulation of tube size	22	135	0.000535904	0.0289561	29597;25728;24212;24310;24392;311167;83731;29290;24599;24807;24787;24886;25364;50672;24366;24367;29244;25083;288001;58812;25589;25553	P2ry2;Apoe;Atp1a2;Ace;Gja1;Smtnl1;Kcnma1;Adora1;Nos2;Tacr1;Sod2;Tbxas1;Asic2;Ednrb;Fgb;Fgg;Gch1;Adra2a;Kng1l1;Apln;Kdr;Slc6a4
GO:0010332	response to gamma radiation	12	50	0.000556819	0.0297661	245920;500987;287561;81503;79129;60665;499204;24787;25383;24770;24493;114105	Cxcl10;H2afx;Ccl7;Cxcl1;Cyba;Cxcl6;Ddias;Sod2;Apobec1;Ccl2;Il1a;Cxcl2
GO:0050801	ion homeostasis	58	514	0.000565327	0.0299028	29597;25728;89813;89788;29440;24832;25316;81869;24212;24213;25542;25503;24890;317170;245920;24392;289237;291437;79129;117596;306811;289596;100362384;83731;29290;170496;83567;24451;365901;498335;305236;301066;315190;100360087;113959;24807;117029;170824;25349;24787;24886;84007;24770;114105;83504;306009;117038;29292;287562;50672;301086;29571;113910;29452;288026;81503;689415;25589	P2ry2;Apoe;Pdk4;Gna15;Slc26a4;Thy1;Ms4a2;Gstm7;Atp1a2;Atp1a3;Ccl3;Ocm2;Esr1;Slc9a7;Cxcl10;Gja1;Slamf8;Lipg;Cyba;Atp6v1b2;Wnk2;Corin;LOC100362384;Kcnma1;Adora1;Lcn2;Mchr1;Hmox1;Gnat2;Cxcl13;Cxcl11;Ccr8;Upk3a;LOC100360087;C5ar1;Tacr1;Ccr5;Steap3;Scn2b;Sod2;Tbxas1;C3ar1;Ccl2;Cxcl2;Kl;Slc39a14;Mt3;Ftl1;Ccl12;Ednrb;Xcr1;Scn10a;Prnd;Epas1;Atp13a4;Cxcl1;Mt2A;Kdr
GO:0050778	positive regulation of immune response	36	275	0.000581556	0.0302079	114203;317676;362634;361689;498075;24832;84387;24232;688090;24237;100911545;79126;293783;304988;295703;84492;498840;64546;501854;294257;56822;305355;113959;291100;58949;312705;117512;84007;298566;29687;83781;24988;685692;192262;499926;406161	Sh2b2;Lat2;C1qc;Unc93b1;Trat1;Thy1;Pglyrp1;C3;RT1-Bb;C6;LOC100911545;Cfi;Lpxn;Mnda;Serping1;Tec;Tmem173;Il12b;Rab7b;Cfb;Cd86;Tlr10;C5ar1;Irf4;Ptafr;C1r;C9;C3ar1;C1qa;C1qb;Lgals3;RT1-M2;Gcsam;C1s;Bpifb1;C4b
GO:0002685	regulation of leukocyte migration	17	91	0.000583118	0.0302079	498335;245920;84007;56765;287561;24807;83781;25542;25651;24770;685692;25544;116637;29427;29290;24493;81687	Cxcl13;Cxcl10;C3ar1;Plvap;Ccl7;Tacr1;Lgals3;Ccl3;Selp;Ccl2;Gcsam;Sele;Ccl4;Aif1;Adora1;Il1a;Mmp9
GO:0071548	response to dexamethasone	11	43	0.000594708	0.0304939	24498;140939;287526;24950;24770;25453;25557;170913;29221;24599;24310	Il6;Trim63;Serpinf1;Srd5a1;Ccl2;Gdnf;Star;Abcb1a;Arg1;Nos2;Ace
GO:0030334	regulation of cell migration	50	427	0.000625061	0.0317266	29597;24807;25728;25154;24832;293118;25544;116637;25542;24493;29427;81687;245920;60582;170897;84032;24482;29610;116510;29290;24310;81707;29393;498335;89804;56765;116680;25732;687536;25651;117029;25425;363060;84397;29186;24770;25694;83516;84007;287561;83781;287526;117264;25083;685692;367166;140586;309523;25589;316521	P2ry2;Tacr1;Apoe;Pgr;Thy1;Prcp;Sele;Ccl4;Ccl3;Il1a;Aif1;Mmp9;Cxcl10;Il1rn;Sphk1;Col3a1;Igf1;Tgfbr3;Timp1;Adora1;Ace;Mmp14;Col1a1;Cxcl13;Tek;Plvap;Ptpru;Acp5;Foxf1;Selp;Ccr5;Ctsh;Plet1;Tnfaip6;Cd63;Ccl2;Has2;Ppargc1a;C3ar1;Ccl7;Lgals3;Serpinf1;P2ry6;Adra2a;Gcsam;Hyal1;Sox9;Kif20b;Kdr;Vil1
GO:0036314	response to sterol	8	23	0.000631495	0.0317326	25728;25732;117029;29200;29637;83791;25542;315215	Apoe;Acp5;Ccr5;Inhba;Hmgcs1;Fdps;Ccl3;Mlc1
GO:0001816	cytokine production	48	407	0.000688347	0.0341213	362076;29597;25350;292060;170897;499342;500590;305253;25316;24498;113901;116637;360918;84387;25542;24232;24493;58949;353218;117092;289211;299206;24770;24451;498840;64546;501854;89804;303666;89824;305355;65161;291100;25732;117029;171569;361226;60350;301229;25572;84007;691998;60665;25083;497672;679787;65171;25627	Il36b;P2ry2;Sftpd;Irf8;Sphk1;Cd274;Tnfrsf9;Adamts3;Ms4a2;Il6;Chia;Ccl4;Pf4;Pglyrp1;Ccl3;C3;Il1a;Ptafr;Tnfsf9;Serpinb7;Fcgr2b;Batf;Ccl2;Hmox1;Tmem173;Il12b;Rab7b;Tek;RGD1561778;Chi3l1;Tlr10;Litaf;Irf4;Acp5;Ccr5;Spon2;Cd83;Cd14;Trem1;Tnfrsf4;C3ar1;Nlrp1b;Cxcl6;Adra2a;Brca1;Clec5a;Scamp5;Cma1
GO:0000278	mitotic cell cycle	55	485	0.000692612	0.0341213	171576;304477;170897;500545;297594;54237;689399;117524;171529;25203;301701;170913;308768;360161;24571;310621;24649;24493;296344;171304;246118;315298;311325;296368;114482;298850;29427;294074;684771;360243;64515;311546;114494;314818;29200;298884;315852;363227;24482;25515;83620;361416;360621;288272;311336;296137;294286;291441;304951;64041;306575;362720;309523;64625;315330	Bub1b;Kntc1;Sphk1;Cdca8;Cdca3;Cdk1;Cenpw;Ccnf;Kif2c;Ccnb1;Ndc80;Abcb1a;Ticrr;Nek6;Muc1;Iqgap3;Pim1;Il1a;Mybl2;Kif11;Tubb3;Racgap1;Knstrn;Ube2c;Nek2;Cenpa;Aif1;Cep55;Cdca5;Top2a;Cdc20;Tpx2;Ccna2;E2f7;Inhba;Gen1;Ttk;Nabp1;Igf1;Plk1;Cit;Cenpn;Cdc6;Mis18a;Nusap1;Bub1;Kifc1;Ska1;Nuf2;Birc5;Ckap2;Rrm2;Kif20b;Bid;Espl1
GO:0050900	leukocyte migration	26	177	0.000726827	0.0353144	25544;116637;25542;24493;81687;245920;81503;29427;498335;305236;56765;25651;113959;24807;117029;29290;24770;114105;301229;287562;50672;84007;287561;83781;360918;685692	Sele;Ccl4;Ccl3;Il1a;Mmp9;Cxcl10;Cxcl1;Aif1;Cxcl13;Cxcl11;Plvap;Selp;C5ar1;Tacr1;Ccr5;Adora1;Ccl2;Cxcl2;Trem1;Ccl12;Ednrb;C3ar1;Ccl7;Lgals3;Pf4;Gcsam
GO:0010212	response to ionizing radiation	20	120	0.000730884	0.0353144	245920;79129;289777;24464;81503;287561;60665;117029;363227;25557;499204;24787;25383;500987;497672;24770;308768;24493;114105;499870	Cxcl10;Cyba;Fignl1;Hp;Cxcl1;Ccl7;Cxcl6;Ccr5;Nabp1;Star;Ddias;Sod2;Apobec1;H2afx;Brca1;Ccl2;Ticrr;Il1a;Cxcl2;Rad51
GO:0055065	metal ion homeostasis	48	409	0.000756415	0.0361999	29597;25728;89788;24832;25316;24212;24213;25542;25503;24890;245920;24392;81503;79129;81869;289596;100362384;83731;29290;170496;83567;24451;365901;498335;305236;301066;315190;100360087;113959;24807;117029;170824;24787;84007;24770;114105;83504;306009;117038;29292;287562;50672;301086;113910;29452;288026;689415;25589	P2ry2;Apoe;Gna15;Thy1;Ms4a2;Atp1a2;Atp1a3;Ccl3;Ocm2;Esr1;Cxcl10;Gja1;Cxcl1;Cyba;Gstm7;Corin;LOC100362384;Kcnma1;Adora1;Lcn2;Mchr1;Hmox1;Gnat2;Cxcl13;Cxcl11;Ccr8;Upk3a;LOC100360087;C5ar1;Tacr1;Ccr5;Steap3;Sod2;C3ar1;Ccl2;Cxcl2;Kl;Slc39a14;Mt3;Ftl1;Ccl12;Ednrb;Xcr1;Prnd;Epas1;Atp13a4;Mt2A;Kdr
GO:0009636	response to toxic substance	25	168	0.000770307	0.0365169	24834;170913;54237;24950;24498;116637;25203;25542;298340;117099;81869;54246;24770;170496;50592;25557;25349;691657;25553;29221;310392;25515;83783;367166;689415	Tk1;Abcb1a;Cdk1;Srd5a1;Il6;Ccl4;Ccnb1;Ccl3;Slc6a14;Bdh1;Gstm7;Cyp2f4;Ccl2;Lcn2;Gria1;Star;Scn2b;Crip1;Slc6a4;Arg1;Slc7a11;Plk1;Sult1a1;Hyal1;Mt2A
GO:0040017	positive regulation of locomotion	35	270	0.000801374	0.0376346	29597;24807;25154;25544;116637;25542;24493;81687;245920;170897;24482;29427;25425;81707;29393;498335;89804;56765;25651;687536;25732;117029;363060;84397;24770;25694;84007;287561;83781;117264;25083;367166;140586;25589;316521	P2ry2;Tacr1;Pgr;Sele;Ccl4;Ccl3;Il1a;Mmp9;Cxcl10;Sphk1;Igf1;Aif1;Ctsh;Mmp14;Col1a1;Cxcl13;Tek;Plvap;Selp;Foxf1;Acp5;Ccr5;Plet1;Tnfaip6;Ccl2;Has2;C3ar1;Ccl7;Lgals3;P2ry6;Adra2a;Hyal1;Sox9;Kdr;Vil1
GO:0031667	response to nutrient levels	50	433	0.000823067	0.0382955	25728;170897;298282;24834;170913;24950;24953;24498;296654;497672;25027;24493;25033;81687;245920;100911545;25375;60582;89813;291437;79129;24795;117099;24778;24614;24533;29637;24770;24773;170496;24599;24451;29393;294257;116640;25732;25653;25557;24787;25553;24310;29221;24482;113976;117038;83516;114097;24464;66021;308100	Apoe;Sphk1;Oma1;Tk1;Abcb1a;Srd5a1;Gcgr;Il6;Gsn;Brca1;Slc16a1;Il1a;Sstr1;Mmp9;Cxcl10;LOC100911545;Aldh3a1;Il1rn;Pdk4;Lipg;Cyba;Serpina3n;Bdh1;Slc2a1;Orm1;Ldha;Hmgcs1;Ccl2;Sftpa1;Lcn2;Nos2;Hmox1;Col1a1;Cfb;Tnc;Acp5;Tshb;Star;Sod2;Slc6a4;Ace;Arg1;Igf1;Acsl4;Mt3;Ppargc1a;Ltc4s;Hp;Cybb;Acat2
GO:0097028	dendritic cell differentiation	9	31	0.000867538	0.0399943	353218;366126;56822;291100;301227;297077;29168;299206;171411	Tnfsf9;Spi1;Cd86;Irf4;Trem2;Tmem176a;Ubd;Batf;Tmem176b
GO:1901654	response to ketone	24	160	0.000878605	0.0401363	25154;24834;24950;24498;83791;170913;25569;24232;364018;24310;170897;117099;29610;24770;24599;58966;140939;24807;191575;25453;25557;690050;29221;287526	Pgr;Tk1;Srd5a1;Il6;Fdps;Abcb1a;Trh;C3;Ncf2;Ace;Sphk1;Bdh1;Tgfbr3;Ccl2;Nos2;Ramp2;Trim63;Tacr1;Nme1;Gdnf;Star;Tpmt;Arg1;Serpinf1
GO:0033273	response to vitamin	19	113	0.000891636	0.0403646	245920;116640;170913;25732;296654;24795;24770;114097;24464;24614;24787;29637;25653;29393;29221;24773;24493;24599;81687	Cxcl10;Tnc;Abcb1a;Acp5;Gsn;Serpina3n;Ccl2;Ltc4s;Hp;Orm1;Sod2;Hmgcs1;Tshb;Col1a1;Arg1;Sftpa1;Il1a;Nos2;Mmp9
GO:0050878	regulation of body fluid levels	35	272	0.000899808	0.0403709	29597;25728;25059;25339;170913;24232;360918;306283;406864;79129;25694;295703;83731;29290;84492;287424;63997;24807;25651;191575;113936;29366;25364;310392;117512;24392;500707;691992;50672;24366;24367;290757;25083;81718;58812	P2ry2;Apoe;Hk2;Npr3;Abcb1a;C3;Pf4;Anxa8;Clic1;Cyba;Has2;Serping1;Kcnma1;Adora1;Tec;Aloxe3;Slc29a1;Tacr1;Selp;Nme1;Cpb2;Serpine2;Asic2;Slc7a11;C9;Gja1;Tc2n;Gp1ba;Ednrb;Fgb;Fgg;F11;Adra2a;Cdo1;Apln
GO:0008283	cell proliferation	124	1317	0.000951682	0.0423204	499342;311723;24498;679975;361232;24493;310621;245920;81726;360711;24392;29692;304988;29610;24962;29290;89804;362510;191575;25453;29200;24787;307126;289054;25694;50672;83781;81639;58812;25589;292301;309304;367166;25350;25728;170897;24834;500590;54237;117254;64041;25203;64515;291675;306636;25375;117092;79129;24770;29639;25425;171112;56822;116680;24807;24883;64191;29221;287526;360918;362720;29143;1…	Cd274;Sox18;Il6;Gpr183;Pak1ip1;Il1a;Iqgap3;Cxcl10;Mvd;RGD1310335;Gja1;Pla2g2a;Mnda;Tgfbr3;Cth;Adora1;Tek;Melk;Nme1;Gdnf;Inhba;Sod2;Mcm10;Aspm;Has2;Ednrb;Lgals3;Alox15;Apln;Kdr;T;Pdcd1lg2;Hyal1;Sftpd;Apoe;Sphk1;Tk1;Tnfrsf9;Cdk1;Prdx1;Birc5;Ccnb1;Cdc20;Mzb1;Efnb2;Aldh3a1;Serpinb7;Cyba;Ccl2;Fxyd2;Ctsh;Wfdc1;Cd86;Ptpru;Tacr1;Wt1;Dhcr7;Arg1;Serpinf1;Pf4;Rrm2;Grn;Dmbt1;Fignl1;Mmp7;Npr3;Il2ra;Uhrf1;Lifr…
GO:0044236	multicellular organismal metabolic process	14	70	0.000970213	0.042766	305253;63849;117092;25335;298282;24770;24498;29221;29175;113898;29393;50654;81707;81687	Adamts3;Mmp8;Serpinb7;Mmp7;Oma1;Ccl2;Il6;Arg1;Ctsk;Prdx5;Col1a1;Ctss;Mmp14;Mmp9
GO:0051240	positive regulation of multicellular organismal process	56	505	0.000998252	0.0436193	362076;29597;81819;292060;170897;298282;54237;24498;113901;116637;497672;83791;25542;24232;24493;353218;117092;24392;360918;291437;311167;79129;300027;316842;29427;113898;24599;498840;64546;501854;155430;304334;117558;24807;117029;171569;361226;29200;113936;24886;24770;60350;24482;83504;25453;83516;50672;84007;24366;24367;24883;25083;140586;58812;25589;25203	Il36b;P2ry2;Pax8;Irf8;Sphk1;Oma1;Cdk1;Il6;Chia;Ccl4;Brca1;Fdps;Ccl3;C3;Il1a;Tnfsf9;Serpinb7;Gja1;Pf4;Lipg;Smtnl1;Cyba;Gpihbp1;Metrnl;Aif1;Prdx5;Nos2;Tmem173;Il12b;Rab7b;Hey2;Fam20c;Mylk2;Tacr1;Ccr5;Spon2;Cd83;Inhba;Cpb2;Tbxas1;Ccl2;Cd14;Igf1;Kl;Gdnf;Ppargc1a;Ednrb;C3ar1;Fgb;Fgg;Wt1;Adra2a;Sox9;Apln;Kdr;Ccnb1
GO:0048247	lymphocyte chemotaxis	7	19	0.00104734	0.0451529	498335;305236;245920;287561;116637;25542;24770	Cxcl13;Cxcl11;Cxcl10;Ccl7;Ccl4;Ccl3;Ccl2
GO:0022402	cell cycle process	70	668	0.00105132	0.0451529	294074;171576;680280;500545;297594;54237;689399;245918;117524;171529;25203;301701;170913;58835;360161;308768;24571;64515;24649;24493;296344;171304;246118;315298;310344;296368;114482;298850;29427;310621;289993;64041;64546;684771;360243;500987;315852;311546;289747;498709;114494;314818;29200;361416;304477;298884;289054;360621;311336;363227;24482;25515;83620;502372;404640;308064;292206;296137;294286;…	Cep55;Bub1b;Gas2l3;Cdca8;Cdca3;Cdk1;Cenpw;Cgref1;Ccnf;Kif2c;Ccnb1;Ndc80;Abcb1a;Phgdh;Nek6;Ticrr;Muc1;Cdc20;Pim1;Il1a;Mybl2;Kif11;Tubb3;Racgap1;Plk4;Ube2c;Nek2;Cenpa;Aif1;Iqgap3;Cdkn3;Birc5;Il12b;Cdca5;Top2a;H2afx;Ttk;Tpx2;Osm;Cks2;Ccna2;E2f7;Inhba;Cenpn;Kntc1;Gen1;Aspm;Cdc6;Nusap1;Nabp1;Igf1;Plk1;Cit;Syce1;Mrgprx2;Cep72;Trip13;Bub1;Kifc1;Ska1;Nuf2;Ddias;Ckap2;Sox9;Brca1;Kif20b;Knstrn;Bid;Mis18a;E…
GO:0042127	regulation of cell proliferation	103	1065	0.00111242	0.0473721	499342;24498;679975;24493;310621;245920;81726;360711;24392;29692;304988;29610;24962;29290;191575;29200;24787;311723;289054;25694;50672;83781;81639;58812;25589;292301;309304;25350;25728;170897;500590;54237;64041;25203;64515;291675;306636;25375;117092;79129;24770;29639;25425;171112;56822;116680;24807;24883;64191;29221;287526;360918;362720;29143;25335;25339;25704;81680;117033;24890;81687;353218;8440…	Cd274;Il6;Gpr183;Il1a;Iqgap3;Cxcl10;Mvd;RGD1310335;Gja1;Pla2g2a;Mnda;Tgfbr3;Cth;Adora1;Nme1;Inhba;Sod2;Sox18;Aspm;Has2;Ednrb;Lgals3;Alox15;Apln;Kdr;T;Pdcd1lg2;Sftpd;Apoe;Sphk1;Tnfrsf9;Cdk1;Birc5;Ccnb1;Cdc20;Mzb1;Efnb2;Aldh3a1;Serpinb7;Cyba;Ccl2;Fxyd2;Ctsh;Wfdc1;Cd86;Ptpru;Tacr1;Wt1;Dhcr7;Arg1;Serpinf1;Pf4;Rrm2;Grn;Mmp7;Npr3;Il2ra;Lifr;Mmp12;Esr1;Mmp9;Tnfsf9;Gjb6;Acer2;Wnk2;Aif1;Hmox1;Ntrk2;Thy1;C…
GO:2000401	regulation of lymphocyte migration	8	26	0.0012212	0.0515675	498335;245920;287561;24770;685692;116637;25542;29427	Cxcl13;Cxcl10;Ccl7;Ccl2;Gcsam;Ccl4;Ccl3;Aif1
GO:0051704	multi-organism process	124	1330	0.00130721	0.0547395	29597;60566;24498;84387;502852;24493;24310;245920;361422;360711;286896;315298;24795;498840;498335;294257;360243;58966;65161;291100;60665;66015;29200;24787;289054;60350;83620;50672;24464;100365043;292301;64389;367166;170897;24834;641624;116637;83791;246074;24571;60582;691857;81503;360228;24770;24773;25425;56822;25732;680312;24807;171569;24883;100360977;29221;114105;113976;448830;289237;50692;67978…	P2ry2;Syt8;Il6;Pglyrp1;Cd207;Il1a;Ace;Cxcl10;Cotl1;RGD1310335;Sgpl1;Racgap1;Serpina3n;Tmem173;Cxcl13;Cfb;Top2a;Ramp2;Litaf;Irf4;Cxcl6;Adamts4;Inhba;Sod2;Aspm;Cd14;Cit;Ednrb;Hp;LOC100365043;T;Defb4;Hyal1;Sphk1;Tk1;Defb5;Ccl4;Fdps;Scd1;Muc1;Il1rn;Pygo1;Cxcl1;Wfdc21;Ccl2;Sftpa1;Ctsh;Cd86;Acp5;Hist1h2bk;Tacr1;Spon2;Wt1;LOC100360977;Arg1;Cxcl2;Acsl4;Ly96;Slamf8;Plaur;Clec5a;Grn;Lipe;Irf8;Mmp7;Adam1a;I…
GO:0019932	second-messenger-mediated signaling	23	156	0.00135955	0.0564606	317676;25728;170897;25054;116637;25542;171099;245920;25334;81743;24599;305236;498075;117029;301227;81511;24482;50672;360918;140586;689415;25589;366949	Lat2;Apoe;Sphk1;Ntrk2;Ccl4;Ccl3;Rasd2;Cxcl10;Bhlha15;Pde2a;Nos2;Cxcl11;Trat1;Ccr5;Trem2;Lat;Igf1;Ednrb;Pf4;Sox9;Mt2A;Kdr;Mafa
GO:0009612	response to mechanical stimulus	26	186	0.00137633	0.0566888	25054;24212;25203;316330;81687;245920;24392;84032;79129;81743;24770;24773;24599;81707;29393;116640;89824;25654;24807;116649;29366;25364;24482;24498;140586;29437	Ntrk2;Atp1a2;Ccnb1;Ankrd23;Mmp9;Cxcl10;Gja1;Col3a1;Cyba;Pde2a;Ccl2;Sftpa1;Nos2;Mmp14;Col1a1;Tnc;Chi3l1;Col11a1;Tacr1;Kcnj4;Serpine2;Asic2;Igf1;Il6;Sox9;Acta1
GO:2000145	regulation of cell motility	50	446	0.00145245	0.0584563	29597;24807;25728;25154;24832;293118;25544;116637;25542;24493;29427;81687;245920;60582;170897;84032;24482;29610;116510;29290;24310;81707;29393;498335;89804;56765;116680;25732;687536;25651;117029;25425;363060;84397;29186;24770;25694;83516;84007;287561;83781;287526;117264;25083;685692;367166;140586;309523;25589;316521	P2ry2;Tacr1;Apoe;Pgr;Thy1;Prcp;Sele;Ccl4;Ccl3;Il1a;Aif1;Mmp9;Cxcl10;Il1rn;Sphk1;Col3a1;Igf1;Tgfbr3;Timp1;Adora1;Ace;Mmp14;Col1a1;Cxcl13;Tek;Plvap;Ptpru;Acp5;Foxf1;Selp;Ccr5;Ctsh;Plet1;Tnfaip6;Cd63;Ccl2;Has2;Ppargc1a;C3ar1;Ccl7;Lgals3;Serpinf1;P2ry6;Adra2a;Gcsam;Hyal1;Sox9;Kif20b;Kdr;Vil1
GO:0045765	regulation of angiogenesis	23	157	0.0014647	0.0584563	170897;497672;24232;24493;25425;245920;292406;363265;24237;24451;89804;58966;89824;117029;292935;24770;81687;84007;287526;360918;367166;25589;25627	Sphk1;Brca1;C3;Il1a;Ctsh;Cxcl10;Thbs2;Col4a3;C6;Hmox1;Tek;Ramp2;Chi3l1;Ccr5;Htatip2;Ccl2;Mmp9;C3ar1;Serpinf1;Pf4;Hyal1;Kdr;Cma1
GO:0048285	organelle fission	41	346	0.00147781	0.0584563	171576;500545;297594;54237;689399;117524;171529;25203;360161;24493;296344;171304;246118;315298;311325;296368;294074;684771;360243;64515;311546;289747;498709;311336;361416;114482;289054;24482;25515;83620;502372;360621;288272;292206;294286;291441;304951;64041;309523;315330;499870	Bub1b;Cdca8;Cdca3;Cdk1;Cenpw;Ccnf;Kif2c;Ccnb1;Nek6;Il1a;Mybl2;Kif11;Tubb3;Racgap1;Knstrn;Ube2c;Cep55;Cdca5;Top2a;Cdc20;Tpx2;Osm;Cks2;Nusap1;Cenpn;Nek2;Aspm;Igf1;Plk1;Cit;Syce1;Cdc6;Mis18a;Trip13;Kifc1;Ska1;Nuf2;Birc5;Kif20b;Espl1;Rad51
GO:0019725	cellular homeostasis	60	561	0.00148075	0.0584563	29597;25728;25059;89788;287526;24832;25316;24498;24213;64041;25589;25542;25503;24890;117038;24310;245920;288026;24392;289237;81503;79129;63997;117596;100362384;83731;84007;29292;83567;365901;84491;498335;305236;25060;301066;84403;314386;100360087;113959;24807;117029;25557;113936;24886;24770;114105;113910;306009;50676;287562;50672;301086;100362805;24212;25083;81639;81869;689415;191575;25627	P2ry2;Apoe;Hk2;Gna15;Serpinf1;Thy1;Ms4a2;Il6;Atp1a3;Birc5;Kdr;Ccl3;Ocm2;Esr1;Mt3;Ace;Cxcl10;Atp13a4;Gja1;Slamf8;Cxcl1;Cyba;Slc29a1;Atp6v1b2;LOC100362384;Kcnma1;C3ar1;Ftl1;Mchr1;Gnat2;Qsox1;Cxcl13;Cxcl11;Hk3;Ccr8;Gjb6;Gpr68;LOC100360087;C5ar1;Tacr1;Ccr5;Star;Cpb2;Tbxas1;Ccl2;Cxcl2;Prnd;Slc39a14;Slc6a12;Ccl12;Ednrb;Xcr1;Txndc5;Atp1a2;Adra2a;Alox15;Gstm7;Mt2A;Nme1;Cma1
GO:0002444	myeloid leukocyte mediated immunity	11	49	0.00148852	0.0584563	317676;687536;25316;171569;60665;81511;301229;25542;24232;24451;24310	Lat2;Foxf1;Ms4a2;Spon2;Cxcl6;Lat;Trem1;Ccl3;C3;Hmox1;Ace
GO:0001570	vasculogenesis	12	57	0.00149244	0.0584563	89804;687536;58966;155430;286896;25054;24883;497979;311723;25589;292301;25694	Tek;Foxf1;Ramp2;Hey2;Sgpl1;Ntrk2;Wt1;Tmem100;Sox18;Kdr;T;Has2
GO:0070098	chemokine-mediated signaling pathway	9	34	0.00150067	0.0584563	245920;305236;685243;301066;301086;100124593;117029;301227;24770	Cxcl10;Cxcl11;Ackr4;Ccr8;Xcr1;Cxcr6;Ccr5;Trem2;Ccl2
GO:0008015	blood circulation	40	336	0.00154933	0.059867	29597;25728;289596;25339;24366;293118;24212;116637;364018;24310;24392;311167;79129;54242;315611;81743;83731;29290;24599;24451;58966;155430;24807;25349;24787;100360872;24886;25364;50672;84007;83783;29571;29244;29452;25083;288001;58812;24367;25589;25553	P2ry2;Apoe;Corin;Npr3;Fgb;Prcp;Atp1a2;Ccl4;Ncf2;Ace;Gja1;Smtnl1;Cyba;Cpa3;Scn4b;Pde2a;Kcnma1;Adora1;Nos2;Hmox1;Ramp2;Hey2;Tacr1;Scn2b;Sod2;Mcpt1l1;Tbxas1;Asic2;Ednrb;C3ar1;Sult1a1;Scn10a;Gch1;Epas1;Adra2a;Kng1l1;Apln;Fgg;Kdr;Slc6a4
GO:1902578	single-organism localization	233	2730	0.00156071	0.059867	29597;85497;81819;293650;499342;317676;293154;29599;24498;289054;289949;303772;24493;684984;245920;50719;24392;353250;29465;29695;140868;315298;315611;300027;362474;83731;85266;29290;29292;498840;365042;89804;24904;314386;191573;65161;117558;191575;25453;29200;60566;24770;298504;60350;362861;25694;50676;79217;25054;50672;25544;83781;83509;117264;81639;58812;366949;498638;25524;25350;287106;406864…	P2ry2;Klf15;Pax8;Tcirg1;Cd274;Lat2;Folr2;Atp2b3;Il6;Aspm;Fam3d;Slc16a6;Il1a;Cd300lg;Cxcl10;Slc7a5;Gja1;Niacr1;Trpv2;Gabrr2;Fabp5;Racgap1;Scn4b;Gpihbp1;Adhfe1;Kcnma1;Prss12;Adora1;Ftl1;Tmem173;Rab32;Tek;Slc22a1;Gpr68;Grin3a;Litaf;Mylk2;Nme1;Gdnf;Inhba;Syt8;Ccl2;Mfsd2a;Cd14;Slc41a2;Has2;Slc6a12;Gja3;Ntrk2;Ednrb;Sele;Lgals3;Slc7a7;P2ry6;Alox15;Apln;Mafa;Msr1;Psap;Sftpd;Prss30;Clic1;Rab7b;Kcnk2;Tnfrs…
GO:0048771	tissue remodeling	20	129	0.00159357	0.0606644	24498;64576;89813;50654;24848;25732;29452;304815;282836;24476;81651;81707;29221;29175;24482;24493;24599;24392;295691;81687	Il6;Ptprv;Pdk4;Ctss;Tph1;Acp5;Epas1;Elf3;Cthrc1;Iapp;Cspg4;Mmp14;Arg1;Ctsk;Igf1;Il1a;Nos2;Gja1;Frzb;Mmp9
GO:0003013	circulatory system process	40	337	0.00162662	0.061447	29597;25728;289596;25339;24366;293118;24212;116637;364018;24310;24392;311167;79129;54242;315611;81743;83731;29290;24599;24451;58966;155430;24807;25349;24787;100360872;24886;25364;50672;84007;83783;29571;29244;29452;25083;288001;58812;24367;25589;25553	P2ry2;Apoe;Corin;Npr3;Fgb;Prcp;Atp1a2;Ccl4;Ncf2;Ace;Gja1;Smtnl1;Cyba;Cpa3;Scn4b;Pde2a;Kcnma1;Adora1;Nos2;Hmox1;Ramp2;Hey2;Tacr1;Scn2b;Sod2;Mcpt1l1;Tbxas1;Asic2;Ednrb;C3ar1;Sult1a1;Scn10a;Gch1;Epas1;Adra2a;Kng1l1;Apln;Fgg;Kdr;Slc6a4
GO:0006811	ion transport	109	1154	0.00166601	0.061447	29597;293650;293154;29599;25027;24493;24310;245920;50719;24392;29465;29695;315298;315611;83731;29290;29292;58966;191573;25453;25349;298504;362861;50676;25753;83781;117264;288026;25728;406864;170899;25054;24832;314847;116637;117258;360539;60582;81503;79129;24778;24904;60338;24770;29639;317170;24777;84012;63848;50592;63843;50599;170824;29221;114511;116831;171049;365360;25334;192213;84396;24212;2421…	P2ry2;Tcirg1;Folr2;Atp2b3;Slc16a1;Il1a;Ace;Cxcl10;Slc7a5;Gja1;Trpv2;Gabrr2;Racgap1;Scn4b;Kcnma1;Adora1;Ftl1;Ramp2;Grin3a;Gdnf;Scn2b;Mfsd2a;Slc41a2;Slc6a12;Chrng;Lgals3;P2ry6;Atp13a4;Apoe;Clic1;Kcnk2;Ntrk2;Thy1;Best3;Ccl4;Cntn1;Slc47a1;Il1rn;Cxcl1;Cyba;Slc2a1;Slc22a1;Fxyd5;Ccl2;Fxyd2;Slc9a7;Slc10a1;Slc1a6;Fxyd7;Gria1;P2ry4;Kcnj3;Steap3;Arg1;Emb;Fxyd3;Folr1;Tmc5;Bhlha15;Rasgrf1;Atp1b4;Atp1a2;Atp1a3…
GO:0048584	positive regulation of response to stimulus	109	1154	0.00166601	0.061447	317676;24498;679975;84387;24493;310621;245920;24392;304988;29610;24962;29290;84492;498840;498335;305253;65161;291100;287885;312705;289054;289229;29687;83781;81639;296137;58814;25589;499926;114203;25524;362634;361689;501854;25054;24832;24366;364754;116637;24988;290361;688090;100911545;60582;293783;84032;81743;24770;24310;56822;89824;311426;170824;81511;691993;361514;448830;298566;24367;360918;2942…	Lat2;Il6;Gpr183;Pglyrp1;Il1a;Iqgap3;Cxcl10;Gja1;Mnda;Tgfbr3;Cth;Adora1;Tec;Tmem173;Cxcl13;Adamts3;Litaf;Irf4;Sectm1a;C1r;Aspm;Vangl2;C1qb;Lgals3;Alox15;Bub1;Tmod2;Kdr;Bpifb1;Sh2b2;Psap;C1qc;Unc93b1;Rab7b;Ntrk2;Thy1;Fgb;Fzd8;Ccl4;RT1-M2;Dok2;RT1-Bb;LOC100911545;Il1rn;Lpxn;Col3a1;Pde2a;Ccl2;Ace;Cd86;Chi3l1;Siglec1;Steap3;Lat;Scimp;Meis3;Ly96;C1qa;Fgg;Pf4;Cfb;Mt3;Ccl3;Nek6;Esr1;Ctsh;Rasgrf1;Serping1…
GO:0019731	antibacterial humoral response	7	21	0.00168177	0.061447	361247;25335;680312;100910200;171569;100365043;64647	Hist1h2bd;Mmp7;Hist1h2bk;LOC100910200;Spon2;LOC100365043;Hist1h2bl
GO:0001525	angiogenesis	37	305	0.00168858	0.061447	170897;24832;293118;364754;497672;24232;24493;24237;245920;367166;292406;363265;24310;24451;81707;89804;58966;89824;117029;25425;314818;497979;292935;311723;24770;81687;287562;84007;366126;287526;29452;360918;306636;64536;81651;25589;25627	Sphk1;Thy1;Prcp;Fzd8;Brca1;C3;Il1a;C6;Cxcl10;Hyal1;Thbs2;Col4a3;Ace;Hmox1;Mmp14;Tek;Ramp2;Chi3l1;Ccr5;Ctsh;E2f7;Tmem100;Htatip2;Sox18;Ccl2;Mmp9;Ccl12;C3ar1;Spi1;Serpinf1;Epas1;Pf4;Efnb2;Esm1;Cspg4;Kdr;Cma1
GO:2000501	regulation of natural killer cell chemotaxis	4	5	0.00169997	0.061447	24770;116637;25542;287561	Ccl2;Ccl4;Ccl3;Ccl7
GO:0035747	natural killer cell chemotaxis	4	5	0.00169997	0.061447	24770;116637;25542;287561	Ccl2;Ccl4;Ccl3;Ccl7
GO:0008608	attachment of spindle microtubules to kinetochore	6	15	0.00171196	0.061447	315298;311325;114482;311327;25203;301701	Racgap1;Knstrn;Nek2;Casc5;Ccnb1;Ndc80
GO:0016126	sterol biosynthetic process	9	35	0.00177935	0.062526	81726;25728;89784;140910;29637;83791;64191;365345;25427	Mvd;Apoe;Idi1;Msmo1;Hmgcs1;Fdps;Dhcr7;Cyb5r2;Cyp51
GO:0071549	cellular response to dexamethasone stimulus	9	35	0.00177935	0.062526	24498;140939;287526;24950;24770;25453;25557;170913;29221	Il6;Trim63;Serpinf1;Srd5a1;Ccl2;Gdnf;Star;Abcb1a;Arg1
GO:0042743	hydrogen peroxide metabolic process	9	35	0.00177935	0.062526	79129;266807;117254;24464;24787;100363502;66021;113898;311374	Cyba;Duox1;Prdx1;Hp;Sod2;LOC100363502;Cybb;Prdx5;Duoxa1
GO:0032355	response to estradiol	22	150	0.00180756	0.0630763	24950;497672;170913;24232;24890;25033;58966;81503;117099;81687;24599;171112;29393;50592;58940;24807;114494;25553;114105;24648;29143;64625	Srd5a1;Brca1;Abcb1a;C3;Esr1;Sstr1;Ramp2;Cxcl1;Bdh1;Mmp9;Nos2;Wfdc1;Col1a1;Gria1;H2afz;Tacr1;Ccna2;Slc6a4;Cxcl2;Serpina1;Grn;Bid
GO:0014823	response to activity	13	67	0.00183763	0.0636836	60582;83783;311167;54237;24950;25557;316842;24787;24770;83516;24599;24482;364018	Il1rn;Sult1a1;Smtnl1;Cdk1;Srd5a1;Star;Metrnl;Sod2;Ccl2;Ppargc1a;Nos2;Igf1;Ncf2
GO:0048870	cell motility	83	841	0.00189473	0.0647687	29597;24807;25728;25154;114122;25054;24832;117551;293118;25544;116637;360918;301229;25542;24493;287562;81687;245920;685692;117033;60582;24392;286896;81503;25425;84032;24770;360579;81651;170897;24482;688605;306748;29610;60665;116510;29290;24310;65048;81707;29393;64546;305236;89804;56765;306071;116680;25732;113959;687536;25651;363060;25453;25589;304913;117029;84397;29186;289054;117232;311723;114105…	P2ry2;Tacr1;Apoe;Pgr;Vcan;Ntrk2;Thy1;Ccl22;Prcp;Sele;Ccl4;Pf4;Trem1;Ccl3;Il1a;Ccl12;Mmp9;Cxcl10;Gcsam;Mmp12;Il1rn;Gja1;Sgpl1;Cxcl1;Ctsh;Col3a1;Ccl2;Ccl9;Cspg4;Sphk1;Igf1;Ccl1;Cxcl14;Tgfbr3;Cxcl6;Timp1;Adora1;Ace;Fat2;Mmp14;Col1a1;Il12b;Cxcl11;Tek;Plvap;Lcp1;Ptpru;Acp5;C5ar1;Foxf1;Selp;Plet1;Gdnf;Kdr;Tnn;Ccr5;Tnfaip6;Cd63;Aspm;Barhl1;Sox18;Cxcl2;Has2;RGD1307443;Wt1;Aif1;Ppargc1a;Ednrb;C3ar1;Ccl7;L…
GO:0051674	localization of cell	83	841	0.00189473	0.0647687	29597;24807;25728;25154;114122;25054;24832;117551;293118;25544;116637;360918;301229;25542;24493;287562;81687;245920;685692;117033;60582;24392;286896;81503;25425;84032;24770;360579;81651;170897;24482;688605;306748;29610;60665;116510;29290;24310;65048;81707;29393;64546;305236;89804;56765;306071;116680;25732;113959;687536;25651;363060;25453;25589;304913;117029;84397;29186;289054;117232;311723;114105…	P2ry2;Tacr1;Apoe;Pgr;Vcan;Ntrk2;Thy1;Ccl22;Prcp;Sele;Ccl4;Pf4;Trem1;Ccl3;Il1a;Ccl12;Mmp9;Cxcl10;Gcsam;Mmp12;Il1rn;Gja1;Sgpl1;Cxcl1;Ctsh;Col3a1;Ccl2;Ccl9;Cspg4;Sphk1;Igf1;Ccl1;Cxcl14;Tgfbr3;Cxcl6;Timp1;Adora1;Ace;Fat2;Mmp14;Col1a1;Il12b;Cxcl11;Tek;Plvap;Lcp1;Ptpru;Acp5;C5ar1;Foxf1;Selp;Plet1;Gdnf;Kdr;Tnn;Ccr5;Tnfaip6;Cd63;Aspm;Barhl1;Sox18;Cxcl2;Has2;RGD1307443;Wt1;Aif1;Ppargc1a;Ednrb;C3ar1;Ccl7;L…
GO:0032101	regulation of response to external stimulus	47	419	0.00194677	0.066098	498335;25728;290326;25704;24498;116637;25732;84387;25542;24232;29427;117038;24237;245920;100911545;24392;289211;316842;24770;295703;81743;29290;24310;84492;498840;64546;191573;305355;687536;25651;117029;113936;29366;25364;311374;500707;691992;50672;84007;287561;448830;287526;60665;290757;306636;25589;50654	Cxcl13;Apoe;Pbk;Il2ra;Il6;Ccl4;Acp5;Pglyrp1;Ccl3;C3;Aif1;Mt3;C6;Cxcl10;LOC100911545;Gja1;Fcgr2b;Metrnl;Ccl2;Serping1;Pde2a;Adora1;Ace;Tec;Tmem173;Il12b;Grin3a;Tlr10;Foxf1;Selp;Ccr5;Cpb2;Serpine2;Asic2;Duoxa1;Tc2n;Gp1ba;Ednrb;C3ar1;Ccl7;Ly96;Serpinf1;Cxcl6;F11;Efnb2;Kdr;Ctss
GO:0050830	defense response to Gram-positive bacterium	11	51	0.00196004	0.0661019	361247;25335;100910200;113959;25732;24498;100365043;84387;246074;680312;64647	Hist1h2bd;Mmp7;LOC100910200;C5ar1;Acp5;Il6;LOC100365043;Pglyrp1;Scd1;Hist1h2bk;Hist1h2bl
GO:0051270	regulation of cellular component movement	54	500	0.00203142	0.0680527	29597;24807;25728;25154;24832;293118;24212;25544;116637;25542;24493;29427;81687;245920;60582;170897;84032;24482;315611;29610;116510;29290;24310;81707;29393;498335;89804;117558;56765;116680;25732;687536;25651;117029;25425;25349;363060;84397;29186;24770;25694;83516;84007;287561;83781;287526;117264;25083;685692;367166;140586;309523;25589;316521	P2ry2;Tacr1;Apoe;Pgr;Thy1;Prcp;Atp1a2;Sele;Ccl4;Ccl3;Il1a;Aif1;Mmp9;Cxcl10;Il1rn;Sphk1;Col3a1;Igf1;Scn4b;Tgfbr3;Timp1;Adora1;Ace;Mmp14;Col1a1;Cxcl13;Tek;Mylk2;Plvap;Ptpru;Acp5;Foxf1;Selp;Ccr5;Ctsh;Scn2b;Plet1;Tnfaip6;Cd63;Ccl2;Has2;Ppargc1a;C3ar1;Ccl7;Lgals3;Serpinf1;P2ry6;Adra2a;Gcsam;Hyal1;Sox9;Kif20b;Kdr;Vil1
GO:0051049	regulation of transport	112	1200	0.00207392	0.0690162	29597;81819;499342;24498;113901;315215;24493;24310;245920;24392;353250;29465;81869;83731;29290;498840;360034;89804;314386;65161;117558;25453;29200;60350;29639;50672;83781;81639;58812;25350;25728;406864;500590;54237;117254;314847;116637;117258;291675;306071;60582;81503;79129;81743;24770;24773;63848;24807;50599;100360977;29221;26989;24366;24367;24832;679787;65171;65178;289949;25544;65199;25542;2489…	P2ry2;Pax8;Cd274;Il6;Chia;Mlc1;Il1a;Ace;Cxcl10;Gja1;Niacr1;Trpv2;Gstm7;Kcnma1;Adora1;Tmem173;Myrip;Tek;Gpr68;Litaf;Mylk2;Gdnf;Inhba;Cd14;Fxyd2;Ednrb;Lgals3;Alox15;Apln;Sftpd;Apoe;Clic1;Tnfrsf9;Cdk1;Prdx1;Best3;Ccl4;Cntn1;Mzb1;Lcp1;Il1rn;Cxcl1;Cyba;Pde2a;Ccl2;Sftpa1;Fxyd7;Tacr1;Kcnj3;LOC100360977;Arg1;Cadps;Fgb;Fgg;Thy1;Clec5a;Scamp5;Snap91;Fam3d;Sele;Kcnip3;Ccl3;Esr1;Mmp9;Hk2;Scn4b;Rasgrf1;Prom2;…
GO:0008217	regulation of blood pressure	22	153	0.00225135	0.0744279	289596;25339;293118;24212;364018;24310;24392;79129;54242;29290;24599;24451;58966;24807;24787;100360872;25364;50672;84007;83783;29244;58812	Corin;Npr3;Prcp;Atp1a2;Ncf2;Ace;Gja1;Cyba;Cpa3;Adora1;Nos2;Hmox1;Ramp2;Tacr1;Sod2;Mcpt1l1;Asic2;Ednrb;C3ar1;Sult1a1;Gch1;Apln
GO:0002683	negative regulation of immune system process	26	194	0.00232383	0.0763218	499342;25350;24832;25704;84387;685692;289211;293783;84032;304988;295703;29290;24451;64546;501854;687536;498275;56822;100911545;291100;24770;83781;81639;140586;499926;309304	Cd274;Sftpd;Thy1;Il2ra;Pglyrp1;Gcsam;Fcgr2b;Lpxn;Col3a1;Mnda;Serping1;Adora1;Hmox1;Il12b;Rab7b;Foxf1;Fcrlb;Cd86;LOC100911545;Irf4;Ccl2;Lgals3;Alox15;Sox9;Bpifb1;Pdcd1lg2
GO:0002443	leukocyte mediated immunity	28	215	0.00235541	0.0768567	317676;362634;25316;117254;60665;25542;24232;688090;25425;79126;289211;301229;295703;24237;24770;24310;24451;64546;687536;171569;24988;81511;117512;299206;298566;29687;192262;406161	Lat2;C1qc;Ms4a2;Prdx1;Cxcl6;Ccl3;C3;RT1-Bb;Ctsh;Cfi;Fcgr2b;Trem1;Serping1;C6;Ccl2;Ace;Hmox1;Il12b;Foxf1;Spon2;RT1-M2;Lat;C9;Batf;C1qa;C1qb;C1s;C4b
GO:0050714	positive regulation of protein secretion	15	87	0.00238673	0.0773764	499342;89804;60350;303666;24366;24367;117029;24498;113901;679787;65171;25542;100360977;24493;25572	Cd274;Tek;Cd14;RGD1561778;Fgb;Fgg;Ccr5;Il6;Chia;Clec5a;Scamp5;Ccl3;LOC100360977;Il1a;Tnfrsf4
GO:0060326	cell chemotaxis	22	154	0.0024184	0.0779004	116637;25542;245920;81503;360579;306748;29427;498335;305236;117551;113959;688605;24770;114105;301229;287562;50672;84007;287561;83781;60665;360918	Ccl4;Ccl3;Cxcl10;Cxcl1;Ccl9;Cxcl14;Aif1;Cxcl13;Cxcl11;Ccl22;C5ar1;Ccl1;Ccl2;Cxcl2;Trem1;Ccl12;Ednrb;C3ar1;Ccl7;Lgals3;Cxcl6;Pf4
GO:0042312	regulation of vasodilation	9	37	0.00246024	0.0787434	29597;24392;311167;25083;58812;83731;25589;29290;24599	P2ry2;Gja1;Smtnl1;Adra2a;Apln;Kcnma1;Kdr;Adora1;Nos2
GO:0044765	single-organism transport	220	2591	0.00254322	0.0808841	29597;85497;81819;293650;499342;317676;293154;29599;24498;113901;289949;303772;24493;684984;245920;50719;24392;353250;29465;29695;140868;315298;315611;300027;362474;83731;85266;29290;29292;498840;365042;89804;24904;314386;191573;65161;117558;191575;25453;29200;60566;24770;298504;60350;362861;25694;50676;79217;50672;25544;83781;117264;81639;58812;366949;498638;25524;25350;25728;406864;501854;17089…	P2ry2;Klf15;Pax8;Tcirg1;Cd274;Lat2;Folr2;Atp2b3;Il6;Chia;Fam3d;Slc16a6;Il1a;Cd300lg;Cxcl10;Slc7a5;Gja1;Niacr1;Trpv2;Gabrr2;Fabp5;Racgap1;Scn4b;Gpihbp1;Adhfe1;Kcnma1;Prss12;Adora1;Ftl1;Tmem173;Rab32;Tek;Slc22a1;Gpr68;Grin3a;Litaf;Mylk2;Nme1;Gdnf;Inhba;Syt8;Ccl2;Mfsd2a;Cd14;Slc41a2;Has2;Slc6a12;Gja3;Ednrb;Sele;Lgals3;P2ry6;Alox15;Apln;Mafa;Msr1;Psap;Sftpd;Apoe;Clic1;Rab7b;Kcnk2;Tnfrsf9;Cdk1;Slc43a3…
GO:0010573	vascular endothelial growth factor production	7	23	0.00258025	0.0809625	305253;84007;24498;497672;24770;24232;24493	Adamts3;C3ar1;Il6;Brca1;Ccl2;C3;Il1a
GO:0065004	protein-DNA complex assembly	16	97	0.00258694	0.0809625	291145;361416;680097;294071;155430;291159;680522;689399;304648;140586;25448;298850;100360950;288242;100912290;288272	Hist1h1a;Cenpn;LOC680097;Hells;Hey2;Hist1h2ail;Hist1h1b;Cenpw;Asf1b;Sox9;Cenpi;Cenpa;LOC100360950;Chaf1b;LOC100912290;Mis18a
GO:0014074	response to purine-containing compound	22	155	0.0025958	0.0809625	29597;170897;24950;24498;25375;304608;24533;24795;81869;29637;81743;24770;29393;89804;191575;24883;25557;25553;192262;266807;81718;114090	P2ry2;Sphk1;Srd5a1;Il6;Aldh3a1;Mmp19;Ldha;Serpina3n;Gstm7;Hmgcs1;Pde2a;Ccl2;Col1a1;Tek;Nme1;Wt1;Star;Slc6a4;C1s;Duox1;Cdo1;Egr2
GO:0002251	organ or tissue specific immune response	8	30	0.00261013	0.0809625	361247;680312;100910200;25046;24498;100365043;499926;64647	Hist1h2bd;Hist1h2bk;LOC100910200;Pigr;Il6;LOC100365043;Bpifb1;Hist1h2bl
GO:0097285	cell-type specific apoptotic process	43	381	0.00264584	0.0815665	81819;25728;25054;25704;24498;499204;65199;25542;81680;24890;364018;117232;353250;63865;363265;24451;64546;89804;58966;155430;308099;113959;117038;311426;117029;25453;25557;24787;24770;24482;25572;24883;24383;83516;24366;24367;83781;64041;140586;679787;100363502;25589;64625	Pax8;Apoe;Ntrk2;Il2ra;Il6;Ddias;Kcnip3;Ccl3;Lifr;Esr1;Ncf2;Barhl1;Niacr1;Lgmn;Col4a3;Hmox1;Il12b;Tek;Ramp2;Hey2;Fndc1;C5ar1;Mt3;Siglec1;Ccr5;Gdnf;Star;Sod2;Ccl2;Igf1;Tnfrsf4;Wt1;Gapdh;Ppargc1a;Fgb;Fgg;Lgals3;Birc5;Sox9;Clec5a;LOC100363502;Kdr;Bid
GO:0043129	surfactant homeostasis	5	11	0.00271558	0.083206	25589;25350;245977;29452;25425	Kdr;Sftpd;Gpr116;Epas1;Ctsh
GO:0050663	cytokine secretion	17	107	0.002741	0.0834597	499342;89804;60350;303666;25316;89824;305355;500590;117029;24498;113901;679787;65171;25542;24493;301229;25572	Cd274;Tek;Cd14;RGD1561778;Ms4a2;Chi3l1;Tlr10;Tnfrsf9;Ccr5;Il6;Chia;Clec5a;Scamp5;Ccl3;Il1a;Trem1;Tnfrsf4
GO:0040011	locomotion	95	1001	0.00275708	0.0834597	29597;24493;24310;245920;24392;286896;246118;29610;29290;498335;117551;301066;25453;304913;311723;289054;25694;50672;289229;83781;117264;306636;25589;685243;25728;170897;25054;24832;116637;306071;60582;81503;84032;306748;24770;81687;116720;56765;116680;25732;24807;24883;114105;291081;287526;360918;293118;24212;25544;25542;117033;25425;117232;29427;29393;361244;114122;113959;25651;363060;688605;83…	P2ry2;Il1a;Ace;Cxcl10;Gja1;Sgpl1;Tubb3;Tgfbr3;Adora1;Cxcl13;Ccl22;Ccr8;Gdnf;Tnn;Sox18;Aspm;Has2;Ednrb;Vangl2;Lgals3;P2ry6;Efnb2;Kdr;Ackr4;Apoe;Sphk1;Ntrk2;Thy1;Ccl4;Lcp1;Il1rn;Cxcl1;Col3a1;Cxcl14;Ccl2;Mmp9;Pik3c2g;Plvap;Ptpru;Acp5;Tacr1;Wt1;Cxcl2;Tubb2b;Serpinf1;Pf4;Prcp;Atp1a2;Sele;Ccl3;Mmp12;Ctsh;Barhl1;Aif1;Col1a1;RGD1307443;Vcan;C5ar1;Selp;Plet1;Ccl1;Ppargc1a;Trem1;C3ar1;Gcsam;Sox9;Cthrc1;Vil…
GO:0043011	myeloid dendritic cell differentiation	6	17	0.0028479	0.0856929	353218;366126;56822;291100;29168;299206	Tnfsf9;Spi1;Cd86;Irf4;Ubd;Batf
GO:0000819	sister chromatid segregation	12	63	0.00308935	0.0924047	83620;684771;360243;500545;294286;311325;114482;311336;171576;25203;315330;25515	Cit;Cdca5;Top2a;Cdca8;Kifc1;Knstrn;Nek2;Nusap1;Bub1b;Ccnb1;Espl1;Plk1
GO:0010817	regulation of hormone levels	42	374	0.00318276	0.0933722	289949;81819;289596;24950;24498;64041;246075;170913;25569;80900;24310;60582;24392;353250;286896;24890;54242;25017;81820;24904;83731;29290;360034;314386;24807;289747;170635;25557;29200;100360872;25027;24482;311374;59267;83516;83783;24367;266807;25083;24366;58812;366949	Fam3d;Pax8;Corin;Srd5a1;Il6;Birc5;Prlhr;Abcb1a;Trh;Slco1a5;Ace;Il1rn;Gja1;Niacr1;Sgpl1;Esr1;Cpa3;Myo5a;Doc2b;Slc22a1;Kcnma1;Adora1;Myrip;Gpr68;Tacr1;Osm;Dhrs9;Star;Inhba;Mcpt1l1;Slc16a1;Igf1;Duoxa1;Syt7;Ppargc1a;Sult1a1;Fgg;Duox1;Adra2a;Fgb;Apln;Mafa
GO:0046903	secretion	75	762	0.00318881	0.0933722	29597;317676;289949;81819;299339;25059;499342;25339;25054;24953;24498;113901;64041;365377;25316;170913;25569;24493;191575;24310;245920;353250;60582;24392;25335;25017;79129;170897;25542;60566;81820;289596;83731;85266;29290;291597;24451;687536;58812;360034;89804;500590;303666;26989;314386;89824;305355;289747;24807;117029;170824;29200;113936;81511;29366;100360977;25027;60350;301229;25572;113976;6845…	P2ry2;Lat2;Fam3d;Pax8;Tnfaip2;Hk2;Cd274;Npr3;Ntrk2;Gcgr;Il6;Chia;Birc5;Trim72;Ms4a2;Abcb1a;Trh;Il1a;Nme1;Ace;Cxcl10;Niacr1;Il1rn;Gja1;Mmp7;Myo5a;Cyba;Sphk1;Ccl3;Syt8;Doc2b;Corin;Kcnma1;Prss12;Adora1;Trim36;Hmox1;Foxf1;Apln;Myrip;Tek;Tnfrsf9;RGD1561778;Cadps;Gpr68;Chi3l1;Tlr10;Osm;Tacr1;Ccr5;Steap3;Inhba;Cpb2;Lat;Serpine2;LOC100360977;Slc16a1;Cd14;Trem1;Tnfrsf4;Acsl4;Kcnc4;Ccl12;Ednrb;Syt7;Fgg;Slc…
GO:0009266	response to temperature stimulus	20	138	0.00320055	0.0933722	245920;24787;60350;83516;29465;81503;289747;24807;24498;24464;316842;113936;79223;24770;29290;25569;24493;114105;26296;81687	Cxcl10;Sod2;Cd14;Ppargc1a;Trpv2;Cxcl1;Osm;Tacr1;Il6;Hp;Metrnl;Cpb2;Gk;Ccl2;Adora1;Trh;Il1a;Cxcl2;Tfec;Mmp9
GO:1901698	response to nitrogen compound	72	726	0.00320919	0.0933722	29597;85497;300691;25728;25154;114203;498840;54237;24950;24953;24498;64041;497672;83791;170913;24493;25017;304608;117038;81687;291675;25375;60582;24392;24533;114105;84032;79129;81718;24795;117099;81869;24614;300027;29637;81743;29427;24773;24451;29393;24191;89804;50592;116510;113959;81503;24807;191575;114494;24883;25557;301227;25383;25553;24770;29221;29168;310392;83504;24212;24383;83516;170897;192…	P2ry2;Klf15;Nnmt;Apoe;Pgr;Sh2b2;Tmem173;Cdk1;Srd5a1;Gcgr;Il6;Birc5;Brca1;Fdps;Abcb1a;Il1a;Myo5a;Mmp19;Mt3;Mmp9;Mzb1;Aldh3a1;Il1rn;Gja1;Ldha;Cxcl2;Col3a1;Cyba;Cdo1;Serpina3n;Bdh1;Gstm7;Orm1;Gpihbp1;Hmgcs1;Pde2a;Aif1;Sftpa1;Hmox1;Col1a1;Aldoc;Tek;Gria1;Timp1;C5ar1;Cxcl1;Tacr1;Nme1;Ccna2;Wt1;Star;Trem2;Apobec1;Slc6a4;Ccl2;Arg1;Ubd;Slc7a11;Kl;Atp1a2;Gapdh;Ppargc1a;Sphk1;C1s;Cyp2e1;Duox1;Gsn;Hp;Sox9;E…
GO:0010243	response to organonitrogen compound	68	678	0.00321461	0.0933722	29597;85497;300691;25728;25154;114203;54237;24950;24953;24498;64041;497672;83791;170913;24493;25017;304608;81687;291675;25375;60582;24392;24533;114105;84032;79129;81718;24795;117099;81869;24614;300027;29637;81743;29427;24451;29393;24191;89804;50592;116510;113959;81503;24807;191575;114494;24883;25557;301227;25383;25553;24770;29221;310392;83504;24212;29168;83516;170897;192262;25086;266807;296654;24…	P2ry2;Klf15;Nnmt;Apoe;Pgr;Sh2b2;Cdk1;Srd5a1;Gcgr;Il6;Birc5;Brca1;Fdps;Abcb1a;Il1a;Myo5a;Mmp19;Mmp9;Mzb1;Aldh3a1;Il1rn;Gja1;Ldha;Cxcl2;Col3a1;Cyba;Cdo1;Serpina3n;Bdh1;Gstm7;Orm1;Gpihbp1;Hmgcs1;Pde2a;Aif1;Hmox1;Col1a1;Aldoc;Tek;Gria1;Timp1;C5ar1;Cxcl1;Tacr1;Nme1;Ccna2;Wt1;Star;Trem2;Apobec1;Slc6a4;Ccl2;Arg1;Slc7a11;Kl;Atp1a2;Ubd;Ppargc1a;Sphk1;C1s;Cyp2e1;Duox1;Gsn;Hp;Sox9;Egr2;Pdk4;Rad51
GO:0030595	leukocyte chemotaxis	17	109	0.00324564	0.093732	498335;305236;287562;50672;84007;245920;81503;113959;287561;360918;116637;83781;25542;29427;24770;114105;301229	Cxcl13;Cxcl11;Ccl12;Ednrb;C3ar1;Cxcl10;Cxcl1;C5ar1;Ccl7;Pf4;Ccl4;Lgals3;Ccl3;Aif1;Ccl2;Cxcl2;Trem1
GO:0034341	response to interferon-gamma	11	55	0.0032665	0.0937952	64546;24383;56822;29168;29244;24795;24770;25557;25542;29427;688090	Il12b;Gapdh;Cd86;Ubd;Gch1;Serpina3n;Ccl2;Star;Ccl3;Aif1;RT1-Bb
GO:0072676	lymphocyte migration	9	39	0.00333283	0.095156	498335;305236;245920;287561;24770;685692;116637;25542;29427	Cxcl13;Cxcl11;Cxcl10;Ccl7;Ccl2;Gcsam;Ccl4;Ccl3;Aif1
GO:0048518	positive regulation of biological process	281	3412	0.00336618	0.0955652	29597;85497;81819;499342;298282;317676;24498;113901;84387;315215;24493;310621;245920;81726;291437;360711;24392;353250;29465;311167;315298;296368;24251;315611;304988;29610;24962;83731;29290;311374;84492;311336;498840;498335;54227;89804;360243;58966;314386;65161;291100;287885;362510;191575;25453;312705;24787;311723;289054;60350;25694;367166;25515;50672;289229;679975;29687;29455;117264;290757;192262…	P2ry2;Klf15;Pax8;Cd274;Oma1;Lat2;Il6;Chia;Pglyrp1;Mlc1;Il1a;Iqgap3;Cxcl10;Mvd;Lipg;RGD1310335;Gja1;Niacr1;Trpv2;Smtnl1;Racgap1;Ube2c;Cd53;Scn4b;Mnda;Tgfbr3;Cth;Kcnma1;Adora1;Duoxa1;Tec;Nusap1;Tmem173;Cxcl13;Arpc1b;Tek;Top2a;Ramp2;Gpr68;Litaf;Irf4;Sectm1a;Melk;Nme1;Gdnf;C1r;Sod2;Sox18;Aspm;Cd14;Has2;Hyal1;Plk1;Ednrb;Vangl2;Gpr183;C1qb;Gdf15;P2ry6;F11;C1s;Efnb2;Hp;Tmod2;Apln;Kdr;T;Mafa;Lgals3;Pdcd1…
GO:0006897	endocytosis	40	354	0.00355749	0.100255	499264;498638;294335;25350;292060;170568;100362805;293591;685243;25544;315215;24232;25728;79126;289211;289596;192211;65046;367074;85266;29427;24773;50592;58966;191575;171569;689388;29186;24770;60350;310693;83781;245955;81639;65171;29143;266714;65178;406161;54410	Apobr;Msr1;Susd2;Sftpd;Irf8;Dmbt1;Txndc5;Cd163l1;Ackr4;Sele;Mlc1;C3;Apoe;Cfi;Fcgr2b;Corin;Prom2;Ap2s1;Tmprss4;Prss12;Aif1;Sftpa1;Gria1;Ramp2;Nme1;Spon2;Ptx3;Cd63;Ccl2;Cd14;Cd5l;Lgals3;Lgals3bp;Alox15;Scamp5;Grn;Myo7a;Snap91;C4b;Enpp3
GO:0030574	collagen catabolic process	6	18	0.00359124	0.100255	63849;25335;29175;50654;81707;81687	Mmp8;Mmp7;Ctsk;Ctss;Mmp14;Mmp9
GO:0034508	centromere complex assembly	6	18	0.00359124	0.100255	361416;288272;689399;25448;298850;294071	Cenpn;Mis18a;Cenpw;Cenpi;Cenpa;Hells
GO:0046348	amino sugar catabolic process	5	12	0.00364342	0.100594	89824;113901;304860;683570;302972	Chi3l1;Chia;Npl;Gnpda1;Amdhd2
GO:0050665	hydrogen peroxide biosynthetic process	5	12	0.00364342	0.100594	24787;266807;79129;66021;100363502	Sod2;Duox1;Cyba;Cybb;LOC100363502
GO:0051602	response to electrical stimulus	11	56	0.00368329	0.101139	50592;84403;140939;24807;50599;24498;24464;24787;29427;60350;24482	Gria1;Gjb6;Trim63;Tacr1;Kcnj3;Il6;Hp;Sod2;Aif1;Cd14;Igf1
GO:0032870	cellular response to hormone stimulus	42	378	0.00377041	0.102969	114203;81819;25154;299210;24950;24953;24498;170913;116640;25569;24890;364018;58966;291675;89813;25017;24795;24614;29637;25033;29427;25425;50592;58940;117038;140939;24212;25453;25557;29200;25383;293118;24770;29221;83504;24883;83516;24366;287526;25083;114090;50654	Sh2b2;Pax8;Pgr;Esrrb;Srd5a1;Gcgr;Il6;Abcb1a;Tnc;Trh;Esr1;Ncf2;Ramp2;Mzb1;Pdk4;Myo5a;Serpina3n;Orm1;Hmgcs1;Sstr1;Aif1;Ctsh;Gria1;H2afz;Mt3;Trim63;Atp1a2;Gdnf;Star;Inhba;Apobec1;Prcp;Ccl2;Arg1;Kl;Wt1;Ppargc1a;Fgb;Serpinf1;Adra2a;Egr2;Ctss
GO:0019730	antimicrobial humoral response	7	25	0.00380781	0.103428	361247;25335;680312;100910200;171569;100365043;64647	Hist1h2bd;Mmp7;Hist1h2bk;LOC100910200;Spon2;LOC100365043;Hist1h2bl
GO:0000226	microtubule cytoskeleton organization	32	267	0.00388577	0.104978	300795;301701;114482;311325;64041;308761;25203;680280;315330;296344;171304;315298;310344;311327;298850;296846;84510;311546;361308;298884;289054;25027;25515;24383;308064;311336;294286;291441;117524;171529;306575;497672	Ns5atp9;Ndc80;Nek2;Knstrn;Birc5;Prc1;Ccnb1;Gas2l3;Espl1;Mybl2;Kif11;Racgap1;Plk4;Casc5;Cenpa;Hepacam2;Stmn2;Tpx2;Kif20a;Gen1;Aspm;Slc16a1;Plk1;Gapdh;Cep72;Nusap1;Kifc1;Ska1;Ccnf;Kif2c;Ckap2;Brca1
GO:0043269	regulation of ion transport	50	471	0.00391088	0.105092	29597;25728;406864;29366;24832;25316;684516;314847;116637;65199;25364;25569;24493;117258;81687;245920;259243;60582;24392;29465;81503;25017;79129;192213;24770;315611;306811;83731;29290;29639;24310;83567;305236;63848;116649;50599;25453;25349;29186;29221;24482;113976;116745;25542;83516;29571;83781;81869;116695;64120	P2ry2;Apoe;Clic1;Serpine2;Thy1;Ms4a2;Kcnc4;Best3;Ccl4;Kcnip3;Asic2;Trh;Il1a;Cntn1;Mmp9;Cxcl10;Kcnip4;Il1rn;Gja1;Trpv2;Cxcl1;Myo5a;Cyba;Rasgrf1;Ccl2;Scn4b;Wnk2;Kcnma1;Adora1;Fxyd2;Ace;Mchr1;Cxcl11;Fxyd7;Kcnj4;Kcnj3;Gdnf;Scn2b;Cd63;Arg1;Igf1;Acsl4;Kcnh6;Ccl3;Ppargc1a;Scn10a;Lgals3;Gstm7;Kcnd1;Kcnk13
GO:2000425	regulation of apoptotic cell clearance	4	7	0.00400861	0.107145	81639;24770;24232;406161	Alox15;Ccl2;C3;C4b
GO:0000070	mitotic sister chromatid segregation	11	57	0.00414147	0.109842	83620;684771;500545;294286;311325;114482;311336;171576;25203;315330;25515	Cit;Cdca5;Cdca8;Kifc1;Knstrn;Nek2;Nusap1;Bub1b;Ccnb1;Espl1;Plk1
GO:0040012	regulation of locomotion	52	496	0.00415322	0.109842	29597;24807;25728;25154;24832;293118;25544;116637;25542;24493;29427;81687;245920;685692;60582;170897;84032;24482;29610;116510;29290;24310;81707;29393;498335;89804;56765;116680;25732;687536;25651;117029;25425;363060;84397;29186;24770;25694;689388;83516;84007;287561;83781;287526;117264;25083;306636;367166;140586;309523;25589;316521	P2ry2;Tacr1;Apoe;Pgr;Thy1;Prcp;Sele;Ccl4;Ccl3;Il1a;Aif1;Mmp9;Cxcl10;Gcsam;Il1rn;Sphk1;Col3a1;Igf1;Tgfbr3;Timp1;Adora1;Ace;Mmp14;Col1a1;Cxcl13;Tek;Plvap;Ptpru;Acp5;Foxf1;Selp;Ccr5;Ctsh;Plet1;Tnfaip6;Cd63;Ccl2;Has2;Ptx3;Ppargc1a;C3ar1;Ccl7;Lgals3;Serpinf1;P2ry6;Adra2a;Efnb2;Hyal1;Sox9;Kif20b;Kdr;Vil1
GO:0051301	cell division	50	473	0.00421041	0.11061	171576;500545;297594;54237;689399;117524;171529;25203;360161;25686;24493;296344;171304;291885;246118;315298;311325;296368;499933;311336;294074;684771;360243;64515;311546;289747;498709;114494;314818;361416;114482;289054;360621;24482;25515;83620;502372;404640;288272;289229;292206;294286;291441;304951;64041;306575;305984;309523;315330;499870	Bub1b;Cdca8;Cdca3;Cdk1;Cenpw;Ccnf;Kif2c;Ccnb1;Nek6;Gnai1;Il1a;Mybl2;Kif11;Mcm5;Tubb3;Racgap1;Knstrn;Ube2c;Dsn1;Nusap1;Cep55;Cdca5;Top2a;Cdc20;Tpx2;Osm;Cks2;Ccna2;E2f7;Cenpn;Nek2;Aspm;Cdc6;Igf1;Plk1;Cit;Syce1;Mrgprx2;Mis18a;Vangl2;Trip13;Kifc1;Ska1;Nuf2;Birc5;Ckap2;Cdca2;Kif20b;Espl1;Rad51
GO:0001817	regulation of cytokine production	40	358	0.00422628	0.11061	362076;29597;25350;292060;170897;499342;500590;24498;113901;116637;360918;84387;25542;24232;24493;353218;117092;289211;24770;24451;498840;64546;501854;89804;303666;305355;65161;291100;25732;117029;171569;361226;60350;25572;84007;60665;25083;497672;679787;65171	Il36b;P2ry2;Sftpd;Irf8;Sphk1;Cd274;Tnfrsf9;Il6;Chia;Ccl4;Pf4;Pglyrp1;Ccl3;C3;Il1a;Tnfsf9;Serpinb7;Fcgr2b;Ccl2;Hmox1;Tmem173;Il12b;Rab7b;Tek;RGD1561778;Tlr10;Litaf;Irf4;Acp5;Ccr5;Spon2;Cd83;Cd14;Tnfrsf4;C3ar1;Cxcl6;Adra2a;Brca1;Clec5a;Scamp5
GO:0050727	regulation of inflammatory response	24	183	0.00425192	0.110704	25728;290326;25704;24498;84387;25542;24232;24310;100911545;289211;295703;316842;81743;29290;24237;64546;305355;687536;25732;117029;311374;50672;287526;50654	Apoe;Pbk;Il2ra;Il6;Pglyrp1;Ccl3;C3;Ace;LOC100911545;Fcgr2b;Serping1;Metrnl;Pde2a;Adora1;C6;Il12b;Tlr10;Foxf1;Acp5;Ccr5;Duoxa1;Ednrb;Serpinf1;Ctss
GO:0045766	positive regulation of angiogenesis	16	103	0.00435905	0.112908	89804;58966;170897;89824;117029;25425;367166;25627;24237;25589;84007;24232;24493;497672;24451;81687	Tek;Ramp2;Sphk1;Chi3l1;Ccr5;Ctsh;Hyal1;Cma1;C6;Kdr;C3ar1;C3;Il1a;Brca1;Hmox1;Mmp9
GO:0009268	response to pH	9	41	0.00443174	0.113428	24392;314386;287526;299242;367166;63865;83731;25364;79217	Gja1;Gpr68;Serpinf1;Gpr65;Hyal1;Lgmn;Kcnma1;Asic2;Gja3
GO:2000403	positive regulation of lymphocyte migration	6	19	0.00446939	0.113428	498335;245920;287561;116637;25542;29427	Cxcl13;Cxcl10;Ccl7;Ccl4;Ccl3;Aif1
GO:0002227	innate immune response in mucosa	6	19	0.00446939	0.113428	361247;680312;100910200;100365043;499926;64647	Hist1h2bd;Hist1h2bk;LOC100910200;LOC100365043;Bpifb1;Hist1h2bl
GO:0001773	myeloid dendritic cell activation	6	19	0.00446939	0.113428	353218;366126;56822;291100;29168;299206	Tnfsf9;Spi1;Cd86;Irf4;Ubd;Batf
GO:0048875	chemical homeostasis within a tissue	5	13	0.00477819	0.120052	25589;25350;245977;29452;25425	Kdr;Sftpd;Gpr116;Epas1;Ctsh
GO:1901623	regulation of lymphocyte chemotaxis	5	13	0.00477819	0.120052	498335;24770;116637;25542;287561	Cxcl13;Ccl2;Ccl4;Ccl3;Ccl7
GO:0000302	response to reactive oxygen species	23	175	0.00493392	0.123348	25524;170897;54237;24498;24493;117038;367166;24533;24773;170496;24451;29393;24807;25557;24787;29221;113898;117254;79217;25086;266807;24464;287877	Psap;Sphk1;Cdk1;Il6;Il1a;Mt3;Hyal1;Ldha;Sftpa1;Lcn2;Hmox1;Col1a1;Tacr1;Star;Sod2;Arg1;Prdx5;Prdx1;Gja3;Cyp2e1;Duox1;Hp;Pycr1
GO:0032760	positive regulation of tumor necrosis factor production	8	34	0.00500385	0.124472	64546;360918;117029;171569;116637;25542;24770;60350	Il12b;Pf4;Ccr5;Spon2;Ccl4;Ccl3;Ccl2;Cd14
GO:0010466	negative regulation of peptidase activity	26	207	0.00502841	0.124472	266775;117038;64041;24232;306283;100911545;117092;24648;291091;24795;295703;113898;171112;296257;25308;360228;116510;29366;24482;24498;83928;306251;287526;288001;316521;406161	Serpinb10;Mt3;Birc5;C3;Anxa8;LOC100911545;Serpinb7;Serpina1;Serpinb1a;Serpina3n;Serping1;Prdx5;Wfdc1;Cst7;Cstb;Wfdc21;Timp1;Serpine2;Igf1;Il6;Fetub;Itih1;Serpinf1;Kng1l1;Vil1;C4b
GO:0010951	negative regulation of endopeptidase activity	25	197	0.00521665	0.128498	266775;117038;64041;24232;306283;100911545;117092;24648;291091;24795;295703;113898;171112;296257;25308;116510;29366;24482;24498;83928;306251;287526;288001;316521;406161	Serpinb10;Mt3;Birc5;C3;Anxa8;LOC100911545;Serpinb7;Serpina1;Serpinb1a;Serpina3n;Serping1;Prdx5;Wfdc1;Cst7;Cstb;Timp1;Serpine2;Igf1;Il6;Fetub;Itih1;Serpinf1;Kng1l1;Vil1;C4b
GO:0032964	collagen biosynthetic process	7	27	0.00543387	0.133196	305253;117092;24498;24770;29221;113898;29393	Adamts3;Serpinb7;Il6;Ccl2;Arg1;Prdx5;Col1a1
GO:0002495	antigen processing and presentation of peptide antigen via MHC class II	6	20	0.00549601	0.134065	361689;289211;294269;301227;290644;688090	Unc93b1;Fcgr2b;RT1-Da;Trem2;Ifi30;RT1-Bb
GO:0070374	positive regulation of ERK1 and ERK2 cascade	16	106	0.00556079	0.134341	81639;89804;691993;89824;24367;113959;24366;24498;679975;301227;25542;25589;24232;24493;24890;117038	Alox15;Tek;Scimp;Chi3l1;Fgg;C5ar1;Fgb;Il6;Gpr183;Trem2;Ccl3;Kdr;C3;Il1a;Esr1;Mt3
GO:0006323	DNA packaging	16	106	0.00556079	0.134341	291145;684771;360243;294071;291159;680522;54237;304648;140586;25203;100360950;680097;288242;100912290;311336;288272	Hist1h1a;Cdca5;Top2a;Hells;Hist1h2ail;Hist1h1b;Cdk1;Asf1b;Sox9;Ccnb1;LOC100360950;LOC680097;Chaf1b;LOC100912290;Nusap1;Mis18a
GO:0009408	response to heat	14	87	0.00561652	0.135038	245920;60350;29465;81503;289747;24807;24498;24464;113936;24770;24493;114105;26296;81687	Cxcl10;Cd14;Trpv2;Cxcl1;Osm;Tacr1;Il6;Hp;Cpb2;Ccl2;Il1a;Cxcl2;Tfec;Mmp9
GO:0007596	blood coagulation	19	136	0.00565992	0.135434	306283;500707;691992;25728;406864;24366;24367;25651;290757;25083;295703;113936;29366;25364;24232;360918;310392;117512;84492	Anxa8;Tc2n;Gp1ba;Apoe;Clic1;Fgb;Fgg;Selp;F11;Adra2a;Serping1;Cpb2;Serpine2;Asic2;C3;Pf4;Slc7a11;C9;Tec
GO:0019934	cGMP-mediated signaling	4	8	0.00570658	0.135773	24599;50672;81743;25728	Nos2;Ednrb;Pde2a;Apoe
GO:0002764	immune response-regulating signaling pathway	22	167	0.00572816	0.135773	114203;317676;361689;498075;24832;25316;84387;25425;293783;304988;84492;501854;56822;305355;113959;291100;58949;25046;84007;83781;685692;499926	Sh2b2;Lat2;Unc93b1;Trat1;Thy1;Ms4a2;Pglyrp1;Ctsh;Lpxn;Mnda;Tec;Rab7b;Cd86;Tlr10;C5ar1;Irf4;Ptafr;Pigr;C3ar1;Lgals3;Gcsam;Bpifb1
GO:0097530	granulocyte migration	11	60	0.00579297	0.136047	287562;84007;287561;81503;113959;83781;25542;24770;24493;114105;301229	Ccl12;C3ar1;Ccl7;Cxcl1;C5ar1;Lgals3;Ccl3;Ccl2;Il1a;Cxcl2;Trem1
GO:0006801	superoxide metabolic process	9	43	0.00579384	0.136047	117038;302976;79129;25732;117254;24787;66021;24599;364018	Mt3;Noxo1;Cyba;Acp5;Prdx1;Sod2;Cybb;Nos2;Ncf2
GO:0007051	spindle organization	12	69	0.00585025	0.136733	296344;308064;171304;294286;311546;315298;311325;114482;25203;301701;289054;315330	Mybl2;Cep72;Kif11;Kifc1;Tpx2;Racgap1;Knstrn;Nek2;Ccnb1;Ndc80;Aspm;Espl1
GO:0006875	cellular metal ion homeostasis	39	355	0.00599903	0.139561	29597;25728;24832;25316;24212;24213;25542;25503;24890;245920;24392;81503;79129;81869;100362384;83731;84007;29292;83567;365901;498335;305236;301066;89788;100360087;113959;24807;117029;24770;114105;113910;306009;117038;287562;50672;301086;288026;689415;25589	P2ry2;Apoe;Thy1;Ms4a2;Atp1a2;Atp1a3;Ccl3;Ocm2;Esr1;Cxcl10;Gja1;Cxcl1;Cyba;Gstm7;LOC100362384;Kcnma1;C3ar1;Ftl1;Mchr1;Gnat2;Cxcl13;Cxcl11;Ccr8;Gna15;LOC100360087;C5ar1;Tacr1;Ccr5;Ccl2;Cxcl2;Prnd;Slc39a14;Mt3;Ccl12;Ednrb;Xcr1;Atp13a4;Mt2A;Kdr
GO:1903409	reactive oxygen species biosynthetic process	5	14	0.00614271	0.142245	24787;266807;79129;66021;100363502	Sod2;Duox1;Cyba;Cybb;LOC100363502
GO:0030193	regulation of blood coagulation	10	52	0.00624757	0.143352	500707;691992;25728;25651;290757;295703;113936;29366;25364;84492	Tc2n;Gp1ba;Apoe;Selp;F11;Serping1;Cpb2;Serpine2;Asic2;Tec
GO:1900046	regulation of hemostasis	10	52	0.00624757	0.143352	500707;691992;25728;25651;290757;295703;113936;29366;25364;84492	Tc2n;Gp1ba;Apoe;Selp;F11;Serping1;Cpb2;Serpine2;Asic2;Tec
GO:0061041	regulation of wound healing	13	79	0.00633877	0.144783	500707;691992;24392;25651;290757;25083;295703;113936;29366;25364;316521;84492;25728	Tc2n;Gp1ba;Gja1;Selp;F11;Adra2a;Serping1;Cpb2;Serpine2;Asic2;Vil1;Tec;Apoe
GO:0071371	cellular response to gonadotropin stimulus	7	28	0.00641884	0.144889	81819;25154;24883;25557;29200;29637;114090	Pax8;Pgr;Wt1;Star;Inhba;Hmgcs1;Egr2
GO:0033500	carbohydrate homeostasis	22	169	0.0064722	0.144889	25059;293118;24498;64041;24310;25334;79129;25060;84403;314386;89813;191575;25557;113936;245977;24953;25027;287526;63997;25083;79223;25627	Hk2;Prcp;Il6;Birc5;Ace;Bhlha15;Cyba;Hk3;Gjb6;Gpr68;Pdk4;Nme1;Star;Cpb2;Gpr116;Gcgr;Slc16a1;Serpinf1;Slc29a1;Adra2a;Gk;Cma1
GO:0042593	glucose homeostasis	22	169	0.0064722	0.144889	25059;293118;24498;64041;24310;25334;79129;25060;84403;314386;89813;191575;25557;113936;245977;24953;25027;287526;63997;25083;79223;25627	Hk2;Prcp;Il6;Birc5;Ace;Bhlha15;Cyba;Hk3;Gjb6;Gpr68;Pdk4;Nme1;Star;Cpb2;Gpr116;Gcgr;Slc16a1;Serpinf1;Slc29a1;Adra2a;Gk;Cma1
GO:0071103	DNA conformation change	19	138	0.00648755	0.144889	291159;291145;684771;360243;294071;291885;29728;54237;499870;304648;140586;25203;100360950;680522;680097;288242;100912290;311336;288272	Hist1h2ail;Hist1h1a;Cdca5;Top2a;Hells;Mcm5;Mcm4;Cdk1;Rad51;Asf1b;Sox9;Ccnb1;LOC100360950;Hist1h1b;LOC680097;Chaf1b;LOC100912290;Nusap1;Mis18a
GO:0007599	hemostasis	19	138	0.00648755	0.144889	306283;500707;691992;25728;406864;24366;24367;25651;290757;25083;295703;113936;29366;25364;24232;360918;310392;117512;84492	Anxa8;Tc2n;Gp1ba;Apoe;Clic1;Fgb;Fgg;Selp;F11;Adra2a;Serping1;Cpb2;Serpine2;Asic2;C3;Pf4;Slc7a11;C9;Tec
GO:0051047	positive regulation of secretion	32	278	0.00659864	0.146047	29597;170897;499342;25316;59267;113901;25542;25569;24493;24392;353250;79129;81820;29290;58812;360034;89804;303666;314386;24807;117029;113936;100360977;60350;25572;26989;24498;50672;24366;24367;679787;65171	P2ry2;Sphk1;Cd274;Ms4a2;Syt7;Chia;Ccl3;Trh;Il1a;Gja1;Niacr1;Cyba;Doc2b;Adora1;Apln;Myrip;Tek;RGD1561778;Gpr68;Tacr1;Ccr5;Cpb2;LOC100360977;Cd14;Tnfrsf4;Cadps;Il6;Ednrb;Fgb;Fgg;Clec5a;Scamp5
GO:0097066	response to thyroid hormone	6	21	0.00668476	0.146047	83516;294257;170913;24310;50654;25425	Ppargc1a;Cfb;Abcb1a;Ace;Ctss;Ctsh
GO:0002504	antigen processing and presentation of peptide or polysaccharide antigen via MHC class II	6	21	0.00668476	0.146047	361689;289211;294269;301227;290644;688090	Unc93b1;Fcgr2b;RT1-Da;Trem2;Ifi30;RT1-Bb
GO:0032354	response to follicle-stimulating hormone	6	21	0.00668476	0.146047	25154;24950;25557;29200;29637;29610	Pgr;Srd5a1;Star;Inhba;Hmgcs1;Tgfbr3
GO:0044243	multicellular organismal catabolic process	6	21	0.00668476	0.146047	63849;25335;29175;50654;81707;81687	Mmp8;Mmp7;Ctsk;Ctss;Mmp14;Mmp9
GO:0051050	positive regulation of transport	60	606	0.00677825	0.147449	29597;25350;25728;170897;499342;54237;25316;81869;24498;25544;116637;25542;315215;25569;24493;117258;24232;245920;24392;353250;29465;81503;79129;24770;315611;306811;81820;29290;24773;83567;498840;360034;305236;89804;303666;58812;314386;24832;24807;117029;689388;113936;29186;100360977;25364;60350;24482;25572;26989;59267;50672;113901;24366;24367;83781;289211;291437;679787;65171;406161	P2ry2;Sftpd;Apoe;Sphk1;Cd274;Cdk1;Ms4a2;Gstm7;Il6;Sele;Ccl4;Ccl3;Mlc1;Trh;Il1a;Cntn1;C3;Cxcl10;Gja1;Niacr1;Trpv2;Cxcl1;Cyba;Ccl2;Scn4b;Wnk2;Doc2b;Adora1;Sftpa1;Mchr1;Tmem173;Myrip;Cxcl11;Tek;RGD1561778;Apln;Gpr68;Thy1;Tacr1;Ccr5;Ptx3;Cpb2;Cd63;LOC100360977;Asic2;Cd14;Igf1;Tnfrsf4;Cadps;Syt7;Ednrb;Chia;Fgb;Fgg;Lgals3;Fcgr2b;Lipg;Clec5a;Scamp5;C4b
GO:0050817	coagulation	19	139	0.00693686	0.149704	306283;500707;691992;25728;406864;24366;24367;25651;290757;25083;295703;113936;29366;25364;24232;360918;310392;117512;84492	Anxa8;Tc2n;Gp1ba;Apoe;Clic1;Fgb;Fgg;Selp;F11;Adra2a;Serping1;Cpb2;Serpine2;Asic2;C3;Pf4;Slc7a11;C9;Tec
GO:0042310	vasoconstriction	13	80	0.0069415	0.149704	50672;58812;24366;24367;24807;25083;24212;24886;311167;25364;24310;25553;24392	Ednrb;Apln;Fgb;Fgg;Tacr1;Adra2a;Atp1a2;Tbxas1;Smtnl1;Asic2;Ace;Slc6a4;Gja1
GO:0071229	cellular response to acid chemical	18	129	0.00702116	0.150775	116640;89813;83516;287526;84032;79129;25203;140586;191575;24770;83791;24614;24571;292301;50592;25553;308100;29393	Tnc;Pdk4;Ppargc1a;Serpinf1;Col3a1;Cyba;Ccnb1;Sox9;Nme1;Ccl2;Fdps;Orm1;Muc1;T;Gria1;Slc6a4;Acat2;Col1a1
GO:0042542	response to hydrogen peroxide	17	119	0.00705273	0.150808	24498;25524;79217;170897;24464;24533;266807;54237;117254;25557;24787;287877;29221;113898;170496;24451;29393	Il6;Psap;Gja3;Sphk1;Hp;Ldha;Duox1;Cdk1;Prdx1;Star;Sod2;Pycr1;Arg1;Prdx5;Lcn2;Hmox1;Col1a1
GO:0006873	cellular ion homeostasis	42	394	0.00713621	0.151695	29597;25728;24832;25316;24212;24213;25542;25503;24890;245920;24392;289237;81503;79129;117596;100362384;83731;84007;29292;83567;365901;498335;305236;301066;89788;100360087;113959;24807;117029;24886;24770;114105;113910;306009;117038;287562;50672;301086;288026;81869;689415;25589	P2ry2;Apoe;Thy1;Ms4a2;Atp1a2;Atp1a3;Ccl3;Ocm2;Esr1;Cxcl10;Gja1;Slamf8;Cxcl1;Cyba;Atp6v1b2;LOC100362384;Kcnma1;C3ar1;Ftl1;Mchr1;Gnat2;Cxcl13;Cxcl11;Ccr8;Gna15;LOC100360087;C5ar1;Tacr1;Ccr5;Tbxas1;Ccl2;Cxcl2;Prnd;Slc39a14;Mt3;Ccl12;Ednrb;Xcr1;Atp13a4;Gstm7;Mt2A;Kdr
GO:0071385	cellular response to glucocorticoid stimulus	11	62	0.00715455	0.151695	24498;140939;287526;24950;24795;24770;25453;25557;24614;170913;29221	Il6;Trim63;Serpinf1;Srd5a1;Serpina3n;Ccl2;Gdnf;Star;Orm1;Abcb1a;Arg1
GO:0045471	response to ethanol	20	150	0.00726036	0.15265	116640;25728;366126;287561;191573;24807;25086;54237;296654;117099;25557;64041;24787;25383;79223;81718;24770;25569;60350;81687	Tnc;Apoe;Spi1;Ccl7;Grin3a;Tacr1;Cyp2e1;Cdk1;Gsn;Bdh1;Star;Birc5;Sod2;Apobec1;Gk;Cdo1;Ccl2;Trh;Cd14;Mmp9
GO:0006898	receptor-mediated endocytosis	20	150	0.00726036	0.15265	499264;498638;294335;50592;58966;170568;310693;293591;245955;685243;192211;25728;25544;289596;367074;29186;85266;79126;315215;54410	Apobr;Msr1;Susd2;Gria1;Ramp2;Dmbt1;Cd5l;Cd163l1;Lgals3bp;Ackr4;Prom2;Apoe;Sele;Corin;Tmprss4;Cd63;Prss12;Cfi;Mlc1;Enpp3
GO:0030003	cellular cation homeostasis	41	383	0.00730399	0.152927	29597;25728;24832;25316;24212;24213;25542;25503;24890;245920;24392;289237;81503;79129;117596;100362384;83731;84007;29292;83567;365901;498335;305236;301066;89788;100360087;113959;24807;117029;24770;114105;113910;306009;117038;287562;50672;301086;288026;81869;689415;25589	P2ry2;Apoe;Thy1;Ms4a2;Atp1a2;Atp1a3;Ccl3;Ocm2;Esr1;Cxcl10;Gja1;Slamf8;Cxcl1;Cyba;Atp6v1b2;LOC100362384;Kcnma1;C3ar1;Ftl1;Mchr1;Gnat2;Cxcl13;Cxcl11;Ccr8;Gna15;LOC100360087;C5ar1;Tacr1;Ccr5;Ccl2;Cxcl2;Prnd;Slc39a14;Mt3;Ccl12;Ednrb;Xcr1;Atp13a4;Gstm7;Mt2A;Kdr
GO:0046686	response to cadmium ion	9	45	0.00745772	0.154856	54237;117099;117038;25557;296654;24787;170913;29221;24451	Cdk1;Bdh1;Mt3;Star;Gsn;Sod2;Abcb1a;Arg1;Hmox1
GO:0002673	regulation of acute inflammatory response	9	45	0.00745772	0.154856	100911545;50672;289211;117029;24498;295703;29290;24232;24237	LOC100911545;Ednrb;Fcgr2b;Ccr5;Il6;Serping1;Adora1;C3;C6
GO:0002385	mucosal immune response	7	29	0.00753063	0.155191	361247;680312;100910200;25046;100365043;499926;64647	Hist1h2bd;Hist1h2bk;LOC100910200;Pigr;LOC100365043;Bpifb1;Hist1h2bl
GO:0071495	cellular response to endogenous stimulus	68	707	0.00755609	0.155191	29597;85497;81819;25154;299210;25033;25054;24950;293118;24498;497672;170913;116640;25569;50654;24890;364018;81687;291675;60582;89813;25017;84032;79129;24795;24770;81869;24614;29637;29610;81743;29427;25425;29393;498335;84510;50592;58940;304334;117038;140939;24212;25453;25557;29200;301227;25383;24953;364648;114203;29221;25694;83504;311827;24883;83516;79242;24366;287526;58966;25083;367166;140586;497…	P2ry2;Klf15;Pax8;Pgr;Esrrb;Sstr1;Ntrk2;Srd5a1;Prcp;Il6;Brca1;Abcb1a;Tnc;Trh;Ctss;Esr1;Ncf2;Mmp9;Mzb1;Il1rn;Pdk4;Myo5a;Col3a1;Cyba;Serpina3n;Ccl2;Gstm7;Orm1;Hmgcs1;Tgfbr3;Pde2a;Aif1;Ctsh;Col1a1;Cxcl13;Stmn2;Gria1;H2afz;Fam20c;Mt3;Trim63;Atp1a2;Gdnf;Star;Inhba;Trem2;Apobec1;Gcgr;Shcbp1;Sh2b2;Arg1;Has2;Kl;Adamtsl2;Wt1;Ppargc1a;Hpgd;Fgb;Serpinf1;Ramp2;Adra2a;Hyal1;Sox9;Tmem100;Egr2;Vil1;Rad51;Slc6a4
GO:0032526	response to retinoic acid	16	110	0.00756655	0.155191	89804;116640;25728;287526;140586;25425;313339;24614;25553;24770;292301;24773;29393;59103;24571;81687	Tek;Tnc;Apoe;Serpinf1;Sox9;Ctsh;Acer2;Orm1;Slc6a4;Ccl2;T;Sftpa1;Col1a1;Ptges;Muc1;Mmp9
GO:0030149	sphingolipid catabolic process	5	15	0.00775918	0.157217	282838;294422;362619;286896;314360	Gm2a;Smpdl3a;Smpdl3b;Sgpl1;Galc
GO:0033158	regulation of protein import into nucleus, translocation	5	15	0.00775918	0.157217	24498;54237;24482;81743;498840	Il6;Cdk1;Igf1;Pde2a;Tmem173
GO:0048246	macrophage chemotaxis	5	15	0.00775918	0.157217	24770;83781;50672;84007;25542	Ccl2;Lgals3;Ednrb;C3ar1;Ccl3
GO:0051988	regulation of attachment of spindle microtubules to kinetochore	4	9	0.00782394	0.157377	315298;25203;114482;311325	Racgap1;Ccnb1;Nek2;Knstrn
GO:0051297	centrosome organization	10	54	0.0078297	0.157377	300795;171304;310344;114482;117524;497672;298884;25027;296846;25515	Ns5atp9;Kif11;Plk4;Nek2;Ccnf;Brca1;Gen1;Slc16a1;Hepacam2;Plk1
GO:0006979	response to oxidative stress	35	316	0.00791709	0.158499	25524;25728;170897;54237;24498;499204;24493;117038;81687;287610;367166;24533;29427;113898;170496;24451;81707;29393;24807;362510;25557;24787;29221;310392;24773;117254;79217;83516;25086;266807;29452;24464;100363502;24479;287877	Psap;Apoe;Sphk1;Cdk1;Il6;Ddias;Il1a;Mt3;Mmp9;Lpo;Hyal1;Ldha;Aif1;Prdx5;Lcn2;Hmox1;Mmp14;Col1a1;Tacr1;Melk;Star;Sod2;Arg1;Slc7a11;Sftpa1;Prdx1;Gja3;Ppargc1a;Cyp2e1;Duox1;Epas1;Hp;LOC100363502;Idh1;Pycr1
GO:0006335	DNA replication-dependent nucleosome assembly	6	22	0.00804921	0.158617	680097;291159;304648;100360950;288242;100912290	LOC680097;Hist1h2ail;Asf1b;LOC100360950;Chaf1b;LOC100912290
GO:0010574	regulation of vascular endothelial growth factor production	6	22	0.00804921	0.158617	84007;24498;497672;24770;24232;24493	C3ar1;Il6;Brca1;Ccl2;C3;Il1a
GO:0034723	DNA replication-dependent nucleosome organization	6	22	0.00804921	0.158617	680097;291159;304648;100360950;288242;100912290	LOC680097;Hist1h2ail;Asf1b;LOC100360950;Chaf1b;LOC100912290
GO:0017144	drug metabolic process	6	22	0.00804921	0.158617	246245;83783;25086;54349;84493;25256	Fmo2;Sult1a1;Cyp2e1;Aox1;Fmo3;Fmo1
GO:0016064	immunoglobulin mediated immune response	13	82	0.00828259	0.162578	362634;289211;298566;29687;192262;295703;299206;79126;24232;688090;117512;406161;24237	C1qc;Fcgr2b;C1qa;C1qb;C1s;Serping1;Batf;Cfi;C3;RT1-Bb;C9;C4b;C6
GO:0034698	response to gonadotropin	9	46	0.00841524	0.164539	81819;25154;24950;24883;25557;29200;29637;29610;114090	Pax8;Pgr;Srd5a1;Wt1;Star;Inhba;Hmgcs1;Tgfbr3;Egr2
GO:0070371	ERK1 and ERK2 cascade	21	163	0.00848618	0.165283	81639;89804;691993;89824;24367;301227;24366;25425;24482;24498;679975;140586;306811;25542;25589;24232;24493;24890;113959;117038;310621	Alox15;Tek;Scimp;Chi3l1;Fgg;Trem2;Fgb;Ctsh;Igf1;Il6;Gpr183;Sox9;Wnk2;Ccl3;Kdr;C3;Il1a;Esr1;C5ar1;Mt3;Iqgap3
GO:0050707	regulation of cytokine secretion	14	92	0.00857324	0.166334	499342;89804;60350;303666;305355;500590;117029;24498;113901;679787;65171;25542;24493;25572	Cd274;Tek;Cd14;RGD1561778;Tlr10;Tnfrsf9;Ccr5;Il6;Chia;Clec5a;Scamp5;Ccl3;Il1a;Tnfrsf4
GO:0071384	cellular response to corticosteroid stimulus	11	64	0.00875352	0.168539	24498;140939;287526;24950;24795;24770;25453;25557;24614;170913;29221	Il6;Trim63;Serpinf1;Srd5a1;Serpina3n;Ccl2;Gdnf;Star;Orm1;Abcb1a;Arg1
GO:0090130	tissue migration	20	153	0.00875396	0.168539	498335;89804;65048;25728;287526;687536;24807;29610;293118;306636;367166;140586;117029;29186;25589;292301;316521;25425;311723;81687	Cxcl13;Tek;Fat2;Apoe;Serpinf1;Foxf1;Tacr1;Tgfbr3;Prcp;Efnb2;Hyal1;Sox9;Ccr5;Cd63;Kdr;T;Vil1;Ctsh;Sox18;Mmp9
GO:0051258	protein polymerization	19	143	0.0089933	0.17179	500377;54227;24171;84510;50665;300218;307351;246118;24367;291081;296654;296368;81639;24366;29213;297339;29427;100909441;316521	Tuba8;Arpc1b;Add2;Stmn2;Tmsb10;Tuba1c;Tubb6;Tubb3;Fgg;Tubb2b;Gsn;Ube2c;Alox15;Fgb;Tubb4a;Capg;Aif1;LOC100909441;Vil1
GO:0051480	cytosolic calcium ion homeostasis	26	218	0.00901771	0.17179	29597;24832;25316;24212;25542;25503;24890;245920;24392;81503;79129;81869;84007;83567;365901;498335;305236;301066;113959;24807;117029;114105;89788;50672;301086;25589	P2ry2;Thy1;Ms4a2;Atp1a2;Ccl3;Ocm2;Esr1;Cxcl10;Gja1;Cxcl1;Cyba;Gstm7;C3ar1;Mchr1;Gnat2;Cxcl13;Cxcl11;Ccr8;C5ar1;Tacr1;Ccr5;Cxcl2;Gna15;Ednrb;Xcr1;Kdr
GO:0019724	B cell mediated immunity	13	83	0.00902537	0.17179	362634;289211;298566;29687;192262;295703;299206;79126;24232;688090;117512;406161;24237	C1qc;Fcgr2b;C1qa;C1qb;C1s;Serping1;Batf;Cfi;C3;RT1-Bb;C9;C4b;C6
GO:0007049	cell cycle	80	863	0.00920776	0.1746	294074;300795;171576;680280;289777;500545;79242;297594;54237;689399;245918;117524;171529;25203;301701;170913;58835;360161;308768;24571;64515;24649;24493;296344;170897;171304;246118;315298;310344;296368;114482;117558;298850;291137;29427;310621;289993;64041;64546;684771;360243;500987;291597;315852;311546;289747;498709;114494;314818;29200;361416;304477;25553;289054;360621;311336;363227;24482;25515;8…	Cep55;Ns5atp9;Bub1b;Gas2l3;Fignl1;Cdca8;Hpgd;Cdca3;Cdk1;Cenpw;Cgref1;Ccnf;Kif2c;Ccnb1;Ndc80;Abcb1a;Phgdh;Nek6;Ticrr;Muc1;Cdc20;Pim1;Il1a;Mybl2;Sphk1;Kif11;Tubb3;Racgap1;Plk4;Ube2c;Nek2;Mylk2;Cenpa;Gmnn;Aif1;Iqgap3;Cdkn3;Birc5;Il12b;Cdca5;Top2a;H2afx;Trim36;Ttk;Tpx2;Osm;Cks2;Ccna2;E2f7;Inhba;Cenpn;Kntc1;Slc6a4;Aspm;Cdc6;Nusap1;Nabp1;Igf1;Plk1;Cit;Syce1;Mrgprx2;Cep72;Trip13;Bub1;Rrm2;Ska1;Nuf2;Ddia…
GO:0072503	cellular divalent inorganic cation homeostasis	33	297	0.00929192	0.175534	29597;25728;24832;25316;24212;25542;25503;24890;245920;24392;81503;79129;81869;84007;83567;365901;498335;305236;301066;89788;113959;24807;117029;24770;114105;306009;117038;287562;50672;301086;288026;689415;25589	P2ry2;Apoe;Thy1;Ms4a2;Atp1a2;Ccl3;Ocm2;Esr1;Cxcl10;Gja1;Cxcl1;Cyba;Gstm7;C3ar1;Mchr1;Gnat2;Cxcl13;Cxcl11;Ccr8;Gna15;C5ar1;Tacr1;Ccr5;Ccl2;Cxcl2;Slc39a14;Mt3;Ccl12;Ednrb;Xcr1;Atp13a4;Mt2A;Kdr
GO:0008347	glial cell migration	5	16	0.00964894	0.178999	114122;81651;24770;81707;25542	Vcan;Cspg4;Ccl2;Mmp14;Ccl3
GO:0031649	heat generation	5	16	0.00964894	0.178999	24493;60582;50672;117029;58812	Il1a;Il1rn;Ednrb;Ccr5;Apln
GO:0042832	defense response to protozoan	5	16	0.00964894	0.178999	64546;24498;291100;292060;299206	Il12b;Il6;Irf4;Irf8;Batf
GO:0006461	protein complex assembly	82	890	0.00966395	0.178999	500377;24191;315114;64625;292060;24834;500590;54237;116695;689399;684516;304648;29213;297339;25203;114482;29221;315215;100912290;81687;291675;291145;50665;296344;24392;171304;65178;246118;680522;79129;315298;362720;296368;24778;54227;29610;24962;83731;291137;29427;170496;288242;24451;29393;498335;29584;89804;84510;680097;24904;155430;294269;25651;116745;24787;25553;100360950;289054;100909441;1922…	Tuba8;Aldoc;C1qtnf6;Bid;Irf8;Tk1;Tnfrsf9;Cdk1;Kcnd1;Cenpw;Kcnc4;Asf1b;Tubb4a;Capg;Ccnb1;Nek2;Arg1;Mlc1;LOC100912290;Mmp9;Mzb1;Hist1h1a;Tmsb10;Mybl2;Gja1;Kif11;Snap91;Tubb3;Hist1h1b;Cyba;Racgap1;Rrm2;Ube2c;Slc2a1;Arpc1b;Tgfbr3;Cth;Kcnma1;Gmnn;Aif1;Lcn2;Chaf1b;Hmox1;Col1a1;Cxcl13;Gjb1;Tek;Stmn2;LOC680097;Slc22a1;Hey2;RT1-Da;Selp;Kcnh6;Sod2;Slc6a4;LOC100360950;Aspm;LOC100909441;Ehd3;Cadps;Add2;Gsn;M…
GO:0071621	granulocyte chemotaxis	10	56	0.00970341	0.178999	287562;84007;287561;81503;113959;83781;25542;24770;114105;301229	Ccl12;C3ar1;Ccl7;Cxcl1;C5ar1;Lgals3;Ccl3;Ccl2;Cxcl2;Trem1
GO:0050818	regulation of coagulation	10	56	0.00970341	0.178999	500707;691992;25728;25651;290757;295703;113936;29366;25364;84492	Tc2n;Gp1ba;Apoe;Selp;F11;Serping1;Cpb2;Serpine2;Asic2;Tec
GO:0009306	protein secretion	22	176	0.00972474	0.178999	499342;500590;25316;24498;113901;25542;24493;245920;89804;303666;89824;305355;117029;170824;100360977;60350;301229;25572;24366;24367;679787;65171	Cd274;Tnfrsf9;Ms4a2;Il6;Chia;Ccl3;Il1a;Cxcl10;Tek;RGD1561778;Chi3l1;Tlr10;Ccr5;Steap3;LOC100360977;Cd14;Trem1;Tnfrsf4;Fgb;Fgg;Clec5a;Scamp5
GO:0016125	sterol metabolic process	13	84	0.0098193	0.18008	81726;25330;25728;89784;140910;117038;25557;29637;83791;64191;365345;25427;29230	Mvd;Lipe;Apoe;Idi1;Msmo1;Mt3;Star;Hmgcs1;Fdps;Dhcr7;Cyb5r2;Cyp51;Sqle
GO:0001503	ossification	34	310	0.0099276	0.180309	29597;24807;406864;25542;680097;24890;100912290;81687;289777;83504;310448;304988;24848;29175;81707;29393;114122;89804;63849;116640;304334;25732;100360950;310395;24482;25654;24392;50671;298943;81639;140586;679787;114090;282836	P2ry2;Tacr1;Clic1;Ccl3;LOC680097;Esr1;LOC100912290;Mmp9;Fignl1;Kl;Igsf10;Mnda;Tph1;Ctsk;Mmp14;Col1a1;Vcan;Tek;Mmp8;Tnc;Fam20c;Acp5;LOC100360950;Ccr4;Igf1;Col11a1;Gja1;Fasn;Bcap29;Alox15;Sox9;Clec5a;Egr2;Cthrc1
GO:0007204	positive regulation of cytosolic calcium ion concentration	24	198	0.00992872	0.180309	29597;24832;25316;25542;24890;245920;24392;81503;79129;81869;84007;83567;365901;498335;305236;301066;113959;24807;117029;114105;89788;50672;301086;25589	P2ry2;Thy1;Ms4a2;Ccl3;Esr1;Cxcl10;Gja1;Cxcl1;Cyba;Gstm7;C3ar1;Mchr1;Gnat2;Cxcl13;Cxcl11;Ccr8;C5ar1;Tacr1;Ccr5;Cxcl2;Gna15;Ednrb;Xcr1;Kdr
GO:0071466	cellular response to xenobiotic stimulus	8	39	0.0100112	0.180309	287610;246245;81869;83783;25086;25557;54246;54349	Lpo;Fmo2;Gstm7;Sult1a1;Cyp2e1;Star;Cyp2f4;Aox1
GO:0071346	cellular response to interferon-gamma	8	39	0.0100112	0.180309	64546;24383;24795;24770;25557;25542;29427;688090	Il12b;Gapdh;Serpina3n;Ccl2;Star;Ccl3;Aif1;RT1-Bb
GO:0006805	xenobiotic metabolic process	8	39	0.0100112	0.180309	287610;246245;81869;83783;25086;25557;54246;54349	Lpo;Fmo2;Gstm7;Sult1a1;Cyp2e1;Star;Cyp2f4;Aox1
GO:0070271	protein complex biogenesis	82	892	0.0101336	0.180602	500377;24191;315114;64625;292060;24834;500590;54237;116695;689399;684516;304648;29213;297339;25203;114482;29221;315215;100912290;81687;291675;291145;50665;296344;24392;171304;65178;246118;680522;79129;315298;362720;296368;24778;54227;29610;24962;83731;291137;29427;170496;288242;24451;29393;498335;29584;89804;84510;680097;24904;155430;294269;25651;116745;24787;25553;100360950;289054;100909441;1922…	Tuba8;Aldoc;C1qtnf6;Bid;Irf8;Tk1;Tnfrsf9;Cdk1;Kcnd1;Cenpw;Kcnc4;Asf1b;Tubb4a;Capg;Ccnb1;Nek2;Arg1;Mlc1;LOC100912290;Mmp9;Mzb1;Hist1h1a;Tmsb10;Mybl2;Gja1;Kif11;Snap91;Tubb3;Hist1h1b;Cyba;Racgap1;Rrm2;Ube2c;Slc2a1;Arpc1b;Tgfbr3;Cth;Kcnma1;Gmnn;Aif1;Lcn2;Chaf1b;Hmox1;Col1a1;Cxcl13;Gjb1;Tek;Stmn2;LOC680097;Slc22a1;Hey2;RT1-Da;Selp;Kcnh6;Sod2;Slc6a4;LOC100360950;Aspm;LOC100909441;Ehd3;Cadps;Add2;Gsn;M…
GO:0010632	regulation of epithelial cell migration	15	104	0.0101411	0.180602	498335;89804;25728;287526;24807;29610;293118;367166;140586;117029;29186;25589;316521;25425;81687	Cxcl13;Tek;Apoe;Serpinf1;Tacr1;Tgfbr3;Prcp;Hyal1;Sox9;Ccr5;Cd63;Kdr;Vil1;Ctsh;Mmp9
GO:0006695	cholesterol biosynthetic process	7	31	0.0101712	0.180602	81726;25728;89784;29637;83791;64191;25427	Mvd;Apoe;Idi1;Hmgcs1;Fdps;Dhcr7;Cyp51
GO:0071398	cellular response to fatty acid	7	31	0.0101712	0.180602	83516;89813;191575;83791;116640;308100;25203	Ppargc1a;Pdk4;Nme1;Fdps;Tnc;Acat2;Ccnb1
GO:0072507	divalent inorganic cation homeostasis	34	311	0.0103443	0.181428	29597;25728;24832;25316;24212;25542;25503;24890;245920;24392;81503;79129;81869;84007;83567;365901;498335;305236;301066;89788;113959;24807;117029;24770;114105;83504;306009;117038;287562;50672;301086;288026;689415;25589	P2ry2;Apoe;Thy1;Ms4a2;Atp1a2;Ccl3;Ocm2;Esr1;Cxcl10;Gja1;Cxcl1;Cyba;Gstm7;C3ar1;Mchr1;Gnat2;Cxcl13;Cxcl11;Ccr8;Gna15;C5ar1;Tacr1;Ccr5;Ccl2;Cxcl2;Kl;Slc39a14;Mt3;Ccl12;Ednrb;Xcr1;Atp13a4;Mt2A;Kdr
GO:0019221	cytokine-mediated signaling pathway	23	188	0.0103952	0.181428	114203;685243;170897;25704;24498;81680;24493;245920;60582;100124593;24770;64546;305236;301066;117022;56765;117029;301227;25572;117038;301086;266807;360918	Sh2b2;Ackr4;Sphk1;Il2ra;Il6;Lifr;Il1a;Cxcl10;Il1rn;Cxcr6;Ccl2;Il12b;Cxcl11;Ccr8;Il1r2;Plvap;Ccr5;Trem2;Tnfrsf4;Mt3;Xcr1;Duox1;Pf4
GO:0048245	eosinophil chemotaxis	4	10	0.0103983	0.181428	83781;25542;287562;287561	Lgals3;Ccl3;Ccl12;Ccl7
GO:0033160	positive regulation of protein import into nucleus, translocation	4	10	0.0103983	0.181428	24498;54237;24482;498840	Il6;Cdk1;Igf1;Tmem173
GO:0045056	transcytosis	4	10	0.0103983	0.181428	298504;300027;684984;25046	Mfsd2a;Gpihbp1;Cd300lg;Pigr
GO:1990266	neutrophil migration	9	48	0.0106066	0.184423	84007;81503;113959;83781;25542;24770;24493;114105;301229	C3ar1;Cxcl1;C5ar1;Lgals3;Ccl3;Ccl2;Il1a;Cxcl2;Trem1
GO:0031023	microtubule organizing center organization	10	57	0.0107596	0.186336	300795;171304;310344;114482;117524;497672;298884;25027;296846;25515	Ns5atp9;Kif11;Plk4;Nek2;Ccnf;Brca1;Gen1;Slc16a1;Hepacam2;Plk1
GO:0071824	protein-DNA complex subunit organization	16	115	0.0108461	0.186336	291145;361416;680097;294071;155430;291159;680522;689399;304648;140586;25448;298850;100360950;288242;100912290;288272	Hist1h1a;Cenpn;LOC680097;Hells;Hey2;Hist1h2ail;Hist1h1b;Cenpw;Asf1b;Sox9;Cenpi;Cenpa;LOC100360950;Chaf1b;LOC100912290;Mis18a
GO:0051179	localization	309	3882	0.0108538	0.186336	29597;85497;81819;293650;499342;688605;317676;293154;29599;24498;289054;25350;365360;315215;303772;24493;684984;245920;50719;25349;24392;353250;29465;29695;140868;292935;315611;300027;29610;362474;83731;85266;29290;311374;311336;498840;498335;89804;293591;24904;314386;191573;65161;117558;191575;25453;304913;24953;311723;298504;60350;362861;25694;367166;25515;50676;79217;25054;50672;289229;25544;8…	P2ry2;Klf15;Pax8;Tcirg1;Cd274;Ccl1;Lat2;Folr2;Atp2b3;Il6;Aspm;Sftpd;Tmc5;Mlc1;Slc16a6;Il1a;Cd300lg;Cxcl10;Slc7a5;Scn2b;Gja1;Niacr1;Trpv2;Gabrr2;Fabp5;Htatip2;Scn4b;Gpihbp1;Tgfbr3;Adhfe1;Kcnma1;Prss12;Adora1;Duoxa1;Nusap1;Tmem173;Cxcl13;Tek;Cd163l1;Slc22a1;Gpr68;Grin3a;Litaf;Mylk2;Nme1;Gdnf;Tnn;Gcgr;Sox18;Mfsd2a;Cd14;Slc41a2;Has2;Hyal1;Plk1;Slc6a12;Gja3;Ntrk2;Ednrb;Vangl2;Sele;Lgals3;Slc7a7;P2ry6;…
GO:0001678	cellular glucose homeostasis	14	95	0.0108649	0.186336	25060;84403;25059;314386;79129;287526;63997;191575;25083;25557;64041;113936;25627;24310	Hk3;Gjb6;Hk2;Gpr68;Cyba;Serpinf1;Slc29a1;Nme1;Adra2a;Star;Birc5;Cpb2;Cma1;Ace
GO:0032844	regulation of homeostatic process	32	290	0.0111961	0.191056	89813;289596;24832;25316;25704;64041;25542;245920;24392;353250;79129;296368;24476;81869;316842;306811;29290;54264;305236;314386;301086;24807;117029;29200;25572;83516;50672;366126;29571;25349;25083;58812	Pdk4;Corin;Thy1;Ms4a2;Il2ra;Birc5;Ccl3;Cxcl10;Gja1;Niacr1;Cyba;Ube2c;Iapp;Gstm7;Metrnl;Wnk2;Adora1;Mafb;Cxcl11;Gpr68;Xcr1;Tacr1;Ccr5;Inhba;Tnfrsf4;Ppargc1a;Ednrb;Spi1;Scn10a;Scn2b;Adra2a;Apln
GO:0014910	regulation of smooth muscle cell migration	8	40	0.0113469	0.191056	29597;83516;25154;24807;117264;29427;24482;24310	P2ry2;Ppargc1a;Pgr;Tacr1;P2ry6;Aif1;Igf1;Ace
GO:0030195	negative regulation of blood coagulation	6	24	0.0113584	0.191056	691992;25728;290757;295703;113936;29366	Gp1ba;Apoe;F11;Serping1;Cpb2;Serpine2
GO:1900047	negative regulation of hemostasis	6	24	0.0113584	0.191056	691992;25728;290757;295703;113936;29366	Gp1ba;Apoe;F11;Serping1;Cpb2;Serpine2
GO:0050829	defense response to Gram-negative bacterium	6	24	0.0113584	0.191056	64546;25335;24498;60665;24599;301229	Il12b;Mmp7;Il6;Cxcl6;Nos2;Trem1
GO:0007155	cell adhesion	61	636	0.0113858	0.191056	498335;406864;81707;65154;29366;24832;171394;393092;25544;296654;64545;192129;117258;306081;81639;60582;298185;293783;84032;313339;292406;315615;24770;293186;65048;500906;29393;64546;114122;89804;687536;116640;116680;25732;362800;25651;363060;171569;304913;60379;117029;84397;29186;689069;361303;64057;310392;25694;114511;365216;691992;24366;24367;245955;245918;296156;306636;367166;140586;65034;255…	Cxcl13;Clic1;Mmp14;Wisp1;Serpine2;Thy1;Clstn2;Pcdhac2;Sele;Gsn;Icos;Vmp1;Cntn1;Pcdh20;Alox15;Il1rn;Frem1;Lpxn;Col3a1;Acer2;Thbs2;Dscaml1;Ccl2;Lyve1;Fat2;Cyth4;Col1a1;Il12b;Vcan;Tek;Foxf1;Tnc;Ptpru;Acp5;Itgb8;Selp;Plet1;Spon2;Tnn;Col5a3;Ccr5;Tnfaip6;Cd63;Parvg;Lims2;Hapln2;Slc7a11;Has2;Emb;Cadm4;Gp1ba;Fgb;Fgg;Lgals3bp;Cgref1;Cpxm1;Efnb2;Hyal1;Sox9;Pdzd2;Kdr
GO:0090066	regulation of anatomical structure size	35	325	0.0114269	0.191056	29597;25728;24212;296654;297339;24310;24392;29465;311167;54227;83731;29290;310621;24599;361327;24807;117029;24787;24886;25364;50665;83620;117038;24171;50672;24366;24367;29244;25083;81639;288001;58812;25589;316521;25553	P2ry2;Apoe;Atp1a2;Gsn;Capg;Ace;Gja1;Trpv2;Smtnl1;Arpc1b;Kcnma1;Adora1;Iqgap3;Nos2;Prr16;Tacr1;Ccr5;Sod2;Tbxas1;Asic2;Tmsb10;Cit;Mt3;Add2;Ednrb;Fgb;Fgg;Gch1;Adra2a;Alox15;Kng1l1;Apln;Kdr;Vil1;Slc6a4
GO:0008202	steroid metabolic process	25	212	0.0115835	0.191056	25330;25728;24950;117038;83791;246074;24493;365345;25427;29230;81726;286896;24890;29637;83731;116510;170635;140910;25557;64191;24482;83516;83783;25086;89784	Lipe;Apoe;Srd5a1;Mt3;Fdps;Scd1;Il1a;Cyb5r2;Cyp51;Sqle;Mvd;Sgpl1;Esr1;Hmgcs1;Kcnma1;Timp1;Dhrs9;Msmo1;Star;Dhcr7;Igf1;Ppargc1a;Sult1a1;Cyp2e1;Idi1
GO:0046456	icosanoid biosynthetic process	7	32	0.0117181	0.191056	58962;170897;50549;114097;81639;24886;59103	Hpgds;Sphk1;Cyp4a1;Ltc4s;Alox15;Tbxas1;Ptges
GO:0031145	anaphase-promoting complex-dependent proteasomal ubiquitin-dependent protein catabolic process	7	32	0.0117181	0.191056	83620;171576;360621;64515;296368;360161;25515	Cit;Bub1b;Cdc6;Cdc20;Ube2c;Nek6;Plk1
GO:1901570	fatty acid derivative biosynthetic process	7	32	0.0117181	0.191056	58962;170897;50549;114097;81639;24886;59103	Hpgds;Sphk1;Cyp4a1;Ltc4s;Alox15;Tbxas1;Ptges
GO:0034502	protein localization to chromosome	7	32	0.0117181	0.191056	684771;680522;54237;311327;171576;298850;25515	Cdca5;Hist1h1b;Cdk1;Casc5;Bub1b;Cenpa;Plk1
GO:0006633	fatty acid biosynthetic process	15	106	0.0117315	0.191056	58962;287424;170897;50671;89813;311569;114097;140910;81639;497672;24886;83792;246074;25017;59103	Hpgds;Aloxe3;Sphk1;Fasn;Pdk4;Acss2;Ltc4s;Msmo1;Alox15;Brca1;Tbxas1;Scd;Scd1;Myo5a;Ptges
GO:0046466	membrane lipid catabolic process	5	17	0.0118322	0.191056	282838;294422;362619;286896;314360	Gm2a;Smpdl3a;Smpdl3b;Sgpl1;Galc
GO:0019935	cyclic-nucleotide-mediated signaling	9	49	0.0118506	0.191056	245920;305236;50672;360918;140586;81743;171099;24599;25728	Cxcl10;Cxcl11;Ednrb;Pf4;Sox9;Pde2a;Rasd2;Nos2;Apoe
GO:0046683	response to organophosphorus	18	137	0.0118733	0.191056	89804;170897;24533;266807;24950;24795;24883;25557;81718;191575;81743;114090;192262;24770;25375;25553;304608;29393	Tek;Sphk1;Ldha;Duox1;Srd5a1;Serpina3n;Wt1;Star;Cdo1;Nme1;Pde2a;Egr2;C1s;Ccl2;Aldh3a1;Slc6a4;Mmp19;Col1a1
GO:0006957	complement activation, alternative pathway	3	5	0.0118748	0.191056	24232;294257;117512	C3;Cfb;C9
GO:2000427	positive regulation of apoptotic cell clearance	3	5	0.0118748	0.191056	24770;24232;406161	Ccl2;C3;C4b
GO:0072539	T-helper 17 cell differentiation	3	5	0.0118748	0.191056	24498;291100;299206	Il6;Irf4;Batf
GO:0050715	positive regulation of cytokine secretion	10	58	0.0119006	0.191056	499342;89804;60350;303666;117029;113901;679787;65171;25542;24493	Cd274;Tek;Cd14;RGD1561778;Ccr5;Chia;Clec5a;Scamp5;Ccl3;Il1a
GO:0006508	proteolysis	98	1102	0.0120239	0.191228	298282;266775;292848;24498;24310;296368;54269;85266;63865;305253;294257;66015;287106;363265;25515;83620;290757;54271;266758;25728;293676;64515;298068;117524;298512;83799;100911545;691603;117092;25425;171112;63849;360228;140939;100360872;316521;360621;117033;287526;288001;171576;302971;25335;56777;293118;117038;24795;316129;360161;81687;306283;291091;313339;295703;680945;25308;502774;116510;29366;…	Oma1;Serpinb10;Klk13;Il6;Ace;Ube2c;Mcpt10;Prss12;Lgmn;Adamts3;Cfb;Adamts4;Prss30;Col4a3;Plk1;Cit;F11;Tpsab1;Sec11c;Apoe;Ctsw;Cdc20;Sec61b;Ccnf;Rhbdl2;Dpp7;LOC100911545;LOC691603;Serpinb7;Ctsh;Wfdc1;Mmp8;Wfdc21;Trim63;Mcpt1l1;Vil1;Cdc6;Mmp12;Serpinf1;Kng1l1;Bub1b;Prss22;Mmp7;Adam1a;Prcp;Mt3;Serpina3n;Uhrf1;Nek6;Mmp9;Anxa8;Serpinb1a;Acer2;Serping1;Sdf2l1;Cstb;Cpvl;Timp1;Serpine2;Ctsz;C1s;Birc5;Bid;…
GO:0072359	circulatory system development	67	712	0.0120255	0.191228	289229;367166;25728;170897;287526;25054;54237;293118;364754;497672;83791;24232;24493;295691;81687;245920;365298;117092;24392;286896;266813;84032;81651;24482;292406;29610;25654;363265;24237;287129;24451;81707;29393;114122;89804;117558;58966;155430;89824;24832;687536;25651;117029;24883;314818;497979;64191;292935;311723;24310;24770;25694;287562;79242;366126;25203;29452;360918;306636;64536;140586;247…	Vangl2;Hyal1;Apoe;Sphk1;Serpinf1;Ntrk2;Cdk1;Prcp;Fzd8;Brca1;Fdps;C3;Il1a;Frzb;Mmp9;Cxcl10;Alpk3;Serpinb7;Gja1;Sgpl1;Prrx1;Col3a1;Cspg4;Igf1;Thbs2;Tgfbr3;Col11a1;Col4a3;C6;Tmem204;Hmox1;Mmp14;Col1a1;Vcan;Tek;Mylk2;Ramp2;Hey2;Chi3l1;Thy1;Foxf1;Selp;Ccr5;Wt1;E2f7;Tmem100;Dhcr7;Htatip2;Sox18;Ace;Ccl2;Has2;Ccl12;Hpgd;Spi1;Ccnb1;Epas1;Pf4;Efnb2;Esm1;Sox9;Sod2;C3ar1;Kdr;T;Ctsh;Cma1
GO:0072358	cardiovascular system development	67	712	0.0120255	0.191228	289229;367166;25728;170897;287526;25054;54237;293118;364754;497672;83791;24232;24493;295691;81687;245920;365298;117092;24392;286896;266813;84032;81651;24482;292406;29610;25654;363265;24237;287129;24451;81707;29393;114122;89804;117558;58966;155430;89824;24832;687536;25651;117029;24883;314818;497979;64191;292935;311723;24310;24770;25694;287562;79242;366126;25203;29452;360918;306636;64536;140586;247…	Vangl2;Hyal1;Apoe;Sphk1;Serpinf1;Ntrk2;Cdk1;Prcp;Fzd8;Brca1;Fdps;C3;Il1a;Frzb;Mmp9;Cxcl10;Alpk3;Serpinb7;Gja1;Sgpl1;Prrx1;Col3a1;Cspg4;Igf1;Thbs2;Tgfbr3;Col11a1;Col4a3;C6;Tmem204;Hmox1;Mmp14;Col1a1;Vcan;Tek;Mylk2;Ramp2;Hey2;Chi3l1;Thy1;Foxf1;Selp;Ccr5;Wt1;E2f7;Tmem100;Dhcr7;Htatip2;Sox18;Ace;Ccl2;Has2;Ccl12;Hpgd;Spi1;Ccnb1;Epas1;Pf4;Efnb2;Esm1;Sox9;Sod2;C3ar1;Kdr;T;Ctsh;Cma1
GO:0051234	establishment of localization	255	3166	0.0121002	0.191809	29597;85497;81819;293650;499342;317676;293154;29599;24498;113901;289949;315215;303772;24493;684984;245920;50719;24392;353250;29465;29695;140868;315298;315611;300027;362474;83731;85266;29290;311374;498840;365042;89804;293591;24904;80900;314386;191573;65161;117558;191575;25453;29200;60566;24770;298504;60350;362861;25694;25515;50676;79217;25054;50672;25544;83781;117264;79126;81639;58812;366949;49863…	P2ry2;Klf15;Pax8;Tcirg1;Cd274;Lat2;Folr2;Atp2b3;Il6;Chia;Fam3d;Mlc1;Slc16a6;Il1a;Cd300lg;Cxcl10;Slc7a5;Gja1;Niacr1;Trpv2;Gabrr2;Fabp5;Racgap1;Scn4b;Gpihbp1;Adhfe1;Kcnma1;Prss12;Adora1;Duoxa1;Tmem173;Rab32;Tek;Cd163l1;Slc22a1;Slco1a5;Gpr68;Grin3a;Litaf;Mylk2;Nme1;Gdnf;Inhba;Syt8;Ccl2;Mfsd2a;Cd14;Slc41a2;Has2;Plk1;Slc6a12;Gja3;Ntrk2;Ednrb;Sele;Lgals3;P2ry6;Cfi;Alox15;Apln;Mafa;Msr1;Ackr4;Psap;Sftpd…
GO:0006022	aminoglycan metabolic process	12	77	0.0122207	0.192532	367166;89824;306251;25694;24649;113901;295934;84387;25589;293186;307859;24482	Hyal1;Chi3l1;Itih1;Has2;Pim1;Chia;Chst1;Pglyrp1;Kdr;Lyve1;Chst5;Igf1
GO:0007017	microtubule-based process	41	397	0.0122224	0.192532	500377;300795;291441;301701;114482;311325;29213;308761;25203;680280;25027;315330;293502;296344;171304;246118;315298;310344;64041;311327;298850;296846;311336;84510;311546;361308;298884;289054;100909441;25515;24383;308064;300218;307351;294286;291081;117524;171529;306575;497672;309523	Tuba8;Ns5atp9;Ska1;Ndc80;Nek2;Knstrn;Tubb4a;Prc1;Ccnb1;Gas2l3;Slc16a1;Espl1;Kif22;Mybl2;Kif11;Tubb3;Racgap1;Plk4;Birc5;Casc5;Cenpa;Hepacam2;Nusap1;Stmn2;Tpx2;Kif20a;Gen1;Aspm;LOC100909441;Plk1;Gapdh;Cep72;Tuba1c;Tubb6;Kifc1;Tubb2b;Ccnf;Kif2c;Ckap2;Brca1;Kif20b
GO:0031347	regulation of defense response	33	304	0.0124235	0.195088	361689;290326;25704;24498;60665;84387;25542;24232;58949;24310;100911545;24392;289211;316842;25728;295703;81743;29290;24237;498840;64546;501854;291100;56822;305355;687536;25732;117029;311374;50672;287526;499926;50654	Unc93b1;Pbk;Il2ra;Il6;Cxcl6;Pglyrp1;Ccl3;C3;Ptafr;Ace;LOC100911545;Gja1;Fcgr2b;Metrnl;Apoe;Serping1;Pde2a;Adora1;C6;Tmem173;Il12b;Rab7b;Irf4;Cd86;Tlr10;Foxf1;Acp5;Ccr5;Duoxa1;Ednrb;Serpinf1;Bpifb1;Ctss
GO:0001819	positive regulation of cytokine production	23	192	0.0128216	0.200712	362076;29597;292060;24498;113901;116637;497672;25542;24232;360918;353218;24493;117092;24770;498840;64546;501854;117029;171569;361226;60350;84007;25083	Il36b;P2ry2;Irf8;Il6;Chia;Ccl4;Brca1;Ccl3;C3;Pf4;Tnfsf9;Il1a;Serpinb7;Ccl2;Tmem173;Il12b;Rab7b;Ccr5;Spon2;Cd83;Cd14;C3ar1;Adra2a
GO:0032940	secretion by cell	61	641	0.0130593	0.203799	499342;317676;289949;81819;299339;170897;25054;24953;24498;113901;64041;365377;25316;25542;25569;24493;25017;291597;245920;60582;24392;353250;60566;81820;85266;29290;24451;687536;58812;360034;89804;500590;303666;314386;89824;305355;289747;24807;117029;170824;29200;113936;81511;29366;100360977;25027;60350;301229;25572;26989;684516;287562;59267;24367;25083;24366;679787;65171;366949;65178;302538	Cd274;Lat2;Fam3d;Pax8;Tnfaip2;Sphk1;Ntrk2;Gcgr;Il6;Chia;Birc5;Trim72;Ms4a2;Ccl3;Trh;Il1a;Myo5a;Trim36;Cxcl10;Il1rn;Gja1;Niacr1;Syt8;Doc2b;Prss12;Adora1;Hmox1;Foxf1;Apln;Myrip;Tek;Tnfrsf9;RGD1561778;Gpr68;Chi3l1;Tlr10;Osm;Tacr1;Ccr5;Steap3;Inhba;Cpb2;Lat;Serpine2;LOC100360977;Slc16a1;Cd14;Trem1;Tnfrsf4;Cadps;Kcnc4;Ccl12;Syt7;Fgg;Adra2a;Fgb;Clec5a;Scamp5;Mafa;Snap91;Sytl5
GO:0019229	regulation of vasoconstriction	10	59	0.0131306	0.204276	24392;24366;24367;24807;25083;24212;24886;311167;25364;58812	Gja1;Fgb;Fgg;Tacr1;Adra2a;Atp1a2;Tbxas1;Smtnl1;Asic2;Apln
GO:0022610	biological adhesion	61	642	0.0134173	0.205367	498335;406864;81707;65154;29366;24832;171394;393092;25544;296654;64545;192129;117258;306081;81639;60582;298185;293783;84032;313339;292406;315615;24770;293186;65048;500906;29393;64546;114122;89804;687536;116640;116680;25732;362800;25651;363060;171569;304913;60379;117029;84397;29186;689069;361303;64057;310392;25694;114511;365216;691992;24366;24367;245955;245918;296156;306636;367166;140586;65034;255…	Cxcl13;Clic1;Mmp14;Wisp1;Serpine2;Thy1;Clstn2;Pcdhac2;Sele;Gsn;Icos;Vmp1;Cntn1;Pcdh20;Alox15;Il1rn;Frem1;Lpxn;Col3a1;Acer2;Thbs2;Dscaml1;Ccl2;Lyve1;Fat2;Cyth4;Col1a1;Il12b;Vcan;Tek;Foxf1;Tnc;Ptpru;Acp5;Itgb8;Selp;Plet1;Spon2;Tnn;Col5a3;Ccr5;Tnfaip6;Cd63;Parvg;Lims2;Hapln2;Slc7a11;Has2;Emb;Cadm4;Gp1ba;Fgb;Fgg;Lgals3bp;Cgref1;Cpxm1;Efnb2;Hyal1;Sox9;Pdzd2;Kdr
GO:0022409	positive regulation of cell-cell adhesion	7	33	0.0134279	0.205367	498335;24366;24367;117029;81639;24770;25694	Cxcl13;Fgb;Fgg;Ccr5;Alox15;Ccl2;Has2
GO:0010818	T cell chemotaxis	4	11	0.0134625	0.205367	498335;305236;25542;245920	Cxcl13;Cxcl11;Ccl3;Cxcl10
GO:0071459	protein localization to chromosome, centromeric region	4	11	0.0134625	0.205367	171576;54237;298850;311327	Bub1b;Cdk1;Cenpa;Casc5
GO:0042730	fibrinolysis	4	11	0.0134625	0.205367	295703;113936;691992;290757	Serping1;Cpb2;Gp1ba;F11
GO:0001660	fever generation	4	11	0.0134625	0.205367	24493;60582;50672;117029	Il1a;Il1rn;Ednrb;Ccr5
GO:0002274	myeloid leukocyte activation	15	108	0.0135105	0.205367	361537;353218;291100;366126;56822;687536;24832;317676;25316;81511;25542;29427;29168;24451;299206	Tyrobp;Tnfsf9;Irf4;Spi1;Cd86;Foxf1;Thy1;Lat2;Ms4a2;Lat;Ccl3;Aif1;Ubd;Hmox1;Batf
GO:0051128	regulation of cellular component organization	116	1339	0.0135276	0.205367	29597;81819;298282;65154;24498;24493;245920;24392;29465;315298;296368;24251;29610;24962;498335;89804;299242;25453;29200;60350;24773;25515;83620;289229;29455;81639;25589;305827;25350;25728;170897;25054;64515;64041;83791;117258;24571;50665;680522;79129;24770;29639;171112;84510;24807;24883;64625;113976;360621;362235;287526;65171;29143;65178;298884;171576;292060;311325;117038;25544;25542;360161;11752…	P2ry2;Pax8;Oma1;Wisp1;Il6;Il1a;Cxcl10;Gja1;Trpv2;Racgap1;Ube2c;Cd53;Tgfbr3;Cth;Cxcl13;Tek;Gpr65;Gdnf;Inhba;Cd14;Sftpa1;Plk1;Cit;Vangl2;Gdf15;Alox15;Kdr;Wdhd1;Sftpd;Apoe;Sphk1;Ntrk2;Cdc20;Birc5;Fdps;Cntn1;Muc1;Tmsb10;Hist1h1b;Cyba;Ccl2;Fxyd2;Wfdc1;Stmn2;Tacr1;Wt1;Bid;Acsl4;Cdc6;Syndig1;Serpinf1;Scamp5;Grn;Snap91;Gen1;Bub1b;Irf8;Knstrn;Mt3;Sele;Ccl3;Nek6;Ccnf;Plk4;Prom2;Thbs2;Arpc1b;Doc2b;Col1a1;RG…
GO:0048871	multicellular organismal homeostasis	24	205	0.0141509	0.214182	25350;89813;298282;293118;117254;24493;25425;60582;24476;316842;29290;113898;25732;25046;245977;117029;29175;83516;50672;29452;140586;58812;25589;50654	Sftpd;Pdk4;Oma1;Prcp;Prdx1;Il1a;Ctsh;Il1rn;Iapp;Metrnl;Adora1;Prdx5;Acp5;Pigr;Gpr116;Ccr5;Ctsk;Ppargc1a;Ednrb;Epas1;Sox9;Apln;Kdr;Ctss
GO:0052547	regulation of peptidase activity	34	319	0.0142203	0.214586	266775;64625;24498;64041;24232;25425;306283;100911545;117092;29569;24648;291091;24795;313339;295703;363265;113898;171112;81707;296257;25308;360228;116510;29366;24482;117038;83928;306251;287526;288001;100363502;316521;684050;406161	Serpinb10;Bid;Il6;Birc5;C3;Ctsh;Anxa8;LOC100911545;Serpinb7;Pcolce;Serpina1;Serpinb1a;Serpina3n;Acer2;Serping1;Col4a3;Prdx5;Wfdc1;Mmp14;Cst7;Cstb;Wfdc21;Timp1;Serpine2;Igf1;Mt3;Fetub;Itih1;Serpinf1;Kng1l1;LOC100363502;Vil1;PCOLCE2;C4b
GO:2000352	negative regulation of endothelial cell apoptotic process	5	18	0.0143278	0.214917	25589;24367;89804;24366;58966	Kdr;Fgg;Tek;Fgb;Ramp2
GO:0042104	positive regulation of activated T cell proliferation	5	18	0.0143278	0.214917	64546;353218;24482;56822;25704	Il12b;Tnfsf9;Igf1;Cd86;Il2ra
GO:0002757	immune response-activating signal transduction	19	151	0.0145641	0.217811	501854;317676;291100;361689;56822;114203;293783;305355;113959;498075;24832;685692;304988;84387;84007;499926;58949;83781;84492	Rab7b;Lat2;Irf4;Unc93b1;Cd86;Sh2b2;Lpxn;Tlr10;C5ar1;Trat1;Thy1;Gcsam;Mnda;Pglyrp1;C3ar1;Bpifb1;Ptafr;Lgals3;Tec
GO:1901655	cellular response to ketone	9	51	0.0146604	0.218601	24498;140939;287526;24950;24770;25453;25557;170913;29221	Il6;Trim63;Serpinf1;Srd5a1;Ccl2;Gdnf;Star;Abcb1a;Arg1
GO:0043066	negative regulation of apoptotic process	52	535	0.0147361	0.218914	64557;81819;25728;289777;25054;54237;24498;499204;25364;81680;117038;294071;24649;60582;25154;170897;24770;63865;24962;29290;113898;25425;24451;89804;58966;155430;24832;113959;116510;117029;25453;25557;24787;29427;117232;361303;24482;25572;25515;24883;83516;50672;24366;24367;64041;50692;81639;140586;679787;114090;25589;89813	Bard1;Pax8;Apoe;Fignl1;Ntrk2;Cdk1;Il6;Ddias;Asic2;Lifr;Mt3;Hells;Pim1;Il1rn;Pgr;Sphk1;Ccl2;Lgmn;Cth;Adora1;Prdx5;Ctsh;Hmox1;Tek;Ramp2;Hey2;Thy1;C5ar1;Timp1;Ccr5;Gdnf;Star;Sod2;Aif1;Barhl1;Lims2;Igf1;Tnfrsf4;Plk1;Wt1;Ppargc1a;Ednrb;Fgb;Fgg;Birc5;Plaur;Alox15;Sox9;Clec5a;Egr2;Kdr;Pdk4
GO:0007565	female pregnancy	20	162	0.0147685	0.218914	25330;60582;58966;25154;79242;116510;289596;24310;24770;170897;25083;29143;29366;192129;29221;81687;24890;24482;24571;113976	Lipe;Il1rn;Ramp2;Pgr;Hpgd;Timp1;Corin;Ace;Ccl2;Sphk1;Adra2a;Grn;Serpine2;Vmp1;Arg1;Mmp9;Esr1;Igf1;Muc1;Acsl4
GO:0044706	multi-multicellular organism process	24	206	0.0148561	0.219507	25330;25154;289596;24834;192129;24890;24571;24310;60582;170897;24770;81687;58966;116510;24807;25553;29366;29221;24482;113976;79242;25083;29143;292301	Lipe;Pgr;Corin;Tk1;Vmp1;Esr1;Muc1;Ace;Il1rn;Sphk1;Ccl2;Mmp9;Ramp2;Timp1;Tacr1;Slc6a4;Serpine2;Arg1;Igf1;Acsl4;Hpgd;Adra2a;Grn;T
GO:0006629	lipid metabolic process	79	871	0.0149258	0.219507	499264;287450;25524;25728;25154;140868;298282;690625;309014;25330;114097;362619;117038;116720;25427;83791;83792;246074;83731;24232;24493;24890;59103;362800;29230;81726;361527;60582;170897;353250;286896;291437;365345;50559;29692;313339;25017;29637;316330;497009;29290;497672;24451;294422;58962;89804;287424;25629;79242;116510;89813;311569;170635;361993;24950;25557;64191;24886;25083;25027;140910;2448…	Apobr;Slc16a11;Psap;Apoe;Pgr;Fabp5;Oma1;Oc90;Ppapdc1a;Lipe;Ltc4s;Smpdl3b;Mt3;Pik3c2g;Cyp51;Fdps;Scd;Scd1;Kcnma1;C3;Il1a;Esr1;Ptges;Itgb8;Sqle;Mvd;Pld3;Il1rn;Sphk1;Niacr1;Sgpl1;Lipg;Cyb5r2;Acot1;Pla2g2a;Acer2;Myo5a;Hmgcs1;Ankrd23;Naaa;Adora1;Brca1;Hmox1;Smpdl3a;Hpgds;Tek;Aloxe3;Plin1;Hpgd;Timp1;Pdk4;Acss2;Dhrs9;Them5;Srd5a1;Star;Dhcr7;Tbxas1;Adra2a;Slc16a1;Msmo1;Igf1;Acsl4;Plbd1;Ppargc1a;Fasn;Lbp;…
GO:0060548	negative regulation of cell death	58	609	0.0149396	0.219507	64557;25524;81819;25728;289777;25054;54237;24498;499204;170913;81680;360918;24890;117038;294071;24649;60582;25154;170897;24770;63865;24962;29290;113898;25425;24451;89804;58966;155430;24832;113959;116510;117029;25453;25557;25364;24787;29427;117232;361303;24482;25572;25515;24883;83516;50672;24366;24367;287526;64041;50692;81639;140586;679787;114090;25589;89813;287877	Bard1;Psap;Pax8;Apoe;Fignl1;Ntrk2;Cdk1;Il6;Ddias;Abcb1a;Lifr;Pf4;Esr1;Mt3;Hells;Pim1;Il1rn;Pgr;Sphk1;Ccl2;Lgmn;Cth;Adora1;Prdx5;Ctsh;Hmox1;Tek;Ramp2;Hey2;Thy1;C5ar1;Timp1;Ccr5;Gdnf;Star;Asic2;Sod2;Aif1;Barhl1;Lims2;Igf1;Tnfrsf4;Plk1;Wt1;Ppargc1a;Ednrb;Fgb;Fgg;Serpinf1;Birc5;Plaur;Alox15;Sox9;Clec5a;Egr2;Kdr;Pdk4;Pycr1
GO:0070301	cellular response to hydrogen peroxide	11	70	0.0152327	0.222337	24498;25524;170897;266807;54237;117254;24464;29221;113898;170496;287877	Il6;Psap;Sphk1;Duox1;Cdk1;Prdx1;Hp;Arg1;Prdx5;Lcn2;Pycr1
GO:0032755	positive regulation of interleukin-6 production	7	34	0.0153091	0.222337	362076;501854;353218;117029;171569;24498;24493	Il36b;Rab7b;Tnfsf9;Ccr5;Spon2;Il6;Il1a
GO:0050766	positive regulation of phagocytosis	7	34	0.0153091	0.222337	25350;289211;689388;24770;24232;24773;406161	Sftpd;Fcgr2b;Ptx3;Ccl2;C3;Sftpa1;C4b
GO:0000060	protein import into nucleus, translocation	7	34	0.0153091	0.222337	117038;54237;298068;24498;81743;24482;498840	Mt3;Cdk1;Sec61b;Il6;Pde2a;Igf1;Tmem173
GO:0050850	positive regulation of calcium-mediated signaling	6	26	0.0155258	0.223545	498075;116637;301227;25542;25589;24482	Trat1;Ccl4;Trem2;Ccl3;Kdr;Igf1
GO:0072678	T cell migration	6	26	0.0155258	0.223545	498335;305236;245920;25542;24770;29427	Cxcl13;Cxcl11;Cxcl10;Ccl3;Ccl2;Aif1
GO:0050819	negative regulation of coagulation	6	26	0.0155258	0.223545	691992;25728;290757;295703;113936;29366	Gp1ba;Apoe;F11;Serping1;Cpb2;Serpine2
GO:0097529	myeloid leukocyte migration	13	90	0.0157854	0.226633	287562;50672;84007;287561;81503;113959;24770;83781;25542;29427;24493;114105;301229	Ccl12;Ednrb;C3ar1;Ccl7;Cxcl1;C5ar1;Ccl2;Lgals3;Ccl3;Aif1;Il1a;Cxcl2;Trem1
GO:0014909	smooth muscle cell migration	8	43	0.0161404	0.229626	29597;83516;25154;24807;117264;29427;24482;24310	P2ry2;Ppargc1a;Pgr;Tacr1;P2ry6;Aif1;Igf1;Ace
GO:1903532	positive regulation of secretion by cell	28	253	0.0161881	0.229626	499342;170897;25316;59267;113901;25542;25569;24493;24392;353250;81820;65171;360034;89804;303666;314386;24807;117029;113936;100360977;60350;25572;26989;24498;24366;24367;679787;58812	Cd274;Sphk1;Ms4a2;Syt7;Chia;Ccl3;Trh;Il1a;Gja1;Niacr1;Doc2b;Scamp5;Myrip;Tek;RGD1561778;Gpr68;Tacr1;Ccr5;Cpb2;LOC100360977;Cd14;Tnfrsf4;Cadps;Il6;Fgb;Fgg;Clec5a;Apln
GO:0071300	cellular response to retinoic acid	9	52	0.0162362	0.229626	116640;287526;140586;24614;25553;24770;292301;24571;29393	Tnc;Serpinf1;Sox9;Orm1;Slc6a4;Ccl2;T;Muc1;Col1a1
GO:0051046	regulation of secretion	49	502	0.016354	0.229626	29597;289949;81819;170897;499342;25054;25316;24498;113901;64041;25542;25569;24493;25017;60582;24392;353250;79129;81820;289596;29290;24451;687536;58812;360034;89804;500590;303666;26989;314386;305355;289747;24807;117029;29200;113936;100360977;25027;60350;25572;113976;684516;50672;59267;24367;25083;24366;679787;65171	P2ry2;Fam3d;Pax8;Sphk1;Cd274;Ntrk2;Ms4a2;Il6;Chia;Birc5;Ccl3;Trh;Il1a;Myo5a;Il1rn;Gja1;Niacr1;Cyba;Doc2b;Corin;Adora1;Hmox1;Foxf1;Apln;Myrip;Tek;Tnfrsf9;RGD1561778;Cadps;Gpr68;Tlr10;Osm;Tacr1;Ccr5;Inhba;Cpb2;LOC100360977;Slc16a1;Cd14;Tnfrsf4;Acsl4;Kcnc4;Ednrb;Syt7;Fgg;Adra2a;Fgb;Clec5a;Scamp5
GO:0051094	positive regulation of developmental process	68	737	0.0164893	0.229626	362076;498638;25203;81819;25728;406864;170568;287526;25054;64515;25704;24498;289054;497672;83791;25542;24232;24493;295691;81687;353218;24392;29465;311374;304988;170897;24251;292406;316842;304334;24237;24451;29393;64546;501854;89804;58966;155430;314386;89824;54237;24848;117029;361226;25557;29200;497979;29366;24310;25364;310395;24482;83504;25453;83516;84007;362235;29455;24883;360918;306636;367166;1…	Il36b;Msr1;Ccnb1;Pax8;Apoe;Clic1;Dmbt1;Serpinf1;Ntrk2;Cdc20;Il2ra;Il6;Aspm;Brca1;Fdps;Ccl3;C3;Il1a;Frzb;Mmp9;Tnfsf9;Gja1;Trpv2;Duoxa1;Mnda;Sphk1;Cd53;Thbs2;Metrnl;Fam20c;C6;Hmox1;Col1a1;Il12b;Rab7b;Tek;Ramp2;Hey2;Gpr68;Chi3l1;Cdk1;Tph1;Ccr5;Cd83;Star;Inhba;Tmem100;Serpine2;Ace;Asic2;Ccr4;Igf1;Kl;Gdnf;Ppargc1a;C3ar1;Syndig1;Gdf15;Wt1;Pf4;Efnb2;Hyal1;Sox9;Grn;Kdr;Cthrc1;Ctsh;Cma1
GO:0050673	epithelial cell proliferation	29	265	0.0165666	0.229626	25728;25154;24498;117033;24890;310621;24392;79129;29692;29610;24770;24599;171112;81707;89804;113959;24807;191575;113936;29221;361303;24482;50672;287526;306636;367166;140586;29143;25589	Apoe;Pgr;Il6;Mmp12;Esr1;Iqgap3;Gja1;Cyba;Pla2g2a;Tgfbr3;Ccl2;Nos2;Wfdc1;Mmp14;Tek;C5ar1;Tacr1;Nme1;Cpb2;Arg1;Lims2;Igf1;Ednrb;Serpinf1;Efnb2;Hyal1;Sox9;Grn;Kdr
GO:0048519	negative regulation of biological process	238	2965	0.016688	0.229626	29597;85497;81819;89813;499342;298282;266775;79431;24498;54296;84387;294043;24493;100912290;117038;310621;245920;24392;353250;315691;29692;81869;304988;29610;24962;83731;29290;54289;54264;498335;89804;360243;58966;314386;191573;301086;65161;291100;191575;363227;25453;114482;29200;24787;311723;289054;100360950;304477;25515;83620;312897;24383;50672;289229;83781;290757;306636;24464;81707;58812;25589…	P2ry2;Klf15;Pax8;Pdk4;Cd274;Oma1;Serpinb10;Bhlhe40;Il6;Rgs7;Pglyrp1;Sorcs3;Il1a;LOC100912290;Mt3;Iqgap3;Cxcl10;Gja1;Niacr1;Lingo1;Pla2g2a;Gstm7;Mnda;Tgfbr3;Cth;Kcnma1;Adora1;Rgs1;Mafb;Cxcl13;Tek;Top2a;Ramp2;Gpr68;Grin3a;Xcr1;Litaf;Irf4;Nme1;Nabp1;Gdnf;Nek2;Inhba;Sod2;Sox18;Aspm;LOC100360950;Kntc1;Plk1;Cit;Msc;Gapdh;Ednrb;Vangl2;Lgals3;F11;Efnb2;Hp;Mmp14;Apln;Kdr;T;Pdcd1lg2;Psap;C1qc;Apoe;Sphk1;Ra…
GO:0071675	regulation of mononuclear cell migration	3	6	0.0169622	0.229626	24770;83781;84007	Ccl2;Lgals3;C3ar1
GO:0002295	T-helper cell lineage commitment	3	6	0.0169622	0.229626	24498;291100;299206	Il6;Irf4;Batf
GO:0034699	response to luteinizing hormone	3	6	0.0169622	0.229626	25557;29610;25154	Star;Tgfbr3;Pgr
GO:0072538	T-helper 17 type immune response	3	6	0.0169622	0.229626	24498;291100;299206	Il6;Irf4;Batf
GO:0006268	DNA unwinding involved in DNA replication	3	6	0.0169622	0.229626	29728;360243;499870	Mcm4;Top2a;Rad51
GO:0043373	CD4-positive, alpha-beta T cell lineage commitment	3	6	0.0169622	0.229626	24498;291100;299206	Il6;Irf4;Batf
GO:0085020	protein K6-linked ubiquitination	3	6	0.0169622	0.229626	64557;497672;360847	Bard1;Brca1;Ube2t
GO:0070995	NADPH oxidation	3	6	0.0169622	0.229626	113898;246245;25256	Prdx5;Fmo2;Fmo1
GO:0034116	positive regulation of heterotypic cell-cell adhesion	3	6	0.0169622	0.229626	81639;24367;24366	Alox15;Fgg;Fgb
GO:1901215	negative regulation of neuron death	18	143	0.0170098	0.229626	24498;117232;25728;113959;25054;287526;24482;25453;25557;64041;24787;63865;24770;25589;83516;24890;24451;117038	Il6;Barhl1;Apoe;C5ar1;Ntrk2;Serpinf1;Igf1;Gdnf;Star;Birc5;Sod2;Lgmn;Ccl2;Kdr;Ppargc1a;Esr1;Hmox1;Mt3
GO:0034114	regulation of heterotypic cell-cell adhesion	4	12	0.0170449	0.229626	81639;24367;60582;24366	Alox15;Fgg;Il1rn;Fgb
GO:0045540	regulation of cholesterol biosynthetic process	4	12	0.0170449	0.229626	83791;64191;25427;25728	Fdps;Dhcr7;Cyp51;Apoe
GO:0072677	eosinophil migration	4	12	0.0170449	0.229626	83781;25542;287562;287561	Lgals3;Ccl3;Ccl12;Ccl7
GO:2001212	regulation of vasculogenesis	4	12	0.0170449	0.229626	25589;497979;58966;155430	Kdr;Tmem100;Ramp2;Hey2
GO:0071276	cellular response to cadmium ion	4	12	0.0170449	0.229626	117038;25557;296654;24451	Mt3;Star;Gsn;Hmox1
GO:0060736	prostate gland growth	4	12	0.0170449	0.229626	140586;25524;24890;24482	Sox9;Psap;Esr1;Igf1
GO:0001562	response to protozoan	5	19	0.0171532	0.229853	64546;24498;291100;292060;299206	Il12b;Il6;Irf4;Irf8;Batf
GO:0000281	mitotic cytokinesis	5	19	0.0171532	0.229853	306575;294074;315298;311336;25515	Ckap2;Cep55;Racgap1;Nusap1;Plk1
GO:0030155	regulation of cell adhesion	27	243	0.0172007	0.229876	498335;29366;296654;60582;293783;313339;315615;24770;500906;29393;64546;89804;116640;25732;687536;25651;117029;363060;29186;25694;24366;24367;81639;367166;140586;81707;25589	Cxcl13;Serpine2;Gsn;Il1rn;Lpxn;Acer2;Dscaml1;Ccl2;Cyth4;Col1a1;Il12b;Tek;Tnc;Acp5;Foxf1;Selp;Ccr5;Plet1;Cd63;Has2;Fgb;Fgg;Alox15;Hyal1;Sox9;Mmp14;Kdr
GO:0033002	muscle cell proliferation	17	133	0.0176837	0.235162	64546;25339;83516;24392;155430;24807;24834;79129;54237;24482;24498;29610;84007;29427;24890;24451;25203	Il12b;Npr3;Ppargc1a;Gja1;Hey2;Tacr1;Tk1;Cyba;Cdk1;Igf1;Il6;Tgfbr3;C3ar1;Aif1;Esr1;Hmox1;Ccnb1
GO:0050870	positive regulation of T cell activation	15	112	0.0176898	0.235162	64546;24498;353218;64545;56822;499342;24832;25704;361226;362076;24770;29427;688090;24482;309304	Il12b;Il6;Tnfsf9;Icos;Cd86;Cd274;Thy1;Il2ra;Cd83;Il36b;Ccl2;Aif1;RT1-Bb;Igf1;Pdcd1lg2
GO:0060441	epithelial tube branching involved in lung morphogenesis	6	27	0.0179612	0.23814	252929;116640;289229;687536;140586;25425	Ctsz;Tnc;Vangl2;Foxf1;Sox9;Ctsh
GO:0006928	cellular component movement	94	1071	0.0180792	0.239074	29597;24493;24310;245920;24392;286896;246118;29610;29290;498335;117551;117558;25453;304913;311723;289054;25694;50672;289229;294286;83781;117264;306636;25589;25728;170897;25054;24832;116637;306071;60582;81503;84032;306748;24770;25425;56765;116680;25732;24807;24883;114105;291081;287526;360918;293118;24212;25544;25542;117033;81687;117232;29427;29393;361244;114122;113959;25651;363060;688605;83516;301…	P2ry2;Il1a;Ace;Cxcl10;Gja1;Sgpl1;Tubb3;Tgfbr3;Adora1;Cxcl13;Ccl22;Mylk2;Gdnf;Tnn;Sox18;Aspm;Has2;Ednrb;Vangl2;Kifc1;Lgals3;P2ry6;Efnb2;Kdr;Apoe;Sphk1;Ntrk2;Thy1;Ccl4;Lcp1;Il1rn;Cxcl1;Col3a1;Cxcl14;Ccl2;Ctsh;Plvap;Ptpru;Acp5;Tacr1;Wt1;Cxcl2;Tubb2b;Serpinf1;Pf4;Prcp;Atp1a2;Sele;Ccl3;Mmp12;Mmp9;Barhl1;Aif1;Col1a1;RGD1307443;Vcan;C5ar1;Selp;Plet1;Ccl1;Ppargc1a;Trem1;Gcsam;Sox9;Cthrc1;Vil1;Pgr;Tek;Cxc…
GO:0050678	regulation of epithelial cell proliferation	25	222	0.0185592	0.244777	25728;25154;24498;117033;310621;24392;79129;29692;29610;24770;171112;113959;24807;191575;113936;29221;361303;24482;50672;287526;306636;367166;140586;29143;25589	Apoe;Pgr;Il6;Mmp12;Iqgap3;Gja1;Cyba;Pla2g2a;Tgfbr3;Ccl2;Wfdc1;C5ar1;Tacr1;Nme1;Cpb2;Arg1;Lims2;Igf1;Ednrb;Serpinf1;Efnb2;Hyal1;Sox9;Grn;Kdr
GO:0070482	response to oxygen levels	32	303	0.0188298	0.247696	25350;117038;25203;170913;25569;25375;364018;24310;24493;24648;24533;29610;83731;29290;24773;81687;24451;81707;29393;24191;89804;58966;63997;308099;24571;24787;25553;24770;83516;29452;24464;25589	Sftpd;Mt3;Ccnb1;Abcb1a;Trh;Aldh3a1;Ncf2;Ace;Il1a;Serpina1;Ldha;Tgfbr3;Kcnma1;Adora1;Sftpa1;Mmp9;Hmox1;Mmp14;Col1a1;Aldoc;Tek;Ramp2;Slc29a1;Fndc1;Muc1;Sod2;Slc6a4;Ccl2;Ppargc1a;Epas1;Hp;Kdr
GO:0034284	response to monosaccharide	22	189	0.0191786	0.251625	84403;64041;25569;24493;364018;24310;24392;24533;79129;363265;314386;25732;191575;25557;24787;287526;63997;25083;24464;113936;366949;25627	Gjb6;Birc5;Trh;Il1a;Ncf2;Ace;Gja1;Ldha;Cyba;Col4a3;Gpr68;Acp5;Nme1;Star;Sod2;Serpinf1;Slc29a1;Adra2a;Hp;Cpb2;Mafa;Cma1
GO:0010564	regulation of cell cycle process	35	339	0.0193268	0.252253	171576;304477;54237;117524;497672;25203;308768;360161;24571;64515;24493;315298;310344;296368;29427;684771;360243;315852;311546;289747;114494;314818;298884;360621;363227;24482;25515;83620;404640;311336;296137;64041;140586;309523;64625	Bub1b;Kntc1;Cdk1;Ccnf;Brca1;Ccnb1;Ticrr;Nek6;Muc1;Cdc20;Il1a;Racgap1;Plk4;Ube2c;Aif1;Cdca5;Top2a;Ttk;Tpx2;Osm;Ccna2;E2f7;Gen1;Cdc6;Nabp1;Igf1;Plk1;Cit;Mrgprx2;Nusap1;Bub1;Birc5;Sox9;Kif20b;Bid
GO:0055074	calcium ion homeostasis	31	292	0.0193269	0.252253	29597;25728;24832;25316;24212;25542;25503;24890;245920;24392;81503;79129;81869;84007;83567;365901;498335;305236;301066;113959;24807;117029;24770;114105;83504;89788;287562;50672;301086;288026;25589	P2ry2;Apoe;Thy1;Ms4a2;Atp1a2;Ccl3;Ocm2;Esr1;Cxcl10;Gja1;Cxcl1;Cyba;Gstm7;C3ar1;Mchr1;Gnat2;Cxcl13;Cxcl11;Ccr8;C5ar1;Tacr1;Ccr5;Ccl2;Cxcl2;Kl;Gna15;Ccl12;Ednrb;Xcr1;Atp13a4;Kdr
GO:0044283	small molecule biosynthetic process	36	351	0.0194299	0.25294	29592;25728;170897;140868;58835;114097;497672;83791;83792;246074;365345;59103;81726;89813;25017;25427;313339;29637;24962;58962;287424;58949;311569;170635;140910;25557;64191;24886;50671;50549;29244;89784;81639;54282;287877;680308	Bcat1;Apoe;Sphk1;Fabp5;Phgdh;Ltc4s;Brca1;Fdps;Scd;Scd1;Cyb5r2;Ptges;Mvd;Pdk4;Myo5a;Cyp51;Acer2;Hmgcs1;Cth;Hpgds;Aloxe3;Ptafr;Acss2;Dhrs9;Msmo1;Star;Dhcr7;Tbxas1;Fasn;Cyp4a1;Gch1;Idi1;Alox15;Padi1;Pycr1;Mthfd2
GO:0007052	mitotic spindle organization	7	36	0.0196191	0.254744	296344;171304;311546;315298;114482;25203;301701	Mybl2;Kif11;Tpx2;Racgap1;Nek2;Ccnb1;Ndc80
GO:0007088	regulation of mitosis	12	83	0.0197542	0.255837	83620;171576;360621;360161;296368;311336;64041;309523;298884;24493;24482;25515	Cit;Bub1b;Cdc6;Nek6;Ube2c;Nusap1;Birc5;Kif20b;Gen1;Il1a;Igf1;Plk1
GO:0072593	reactive oxygen species metabolic process	17	135	0.0198876	0.256903	117038;24787;79129;89813;266807;25732;293118;117254;24464;302976;100363502;66021;497672;113898;24599;364018;311374	Mt3;Sod2;Cyba;Pdk4;Duox1;Acp5;Prcp;Prdx1;Hp;Noxo1;LOC100363502;Cybb;Brca1;Prdx5;Nos2;Ncf2;Duoxa1
GO:0009314	response to radiation	35	340	0.0200259	0.257736	300795;289777;290326;25054;79431;24212;24213;499204;497672;308768;24493;81687;245920;367166;81503;84032;79129;29637;24770;365901;64546;500987;117029;363227;25557;24787;25383;29366;25364;114105;287561;60665;24464;691657;499870	Ns5atp9;Fignl1;Pbk;Ntrk2;Bhlhe40;Atp1a2;Atp1a3;Ddias;Brca1;Ticrr;Il1a;Mmp9;Cxcl10;Hyal1;Cxcl1;Col3a1;Cyba;Hmgcs1;Ccl2;Gnat2;Il12b;H2afx;Ccr5;Nabp1;Star;Sod2;Apobec1;Serpine2;Asic2;Cxcl2;Ccl7;Cxcl6;Hp;Crip1;Rad51
GO:0050764	regulation of phagocytosis	8	45	0.0200547	0.257736	689388;25350;289211;81639;24770;24232;24773;406161	Ptx3;Sftpd;Fcgr2b;Alox15;Ccl2;C3;Sftpa1;C4b
GO:0034599	cellular response to oxidative stress	20	168	0.0203201	0.259871	24498;25524;83516;170897;266807;54237;362510;29452;117254;24464;499204;24787;29427;24773;29221;113898;170496;24451;117038;287877	Il6;Psap;Ppargc1a;Sphk1;Duox1;Cdk1;Melk;Epas1;Prdx1;Hp;Ddias;Sod2;Aif1;Sftpa1;Arg1;Prdx5;Lcn2;Hmox1;Mt3;Pycr1
GO:0032770	positive regulation of monooxygenase activity	5	20	0.0203242	0.259871	25453;29244;25339;24890;25728	Gdnf;Gch1;Npr3;Esr1;Apoe
GO:0006874	cellular calcium ion homeostasis	30	282	0.0206108	0.26161	29597;25728;24832;25316;24212;25542;25503;24890;245920;24392;81503;79129;81869;84007;83567;365901;498335;305236;301066;113959;24807;117029;24770;114105;89788;287562;50672;301086;288026;25589	P2ry2;Apoe;Thy1;Ms4a2;Atp1a2;Ccl3;Ocm2;Esr1;Cxcl10;Gja1;Cxcl1;Cyba;Gstm7;C3ar1;Mchr1;Gnat2;Cxcl13;Cxcl11;Ccr8;C5ar1;Tacr1;Ccr5;Ccl2;Cxcl2;Gna15;Ccl12;Ednrb;Xcr1;Atp13a4;Kdr
GO:0006935	chemotaxis	34	329	0.0206319	0.26161	685243;116637;25542;24232;245920;246118;360579;306748;29427;498335;305236;117551;116720;301066;113959;58949;117029;688605;24770;114105;301229;287562;50672;301086;287561;83781;60665;360918;306636;81503;84007;114090;25589;100124593	Ackr4;Ccl4;Ccl3;C3;Cxcl10;Tubb3;Ccl9;Cxcl14;Aif1;Cxcl13;Cxcl11;Ccl22;Pik3c2g;Ccr8;C5ar1;Ptafr;Ccr5;Ccl1;Ccl2;Cxcl2;Trem1;Ccl12;Ednrb;Xcr1;Ccl7;Lgals3;Cxcl6;Pf4;Efnb2;Cxcl1;C3ar1;Egr2;Kdr;Cxcr6
GO:0034453	microtubule anchoring	6	28	0.0206456	0.26161	315298;311325;114482;311327;25203;301701	Racgap1;Knstrn;Nek2;Casc5;Ccnb1;Ndc80
GO:0034614	cellular response to reactive oxygen species	14	104	0.0206685	0.26161	24498;25524;170897;266807;54237;117254;24464;24787;29221;113898;170496;24773;117038;287877	Il6;Psap;Sphk1;Duox1;Cdk1;Prdx1;Hp;Sod2;Arg1;Prdx5;Lcn2;Sftpa1;Mt3;Pycr1
GO:0051130	positive regulation of cellular component organization	58	622	0.0210686	0.264605	29597;25350;292060;170897;25054;64515;64625;25544;60665;497672;25203;81819;24232;24493;117258;24571;25728;29465;680522;310344;192211;24251;292406;54227;81820;24770;24773;170496;29393;498335;89804;84510;24807;191575;25453;311336;301227;299242;29186;25364;60350;29366;24482;25515;689388;83516;362235;29455;289211;287526;81639;367166;140586;113936;29143;25589;316521;406161	P2ry2;Sftpd;Irf8;Sphk1;Ntrk2;Cdc20;Bid;Sele;Cxcl6;Brca1;Ccnb1;Pax8;C3;Il1a;Cntn1;Muc1;Apoe;Trpv2;Hist1h1b;Plk4;Prom2;Cd53;Thbs2;Arpc1b;Doc2b;Ccl2;Sftpa1;Lcn2;Col1a1;Cxcl13;Tek;Stmn2;Tacr1;Nme1;Gdnf;Nusap1;Trem2;Gpr65;Cd63;Asic2;Cd14;Serpine2;Igf1;Plk1;Ptx3;Ppargc1a;Syndig1;Gdf15;Fcgr2b;Serpinf1;Alox15;Hyal1;Sox9;Cpb2;Grn;Kdr;Vil1;C4b
GO:0006909	phagocytosis	13	94	0.0210779	0.264605	689388;25350;292060;289211;100362805;171569;81639;24770;266714;29427;24232;24773;406161	Ptx3;Sftpd;Irf8;Fcgr2b;Txndc5;Spon2;Alox15;Ccl2;Myo7a;Aif1;C3;Sftpa1;C4b
GO:0071397	cellular response to cholesterol	4	13	0.0211684	0.264605	315215;29200;29637;25728	Mlc1;Inhba;Hmgcs1;Apoe
GO:0033591	response to L-ascorbic acid	4	13	0.0211684	0.264605	24464;24787;24493;25732	Hp;Sod2;Il1a;Acp5
GO:0030449	regulation of complement activation	4	13	0.0211684	0.264605	100911545;295703;24232;24237	LOC100911545;Serping1;C3;C6
GO:0043069	negative regulation of programmed cell death	52	548	0.0212829	0.264924	64557;81819;25728;289777;25054;54237;24498;499204;25364;81680;117038;294071;24649;60582;25154;170897;24770;63865;24962;29290;113898;25425;24451;89804;58966;155430;24832;113959;116510;117029;25453;25557;24787;29427;117232;361303;24482;25572;25515;24883;83516;50672;24366;24367;64041;50692;81639;140586;679787;114090;25589;89813	Bard1;Pax8;Apoe;Fignl1;Ntrk2;Cdk1;Il6;Ddias;Asic2;Lifr;Mt3;Hells;Pim1;Il1rn;Pgr;Sphk1;Ccl2;Lgmn;Cth;Adora1;Prdx5;Ctsh;Hmox1;Tek;Ramp2;Hey2;Thy1;C5ar1;Timp1;Ccr5;Gdnf;Star;Sod2;Aif1;Barhl1;Lims2;Igf1;Tnfrsf4;Plk1;Wt1;Ppargc1a;Ednrb;Fgb;Fgg;Birc5;Plaur;Alox15;Sox9;Clec5a;Egr2;Kdr;Pdk4
GO:0071822	protein complex subunit organization	98	1131	0.0212994	0.264924	689399;29213;315215;100912290;24392;246118;315298;296368;29610;24962;83731;24191;89804;298850;299242;24787;289054;100360950;113910;83620;294286;81639;58814;24834;500590;54237;304648;365377;25203;291675;306071;296344;50665;680522;84032;79129;140586;24778;24904;84510;680097;294269;24807;29221;316521;308064;24366;24367;291081;360918;362720;29437;65178;500377;292060;291159;301701;81682;81687;26989;31…	Cenpw;Tubb4a;Mlc1;LOC100912290;Gja1;Tubb3;Racgap1;Ube2c;Tgfbr3;Cth;Kcnma1;Aldoc;Tek;Cenpa;Gpr65;Sod2;Aspm;LOC100360950;Prnd;Cit;Kifc1;Alox15;Tmod2;Tk1;Tnfrsf9;Cdk1;Asf1b;Trim72;Ccnb1;Mzb1;Lcp1;Mybl2;Tmsb10;Hist1h1b;Col3a1;Cyba;Sox9;Slc2a1;Slc22a1;Stmn2;LOC680097;RT1-Da;Tacr1;Arg1;Vil1;Cep72;Fgb;Fgg;Tubb2b;Pf4;Rrm2;Acta1;Snap91;Tuba8;Irf8;Hist1h2ail;Ndc80;Lum;Mmp9;Cadps;Knstrn;Arpc1b;Aif1;Chaf1b;H…
GO:0042330	taxis	34	330	0.0213821	0.264977	685243;116637;25542;24232;245920;246118;360579;306748;29427;498335;305236;117551;116720;301066;113959;58949;117029;688605;24770;114105;301229;287562;50672;301086;287561;83781;60665;360918;306636;81503;84007;114090;25589;100124593	Ackr4;Ccl4;Ccl3;C3;Cxcl10;Tubb3;Ccl9;Cxcl14;Aif1;Cxcl13;Cxcl11;Ccl22;Pik3c2g;Ccr8;C5ar1;Ptafr;Ccr5;Ccl1;Ccl2;Cxcl2;Trem1;Ccl12;Ednrb;Xcr1;Ccl7;Lgals3;Cxcl6;Pf4;Efnb2;Cxcl1;C3ar1;Egr2;Kdr;Cxcr6
GO:2000026	regulation of multicellular organismal development	102	1183	0.0214091	0.264977	29597;81819;24498;84387;24493;100912290;310621;245920;24392;29465;315691;29610;54264;89804;117092;58966;314386;292935;25453;29200;289054;100360950;311374;83620;361537;50672;289229;306636;25589;362634;25728;170897;25054;54237;25203;117258;60582;84032;306748;24770;24310;84510;680097;56822;89824;24883;362235;287526;360918;64515;497979;297077;25627;170568;25704;117038;25542;24890;81687;353218;292406;…	P2ry2;Pax8;Il6;Pglyrp1;Il1a;LOC100912290;Iqgap3;Cxcl10;Gja1;Trpv2;Lingo1;Tgfbr3;Mafb;Tek;Serpinb7;Ramp2;Gpr68;Htatip2;Gdnf;Inhba;Aspm;LOC100360950;Duoxa1;Cit;Tyrobp;Ednrb;Vangl2;Efnb2;Kdr;C1qc;Apoe;Sphk1;Ntrk2;Cdk1;Ccnb1;Cntn1;Il1rn;Col3a1;Cxcl14;Ccl2;Ace;Stmn2;LOC680097;Cd86;Chi3l1;Wt1;Syndig1;Serpinf1;Pf4;Cdc20;Tmem100;Tmem176a;Cma1;Dmbt1;Il2ra;Mt3;Ccl3;Esr1;Mmp9;Tnfsf9;Thbs2;Hmox1;Col1a1;RGD13…
GO:0006636	unsaturated fatty acid biosynthetic process	7	37	0.0220634	0.271072	58962;287424;170897;114097;81639;24886;59103	Hpgds;Aloxe3;Sphk1;Ltc4s;Alox15;Tbxas1;Ptges
GO:0055078	sodium ion homeostasis	7	37	0.0220634	0.271072	50672;315190;289596;24807;24212;24213;29290	Ednrb;Upk3a;Corin;Tacr1;Atp1a2;Atp1a3;Adora1
GO:0007622	rhythmic behavior	7	37	0.0220634	0.271072	114090;24950;24498;25557;84387;83731;29290	Egr2;Srd5a1;Il6;Star;Pglyrp1;Kcnma1;Adora1
GO:0016192	vesicle-mediated transport	72	800	0.0221286	0.271211	499264;498638;294335;25350;684984;25316;170568;245955;293591;685243;24953;59267;25544;296654;25542;315215;24232;191575;29427;292060;79126;26989;302538;289211;25017;289596;65046;192211;25728;60566;300027;81820;367074;85266;288504;24773;291597;24451;501854;365377;50592;58966;299339;687536;25046;171569;170824;117558;81511;29186;298504;24770;60350;192249;80977;689388;287562;310693;298943;24366;24367;…	Apobr;Msr1;Susd2;Sftpd;Cd300lg;Ms4a2;Dmbt1;Lgals3bp;Cd163l1;Ackr4;Gcgr;Syt7;Sele;Gsn;Ccl3;Mlc1;C3;Nme1;Aif1;Irf8;Cfi;Cadps;Sytl5;Fcgr2b;Myo5a;Corin;Ap2s1;Prom2;Apoe;Syt8;Gpihbp1;Doc2b;Tmprss4;Prss12;Snx8;Sftpa1;Trim36;Hmox1;Rab7b;Trim72;Gria1;Ramp2;Tnfaip2;Foxf1;Pigr;Spon2;Steap3;Mylk2;Lat;Cd63;Mfsd2a;Ccl2;Cd14;Ehd3;Syt13;Ptx3;Ccl12;Cd5l;Bcap29;Fgb;Fgg;Lgals3;Txndc5;Adra2a;Alox15;Lat2;Scamp5;Grn;…
GO:0030593	neutrophil chemotaxis	8	46	0.0222455	0.271319	84007;81503;113959;83781;25542;24770;114105;301229	C3ar1;Cxcl1;C5ar1;Lgals3;Ccl3;Ccl2;Cxcl2;Trem1
GO:0002690	positive regulation of leukocyte chemotaxis	8	46	0.0222455	0.271319	498335;245920;84007;287561;24770;116637;25542;29427	Cxcl13;Cxcl10;C3ar1;Ccl7;Ccl2;Ccl4;Ccl3;Aif1
GO:0006810	transport	245	3085	0.0224606	0.272226	29597;85497;81819;293650;499342;317676;293154;29599;24498;113901;289949;315215;303772;24493;684984;245920;50719;24392;353250;29465;29695;140868;315298;315611;300027;362474;83731;85266;29290;29292;498840;365042;89804;293591;24904;314386;191573;65161;117558;191575;25453;29200;60566;24770;298504;60350;362861;25694;311374;50676;79217;50672;25544;83781;117264;79126;81639;58812;366949;498638;685243;255…	P2ry2;Klf15;Pax8;Tcirg1;Cd274;Lat2;Folr2;Atp2b3;Il6;Chia;Fam3d;Mlc1;Slc16a6;Il1a;Cd300lg;Cxcl10;Slc7a5;Gja1;Niacr1;Trpv2;Gabrr2;Fabp5;Racgap1;Scn4b;Gpihbp1;Adhfe1;Kcnma1;Prss12;Adora1;Ftl1;Tmem173;Rab32;Tek;Cd163l1;Slc22a1;Gpr68;Grin3a;Litaf;Mylk2;Nme1;Gdnf;Inhba;Syt8;Ccl2;Mfsd2a;Cd14;Slc41a2;Has2;Duoxa1;Slc6a12;Gja3;Ednrb;Sele;Lgals3;P2ry6;Cfi;Alox15;Apln;Mafa;Msr1;Ackr4;Psap;Sftpd;Unc93b1;Clic1…
GO:0090132	epithelium migration	18	148	0.0224824	0.272226	498335;89804;25728;287526;311723;24807;29610;293118;306636;367166;140586;117029;29186;25589;316521;25425;65048;81687	Cxcl13;Tek;Apoe;Serpinf1;Sox18;Tacr1;Tgfbr3;Prcp;Efnb2;Hyal1;Sox9;Ccr5;Cd63;Kdr;Vil1;Ctsh;Fat2;Mmp9
GO:0010631	epithelial cell migration	18	148	0.0224824	0.272226	498335;89804;25728;287526;311723;24807;29610;293118;306636;367166;140586;117029;29186;25589;316521;25425;65048;81687	Cxcl13;Tek;Apoe;Serpinf1;Sox18;Tacr1;Tgfbr3;Prcp;Efnb2;Hyal1;Sox9;Ccr5;Cd63;Kdr;Vil1;Ctsh;Fat2;Mmp9
GO:0055067	monovalent inorganic cation homeostasis	13	95	0.0225866	0.27283	50672;89813;289237;29440;24807;315190;117596;24212;24213;289596;83731;29290;317170	Ednrb;Pdk4;Slamf8;Slc26a4;Tacr1;Upk3a;Atp6v1b2;Atp1a2;Atp1a3;Corin;Kcnma1;Adora1;Slc9a7
GO:0009914	hormone transport	26	238	0.0226414	0.272837	289949;81819;59267;64041;170913;25569;25017;60582;24392;353250;80900;81820;24904;29290;360034;314386;289747;24807;29200;25027;24498;24366;24367;25083;58812;366949	Fam3d;Pax8;Syt7;Birc5;Abcb1a;Trh;Myo5a;Il1rn;Gja1;Niacr1;Slco1a5;Doc2b;Slc22a1;Adora1;Myrip;Gpr68;Osm;Tacr1;Inhba;Slc16a1;Il6;Fgb;Fgg;Adra2a;Apln;Mafa
GO:0043615	astrocyte cell migration	3	7	0.0230796	0.274822	24770;81707;25542	Ccl2;Mmp14;Ccl3
GO:1901072	glucosamine-containing compound catabolic process	3	7	0.0230796	0.274822	89824;113901;683570	Chi3l1;Chia;Gnpda1
GO:0002363	alpha-beta T cell lineage commitment	3	7	0.0230796	0.274822	24498;291100;299206	Il6;Irf4;Batf
GO:0090239	regulation of histone H4 acetylation	3	7	0.0230796	0.274822	497672;24571;366126	Brca1;Muc1;Spi1
GO:0072124	regulation of glomerular mesangial cell proliferation	3	7	0.0230796	0.274822	24883;117092;84007	Wt1;Serpinb7;C3ar1
GO:0030001	metal ion transport	58	626	0.0233167	0.275831	25334;170899;29366;24832;25316;29599;684516;24213;116637;65199;287106;25542;117258;117038;24310;245920;259243;24392;29465;81503;25017;79129;100909725;24770;315611;306811;100362384;83731;29290;29639;317170;83567;24777;305236;58966;191573;116649;117029;50599;170824;25349;100360087;29186;25364;365391;24482;306009;116745;29292;287562;301086;29571;83781;24212;81869;116695;64120;84396	Bhlha15;Kcnk2;Serpine2;Thy1;Ms4a2;Atp2b3;Kcnc4;Atp1a3;Ccl4;Kcnip3;Prss30;Ccl3;Cntn1;Mt3;Ace;Cxcl10;Kcnip4;Gja1;Trpv2;Cxcl1;Myo5a;Cyba;LOC100909725;Ccl2;Scn4b;Wnk2;LOC100362384;Kcnma1;Adora1;Fxyd2;Slc9a7;Mchr1;Slc10a1;Cxcl11;Ramp2;Grin3a;Kcnj4;Ccr5;Kcnj3;Steap3;Scn2b;LOC100360087;Cd63;Asic2;Trpm5;Igf1;Slc39a14;Kcnh6;Ftl1;Ccl12;Xcr1;Scn10a;Lgals3;Atp1a2;Gstm7;Kcnd1;Kcnk13;Atp1b4
GO:0050670	regulation of lymphocyte proliferation	17	138	0.0235795	0.275831	64546;499342;353218;25350;56822;289211;83781;24807;25704;24498;679975;304988;29427;291675;24482;25572;309304	Il12b;Cd274;Tnfsf9;Sftpd;Cd86;Fcgr2b;Lgals3;Tacr1;Il2ra;Il6;Gpr183;Mnda;Aif1;Mzb1;Igf1;Tnfrsf4;Pdcd1lg2
GO:0050708	regulation of protein secretion	17	138	0.0235795	0.275831	499342;89804;60350;303666;113901;24366;24367;500590;117029;24498;25542;679787;65171;305355;100360977;24493;25572	Cd274;Tek;Cd14;RGD1561778;Chia;Fgb;Fgg;Tnfrsf9;Ccr5;Il6;Ccl3;Clec5a;Scamp5;Tlr10;LOC100360977;Il1a;Tnfrsf4
GO:0032944	regulation of mononuclear cell proliferation	17	138	0.0235795	0.275831	64546;499342;353218;25350;56822;289211;83781;24807;25704;24498;679975;304988;29427;291675;24482;25572;309304	Il12b;Cd274;Tnfsf9;Sftpd;Cd86;Fcgr2b;Lgals3;Tacr1;Il2ra;Il6;Gpr183;Mnda;Aif1;Mzb1;Igf1;Tnfrsf4;Pdcd1lg2
GO:0015991	ATP hydrolysis coupled proton transport	6	29	0.0235891	0.275831	293650;117596;24212;24213;297932;685232	Tcirg1;Atp6v1b2;Atp1a2;Atp1a3;Atp6v0d2;Atp6v1a
GO:0070372	regulation of ERK1 and ERK2 cascade	18	149	0.0237217	0.275831	81639;89804;691993;89824;24367;301227;24366;24482;24498;679975;306811;25542;25589;24232;24493;24890;113959;117038	Alox15;Tek;Scimp;Chi3l1;Fgg;Trem2;Fgb;Igf1;Il6;Gpr183;Wnk2;Ccl3;Kdr;C3;Il1a;Esr1;C5ar1;Mt3
GO:0001666	response to hypoxia	29	274	0.0237603	0.275831	117038;25203;170913;25569;25375;24571;24310;24493;24648;24533;29610;83731;29290;24773;81687;24451;81707;24191;89804;58966;63997;308099;24787;25553;24770;83516;29452;24464;25589	Mt3;Ccnb1;Abcb1a;Trh;Aldh3a1;Muc1;Ace;Il1a;Serpina1;Ldha;Tgfbr3;Kcnma1;Adora1;Sftpa1;Mmp9;Hmox1;Mmp14;Aldoc;Tek;Ramp2;Slc29a1;Fndc1;Sod2;Slc6a4;Ccl2;Ppargc1a;Epas1;Hp;Kdr
GO:0006690	icosanoid metabolic process	9	56	0.0237905	0.275831	58962;287424;79242;170897;50549;114097;81639;24886;59103	Hpgds;Aloxe3;Hpgd;Sphk1;Cyp4a1;Ltc4s;Alox15;Tbxas1;Ptges
GO:1901568	fatty acid derivative metabolic process	9	56	0.0237905	0.275831	58962;287424;79242;170897;50549;114097;81639;24886;59103	Hpgds;Aloxe3;Hpgd;Sphk1;Cyp4a1;Ltc4s;Alox15;Tbxas1;Ptges
GO:0043277	apoptotic cell clearance	5	21	0.0238547	0.275831	81639;24770;24232;100362805;406161	Alox15;Ccl2;C3;Txndc5;C4b
GO:0030212	hyaluronan metabolic process	5	21	0.0238547	0.275831	25589;306251;24649;25694;367166	Kdr;Itih1;Pim1;Has2;Hyal1
GO:0006026	aminoglycan catabolic process	5	21	0.0238547	0.275831	89824;113901;293186;84387;367166	Chi3l1;Chia;Lyve1;Pglyrp1;Hyal1
GO:0006915	apoptotic process	106	1241	0.0238779	0.275831	81819;89813;24498;113901;24493;24310;286894;353250;286896;304988;24962;83731;29290;24191;89804;360243;58966;65161;362510;25453;29200;24787;364018;25515;24383;50672;83781;294071;81639;25589;25728;25059;25054;54237;64041;24571;60582;24770;81687;89824;311426;170824;316521;24392;24883;361514;691998;24367;50692;679787;171576;289777;25704;117038;65199;25542;81680;360161;24890;25425;117232;170897;313339…	Pax8;Pdk4;Il6;Chia;Il1a;Ace;Parm1;Niacr1;Sgpl1;Mnda;Cth;Kcnma1;Adora1;Aldoc;Tek;Top2a;Ramp2;Litaf;Melk;Gdnf;Inhba;Sod2;Ncf2;Plk1;Gapdh;Ednrb;Lgals3;Hells;Alox15;Kdr;Apoe;Hk2;Ntrk2;Cdk1;Birc5;Muc1;Il1rn;Ccl2;Mmp9;Chi3l1;Siglec1;Steap3;Vil1;Gja1;Wt1;Meis3;Nlrp1b;Fgg;Plaur;Clec5a;Bub1b;Fignl1;Il2ra;Mt3;Kcnip3;Ccl3;Lifr;Nek6;Esr1;Ctsh;Barhl1;Sphk1;Acer2;Aif1;Nos2;Hmox1;Sdf2l1;Gjb6;Cstb;Thy1;C5ar1;Osm…
GO:0050865	regulation of cell activation	32	310	0.0243917	0.28112	362076;499342;25350;25728;24832;25316;25704;24498;679975;84387;688090;291675;353218;289211;304988;29427;84492;24451;64546;64545;56822;25651;687536;24807;361226;81511;29366;24770;24482;25572;83781;309304	Il36b;Cd274;Sftpd;Apoe;Thy1;Ms4a2;Il2ra;Il6;Gpr183;Pglyrp1;RT1-Bb;Mzb1;Tnfsf9;Fcgr2b;Mnda;Aif1;Tec;Hmox1;Il12b;Icos;Cd86;Selp;Foxf1;Tacr1;Cd83;Lat;Serpine2;Ccl2;Igf1;Tnfrsf4;Lgals3;Pdcd1lg2
GO:0030850	prostate gland development	8	47	0.0245996	0.282383	25524;116640;287526;50692;140586;691657;24890;24482	Psap;Tnc;Serpinf1;Plaur;Sox9;Crip1;Esr1;Igf1
GO:0071333	cellular response to glucose stimulus	12	86	0.0246137	0.282383	84403;314386;79129;287526;63997;191575;25083;25557;64041;113936;25627;24310	Gjb6;Gpr68;Cyba;Serpinf1;Slc29a1;Nme1;Adra2a;Star;Birc5;Cpb2;Cma1;Ace
GO:0051783	regulation of nuclear division	14	107	0.0250917	0.287211	83620;171576;360621;360161;289747;64515;296368;311336;64041;309523;298884;24493;24482;25515	Cit;Bub1b;Cdc6;Nek6;Osm;Cdc20;Ube2c;Nusap1;Birc5;Kif20b;Gen1;Il1a;Igf1;Plk1
GO:0042981	regulation of apoptotic process	88	1011	0.0252835	0.288749	81819;89813;24498;24310;353250;304988;24962;83731;29290;89804;360243;58966;362510;25453;29200;24787;364018;25515;50672;83781;294071;81639;25589;25728;170897;25054;54237;64041;24571;60582;24770;81687;311426;170824;316521;24883;361514;691998;24367;360918;679787;289777;117038;65199;25542;81680;24890;25425;117232;313339;29427;24599;24451;680945;25308;24832;113959;289747;116510;117029;25557;296137;243…	Pax8;Pdk4;Il6;Ace;Niacr1;Mnda;Cth;Kcnma1;Adora1;Tek;Top2a;Ramp2;Melk;Gdnf;Inhba;Sod2;Ncf2;Plk1;Ednrb;Lgals3;Hells;Alox15;Kdr;Apoe;Sphk1;Ntrk2;Cdk1;Birc5;Muc1;Il1rn;Ccl2;Mmp9;Siglec1;Steap3;Vil1;Wt1;Meis3;Nlrp1b;Fgg;Pf4;Clec5a;Fignl1;Mt3;Kcnip3;Ccl3;Lifr;Esr1;Ctsh;Barhl1;Acer2;Aif1;Nos2;Hmox1;Sdf2l1;Cstb;Thy1;C5ar1;Osm;Timp1;Ccr5;Star;Bub1;Fgb;Sox9;Bid;Ubd;Bard1;Pgr;Ddias;Brca1;Plaur;Frzb;C6;Ldha;…
GO:1903530	regulation of secretion by cell	44	456	0.0254575	0.289886	499342;289949;81819;170897;25054;25316;24498;113901;64041;25542;25569;24493;25017;60582;24392;353250;81820;29290;24451;687536;58812;360034;89804;500590;303666;314386;305355;289747;24807;117029;29200;113936;100360977;25027;60350;25572;26989;684516;59267;24367;25083;24366;679787;65171	Cd274;Fam3d;Pax8;Sphk1;Ntrk2;Ms4a2;Il6;Chia;Birc5;Ccl3;Trh;Il1a;Myo5a;Il1rn;Gja1;Niacr1;Doc2b;Adora1;Hmox1;Foxf1;Apln;Myrip;Tek;Tnfrsf9;RGD1561778;Gpr68;Tlr10;Osm;Tacr1;Ccr5;Inhba;Cpb2;LOC100360977;Slc16a1;Cd14;Tnfrsf4;Cadps;Kcnc4;Syt7;Fgg;Adra2a;Fgb;Clec5a;Scamp5
GO:0044057	regulation of system process	35	347	0.0254984	0.289886	29597;170897;289596;24212;83791;25542;24493;25349;24392;353250;311167;79129;315611;83731;29290;24599;155430;140939;117558;24807;29200;24886;29427;25364;24482;24498;50672;24366;29571;29452;25083;58812;24367;25589;50654	P2ry2;Sphk1;Corin;Atp1a2;Fdps;Ccl3;Il1a;Scn2b;Gja1;Niacr1;Smtnl1;Cyba;Scn4b;Kcnma1;Adora1;Nos2;Hey2;Trim63;Mylk2;Tacr1;Inhba;Tbxas1;Aif1;Asic2;Igf1;Il6;Ednrb;Fgb;Scn10a;Epas1;Adra2a;Apln;Fgg;Kdr;Ctss
GO:0071361	cellular response to ethanol	4	14	0.0258513	0.29061	64041;24787;366126;287561	Birc5;Sod2;Spi1;Ccl7
GO:0051000	positive regulation of nitric-oxide synthase activity	4	14	0.0258513	0.29061	29244;25339;24890;25728	Gch1;Npr3;Esr1;Apoe
GO:0036315	cellular response to sterol	4	14	0.0258513	0.29061	315215;29200;29637;25728	Mlc1;Inhba;Hmgcs1;Apoe
GO:0055075	potassium ion homeostasis	4	14	0.0258513	0.29061	24212;24213;83731;315190	Atp1a2;Atp1a3;Kcnma1;Upk3a
GO:2000257	regulation of protein activation cascade	4	14	0.0258513	0.29061	100911545;295703;24232;24237	LOC100911545;Serping1;C3;C6
GO:0051341	regulation of oxidoreductase activity	9	57	0.0260147	0.291795	117038;25728;289237;29244;25339;25453;24464;113898;24890	Mt3;Apoe;Slamf8;Gch1;Npr3;Gdnf;Hp;Prdx5;Esr1
GO:0008285	negative regulation of cell proliferation	43	445	0.026397	0.294943	499342;310486;25728;84403;25339;24832;25704;24498;290644;25350;24493;24890;59103;295691;81687;24392;289211;29427;29692;304988;306811;29610;24962;29290;24451;64546;116680;117029;24883;314818;29200;113936;25553;29366;361303;24482;287526;171112;306636;367166;140586;24787;309304	Cd274;Rarres1;Apoe;Gjb6;Npr3;Thy1;Il2ra;Il6;Ifi30;Sftpd;Il1a;Esr1;Ptges;Frzb;Mmp9;Gja1;Fcgr2b;Aif1;Pla2g2a;Mnda;Wnk2;Tgfbr3;Cth;Adora1;Hmox1;Il12b;Ptpru;Ccr5;Wt1;E2f7;Inhba;Cpb2;Slc6a4;Serpine2;Lims2;Igf1;Serpinf1;Wfdc1;Efnb2;Hyal1;Sox9;Sod2;Pdcd1lg2
GO:1903035	negative regulation of response to wounding	12	87	0.0264128	0.294943	64546;24392;289211;287526;290326;687536;25732;25704;316842;84387;29290;25728	Il12b;Gja1;Fcgr2b;Serpinf1;Pbk;Foxf1;Acp5;Il2ra;Metrnl;Pglyrp1;Adora1;Apoe
GO:0050728	negative regulation of inflammatory response	11	77	0.0267191	0.295987	64546;25728;289211;287526;290326;687536;25732;25704;316842;84387;29290	Il12b;Apoe;Fcgr2b;Serpinf1;Pbk;Foxf1;Acp5;Il2ra;Metrnl;Pglyrp1;Adora1
GO:0003073	regulation of systemic arterial blood pressure	11	77	0.0267191	0.295987	24392;289596;79129;24807;293118;54242;24787;100360872;25364;29290;24310	Gja1;Corin;Cyba;Tacr1;Prcp;Cpa3;Sod2;Mcpt1l1;Asic2;Adora1;Ace
GO:0015988	energy coupled proton transmembrane transport, against electrochemical gradient	6	30	0.0268008	0.295987	293650;117596;24212;24213;297932;685232	Tcirg1;Atp6v1b2;Atp1a2;Atp1a3;Atp6v0d2;Atp6v1a
GO:0050931	pigment cell differentiation	6	30	0.0268008	0.295987	365042;50672;24787;29186;25017;501162	Rab32;Ednrb;Sod2;Cd63;Myo5a;Mreg
GO:0002448	mast cell mediated immunity	6	30	0.0268008	0.295987	317676;687536;25316;171569;81511;24451	Lat2;Foxf1;Ms4a2;Spon2;Lat;Hmox1
GO:0009410	response to xenobiotic stimulus	8	48	0.0271223	0.29888	287610;246245;81869;83783;25086;25557;54246;54349	Lpo;Fmo2;Gstm7;Sult1a1;Cyp2e1;Star;Cyp2f4;Aox1
GO:0007568	aging	29	278	0.0276501	0.30071	29597;25728;84403;25054;54237;24498;296654;25375;364018;24310;83504;84032;295703;24770;81687;24599;24191;360243;56822;500987;65161;116510;117029;24787;29221;50672;29687;287526;25589	P2ry2;Apoe;Gjb6;Ntrk2;Cdk1;Il6;Gsn;Aldh3a1;Ncf2;Ace;Kl;Col3a1;Serping1;Ccl2;Mmp9;Nos2;Aldoc;Top2a;Cd86;H2afx;Litaf;Timp1;Ccr5;Sod2;Arg1;Ednrb;C1qb;Serpinf1;Kdr
GO:0031349	positive regulation of defense response	18	152	0.0277512	0.30071	64546;501854;24392;56822;305355;498840;291100;58949;117029;24498;84387;81743;25542;499926;24232;24310;50654;361689	Il12b;Rab7b;Gja1;Cd86;Tlr10;Tmem173;Irf4;Ptafr;Ccr5;Il6;Pglyrp1;Pde2a;Ccl3;Bpifb1;C3;Ace;Ctss;Unc93b1
GO:0071392	cellular response to estradiol stimulus	5	22	0.027757	0.30071	170913;24890;58940;25033;24950	Abcb1a;Esr1;H2afz;Sstr1;Srd5a1
GO:0002548	monocyte chemotaxis	5	22	0.027757	0.30071	29427;83781;24770;287562;25542	Aif1;Lgals3;Ccl2;Ccl12;Ccl3
GO:0042554	superoxide anion generation	5	22	0.027757	0.30071	24787;79129;25732;66021;364018	Sod2;Cyba;Acp5;Cybb;Ncf2
GO:1901071	glucosamine-containing compound metabolic process	5	22	0.027757	0.30071	89824;113901;307859;683570;302972	Chi3l1;Chia;Chst5;Gnpda1;Amdhd2
GO:0071383	cellular response to steroid hormone stimulus	17	141	0.027767	0.30071	24498;58940;25154;299210;140939;24212;287526;24950;24795;24770;25453;25557;24614;170913;29221;24890;25033	Il6;H2afz;Pgr;Esrrb;Trim63;Atp1a2;Serpinf1;Srd5a1;Serpina3n;Ccl2;Gdnf;Star;Orm1;Abcb1a;Arg1;Esr1;Sstr1
GO:0070663	regulation of leukocyte proliferation	17	141	0.027767	0.30071	64546;499342;353218;25350;56822;289211;83781;24807;25704;24498;679975;304988;29427;291675;24482;25572;309304	Il12b;Cd274;Tnfsf9;Sftpd;Cd86;Fcgr2b;Lgals3;Tacr1;Il2ra;Il6;Gpr183;Mnda;Aif1;Mzb1;Igf1;Tnfrsf4;Pdcd1lg2
GO:0071331	cellular response to hexose stimulus	12	88	0.0283058	0.305885	84403;314386;79129;287526;63997;191575;25083;25557;64041;113936;25627;24310	Gjb6;Gpr68;Cyba;Serpinf1;Slc29a1;Nme1;Adra2a;Star;Birc5;Cpb2;Cma1;Ace
GO:0008284	positive regulation of cell proliferation	58	634	0.0283869	0.306103	25154;25054;64515;25704;24498;679975;25203;81680;24770;25375;24890;310621;245920;81726;353218;117033;117092;170897;367166;266813;79129;362720;24482;313339;116510;29427;25425;24451;360711;64546;291675;687536;116640;56822;54237;113959;289747;24807;363672;191575;114494;282836;289054;29221;25694;25572;83516;50672;84007;155430;81639;64536;140586;58812;29143;25589;292301;309304	Pgr;Ntrk2;Cdc20;Il2ra;Il6;Gpr183;Ccnb1;Lifr;Ccl2;Aldh3a1;Esr1;Iqgap3;Cxcl10;Mvd;Tnfsf9;Mmp12;Serpinb7;Sphk1;Hyal1;Prrx1;Cyba;Rrm2;Igf1;Acer2;Timp1;Aif1;Ctsh;Hmox1;RGD1310335;Il12b;Mzb1;Foxf1;Tnc;Cd86;Cdk1;C5ar1;Osm;Tacr1;Sp6;Nme1;Ccna2;Cthrc1;Aspm;Arg1;Has2;Tnfrsf4;Ppargc1a;Ednrb;C3ar1;Hey2;Alox15;Esm1;Sox9;Apln;Grn;Kdr;T;Pdcd1lg2
GO:0036293	response to decreased oxygen levels	29	279	0.0286952	0.308183	117038;25203;170913;25569;25375;24571;24310;24493;24648;24533;29610;83731;29290;24773;81687;24451;81707;24191;89804;58966;63997;308099;24787;25553;24770;83516;29452;24464;25589	Mt3;Ccnb1;Abcb1a;Trh;Aldh3a1;Muc1;Ace;Il1a;Serpina1;Ldha;Tgfbr3;Kcnma1;Adora1;Sftpa1;Mmp9;Hmox1;Mmp14;Aldoc;Tek;Ramp2;Slc29a1;Fndc1;Sod2;Slc6a4;Ccl2;Ppargc1a;Epas1;Hp;Kdr
GO:1903524	positive regulation of blood circulation	11	78	0.0287638	0.308183	24392;155430;24366;24367;24807;25083;24886;311167;25589;24599;58812	Gja1;Hey2;Fgb;Fgg;Tacr1;Adra2a;Tbxas1;Smtnl1;Kdr;Nos2;Apln
GO:0031497	chromatin assembly	11	78	0.0287638	0.308183	291145;680097;294071;291159;680522;304648;140586;100360950;288242;100912290;288272	Hist1h1a;LOC680097;Hells;Hist1h2ail;Hist1h1b;Asf1b;Sox9;LOC100360950;Chaf1b;LOC100912290;Mis18a
GO:0030203	glycosaminoglycan metabolic process	10	68	0.0288465	0.308412	306251;25694;24649;367166;295934;84387;25589;293186;307859;24482	Itih1;Has2;Pim1;Hyal1;Chst1;Pglyrp1;Kdr;Lyve1;Chst5;Igf1
GO:0051346	negative regulation of hydrolase activity	31	303	0.0290097	0.309498	266775;24498;64041;24232;306283;307472;117092;24648;291091;25308;24795;311327;295703;113898;171112;296257;100911545;360228;116510;689388;29366;100360977;24482;117038;83928;306251;287526;288001;316521;288512;406161	Serpinb10;Il6;Birc5;C3;Anxa8;Sh3rf2;Serpinb7;Serpina1;Serpinb1a;Cstb;Serpina3n;Casc5;Serping1;Prdx5;Wfdc1;Cst7;LOC100911545;Wfdc21;Timp1;Ptx3;Serpine2;LOC100360977;Igf1;Mt3;Fetub;Itih1;Serpinf1;Kng1l1;Vil1;Elfn1;C4b
GO:0043062	extracellular structure organization	17	142	0.0292792	0.311053	302976;58966;25654;84032;687536;50654;24883;140586;113936;83781;64057;363265;304815;81682;29393;25694;81687	Noxo1;Ramp2;Col11a1;Col3a1;Foxf1;Ctss;Wt1;Sox9;Cpb2;Lgals3;Hapln2;Col4a3;Elf3;Lum;Col1a1;Has2;Mmp9
GO:0030198	extracellular matrix organization	17	142	0.0292792	0.311053	302976;58966;25654;84032;687536;50654;24883;140586;113936;83781;64057;363265;304815;81682;29393;25694;81687	Noxo1;Ramp2;Col11a1;Col3a1;Foxf1;Ctss;Wt1;Sox9;Cpb2;Lgals3;Hapln2;Col4a3;Elf3;Lum;Col1a1;Has2;Mmp9
GO:0055114	oxidation-reduction process	67	750	0.0298126	0.31253	690745;89813;290644;58835;24950;24953;246245;117254;83792;246074;84491;100359539;25375;365345;25427;29230;287610;114097;83504;24533;79129;81718;301518;117099;289185;24299;54246;362474;24848;113898;25256;24599;24451;307096;296621;287424;314438;170635;140910;170824;24787;64191;24886;295498;54349;24482;266684;79242;117038;24383;83516;50671;171142;296138;50549;25086;266807;259235;84493;81639;362720;1…	Marc1;Pdk4;Ifi30;Phgdh;Srd5a1;Gcgr;Fmo2;Prdx1;Scd;Scd1;Qsox1;LOC100359539;Aldh3a1;Cyb5r2;Cyp51;Sqle;Lpo;Ltc4s;Kl;Ldha;Cyba;Cdo1;Prkag3;Bdh1;Creg1;Cyp2a3;Cyp2f4;Adhfe1;Tph1;Prdx5;Fmo1;Nos2;Hmox1;Akr1c19;Phyhd1;Aloxe3;Degs2;Dhrs9;Msmo1;Steap3;Sod2;Dhcr7;Tbxas1;Adh6a;Aox1;Igf1;Cyp2d1;Hpgd;Mt3;Gapdh;Ppargc1a;Fasn;Lbp;Acoxl;Cyp4a1;Cyp2e1;Duox1;Sdr9c7;Fmo3;Alox15;Rrm2;LOC100363502;Cybb;Pycr1;Gpr116;Idh…
GO:0032490	detection of molecule of bacterial origin	3	8	0.0302312	0.31253	301227;406161;448830	Trem2;C4b;Ly96
GO:0060371	regulation of atrial cardiac muscle cell membrane depolarization	3	8	0.0302312	0.31253	29571;25349;24392	Scn10a;Scn2b;Gja1
GO:0071674	mononuclear cell migration	3	8	0.0302312	0.31253	24770;83781;84007	Ccl2;Lgals3;C3ar1
GO:0010193	response to ozone	3	8	0.0302312	0.31253	25086;24493;24807	Cyp2e1;Il1a;Tacr1
GO:0072110	glomerular mesangial cell proliferation	3	8	0.0302312	0.31253	24883;117092;84007	Wt1;Serpinb7;C3ar1
GO:0030007	cellular potassium ion homeostasis	3	8	0.0302312	0.31253	24212;24213;83731	Atp1a2;Atp1a3;Kcnma1
GO:2001044	regulation of integrin-mediated signaling pathway	3	8	0.0302312	0.31253	361303;116510;29186	Lims2;Timp1;Cd63
GO:0043369	CD4-positive or CD8-positive, alpha-beta T cell lineage commitment	3	8	0.0302312	0.31253	24498;291100;299206	Il6;Irf4;Batf
GO:0071281	cellular response to iron ion	3	8	0.0302312	0.31253	25203;24451;81687	Ccnb1;Hmox1;Mmp9
GO:0014050	negative regulation of glutamate secretion	3	8	0.0302312	0.31253	29290;25569;60582	Adora1;Trh;Il1rn
GO:0045907	positive regulation of vasoconstriction	6	31	0.030289	0.31253	24392;24366;24367;24807;24886;311167	Gja1;Fgb;Fgg;Tacr1;Tbxas1;Smtnl1
GO:0007098	centrosome cycle	6	31	0.030289	0.31253	171304;310344;114482;117524;497672;298884	Kif11;Plk4;Nek2;Ccnf;Brca1;Gen1
GO:0072577	endothelial cell apoptotic process	6	31	0.030289	0.31253	89804;58966;24366;24367;25589;363265	Tek;Ramp2;Fgb;Fgg;Kdr;Col4a3
GO:0002437	inflammatory response to antigenic stimulus	7	40	0.0306391	0.314207	64546;60582;289211;117029;25704;24614;24232	Il12b;Il1rn;Fcgr2b;Ccr5;Il2ra;Orm1;C3
GO:0051145	smooth muscle cell differentiation	7	40	0.0306391	0.314207	50672;155430;687536;58966;140586;54410;287129	Ednrb;Hey2;Foxf1;Ramp2;Sox9;Enpp3;Tmem204
GO:0009409	response to cold	7	40	0.0306391	0.314207	245920;83516;24498;316842;24787;79223;25569	Cxcl10;Ppargc1a;Il6;Metrnl;Sod2;Gk;Trh
GO:0046394	carboxylic acid biosynthetic process	25	234	0.0308716	0.315146	29592;170897;58835;497672;83792;246074;25017;59103;114097;89813;24962;58962;287424;311569;170635;140910;25557;54282;24886;50671;50549;29244;81639;680308;287877	Bcat1;Sphk1;Phgdh;Brca1;Scd;Scd1;Myo5a;Ptges;Ltc4s;Pdk4;Cth;Hpgds;Aloxe3;Acss2;Dhrs9;Msmo1;Star;Padi1;Tbxas1;Fasn;Cyp4a1;Gch1;Alox15;Mthfd2;Pycr1
GO:0016053	organic acid biosynthetic process	25	234	0.0308716	0.315146	29592;170897;58835;497672;83792;246074;25017;59103;114097;89813;24962;58962;287424;311569;170635;140910;25557;54282;24886;50671;50549;29244;81639;680308;287877	Bcat1;Sphk1;Phgdh;Brca1;Scd;Scd1;Myo5a;Ptges;Ltc4s;Pdk4;Cth;Hpgds;Aloxe3;Acss2;Dhrs9;Msmo1;Star;Padi1;Tbxas1;Fasn;Cyp4a1;Gch1;Alox15;Mthfd2;Pycr1
GO:0019886	antigen processing and presentation of exogenous peptide antigen via MHC class II	4	15	0.0311069	0.315146	688090;290644;361689;289211	RT1-Bb;Ifi30;Unc93b1;Fcgr2b
GO:0007263	nitric oxide mediated signal transduction	4	15	0.0311069	0.315146	366949;24599;689415;25728	Mafa;Nos2;Mt2A;Apoe
GO:0071372	cellular response to follicle-stimulating hormone stimulus	4	15	0.0311069	0.315146	25557;29200;29637;25154	Star;Inhba;Hmgcs1;Pgr
GO:0045662	negative regulation of myoblast differentiation	4	15	0.0311069	0.315146	245920;140586;360579;306748	Cxcl10;Sox9;Ccl9;Cxcl14
GO:0030728	ovulation	5	23	0.0320413	0.323308	304608;29200;84397;25154;79242	Mmp19;Inhba;Tnfaip6;Pgr;Hpgd
GO:0070741	response to interleukin-6	5	23	0.0320413	0.323308	24498;89824;24773;24795;24770	Il6;Chi3l1;Sftpa1;Serpina3n;Ccl2
GO:0071326	cellular response to monosaccharide stimulus	12	90	0.0323829	0.325448	84403;314386;79129;287526;63997;191575;25083;25557;64041;113936;25627;24310	Gjb6;Gpr68;Cyba;Serpinf1;Slc29a1;Nme1;Adra2a;Star;Birc5;Cpb2;Cma1;Ace
GO:0019722	calcium-mediated signaling	12	90	0.0323829	0.325448	317676;25054;170897;25334;498075;117029;116637;301227;81511;25542;25589;24482	Lat2;Ntrk2;Sphk1;Bhlha15;Trat1;Ccr5;Ccl4;Trem2;Lat;Ccl3;Kdr;Igf1
GO:0043067	regulation of programmed cell death	88	1025	0.0329009	0.329994	81819;89813;24498;24310;353250;304988;24962;83731;29290;89804;360243;58966;362510;25453;29200;24787;364018;25515;50672;83781;294071;81639;25589;25728;170897;25054;54237;64041;24571;60582;24770;81687;311426;170824;316521;24883;361514;691998;24367;360918;679787;289777;117038;65199;25542;81680;24890;25425;117232;313339;29427;24599;24451;680945;25308;24832;113959;289747;116510;117029;25557;296137;243…	Pax8;Pdk4;Il6;Ace;Niacr1;Mnda;Cth;Kcnma1;Adora1;Tek;Top2a;Ramp2;Melk;Gdnf;Inhba;Sod2;Ncf2;Plk1;Ednrb;Lgals3;Hells;Alox15;Kdr;Apoe;Sphk1;Ntrk2;Cdk1;Birc5;Muc1;Il1rn;Ccl2;Mmp9;Siglec1;Steap3;Vil1;Wt1;Meis3;Nlrp1b;Fgg;Pf4;Clec5a;Fignl1;Mt3;Kcnip3;Ccl3;Lifr;Esr1;Ctsh;Barhl1;Acer2;Aif1;Nos2;Hmox1;Sdf2l1;Cstb;Thy1;C5ar1;Osm;Timp1;Ccr5;Star;Bub1;Fgb;Sox9;Bid;Ubd;Bard1;Pgr;Ddias;Brca1;Plaur;Frzb;C6;Ldha;…
GO:0008219	cell death	113	1352	0.0330235	0.330564	81819;89813;24498;113901;24493;24310;286894;353250;286896;304988;24962;83731;29290;24191;89804;360243;58966;65161;362510;25453;29200;24787;364018;25515;24383;50672;83781;294071;81639;24464;25589;25524;25728;25059;25054;54237;64041;24571;60582;24770;25425;89824;311426;170824;114105;64625;24392;24883;361514;691998;24367;287526;50692;679787;171576;289777;25704;117038;65199;25542;81680;360161;24890;8…	Pax8;Pdk4;Il6;Chia;Il1a;Ace;Parm1;Niacr1;Sgpl1;Mnda;Cth;Kcnma1;Adora1;Aldoc;Tek;Top2a;Ramp2;Litaf;Melk;Gdnf;Inhba;Sod2;Ncf2;Plk1;Gapdh;Ednrb;Lgals3;Hells;Alox15;Hp;Kdr;Psap;Apoe;Hk2;Ntrk2;Cdk1;Birc5;Muc1;Il1rn;Ccl2;Ctsh;Chi3l1;Siglec1;Steap3;Cxcl2;Bid;Gja1;Wt1;Meis3;Nlrp1b;Fgg;Serpinf1;Plaur;Clec5a;Bub1b;Fignl1;Il2ra;Mt3;Kcnip3;Ccl3;Lifr;Nek6;Esr1;Mmp9;Barhl1;Sphk1;Acer2;Aif1;Nos2;Hmox1;Sdf2l1;Gj…
GO:1901699	cellular response to nitrogen compound	35	355	0.0331123	0.330794	29597;85497;89813;114203;24950;24953;117038;497672;170913;25017;291675;60582;83504;84032;79129;24795;81869;24614;81743;29427;24773;29393;50592;24883;25557;301227;25383;25553;24770;29221;83516;140586;114090;498840;499870	P2ry2;Klf15;Pdk4;Sh2b2;Srd5a1;Gcgr;Mt3;Brca1;Abcb1a;Myo5a;Mzb1;Il1rn;Kl;Col3a1;Cyba;Serpina3n;Gstm7;Orm1;Pde2a;Aif1;Sftpa1;Col1a1;Gria1;Wt1;Star;Trem2;Apobec1;Slc6a4;Ccl2;Arg1;Ppargc1a;Sox9;Egr2;Tmem173;Rad51
GO:0008203	cholesterol metabolic process	11	80	0.0331847	0.33086	81726;25330;25728;89784;117038;25557;29637;83791;64191;25427;29230	Mvd;Lipe;Apoe;Idi1;Mt3;Star;Hmgcs1;Fdps;Dhcr7;Cyp51;Sqle
GO:0010634	positive regulation of epithelial cell migration	9	60	0.0335608	0.333287	89804;24807;117029;367166;140586;25589;316521;25425;81687	Tek;Tacr1;Ccr5;Hyal1;Sox9;Kdr;Vil1;Ctsh;Mmp9
GO:0033559	unsaturated fatty acid metabolic process	9	60	0.0335608	0.333287	58962;287424;79242;170897;50549;114097;81639;24886;59103	Hpgds;Aloxe3;Hpgd;Sphk1;Cyp4a1;Ltc4s;Alox15;Tbxas1;Ptges
GO:0006334	nucleosome assembly	10	70	0.0336367	0.333381	291145;680097;288272;291159;680522;304648;140586;100360950;288242;100912290	Hist1h1a;LOC680097;Mis18a;Hist1h2ail;Hist1h1b;Asf1b;Sox9;LOC100360950;Chaf1b;LOC100912290
GO:1901880	negative regulation of protein depolymerization	7	41	0.0339329	0.334945	24171;84510;306575;296654;297339;25203;316521	Add2;Stmn2;Ckap2;Gsn;Capg;Ccnb1;Vil1
GO:0019233	sensory perception of pain	14	112	0.0339664	0.334945	64546;29597;287424;60582;50672;29571;24807;24476;65199;25542;29290;24493;50654;24310	Il12b;P2ry2;Aloxe3;Il1rn;Ednrb;Scn10a;Tacr1;Iapp;Kcnip3;Ccl3;Adora1;Il1a;Ctss;Ace
GO:0006040	amino sugar metabolic process	6	32	0.0340611	0.334945	683570;302972;89824;304860;113901;307859	Gnpda1;Amdhd2;Chi3l1;Npl;Chia;Chst5
GO:0008209	androgen metabolic process	6	32	0.0340611	0.334945	83516;286896;170635;24950;25557;24890	Ppargc1a;Sgpl1;Dhrs9;Srd5a1;Star;Esr1
GO:0055076	transition metal ion homeostasis	12	91	0.0345716	0.339301	306009;117038;29292;100360087;29452;170824;24787;689415;100362384;170496;24451;113910	Slc39a14;Mt3;Ftl1;LOC100360087;Epas1;Steap3;Sod2;Mt2A;LOC100362384;Lcn2;Hmox1;Prnd
GO:0012501	programmed cell death	106	1264	0.0352117	0.34491	81819;89813;24498;113901;24493;24310;286894;353250;286896;304988;24962;83731;29290;24191;89804;360243;58966;65161;362510;25453;29200;24787;364018;25515;24383;50672;83781;294071;81639;25589;25728;25059;25054;54237;64041;24571;60582;24770;81687;89824;311426;170824;316521;24392;24883;361514;691998;24367;50692;679787;171576;289777;25704;117038;65199;25542;81680;360161;24890;25425;117232;170897;313339…	Pax8;Pdk4;Il6;Chia;Il1a;Ace;Parm1;Niacr1;Sgpl1;Mnda;Cth;Kcnma1;Adora1;Aldoc;Tek;Top2a;Ramp2;Litaf;Melk;Gdnf;Inhba;Sod2;Ncf2;Plk1;Gapdh;Ednrb;Lgals3;Hells;Alox15;Kdr;Apoe;Hk2;Ntrk2;Cdk1;Birc5;Muc1;Il1rn;Ccl2;Mmp9;Chi3l1;Siglec1;Steap3;Vil1;Gja1;Wt1;Meis3;Nlrp1b;Fgg;Plaur;Clec5a;Bub1b;Fignl1;Il2ra;Mt3;Kcnip3;Ccl3;Lifr;Nek6;Esr1;Ctsh;Barhl1;Sphk1;Acer2;Aif1;Nos2;Hmox1;Sdf2l1;Gjb6;Cstb;Thy1;C5ar1;Osm…
GO:0031348	negative regulation of defense response	13	102	0.0354697	0.346761	64546;100911545;25728;289211;287526;290326;687536;25732;316842;25704;295703;84387;29290	Il12b;LOC100911545;Apoe;Fcgr2b;Serpinf1;Pbk;Foxf1;Acp5;Metrnl;Il2ra;Serping1;Pglyrp1;Adora1
GO:0051251	positive regulation of lymphocyte activation	18	157	0.035576	0.347125	64546;24498;353218;64545;56822;499342;24807;24832;25704;361226;679975;362076;24770;29427;688090;24482;25572;309304	Il12b;Il6;Tnfsf9;Icos;Cd86;Cd274;Tacr1;Thy1;Il2ra;Cd83;Gpr183;Il36b;Ccl2;Aif1;RT1-Bb;Igf1;Tnfrsf4;Pdcd1lg2
GO:0016265	death	113	1357	0.0357281	0.347487	81819;89813;24498;113901;24493;24310;286894;353250;286896;304988;24962;83731;29290;24191;89804;360243;58966;65161;362510;25453;29200;24787;364018;25515;24383;50672;83781;294071;81639;24464;25589;25524;25728;25059;25054;54237;64041;24571;60582;24770;25425;89824;311426;170824;114105;64625;24392;24883;361514;691998;24367;287526;50692;679787;171576;289777;25704;117038;65199;25542;81680;360161;24890;8…	Pax8;Pdk4;Il6;Chia;Il1a;Ace;Parm1;Niacr1;Sgpl1;Mnda;Cth;Kcnma1;Adora1;Aldoc;Tek;Top2a;Ramp2;Litaf;Melk;Gdnf;Inhba;Sod2;Ncf2;Plk1;Gapdh;Ednrb;Lgals3;Hells;Alox15;Hp;Kdr;Psap;Apoe;Hk2;Ntrk2;Cdk1;Birc5;Muc1;Il1rn;Ccl2;Ctsh;Chi3l1;Siglec1;Steap3;Cxcl2;Bid;Gja1;Wt1;Meis3;Nlrp1b;Fgg;Serpinf1;Plaur;Clec5a;Bub1b;Fignl1;Il2ra;Mt3;Kcnip3;Ccl3;Lifr;Nek6;Esr1;Mmp9;Barhl1;Sphk1;Acer2;Aif1;Nos2;Hmox1;Sdf2l1;Gj…
GO:0043500	muscle adaptation	8	51	0.0357514	0.347487	85497;155430;79129;140939;83791;29427;29437;24482	Klf15;Hey2;Cyba;Trim63;Fdps;Aif1;Acta1;Igf1
GO:2000021	regulation of ion homeostasis	17	146	0.0359438	0.348011	245920;305236;24807;24392;301086;289596;29571;79129;24832;117029;81869;25349;306811;25316;25542;29290;50672	Cxcl10;Cxcl11;Tacr1;Gja1;Xcr1;Corin;Scn10a;Cyba;Thy1;Ccr5;Gstm7;Scn2b;Wnk2;Ms4a2;Ccl3;Adora1;Ednrb
GO:0002573	myeloid leukocyte differentiation	17	146	0.0359438	0.348011	64546;361537;353218;362634;366126;56822;314386;304334;287818;291100;25732;191575;360918;81743;25542;29168;299206	Il12b;Tyrobp;Tnfsf9;C1qc;Spi1;Cd86;Gpr68;Fam20c;Cd300lf;Irf4;Acp5;Nme1;Pf4;Pde2a;Ccl3;Ubd;Batf
GO:0030168	platelet activation	10	71	0.0362288	0.350095	25728;406864;24366;24367;25651;25083;29366;360918;310392;84492	Apoe;Clic1;Fgb;Fgg;Selp;Adra2a;Serpine2;Pf4;Slc7a11;Tec
GO:0046006	regulation of activated T cell proliferation	5	24	0.036716	0.352264	64546;353218;24482;56822;25704	Il12b;Tnfsf9;Igf1;Cd86;Il2ra
GO:0002886	regulation of myeloid leukocyte mediated immunity	5	24	0.036716	0.352264	24232;687536;25316;24451;60665	C3;Foxf1;Ms4a2;Hmox1;Cxcl6
GO:0090181	regulation of cholesterol metabolic process	4	16	0.0369439	0.352264	83791;64191;25427;25728	Fdps;Dhcr7;Cyp51;Apoe
GO:0090307	spindle assembly involved in mitosis	4	16	0.0369439	0.352264	315298;296344;114482;171304	Racgap1;Mybl2;Nek2;Kif11
GO:0045956	positive regulation of calcium ion-dependent exocytosis	4	16	0.0369439	0.352264	59267;81820;65171;26989	Syt7;Doc2b;Scamp5;Cadps
GO:0051693	actin filament capping	4	16	0.0369439	0.352264	316521;297339;24171;296654	Vil1;Capg;Add2;Gsn
GO:0010996	response to auditory stimulus	4	16	0.0369439	0.352264	24498;245920;25054;24807	Il6;Cxcl10;Ntrk2;Tacr1
GO:0051591	response to cAMP	14	114	0.038084	0.360058	89804;24533;266807;24950;24795;24883;25557;81718;191575;114090;192262;25375;304608;29393	Tek;Ldha;Duox1;Srd5a1;Serpina3n;Wt1;Star;Cdo1;Nme1;Egr2;C1s;Aldh3a1;Mmp19;Col1a1
GO:0034311	diol metabolic process	3	9	0.0384061	0.360058	313339;170897;314438	Acer2;Sphk1;Degs2
GO:0034501	protein localization to kinetochore	3	9	0.0384061	0.360058	171576;54237;311327	Bub1b;Cdk1;Casc5
GO:0042759	long-chain fatty acid biosynthetic process	3	9	0.0384061	0.360058	81639;287424;25017	Alox15;Aloxe3;Myo5a
GO:0035589	G-protein coupled purinergic nucleotide receptor signaling pathway	3	9	0.0384061	0.360058	29597;117264;63843	P2ry2;P2ry6;P2ry4
GO:0031650	regulation of heat generation	3	9	0.0384061	0.360058	50672;117029;58812	Ednrb;Ccr5;Apln
GO:2001214	positive regulation of vasculogenesis	3	9	0.0384061	0.360058	25589;497979;58966	Kdr;Tmem100;Ramp2
GO:0001878	response to yeast	3	9	0.0384061	0.360058	24498;689388;56822	Il6;Ptx3;Cd86
GO:0043619	regulation of transcription from RNA polymerase II promoter in response to oxidative stress	3	9	0.0384061	0.360058	117038;24451;29452	Mt3;Hmox1;Epas1
GO:0014812	muscle cell migration	8	52	0.0389962	0.364908	29597;83516;25154;24807;117264;29427;24482;24310	P2ry2;Ppargc1a;Pgr;Tacr1;P2ry6;Aif1;Igf1;Ace
GO:0072330	monocarboxylic acid biosynthetic process	17	148	0.0396627	0.370456	58962;287424;170897;50671;89813;311569;170635;114097;140910;81639;25557;497672;24886;83792;246074;25017;59103	Hpgds;Aloxe3;Sphk1;Fasn;Pdk4;Acss2;Dhrs9;Ltc4s;Msmo1;Alox15;Star;Brca1;Tbxas1;Scd;Scd1;Myo5a;Ptges
GO:0006813	potassium ion transport	19	171	0.0402449	0.374868	684516;259243;170899;81503;100909725;116649;24212;50599;116745;24213;116695;65199;64120;84396;83731;29290;29639;365391;317170	Kcnc4;Kcnip4;Kcnk2;Cxcl1;LOC100909725;Kcnj4;Atp1a2;Kcnj3;Kcnh6;Atp1a3;Kcnd1;Kcnip3;Kcnk13;Atp1b4;Kcnma1;Adora1;Fxyd2;Trpm5;Slc9a7
GO:0030879	mammary gland development	15	126	0.0402844	0.374868	687536;25154;25059;63997;170913;81718;191575;24848;140586;304815;29221;24890;24482;295691;310621	Foxf1;Pgr;Hk2;Slc29a1;Abcb1a;Cdo1;Nme1;Tph1;Sox9;Elf3;Arg1;Esr1;Igf1;Frzb;Iqgap3
GO:0032941	secretion by tissue	11	83	0.0406842	0.376796	29597;25339;25059;63997;79129;24807;191575;81718;83731;170913;29290	P2ry2;Npr3;Hk2;Slc29a1;Cyba;Tacr1;Nme1;Cdo1;Kcnma1;Abcb1a;Adora1
GO:0006665	sphingolipid metabolic process	11	83	0.0406842	0.376796	287424;170897;286896;362800;362619;313339;25524;314438;294422;314360;282838	Aloxe3;Sphk1;Sgpl1;Itgb8;Smpdl3b;Acer2;Psap;Degs2;Smpdl3a;Galc;Gm2a
GO:0051241	negative regulation of multicellular organismal process	31	313	0.0407164	0.376796	29597;25350;25728;24498;84387;25542;81819;295691;24392;289211;311167;79129;24476;295703;63865;83731;29290;24451;64546;24848;25732;361226;113936;25553;29366;24212;691992;290757;25083;140586;58812	P2ry2;Sftpd;Apoe;Il6;Pglyrp1;Ccl3;Pax8;Frzb;Gja1;Fcgr2b;Smtnl1;Cyba;Iapp;Serping1;Lgmn;Kcnma1;Adora1;Hmox1;Il12b;Tph1;Acp5;Cd83;Cpb2;Slc6a4;Serpine2;Atp1a2;Gp1ba;F11;Adra2a;Sox9;Apln
GO:0001676	long-chain fatty acid metabolic process	7	43	0.0412056	0.378395	25330;287424;170897;50549;81639;25017;113976	Lipe;Aloxe3;Sphk1;Cyp4a1;Alox15;Myo5a;Acsl4
GO:0002275	myeloid cell activation involved in immune response	7	43	0.0412056	0.378395	361537;317676;687536;25316;81511;25542;24451	Tyrobp;Lat2;Foxf1;Ms4a2;Lat;Ccl3;Hmox1
GO:0032103	positive regulation of response to external stimulus	17	149	0.0416229	0.378395	498335;245920;84007;448830;305355;287561;117029;24770;24498;116637;81743;25542;25589;29427;24232;50654;24310	Cxcl13;Cxcl10;C3ar1;Ly96;Tlr10;Ccl7;Ccr5;Ccl2;Il6;Ccl4;Pde2a;Ccl3;Kdr;Aif1;C3;Ctss;Ace
GO:0006692	prostanoid metabolic process	5	25	0.0417875	0.378395	58962;79242;59103;170897;24886	Hpgds;Hpgd;Ptges;Sphk1;Tbxas1
GO:0007620	copulation	5	25	0.0417875	0.378395	29597;24807;50672;25553;29366	P2ry2;Tacr1;Ednrb;Slc6a4;Serpine2
GO:0033189	response to vitamin A	5	25	0.0417875	0.378395	114097;29221;24773;25653;81687	Ltc4s;Arg1;Sftpa1;Tshb;Mmp9
GO:0006693	prostaglandin metabolic process	5	25	0.0417875	0.378395	58962;79242;59103;170897;24886	Hpgds;Hpgd;Ptges;Sphk1;Tbxas1
GO:0014911	positive regulation of smooth muscle cell migration	5	25	0.0417875	0.378395	29597;29427;117264;25154;24482	P2ry2;Aif1;P2ry6;Pgr;Igf1
GO:0045652	regulation of megakaryocyte differentiation	5	25	0.0417875	0.378395	501854;680097;100912290;100360950;360918	Rab7b;LOC680097;LOC100912290;LOC100360950;Pf4
GO:0050802	circadian sleep/wake cycle, sleep	5	25	0.0417875	0.378395	24498;25557;24950;84387;29290	Il6;Star;Srd5a1;Pglyrp1;Adora1
GO:0046849	bone remodeling	10	73	0.0418213	0.378395	24498;24392;89813;24848;25732;24476;282836;29175;50654;64576	Il6;Gja1;Pdk4;Tph1;Acp5;Iapp;Cthrc1;Ctsk;Ctss;Ptprv
GO:0030336	negative regulation of cell migration	16	138	0.0421244	0.378395	498335;60582;25728;116680;287526;84032;24832;83516;117029;24770;685692;29610;29186;116510;29290;29427	Cxcl13;Il1rn;Apoe;Ptpru;Serpinf1;Col3a1;Thy1;Ppargc1a;Ccr5;Ccl2;Gcsam;Tgfbr3;Cd63;Timp1;Adora1;Aif1
GO:0002768	immune response-regulating cell surface receptor signaling pathway	13	105	0.0423465	0.378395	114203;317676;84007;293783;113959;498075;24832;25046;685692;304988;25316;84492;83781	Sh2b2;Lat2;C3ar1;Lpxn;C5ar1;Trat1;Thy1;Pigr;Gcsam;Mnda;Ms4a2;Tec;Lgals3
GO:0042246	tissue regeneration	8	53	0.0424316	0.378395	170568;24392;310448;50692;296654;25203;84492;24482	Dmbt1;Gja1;Igsf10;Plaur;Gsn;Ccnb1;Tec;Igf1
GO:0006096	glycolytic process	8	53	0.0424316	0.378395	24191;25060;24383;83516;25059;24533;24333;24482	Aldoc;Hk3;Gapdh;Ppargc1a;Hk2;Ldha;Eno1;Igf1
GO:0010965	regulation of mitotic sister chromatid separation	6	34	0.0424815	0.378395	83620;171576;360621;298884;360161;25515	Cit;Bub1b;Cdc6;Gen1;Nek6;Plk1
GO:0033047	regulation of mitotic sister chromatid segregation	6	34	0.0424815	0.378395	83620;171576;360621;298884;360161;25515	Cit;Bub1b;Cdc6;Gen1;Nek6;Plk1
GO:0032653	regulation of interleukin-10 production	6	34	0.0424815	0.378395	64546;499342;500590;289211;291100;361226	Il12b;Cd274;Tnfrsf9;Fcgr2b;Irf4;Cd83
GO:0001659	temperature homeostasis	6	34	0.0424815	0.378395	60582;50672;117029;58812;29290;24493	Il1rn;Ednrb;Ccr5;Apln;Adora1;Il1a
GO:0033045	regulation of sister chromatid segregation	6	34	0.0424815	0.378395	83620;171576;360621;298884;360161;25515	Cit;Bub1b;Cdc6;Gen1;Nek6;Plk1
GO:0006694	steroid biosynthetic process	14	116	0.0425459	0.378395	81726;25728;116510;89784;24950;25557;140910;29637;83791;64191;24482;24493;365345;25427	Mvd;Apoe;Timp1;Idi1;Srd5a1;Star;Msmo1;Hmgcs1;Fdps;Dhcr7;Igf1;Il1a;Cyb5r2;Cyp51
GO:0071241	cellular response to inorganic substance	14	116	0.0425459	0.378395	117038;25203;83516;56822;287526;288589;81639;25557;296654;689415;24773;24599;24451;81687	Mt3;Ccnb1;Ppargc1a;Cd86;Serpinf1;Rasa4;Alox15;Star;Gsn;Mt2A;Sftpa1;Nos2;Hmox1;Mmp9
GO:0006887	exocytosis	23	219	0.0429876	0.380971	317676;299339;25316;59267;25542;60566;25017;291597;26989;81820;85266;24451;365377;687536;170824;24953;302538;287562;24366;24367;25083;65171;81511	Lat2;Tnfaip2;Ms4a2;Syt7;Ccl3;Syt8;Myo5a;Trim36;Cadps;Doc2b;Prss12;Hmox1;Trim72;Foxf1;Steap3;Gcgr;Sytl5;Ccl12;Fgb;Fgg;Adra2a;Scamp5;Lat
GO:0010941	regulation of cell death	93	1106	0.0433411	0.380971	81819;89813;24498;24310;353250;304988;24962;83731;29290;89804;360243;58966;362510;25453;29200;24787;364018;25515;50672;83781;294071;81639;24464;25589;25524;25728;170897;25054;54237;64041;24571;60582;24770;81687;311426;170824;316521;24883;361514;691998;24367;287526;50692;679787;289777;117038;65199;25542;81680;24890;25425;117232;313339;29427;24599;24451;680945;25308;24832;113959;289747;116510;11702…	Pax8;Pdk4;Il6;Ace;Niacr1;Mnda;Cth;Kcnma1;Adora1;Tek;Top2a;Ramp2;Melk;Gdnf;Inhba;Sod2;Ncf2;Plk1;Ednrb;Lgals3;Hells;Alox15;Hp;Kdr;Psap;Apoe;Sphk1;Ntrk2;Cdk1;Birc5;Muc1;Il1rn;Ccl2;Mmp9;Siglec1;Steap3;Vil1;Wt1;Meis3;Nlrp1b;Fgg;Serpinf1;Plaur;Clec5a;Fignl1;Mt3;Kcnip3;Ccl3;Lifr;Esr1;Ctsh;Barhl1;Acer2;Aif1;Nos2;Hmox1;Sdf2l1;Cstb;Thy1;C5ar1;Osm;Timp1;Ccr5;Star;Bub1;Fgb;Sox9;Bid;Ubd;Bard1;Pgr;Ddias;Brca1;…
GO:0007567	parturition	4	17	0.0433662	0.380971	24770;24834;79242;81687	Ccl2;Tk1;Hpgd;Mmp9
GO:0045653	negative regulation of megakaryocyte differentiation	4	17	0.0433662	0.380971	100360950;680097;100912290;360918	LOC100360950;LOC680097;LOC100912290;Pf4
GO:0035590	purinergic nucleotide receptor signaling pathway	4	17	0.0433662	0.380971	29597;117264;353250;63843	P2ry2;P2ry6;Niacr1;P2ry4
GO:0010575	positive regulation vascular endothelial growth factor production	4	17	0.0433662	0.380971	24232;24493;497672;84007	C3;Il1a;Brca1;C3ar1
GO:0060343	trabecula formation	4	17	0.0433662	0.380971	89804;29610;155430;29393	Tek;Tgfbr3;Hey2;Col1a1
GO:0010959	regulation of metal ion transport	25	243	0.0435758	0.38171	315611;29186;24832;25316;116637;25542;25017;24310;245920;24392;29465;81503;117258;79129;81869;306811;29290;29639;83567;305236;25349;29366;24770;24482;83781	Scn4b;Cd63;Thy1;Ms4a2;Ccl4;Ccl3;Myo5a;Ace;Cxcl10;Gja1;Trpv2;Cxcl1;Cntn1;Cyba;Gstm7;Wnk2;Adora1;Fxyd2;Mchr1;Cxcl11;Scn2b;Serpine2;Ccl2;Igf1;Lgals3
GO:0052548	regulation of endopeptidase activity	30	303	0.0436023	0.38171	266775;24498;64041;316521;24232;25425;306283;100911545;117092;24648;291091;24795;313339;295703;363265;113898;171112;296257;25308;116510;29366;24482;117038;83928;306251;287526;288001;100363502;64625;406161	Serpinb10;Il6;Birc5;Vil1;C3;Ctsh;Anxa8;LOC100911545;Serpinb7;Serpina1;Serpinb1a;Serpina3n;Acer2;Serping1;Col4a3;Prdx5;Wfdc1;Cst7;Cstb;Timp1;Serpine2;Igf1;Mt3;Fetub;Itih1;Serpinf1;Kng1l1;LOC100363502;Bid;C4b
GO:0002366	leukocyte activation involved in immune response	16	139	0.0442591	0.386115	64546;361537;317676;291100;56822;306071;83781;687536;25316;24498;679975;84387;25542;24451;299206;81511	Il12b;Tyrobp;Lat2;Irf4;Cd86;Lcp1;Lgals3;Foxf1;Ms4a2;Il6;Gpr183;Pglyrp1;Ccl3;Hmox1;Batf;Lat
GO:0002263	cell activation involved in immune response	16	139	0.0442591	0.386115	64546;361537;317676;291100;56822;306071;83781;687536;25316;24498;679975;84387;25542;24451;299206;81511	Il12b;Tyrobp;Lat2;Irf4;Cd86;Lcp1;Lgals3;Foxf1;Ms4a2;Il6;Gpr183;Pglyrp1;Ccl3;Hmox1;Batf;Lat
GO:0001889	liver development	14	117	0.0449098	0.391112	24787;314818;24834;24950;117099;24464;140586;113936;29637;308100;29221;361303;295691;29610	Sod2;E2f7;Tk1;Srd5a1;Bdh1;Hp;Sox9;Cpb2;Hmgcs1;Acat2;Arg1;Lims2;Frzb;Tgfbr3
GO:0051817	modification of morphology or physiology of other organism involved in symbiotic interaction	7	44	0.0451932	0.391552	60665;117029;689388;116637;25542;301229;81687	Cxcl6;Ccr5;Ptx3;Ccl4;Ccl3;Trem1;Mmp9
GO:0043242	negative regulation of protein complex disassembly	7	44	0.0451932	0.391552	24171;84510;306575;296654;297339;25203;316521	Add2;Stmn2;Ckap2;Gsn;Capg;Ccnb1;Vil1
GO:0051249	regulation of lymphocyte activation	25	244	0.045194	0.391552	362076;499342;25350;24832;25704;24498;679975;84387;688090;291675;353218;289211;304988;29427;64546;64545;56822;24807;361226;81511;24770;24482;25572;83781;309304	Il36b;Cd274;Sftpd;Thy1;Il2ra;Il6;Gpr183;Pglyrp1;RT1-Bb;Mzb1;Tnfsf9;Fcgr2b;Mnda;Aif1;Il12b;Icos;Cd86;Tacr1;Cd83;Lat;Ccl2;Igf1;Tnfrsf4;Lgals3;Pdcd1lg2
GO:0002250	adaptive immune response	21	197	0.0455078	0.393592	64546;81639;362634;84007;289211;298566;29687;291100;24988;25425;50654;24498;192262;295703;299206;79126;24232;688090;117512;406161;24237	Il12b;Alox15;C1qc;C3ar1;Fcgr2b;C1qa;C1qb;Irf4;RT1-M2;Ctsh;Ctss;Il6;C1s;Serping1;Batf;Cfi;C3;RT1-Bb;C9;C4b;C6
GO:0044772	mitotic cell cycle phase transition	24	233	0.04669	0.396507	171576;304477;54237;64041;25203;170913;308768;360161;24571;310621;29427;684771;360243;315852;363227;314818;29200;114494;25515;83620;360621;296137;24649;64625	Bub1b;Kntc1;Cdk1;Birc5;Ccnb1;Abcb1a;Ticrr;Nek6;Muc1;Iqgap3;Aif1;Cdca5;Top2a;Ttk;Nabp1;E2f7;Inhba;Ccna2;Plk1;Cit;Cdc6;Bub1;Pim1;Bid
GO:0050867	positive regulation of cell activation	20	186	0.0467433	0.396507	64546;24498;353218;64545;24807;56822;499342;24832;25651;25316;25704;361226;679975;362076;24770;29427;688090;24482;25572;309304	Il12b;Il6;Tnfsf9;Icos;Tacr1;Cd86;Cd274;Thy1;Selp;Ms4a2;Il2ra;Cd83;Gpr183;Il36b;Ccl2;Aif1;RT1-Bb;Igf1;Tnfrsf4;Pdcd1lg2
GO:1903522	regulation of blood circulation	20	186	0.0467433	0.396507	29597;25349;24392;155430;24366;29571;83731;24807;29452;25083;24212;315611;25364;24886;24367;25589;29290;311167;24599;58812	P2ry2;Scn2b;Gja1;Hey2;Fgb;Scn10a;Kcnma1;Tacr1;Epas1;Adra2a;Atp1a2;Scn4b;Asic2;Tbxas1;Fgg;Kdr;Adora1;Smtnl1;Nos2;Apln
GO:2000378	negative regulation of reactive oxygen species metabolic process	5	26	0.0472604	0.396507	117038;24464;497672;25732;100363502	Mt3;Hp;Brca1;Acp5;LOC100363502
GO:0022410	circadian sleep/wake cycle process	5	26	0.0472604	0.396507	24498;25557;24950;84387;29290	Il6;Star;Srd5a1;Pglyrp1;Adora1
GO:0008299	isoprenoid biosynthetic process	5	26	0.0472604	0.396507	170635;81726;29637;89784;83791	Dhrs9;Mvd;Hmgcs1;Idi1;Fdps
GO:0043524	negative regulation of neuron apoptotic process	14	118	0.0473642	0.396507	117038;117232;25728;113959;25054;25453;25557;64041;24787;63865;24770;25589;83516;24451	Mt3;Barhl1;Apoe;C5ar1;Ntrk2;Gdnf;Star;Birc5;Sod2;Lgmn;Ccl2;Kdr;Ppargc1a;Hmox1
GO:0061008	hepaticobiliary system development	14	118	0.0473642	0.396507	24787;314818;24834;24950;117099;24464;140586;113936;29637;308100;29221;361303;295691;29610	Sod2;E2f7;Tk1;Srd5a1;Bdh1;Hp;Sox9;Cpb2;Hmgcs1;Acat2;Arg1;Lims2;Frzb;Tgfbr3
GO:1990267	response to transition metal nanoparticle	14	118	0.0473642	0.396507	24464;25732;24834;54237;25203;24648;24787;25383;689415;29221;24493;691657;24451;81687	Hp;Acp5;Tk1;Cdk1;Ccnb1;Serpina1;Sod2;Apobec1;Mt2A;Arg1;Il1a;Crip1;Hmox1;Mmp9
GO:2001053	regulation of mesenchymal cell apoptotic process	3	10	0.0475808	0.396507	24883;140586;81819	Wt1;Sox9;Pax8
GO:0002360	T cell lineage commitment	3	10	0.0475808	0.396507	24498;291100;299206	Il6;Irf4;Batf
GO:0003093	regulation of glomerular filtration	3	10	0.0475808	0.396507	29290;79129;24392	Adora1;Cyba;Gja1
GO:0036120	cellular response to platelet-derived growth factor stimulus	3	10	0.0475808	0.396507	367166;25694;24770	Hyal1;Has2;Ccl2
GO:0097067	cellular response to thyroid hormone stimulus	3	10	0.0475808	0.396507	83516;50654;25425	Ppargc1a;Ctss;Ctsh
GO:0021534	cell proliferation in hindbrain	3	10	0.0475808	0.396507	113959;24482;25553	C5ar1;Igf1;Slc6a4
GO:0060056	mammary gland involution	3	10	0.0475808	0.396507	29221;295691;304815	Arg1;Frzb;Elf3
GO:0055094	response to lipoprotein particle	3	10	0.0475808	0.396507	24770;29637;81687	Ccl2;Hmgcs1;Mmp9
GO:1901032	negative regulation of response to reactive oxygen species	3	10	0.0475808	0.396507	24464;25524;287877	Hp;Psap;Pycr1
GO:0009642	response to light intensity	3	10	0.0475808	0.396507	29637;365901;81687	Hmgcs1;Gnat2;Mmp9
GO:0043117	positive regulation of vascular permeability	3	10	0.0475808	0.396507	116637;24807;81743	Ccl4;Tacr1;Pde2a
GO:0097152	mesenchymal cell apoptotic process	3	10	0.0475808	0.396507	24883;140586;81819	Wt1;Sox9;Pax8
GO:2001054	negative regulation of mesenchymal cell apoptotic process	3	10	0.0475808	0.396507	24883;140586;81819	Wt1;Sox9;Pax8
GO:0009743	response to carbohydrate	22	210	0.0478627	0.398195	84403;64041;25569;24493;364018;24310;24392;24533;79129;363265;314386;25732;191575;25557;24787;287526;63997;25083;24464;113936;366949;25627	Gjb6;Birc5;Trh;Il1a;Ncf2;Ace;Gja1;Ldha;Cyba;Col4a3;Gpr68;Acp5;Nme1;Star;Sod2;Serpinf1;Slc29a1;Adra2a;Hp;Cpb2;Mafa;Cma1
GO:0065003	macromolecular complex assembly	87	1034	0.0484996	0.402292	689399;29213;315215;100912290;24392;246118;315298;296368;29610;24962;83731;24191;89804;294071;24787;289054;100360950;113910;294286;81639;25728;24834;500590;54237;304648;365377;25448;25203;291675;296344;50665;680522;79129;140586;24778;24904;84510;680097;294269;29221;316521;24366;24367;291081;360918;362720;65178;298850;500377;292060;291159;81687;26989;54227;29427;288242;24451;29393;291145;25651;116…	Cenpw;Tubb4a;Mlc1;LOC100912290;Gja1;Tubb3;Racgap1;Ube2c;Tgfbr3;Cth;Kcnma1;Aldoc;Tek;Hells;Sod2;Aspm;LOC100360950;Prnd;Kifc1;Alox15;Apoe;Tk1;Tnfrsf9;Cdk1;Asf1b;Trim72;Cenpi;Ccnb1;Mzb1;Mybl2;Tmsb10;Hist1h1b;Cyba;Sox9;Slc2a1;Slc22a1;Stmn2;LOC680097;RT1-Da;Arg1;Vil1;Fgb;Fgg;Tubb2b;Pf4;Rrm2;Snap91;Cenpa;Tuba8;Irf8;Hist1h2ail;Mmp9;Cadps;Arpc1b;Aif1;Chaf1b;Hmox1;Col1a1;Hist1h1a;Selp;Kcnh6;Slc6a4;Tuba1c;…
GO:0001775	cell activation	52	581	0.0485184	0.402292	362076;499342;317676;25350;25728;406864;297666;24832;25316;25704;24498;364754;64545;84387;25542;688090;25033;291675;306071;353218;289211;304988;299206;116510;29427;84492;24451;64546;291100;56822;24807;687536;25651;54264;361226;360918;81511;29366;24770;310392;24482;25572;361537;366126;679975;24366;24367;83781;25083;689415;29168;309304	Il36b;Cd274;Lat2;Sftpd;Apoe;Clic1;Klra5;Thy1;Ms4a2;Il2ra;Il6;Fzd8;Icos;Pglyrp1;Ccl3;RT1-Bb;Sstr1;Mzb1;Lcp1;Tnfsf9;Fcgr2b;Mnda;Batf;Timp1;Aif1;Tec;Hmox1;Il12b;Irf4;Cd86;Tacr1;Foxf1;Selp;Mafb;Cd83;Pf4;Lat;Serpine2;Ccl2;Slc7a11;Igf1;Tnfrsf4;Tyrobp;Spi1;Gpr183;Fgb;Fgg;Lgals3;Adra2a;Mt2A;Ubd;Pdcd1lg2
GO:0048511	rhythmic process	26	258	0.0485953	0.402292	25154;25054;79431;24498;25448;84387;170913;24890;304608;286896;24848;305509;29290;24773;81707;191573;83731;24950;25557;29200;25553;310395;83516;287526;114090;25589	Pgr;Ntrk2;Bhlhe40;Il6;Cenpi;Pglyrp1;Abcb1a;Esr1;Mmp19;Sgpl1;Tph1;Adcy1;Adora1;Sftpa1;Mmp14;Grin3a;Kcnma1;Srd5a1;Star;Inhba;Slc6a4;Ccr4;Ppargc1a;Serpinf1;Egr2;Kdr
GO:2000146	negative regulation of cell motility	16	141	0.0487566	0.402964	498335;60582;25728;116680;287526;84032;24832;83516;117029;24770;685692;29610;29186;116510;29290;29427	Cxcl13;Il1rn;Apoe;Ptpru;Serpinf1;Col3a1;Thy1;Ppargc1a;Ccr5;Ccl2;Gcsam;Tgfbr3;Cd63;Timp1;Adora1;Aif1
GO:0007093	mitotic cell cycle checkpoint	11	86	0.049281	0.404358	360243;304477;296137;54237;298884;315852;363227;25203;308768;24571;25515	Top2a;Kntc1;Bub1;Cdk1;Gen1;Ttk;Nabp1;Ccnb1;Ticrr;Muc1;Plk1
GO:0002040	sprouting angiogenesis	7	45	0.0494199	0.404358	89804;58966;314818;117029;306636;64536;25589	Tek;Ramp2;E2f7;Ccr5;Efnb2;Esm1;Kdr
GO:0032570	response to progesterone	7	45	0.0494199	0.404358	58966;170897;25154;24807;24770;24232;364018	Ramp2;Sphk1;Pgr;Tacr1;Ccl2;C3;Ncf2
GO:0060425	lung morphogenesis	7	45	0.0494199	0.404358	252929;116640;289229;687536;140586;24482;25425	Ctsz;Tnc;Vangl2;Foxf1;Sox9;Igf1;Ctsh
GO:0007618	mating	7	45	0.0494199	0.404358	29597;50672;25154;24807;25553;29143;29366	P2ry2;Ednrb;Pgr;Tacr1;Slc6a4;Grn;Serpine2
GO:0071322	cellular response to carbohydrate stimulus	12	97	0.0499372	0.404358	84403;314386;79129;287526;63997;191575;25083;25557;64041;113936;25627;24310	Gjb6;Gpr68;Cyba;Serpinf1;Slc29a1;Nme1;Adra2a;Star;Birc5;Cpb2;Cma1;Ace
GO:0048522	positive regulation of cellular process	237	3054	0.0502698	0.404358	29597;85497;81819;499342;24498;113901;24493;310621;245920;81726;360711;24392;353250;29465;315298;296368;24251;304988;29610;24962;83731;29290;311374;54264;311336;498840;498335;89804;360243;58966;314386;65161;291100;287885;362510;191575;25453;29200;24787;311723;289054;60350;25694;25515;50672;289229;679975;29455;117264;81639;24464;58814;58812;25589;292301;366949;83781;309304;498638;114203;25524;2572…	P2ry2;Klf15;Pax8;Cd274;Il6;Chia;Il1a;Iqgap3;Cxcl10;Mvd;RGD1310335;Gja1;Niacr1;Trpv2;Racgap1;Ube2c;Cd53;Mnda;Tgfbr3;Cth;Kcnma1;Adora1;Duoxa1;Mafb;Nusap1;Tmem173;Cxcl13;Tek;Top2a;Ramp2;Gpr68;Litaf;Irf4;Sectm1a;Melk;Nme1;Gdnf;Inhba;Sod2;Sox18;Aspm;Cd14;Has2;Plk1;Ednrb;Vangl2;Gpr183;Gdf15;P2ry6;Alox15;Hp;Tmod2;Apln;Kdr;T;Mafa;Lgals3;Pdcd1lg2;Msr1;Sh2b2;Psap;Apoe;Clic1;Rab7b;Ntrk2;Cdk1;Fgb;Ctsh;Epas1;…
GO:0098581	detection of external biotic stimulus	4	18	0.0503738	0.404358	301227;84387;406161;448830	Trem2;Pglyrp1;C4b;Ly96
GO:1902850	microtubule cytoskeleton organization involved in mitosis	4	18	0.0503738	0.404358	315298;296344;114482;171304	Racgap1;Mybl2;Nek2;Kif11
GO:0006855	drug transmembrane transport	4	18	0.0503738	0.404358	360539;24891;24904;170913	Slc47a1;Abcb4;Slc22a1;Abcb1a
GO:0032891	negative regulation of organic acid transport	4	18	0.0503738	0.404358	29290;25569;60582;113976	Adora1;Trh;Il1rn;Acsl4
GO:0002507	tolerance induction	4	18	0.0503738	0.404358	24232;64545;84007;56822	C3;Icos;C3ar1;Cd86
GO:0033762	response to glucagon	4	18	0.0503738	0.404358	29221;81718;24953;114494	Arg1;Cdo1;Gcgr;Ccna2
GO:0042044	fluid transport	4	18	0.0503738	0.404358	117558;50672;25694;315190	Mylk2;Ednrb;Has2;Upk3a
GO:0010447	response to acidic pH	4	18	0.0503738	0.404358	25364;287526;63865;299242	Asic2;Serpinf1;Lgmn;Gpr65
GO:0030835	negative regulation of actin filament depolymerization	4	18	0.0503738	0.404358	316521;297339;24171;296654	Vil1;Capg;Add2;Gsn
GO:0046457	prostanoid biosynthetic process	4	18	0.0503738	0.404358	58962;59103;170897;24886	Hpgds;Ptges;Sphk1;Tbxas1
GO:0001516	prostaglandin biosynthetic process	4	18	0.0503738	0.404358	58962;59103;170897;24886	Hpgds;Ptges;Sphk1;Tbxas1
GO:0046883	regulation of hormone secretion	20	188	0.0507465	0.4067	360034;59267;289949;81819;24392;353250;314386;24366;24367;289747;24807;29200;25083;24498;64041;81820;58812;25027;29290;25569	Myrip;Syt7;Fam3d;Pax8;Gja1;Niacr1;Gpr68;Fgb;Fgg;Osm;Tacr1;Inhba;Adra2a;Il6;Birc5;Doc2b;Apln;Slc16a1;Adora1;Trh
GO:0032611	interleukin-1 beta production	6	36	0.0521011	0.415409	170897;691998;25732;117029;25542;25627	Sphk1;Nlrp1b;Acp5;Ccr5;Ccl3;Cma1
GO:0030431	sleep	6	36	0.0521011	0.415409	63997;24950;24498;25557;84387;29290	Slc29a1;Srd5a1;Il6;Star;Pglyrp1;Adora1
GO:0048512	circadian behavior	6	36	0.0521011	0.415409	24950;24498;25557;84387;83731;29290	Srd5a1;Il6;Star;Pglyrp1;Kcnma1;Adora1
GO:0002696	positive regulation of leukocyte activation	19	177	0.0521638	0.415409	64546;24498;353218;64545;56822;499342;24807;24832;25316;25704;361226;679975;362076;24770;29427;688090;24482;25572;309304	Il12b;Il6;Tnfsf9;Icos;Cd86;Cd274;Tacr1;Thy1;Ms4a2;Il2ra;Cd83;Gpr183;Il36b;Ccl2;Aif1;RT1-Bb;Igf1;Tnfrsf4;Pdcd1lg2
GO:0048678	response to axon injury	9	66	0.052899	0.41721	114122;116640;25728;50568;54237;114097;24787;29427;29221	Vcan;Tnc;Apoe;Cspg5;Cdk1;Ltc4s;Sod2;Aif1;Arg1
GO:0007229	integrin-mediated signaling pathway	9	66	0.052899	0.41721	361537;305253;84032;362800;116510;81511;29186;361303;84492	Tyrobp;Adamts3;Col3a1;Itgb8;Timp1;Lat;Cd63;Lims2;Tec
GO:0030261	chromosome condensation	5	27	0.0531371	0.41721	360243;684771;54237;25203;311336	Top2a;Cdca5;Cdk1;Ccnb1;Nusap1
GO:0009620	response to fungus	5	27	0.0531371	0.41721	24498;689388;361422;56822;171569	Il6;Ptx3;Cotl1;Cd86;Spon2
GO:0034724	DNA replication-independent nucleosome organization	5	27	0.0531371	0.41721	304648;680097;100912290;100360950;288272	Asf1b;LOC680097;LOC100912290;LOC100360950;Mis18a
GO:0006336	DNA replication-independent nucleosome assembly	5	27	0.0531371	0.41721	304648;680097;100912290;100360950;288272	Asf1b;LOC680097;LOC100912290;LOC100360950;Mis18a
GO:0035587	purinergic receptor signaling pathway	5	27	0.0531371	0.41721	29290;63843;117264;353250;29597	Adora1;P2ry4;P2ry6;Niacr1;P2ry2
GO:0030837	negative regulation of actin filament polymerization	5	27	0.0531371	0.41721	316521;297339;24171;296654;50665	Vil1;Capg;Add2;Gsn;Tmsb10
GO:0045806	negative regulation of endocytosis	5	27	0.0531371	0.41721	83781;25350;65171;192211;289211	Lgals3;Sftpd;Scamp5;Prom2;Fcgr2b
GO:0014075	response to amine	7	46	0.0538885	0.420586	50592;170897;81503;54237;191575;29221;114105	Gria1;Sphk1;Cxcl1;Cdk1;Nme1;Arg1;Cxcl2
GO:0050729	positive regulation of inflammatory response	8	56	0.0539138	0.420586	305355;117029;24498;81743;25542;24232;50654;24310	Tlr10;Ccr5;Il6;Pde2a;Ccl3;C3;Ctss;Ace
GO:0002688	regulation of leukocyte chemotaxis	8	56	0.0539138	0.420586	498335;245920;84007;287561;24770;116637;25542;29427	Cxcl13;Cxcl10;C3ar1;Ccl7;Ccl2;Ccl4;Ccl3;Aif1
GO:0035690	cellular response to drug	8	56	0.0539138	0.420586	117038;289237;191575;313339;689415;81743;24770;25364	Mt3;Slamf8;Nme1;Acer2;Mt2A;Pde2a;Ccl2;Asic2
GO:0006812	cation transport	72	844	0.0539857	0.420586	293650;25334;170899;29366;24832;25316;29599;116745;24213;116637;65199;287106;170913;24770;117258;117038;58966;245920;29292;259243;24392;29465;81503;25017;79129;100909725;24482;315611;684516;306811;100362384;83731;29290;117596;24310;83567;24777;305236;24904;191573;116649;117029;50599;25453;25364;100360087;25553;297932;29186;317170;29221;685232;365391;362861;29639;306009;170824;25753;287562;301086;…	Tcirg1;Bhlha15;Kcnk2;Serpine2;Thy1;Ms4a2;Atp2b3;Kcnh6;Atp1a3;Ccl4;Kcnip3;Prss30;Abcb1a;Ccl2;Cntn1;Mt3;Ramp2;Cxcl10;Ftl1;Kcnip4;Gja1;Trpv2;Cxcl1;Myo5a;Cyba;LOC100909725;Igf1;Scn4b;Kcnc4;Wnk2;LOC100362384;Kcnma1;Adora1;Atp6v1b2;Ace;Mchr1;Slc10a1;Cxcl11;Slc22a1;Grin3a;Kcnj4;Ccr5;Kcnj3;Gdnf;Asic2;LOC100360087;Slc6a4;Atp6v0d2;Cd63;Slc9a7;Arg1;Atp6v1a;Trpm5;Slc41a2;Fxyd2;Slc39a14;Steap3;Chrng;Ccl12;Xcr…
GO:0048608	reproductive structure development	36	384	0.0542767	0.422199	25524;25154;299210;24950;364754;117524;25448;83791;170913;24890;304608;295691;24310;286896;310344;29637;81707;24479;116640;155430;24883;25557;29200;691657;498997;29366;289054;24482;25453;314818;50549;287526;29452;50692;140586;25589	Psap;Pgr;Esrrb;Srd5a1;Fzd8;Ccnf;Cenpi;Fdps;Abcb1a;Esr1;Mmp19;Frzb;Ace;Sgpl1;Plk4;Hmgcs1;Mmp14;Idh1;Tnc;Hey2;Wt1;Star;Inhba;Crip1;Rspo3;Serpine2;Aspm;Igf1;Gdnf;E2f7;Cyp4a1;Serpinf1;Epas1;Plaur;Sox9;Kdr
GO:0002460	adaptive immune response based on somatic recombination of immune receptors built from immunoglobulin superfamily domains	19	178	0.0543692	0.422264	64546;362634;84007;289211;298566;29687;291100;24988;25425;24498;192262;295703;299206;79126;24232;688090;117512;406161;24237	Il12b;C1qc;C3ar1;Fcgr2b;C1qa;C1qb;Irf4;RT1-M2;Ctsh;Il6;C1s;Serping1;Batf;Cfi;C3;RT1-Bb;C9;C4b;C6
GO:0002694	regulation of leukocyte activation	28	286	0.0551701	0.424579	362076;499342;25350;24832;25316;25704;24498;679975;84387;688090;291675;353218;289211;304988;29427;24451;64546;64545;56822;687536;24807;361226;81511;24770;24482;25572;83781;309304	Il36b;Cd274;Sftpd;Thy1;Ms4a2;Il2ra;Il6;Gpr183;Pglyrp1;RT1-Bb;Mzb1;Tnfsf9;Fcgr2b;Mnda;Aif1;Hmox1;Il12b;Icos;Cd86;Foxf1;Tacr1;Cd83;Lat;Ccl2;Igf1;Tnfrsf4;Lgals3;Pdcd1lg2
GO:0050793	regulation of developmental process	120	1480	0.0554884	0.424579	29597;81819;298282;24498;84387;24493;100912290;310621;245920;24392;29465;315691;29692;304988;29610;24848;54264;89804;117092;58966;314386;191575;25453;29200;24787;289054;100360950;311374;83620;361537;50672;289229;29455;306636;25589;498638;362634;25728;406864;25054;54237;25425;83791;117258;60582;84032;24476;306748;24770;24310;84510;680097;56822;89824;24883;362235;287526;360918;25203;24832;113936;29…	P2ry2;Pax8;Oma1;Il6;Pglyrp1;Il1a;LOC100912290;Iqgap3;Cxcl10;Gja1;Trpv2;Lingo1;Pla2g2a;Mnda;Tgfbr3;Tph1;Mafb;Tek;Serpinb7;Ramp2;Gpr68;Nme1;Gdnf;Inhba;Sod2;Aspm;LOC100360950;Duoxa1;Cit;Tyrobp;Ednrb;Vangl2;Gdf15;Efnb2;Kdr;Msr1;C1qc;Apoe;Clic1;Ntrk2;Cdk1;Ctsh;Fdps;Cntn1;Il1rn;Col3a1;Iapp;Cxcl14;Ccl2;Ace;Stmn2;LOC680097;Cd86;Chi3l1;Wt1;Syndig1;Serpinf1;Pf4;Ccnb1;Thy1;Cpb2;Tmem176a;Enpp3;Dmbt1;Il2ra;Mt…
GO:0001667	ameboidal cell migration	22	214	0.0557114	0.424579	25728;29186;293118;25425;286896;29610;81687;65048;498335;89804;24807;116510;117029;25453;311723;50672;287526;306636;367166;140586;25589;316521	Apoe;Cd63;Prcp;Ctsh;Sgpl1;Tgfbr3;Mmp9;Fat2;Cxcl13;Tek;Tacr1;Timp1;Ccr5;Gdnf;Sox18;Ednrb;Serpinf1;Efnb2;Hyal1;Sox9;Kdr;Vil1
GO:0048015	phosphatidylinositol-mediated signaling	12	99	0.0559536	0.424579	89804;297814;25339;58949;25054;25651;296654;140586;116720;29366;25589;24482	Tek;Car8;Npr3;Ptafr;Ntrk2;Selp;Gsn;Sox9;Pik3c2g;Serpine2;Kdr;Igf1
GO:0048017	inositol lipid-mediated signaling	12	99	0.0559536	0.424579	89804;297814;25339;58949;25054;25651;296654;140586;116720;29366;25589;24482	Tek;Car8;Npr3;Ptafr;Ntrk2;Selp;Gsn;Sox9;Pik3c2g;Serpine2;Kdr;Igf1
GO:0051271	negative regulation of cellular component movement	16	144	0.0560893	0.424579	498335;60582;25728;116680;287526;84032;24832;83516;117029;24770;685692;29610;29186;116510;29290;29427	Cxcl13;Il1rn;Apoe;Ptpru;Serpinf1;Col3a1;Thy1;Ppargc1a;Ccr5;Ccl2;Gcsam;Tgfbr3;Cd63;Timp1;Adora1;Aif1
GO:0040008	regulation of growth	39	423	0.0565269	0.424579	367166;292060;170897;65154;54237;117038;24333;83791;246074;24232;295691;25728;24392;29465;680522;79129;24251;63865;24962;29639;171112;81707;64546;155430;289747;117029;24883;29200;25553;29366;24482;113976;50568;286896;245918;81639;64536;689415;25203	Hyal1;Irf8;Sphk1;Wisp1;Cdk1;Mt3;Eno1;Fdps;Scd1;C3;Frzb;Apoe;Gja1;Trpv2;Hist1h1b;Cyba;Cd53;Lgmn;Cth;Fxyd2;Wfdc1;Mmp14;Il12b;Hey2;Osm;Ccr5;Wt1;Inhba;Slc6a4;Serpine2;Igf1;Acsl4;Cspg5;Sgpl1;Cgref1;Alox15;Esm1;Mt2A;Ccnb1
GO:0030100	regulation of endocytosis	15	133	0.0571898	0.424579	689388;25350;289211;83781;192211;81639;25544;65171;29186;24770;24232;60350;65178;24773;406161	Ptx3;Sftpd;Fcgr2b;Lgals3;Prom2;Alox15;Sele;Scamp5;Cd63;Ccl2;C3;Cd14;Snap91;Sftpa1;C4b
GO:0043603	cellular amide metabolic process	15	133	0.0571898	0.424579	266758;24787;25728;25335;289596;362619;25425;81869;498992;24962;294422;29221;25627;24310;24479	Sec11c;Sod2;Apoe;Mmp7;Corin;Smpdl3b;Ctsh;Gstm7;Vnn3;Cth;Smpdl3a;Arg1;Cma1;Ace;Idh1
GO:0002790	peptide secretion	20	191	0.0571987	0.424579	360034;59267;289949;60582;24392;314386;24366;24367;25335;25083;24498;64041;81820;58812;25027;29290;25569;366949;25017;81819	Myrip;Syt7;Fam3d;Il1rn;Gja1;Gpr68;Fgb;Fgg;Mmp7;Adra2a;Il6;Birc5;Doc2b;Apln;Slc16a1;Adora1;Trh;Mafa;Myo5a;Pax8
GO:0071417	cellular response to organonitrogen compound	31	324	0.057323	0.424579	29597;85497;89813;114203;24950;24953;497672;170913;25017;291675;60582;83504;84032;79129;24795;81869;24614;81743;29427;29393;50592;24883;25557;301227;25383;25553;24770;29221;140586;114090;499870	P2ry2;Klf15;Pdk4;Sh2b2;Srd5a1;Gcgr;Brca1;Abcb1a;Myo5a;Mzb1;Il1rn;Kl;Col3a1;Cyba;Serpina3n;Gstm7;Orm1;Pde2a;Aif1;Col1a1;Gria1;Wt1;Star;Trem2;Apobec1;Slc6a4;Ccl2;Arg1;Sox9;Egr2;Rad51
GO:0031670	cellular response to nutrient	6	37	0.0573685	0.424579	116640;114097;24599;24451;308100;29393	Tnc;Ltc4s;Nos2;Hmox1;Acat2;Col1a1
GO:0032272	negative regulation of protein polymerization	6	37	0.0573685	0.424579	24171;84510;50665;296654;297339;316521	Add2;Stmn2;Tmsb10;Gsn;Capg;Vil1
GO:0060420	regulation of heart growth	6	37	0.0573685	0.424579	24392;155430;54237;24883;25203;83791	Gja1;Hey2;Cdk1;Wt1;Ccnb1;Fdps
GO:1901532	regulation of hematopoietic progenitor cell differentiation	6	37	0.0573685	0.424579	501854;680097;360918;25589;100360950;100912290	Rab7b;LOC680097;Pf4;Kdr;LOC100360950;LOC100912290
GO:0050848	regulation of calcium-mediated signaling	6	37	0.0573685	0.424579	498075;116637;301227;25542;25589;24482	Trat1;Ccl4;Trem2;Ccl3;Kdr;Igf1
GO:0032613	interleukin-10 production	6	37	0.0573685	0.424579	64546;499342;500590;289211;291100;361226	Il12b;Cd274;Tnfrsf9;Fcgr2b;Irf4;Cd83
GO:0035810	positive regulation of urine volume	3	11	0.0577215	0.424579	25339;50672;25694	Npr3;Ednrb;Has2
GO:0032494	response to peptidoglycan	3	11	0.0577215	0.424579	24498;113959;301227	Il6;C5ar1;Trem2
GO:0060347	heart trabecula formation	3	11	0.0577215	0.424579	89804;29610;155430	Tek;Tgfbr3;Hey2
GO:1901739	regulation of myoblast fusion	3	11	0.0577215	0.424579	245920;29455;24251	Cxcl10;Gdf15;Cd53
GO:0046519	sphingoid metabolic process	3	11	0.0577215	0.424579	313339;170897;314438	Acer2;Sphk1;Degs2
GO:0090192	regulation of glomerulus development	3	11	0.0577215	0.424579	24883;117092;84007	Wt1;Serpinb7;C3ar1
GO:0001977	renal system process involved in regulation of blood volume	3	11	0.0577215	0.424579	29290;79129;24392	Adora1;Cyba;Gja1
GO:0032306	regulation of prostaglandin secretion	3	11	0.0577215	0.424579	29597;24493;113976	P2ry2;Il1a;Acsl4
GO:0032310	prostaglandin secretion	3	11	0.0577215	0.424579	29597;24493;113976	P2ry2;Il1a;Acsl4
GO:1901722	regulation of cell proliferation involved in kidney development	3	11	0.0577215	0.424579	24883;117092;84007	Wt1;Serpinb7;C3ar1
GO:0055015	ventricular cardiac muscle cell development	3	11	0.0577215	0.424579	54237;25203;155430	Cdk1;Ccnb1;Hey2
GO:0002921	negative regulation of humoral immune response	3	11	0.0577215	0.424579	100911545;295703;289211	LOC100911545;Serping1;Fcgr2b
GO:0044116	growth of symbiont involved in interaction with host	4	19	0.0579624	0.424579	64546;246074;84387;292060	Il12b;Scd1;Pglyrp1;Irf8
GO:0044117	growth of symbiont in host	4	19	0.0579624	0.424579	64546;246074;84387;292060	Il12b;Scd1;Pglyrp1;Irf8
GO:0045932	negative regulation of muscle contraction	4	19	0.0579624	0.424579	24212;29290;25083;83731	Atp1a2;Adora1;Adra2a;Kcnma1
GO:0001945	lymph vessel development	4	19	0.0579624	0.424579	306636;25589;287129;311723	Efnb2;Kdr;Tmem204;Sox18
GO:0097009	energy homeostasis	4	19	0.0579624	0.424579	298282;316842;83516;293118	Oma1;Metrnl;Ppargc1a;Prcp
GO:0044110	growth involved in symbiotic interaction	4	19	0.0579624	0.424579	64546;246074;84387;292060	Il12b;Scd1;Pglyrp1;Irf8
GO:0009595	detection of biotic stimulus	4	19	0.0579624	0.424579	301227;84387;406161;448830	Trem2;Pglyrp1;C4b;Ly96
GO:0035588	G-protein coupled purinergic receptor signaling pathway	4	19	0.0579624	0.424579	29290;63843;117264;29597	Adora1;P2ry4;P2ry6;P2ry2
GO:0042744	hydrogen peroxide catabolic process	4	19	0.0579624	0.424579	117254;24464;113898;266807	Prdx1;Hp;Prdx5;Duox1
GO:0043114	regulation of vascular permeability	4	19	0.0579624	0.424579	116637;24807;58966;81743	Ccl4;Tacr1;Ramp2;Pde2a
GO:0007160	cell-matrix adhesion	14	122	0.0581124	0.425058	89804;298185;24366;24367;84032;362800;24832;363060;313339;304913;60379;29186;25589;81707	Tek;Frem1;Fgb;Fgg;Col3a1;Itgb8;Thy1;Plet1;Acer2;Tnn;Col5a3;Cd63;Kdr;Mmp14
GO:1903510	mucopolysaccharide metabolic process	7	47	0.0586013	0.428011	306251;24649;367166;295934;25589;307859;25694	Itih1;Pim1;Hyal1;Chst1;Kdr;Chst5;Has2
GO:0007589	body fluid secretion	11	89	0.0590276	0.428376	29597;25339;25059;63997;79129;24807;191575;81718;83731;170913;29290	P2ry2;Npr3;Hk2;Slc29a1;Cyba;Tacr1;Nme1;Cdo1;Kcnma1;Abcb1a;Adora1
GO:0007010	cytoskeleton organization	59	680	0.0590822	0.428376	114203;300795;301701;24832;296654;311325;117524;308761;25203;680280;25542;309760;315330;306575;296344;50665;171304;315298;310344;311327;114482;58814;298850;29427;689069;497672;296846;311336;89804;84510;306071;311546;24807;299242;500464;361308;298884;24770;289054;25027;29437;25515;83620;24171;24383;287562;308064;289229;287561;294286;291441;64041;171529;81639;140586;297339;24915;54227;316521	Sh2b2;Ns5atp9;Ndc80;Thy1;Gsn;Knstrn;Ccnf;Prc1;Ccnb1;Gas2l3;Ccl3;Mypn;Espl1;Ckap2;Mybl2;Tmsb10;Kif11;Racgap1;Plk4;Casc5;Nek2;Tmod2;Cenpa;Aif1;Parvg;Brca1;Hepacam2;Nusap1;Tek;Stmn2;Lcp1;Tpx2;Tacr1;Gpr65;Epb41l4b;Kif20a;Gen1;Ccl2;Aspm;Slc16a1;Acta1;Plk1;Cit;Add2;Gapdh;Ccl12;Cep72;Vangl2;Ccl7;Kifc1;Ska1;Birc5;Kif2c;Alox15;Sox9;Capg;Pdlim4;Arpc1b;Vil1
GO:0050854	regulation of antigen receptor-mediated signaling pathway	5	28	0.0594186	0.428376	293783;685692;83781;498075;24832	Lpxn;Gcsam;Lgals3;Trat1;Thy1
GO:0045909	positive regulation of vasodilation	5	28	0.0594186	0.428376	25589;24599;24392;58812;25083	Kdr;Nos2;Gja1;Apln;Adra2a
GO:0043303	mast cell degranulation	5	28	0.0594186	0.428376	317676;687536;81511;25316;24451	Lat2;Foxf1;Lat;Ms4a2;Hmox1
GO:0044784	metaphase/anaphase transition of cell cycle	5	28	0.0594186	0.428376	360161;83620;171576;360621;25515	Nek6;Cit;Bub1b;Cdc6;Plk1
GO:0061640	cytoskeleton-dependent cytokinesis	5	28	0.0594186	0.428376	306575;294074;315298;311336;25515	Ckap2;Cep55;Racgap1;Nusap1;Plk1
GO:0051851	modification by host of symbiont morphology or physiology	5	28	0.0594186	0.428376	689388;116637;60665;301229;25542	Ptx3;Ccl4;Cxcl6;Trem1;Ccl3
GO:0007091	metaphase/anaphase transition of mitotic cell cycle	5	28	0.0594186	0.428376	360161;83620;171576;360621;25515	Nek6;Cit;Bub1b;Cdc6;Plk1
GO:0044770	cell cycle phase transition	24	240	0.0599217	0.431385	171576;304477;54237;64041;25203;170913;308768;360161;24571;310621;29427;684771;360243;315852;363227;314818;29200;114494;25515;83620;360621;296137;24649;64625	Bub1b;Kntc1;Cdk1;Birc5;Ccnb1;Abcb1a;Ticrr;Nek6;Muc1;Iqgap3;Aif1;Cdca5;Top2a;Ttk;Nabp1;E2f7;Inhba;Ccna2;Plk1;Cit;Cdc6;Bub1;Pim1;Bid
GO:0061458	reproductive system development	36	388	0.0604938	0.434775	25524;25154;299210;24950;364754;117524;25448;83791;170913;24890;304608;295691;24310;286896;310344;29637;81707;24479;116640;155430;24883;25557;29200;691657;498997;29366;289054;24482;25453;314818;50549;287526;29452;50692;140586;25589	Psap;Pgr;Esrrb;Srd5a1;Fzd8;Ccnf;Cenpi;Fdps;Abcb1a;Esr1;Mmp19;Frzb;Ace;Sgpl1;Plk4;Hmgcs1;Mmp14;Idh1;Tnc;Hey2;Wt1;Star;Inhba;Crip1;Rspo3;Serpine2;Aspm;Igf1;Gdnf;E2f7;Cyp4a1;Serpinf1;Epas1;Plaur;Sox9;Kdr
GO:0001655	urogenital system development	28	289	0.0606461	0.434775	85497;25524;81819;24950;24890;25425;117092;286896;25694;363265;24310;116640;294071;691857;315190;687536;24883;691657;24482;81687;25453;289229;84007;50549;287526;50692;140586;50654	Klf15;Psap;Pax8;Srd5a1;Esr1;Ctsh;Serpinb7;Sgpl1;Has2;Col4a3;Ace;Tnc;Hells;Pygo1;Upk3a;Foxf1;Wt1;Crip1;Igf1;Mmp9;Gdnf;Vangl2;C3ar1;Cyp4a1;Serpinf1;Plaur;Sox9;Ctss
GO:0048145	regulation of fibroblast proliferation	9	68	0.0606845	0.434775	170897;24832;114494;24787;25203;290644;24890;24482;81687	Sphk1;Thy1;Ccna2;Sod2;Ccnb1;Ifi30;Esr1;Igf1;Mmp9
GO:0009749	response to glucose	18	169	0.0607388	0.434775	24392;84403;314386;24533;25627;79129;287526;63997;191575;25083;25557;64041;113936;363265;25569;366949;364018;24310	Gja1;Gjb6;Gpr68;Ldha;Cma1;Cyba;Serpinf1;Slc29a1;Nme1;Adra2a;Star;Birc5;Cpb2;Col4a3;Trh;Mafa;Ncf2;Ace
GO:0050679	positive regulation of epithelial cell proliferation	14	123	0.0610379	0.436025	113959;79129;24807;191575;24498;367166;140586;29143;24770;25589;29221;117033;24482;310621	C5ar1;Cyba;Tacr1;Nme1;Il6;Hyal1;Sox9;Grn;Ccl2;Kdr;Arg1;Mmp12;Igf1;Iqgap3
GO:0007346	regulation of mitotic cell cycle	27	277	0.0610868	0.436025	171576;304477;170897;54237;64041;25203;308768;360161;24571;24493;296368;29427;360243;315852;311546;114494;314818;298884;363227;24482;25515;83620;360621;311336;296137;309523;64625	Bub1b;Kntc1;Sphk1;Cdk1;Birc5;Ccnb1;Ticrr;Nek6;Muc1;Il1a;Ube2c;Aif1;Top2a;Ttk;Tpx2;Ccna2;E2f7;Gen1;Nabp1;Igf1;Plk1;Cit;Cdc6;Nusap1;Bub1;Kif20b;Bid
GO:0046165	alcohol biosynthetic process	13	112	0.0618969	0.44118	81726;25728;140868;58949;89784;140910;313339;25557;29637;83791;64191;365345;25427	Mvd;Apoe;Fabp5;Ptafr;Idi1;Msmo1;Acer2;Star;Hmgcs1;Fdps;Dhcr7;Cyb5r2;Cyp51
GO:0044255	cellular lipid metabolic process	54	618	0.0621903	0.442643	499264;25330;25524;25728;25154;140868;309014;24950;362619;117038;116720;690625;83791;83792;246074;24232;361993;24890;59103;362800;81726;170897;286896;25017;29692;313339;29637;316330;497672;24451;58962;287424;79242;89813;311569;170635;140910;25557;24886;114097;113976;83516;50671;171142;296138;50549;25086;89784;314360;81639;282838;79223;314438;294422	Apobr;Lipe;Psap;Apoe;Pgr;Fabp5;Ppapdc1a;Srd5a1;Smpdl3b;Mt3;Pik3c2g;Oc90;Fdps;Scd;Scd1;C3;Them5;Esr1;Ptges;Itgb8;Mvd;Sphk1;Sgpl1;Myo5a;Pla2g2a;Acer2;Hmgcs1;Ankrd23;Brca1;Hmox1;Hpgds;Aloxe3;Hpgd;Pdk4;Acss2;Dhrs9;Msmo1;Star;Tbxas1;Ltc4s;Acsl4;Ppargc1a;Fasn;Lbp;Acoxl;Cyp4a1;Cyp2e1;Idi1;Galc;Alox15;Gm2a;Gk;Degs2;Smpdl3a
GO:0032946	positive regulation of mononuclear cell proliferation	11	90	0.0625394	0.443871	64546;353218;56822;24807;25704;24498;679975;29427;24482;25572;309304	Il12b;Tnfsf9;Cd86;Tacr1;Il2ra;Il6;Gpr183;Aif1;Igf1;Tnfrsf4;Pdcd1lg2
GO:0050671	positive regulation of lymphocyte proliferation	11	90	0.0625394	0.443871	64546;353218;56822;24807;25704;24498;679975;29427;24482;25572;309304	Il12b;Tnfsf9;Cd86;Tacr1;Il2ra;Il6;Gpr183;Aif1;Igf1;Tnfrsf4;Pdcd1lg2
GO:0010660	regulation of muscle cell apoptotic process	6	38	0.062943	0.445269	64546;155430;308099;24482;81680;24451	Il12b;Hey2;Fndc1;Igf1;Lifr;Hmox1
GO:0051225	spindle assembly	6	38	0.062943	0.445269	296344;171304;294286;315298;114482;289054	Mybl2;Kif11;Kifc1;Racgap1;Nek2;Aspm
GO:0050863	regulation of T cell activation	18	170	0.0632785	0.445269	64546;24498;353218;64545;25350;56822;499342;83781;24832;25704;361226;362076;81511;24770;29427;688090;24482;309304	Il12b;Il6;Tnfsf9;Icos;Sftpd;Cd86;Cd274;Lgals3;Thy1;Il2ra;Cd83;Il36b;Lat;Ccl2;Aif1;RT1-Bb;Igf1;Pdcd1lg2
GO:0035821	modification of morphology or physiology of other organism	7	48	0.0635599	0.445269	60665;117029;689388;116637;25542;301229;81687	Cxcl6;Ccr5;Ptx3;Ccl4;Ccl3;Trem1;Mmp9
GO:0042886	amide transport	24	242	0.0641438	0.445269	289949;81819;170897;25335;24498;64041;25569;25017;60582;24392;314386;81820;29290;360034;315190;65161;25027;59267;24366;24367;117254;25083;58812;366949	Fam3d;Pax8;Sphk1;Mmp7;Il6;Birc5;Trh;Myo5a;Il1rn;Gja1;Gpr68;Doc2b;Adora1;Myrip;Upk3a;Litaf;Slc16a1;Syt7;Fgb;Fgg;Prdx1;Adra2a;Apln;Mafa
GO:0051928	positive regulation of calcium ion transport	9	69	0.0648373	0.445269	245920;305236;29465;83781;24832;116637;25542;24770;83567	Cxcl10;Cxcl11;Trpv2;Lgals3;Thy1;Ccl4;Ccl3;Ccl2;Mchr1
GO:0071805	potassium ion transmembrane transport	15	136	0.0657338	0.445269	684516;259243;170899;100909725;116649;24212;50599;116745;24213;116695;65199;64120;83731;365391;317170	Kcnc4;Kcnip4;Kcnk2;LOC100909725;Kcnj4;Atp1a2;Kcnj3;Kcnh6;Atp1a3;Kcnd1;Kcnip3;Kcnk13;Kcnma1;Trpm5;Slc9a7
GO:0071804	cellular potassium ion transport	15	136	0.0657338	0.445269	684516;259243;170899;100909725;116649;24212;50599;116745;24213;116695;65199;64120;83731;365391;317170	Kcnc4;Kcnip4;Kcnk2;LOC100909725;Kcnj4;Atp1a2;Kcnj3;Kcnh6;Atp1a3;Kcnd1;Kcnip3;Kcnk13;Kcnma1;Trpm5;Slc9a7
GO:0071248	cellular response to metal ion	12	102	0.0658577	0.445269	117038;25203;56822;287526;288589;81639;25557;296654;689415;24599;24451;81687	Mt3;Ccnb1;Cd86;Serpinf1;Rasa4;Alox15;Star;Gsn;Mt2A;Nos2;Hmox1;Mmp9
GO:0022603	regulation of anatomical structure morphogenesis	52	595	0.0658851	0.445269	81819;25728;170897;298282;25054;24832;25425;24498;497672;25542;24232;24493;24890;117038;81687;245920;60582;29465;24251;292406;29610;363265;24237;24451;29393;89804;58966;155430;89824;363672;117029;25453;497979;292935;24770;361303;83620;24883;287562;289229;84007;287561;29455;287526;360918;367166;140586;113936;25589;282836;316521;25627	Pax8;Apoe;Sphk1;Oma1;Ntrk2;Thy1;Ctsh;Il6;Brca1;Ccl3;C3;Il1a;Esr1;Mt3;Mmp9;Cxcl10;Il1rn;Trpv2;Cd53;Thbs2;Tgfbr3;Col4a3;C6;Hmox1;Col1a1;Tek;Ramp2;Hey2;Chi3l1;Sp6;Ccr5;Gdnf;Tmem100;Htatip2;Ccl2;Lims2;Cit;Wt1;Ccl12;Vangl2;C3ar1;Ccl7;Gdf15;Serpinf1;Pf4;Hyal1;Sox9;Cpb2;Kdr;Cthrc1;Vil1;Cma1
GO:0060512	prostate gland morphogenesis	5	29	0.0661035	0.445269	116640;140586;691657;24890;24482	Tnc;Sox9;Crip1;Esr1;Igf1
GO:0071391	cellular response to estrogen stimulus	5	29	0.0661035	0.445269	170913;24890;58940;25033;24950	Abcb1a;Esr1;H2afz;Sstr1;Srd5a1
GO:0060416	response to growth hormone	5	29	0.0661035	0.445269	24464;25557;24614;24950;117099	Hp;Star;Orm1;Srd5a1;Bdh1
GO:0042745	circadian sleep/wake cycle	5	29	0.0661035	0.445269	24498;25557;24950;84387;29290	Il6;Star;Srd5a1;Pglyrp1;Adora1
GO:0051702	interaction with symbiont	5	29	0.0661035	0.445269	689388;116637;60665;301229;25542	Ptx3;Ccl4;Cxcl6;Trem1;Ccl3
GO:0050798	activated T cell proliferation	5	29	0.0661035	0.445269	64546;353218;24482;56822;25704	Il12b;Tnfsf9;Igf1;Cd86;Il2ra
GO:0002279	mast cell activation involved in immune response	5	29	0.0661035	0.445269	317676;687536;81511;25316;24451	Lat2;Foxf1;Lat;Ms4a2;Hmox1
GO:0045123	cellular extravasation	5	29	0.0661035	0.445269	25544;25651;301229;56765;24770	Sele;Selp;Trem1;Plvap;Ccl2
GO:0019369	arachidonic acid metabolic process	4	20	0.0661242	0.445269	50549;81639;287424;170897	Cyp4a1;Alox15;Aloxe3;Sphk1
GO:0032026	response to magnesium ion	4	20	0.0661242	0.445269	24464;24232;60350;170897	Hp;C3;Cd14;Sphk1
GO:0002478	antigen processing and presentation of exogenous peptide antigen	4	20	0.0661242	0.445269	688090;290644;361689;289211	RT1-Bb;Ifi30;Unc93b1;Fcgr2b
GO:0090103	cochlea morphogenesis	4	20	0.0661242	0.445269	282836;140586;289229;295691	Cthrc1;Sox9;Vangl2;Frzb
GO:0010543	regulation of platelet activation	4	20	0.0661242	0.445269	84492;25651;25728;29366	Tec;Selp;Apoe;Serpine2
GO:0002429	immune response-activating cell surface receptor signaling pathway	11	91	0.0661847	0.445269	114203;317676;84007;293783;113959;498075;24832;685692;304988;84492;83781	Sh2b2;Lat2;C3ar1;Lpxn;C5ar1;Trat1;Thy1;Gcsam;Mnda;Tec;Lgals3
GO:0002697	regulation of immune effector process	21	207	0.0667795	0.445269	64546;100911545;89804;25316;289211;83781;687536;60665;171569;25704;24498;295703;24988;84387;24770;498840;24232;291675;24451;25572;24237	Il12b;LOC100911545;Tek;Ms4a2;Fcgr2b;Lgals3;Foxf1;Cxcl6;Spon2;Il2ra;Il6;Serping1;RT1-M2;Pglyrp1;Ccl2;Tmem173;C3;Mzb1;Hmox1;Tnfrsf4;C6
GO:0045785	positive regulation of cell adhesion	14	125	0.0671821	0.445269	64546;498335;89804;24366;24367;687536;25651;117029;81639;367166;29186;25589;24770;25694	Il12b;Cxcl13;Tek;Fgb;Fgg;Foxf1;Selp;Ccr5;Alox15;Hyal1;Cd63;Kdr;Ccl2;Has2
GO:0048732	gland development	36	392	0.0672076	0.445269	25524;81819;25154;24834;24950;24498;170913;24890;295691;310621;25059;81718;117099;29637;29610;24848;54264;116640;63997;687536;191575;24883;314818;113936;691657;29366;304815;361303;24482;29221;287526;50692;24464;140586;24787;308100	Psap;Pax8;Pgr;Tk1;Srd5a1;Il6;Abcb1a;Esr1;Frzb;Iqgap3;Hk2;Cdo1;Bdh1;Hmgcs1;Tgfbr3;Tph1;Mafb;Tnc;Slc29a1;Foxf1;Nme1;Wt1;E2f7;Cpb2;Crip1;Serpine2;Elf3;Lims2;Igf1;Arg1;Serpinf1;Plaur;Hp;Sox9;Sod2;Acat2
GO:0048583	regulation of response to stimulus	176	2252	0.0675301	0.445269	317676;24498;679975;54296;84387;315215;24493;310621;245920;24392;304988;29610;24962;29290;311374;84492;500906;498840;498335;89804;58966;314386;191573;65161;291100;287885;299242;25453;312705;24787;289054;54289;50672;289229;29687;83781;290757;81639;24464;58814;25589;499926;114203;25524;362634;361689;170897;501854;25054;24832;24366;25425;117254;364754;116637;24988;83791;290361;688090;24571;287129;29…	Lat2;Il6;Gpr183;Rgs7;Pglyrp1;Mlc1;Il1a;Iqgap3;Cxcl10;Gja1;Mnda;Tgfbr3;Cth;Adora1;Duoxa1;Tec;Cyth4;Tmem173;Cxcl13;Tek;Ramp2;Gpr68;Grin3a;Litaf;Irf4;Sectm1a;Gpr65;Gdnf;C1r;Sod2;Aspm;Rgs1;Ednrb;Vangl2;C1qb;Lgals3;F11;Alox15;Hp;Tmod2;Kdr;Bpifb1;Sh2b2;Psap;C1qc;Unc93b1;Sphk1;Rab7b;Ntrk2;Thy1;Fgb;Ctsh;Prdx1;Fzd8;Ccl4;RT1-M2;Fdps;Dok2;RT1-Bb;Muc1;Tmem204;Mzb1;Efnb2;Il1rn;Lpxn;Col3a1;Pde2a;Fam20c;Timp1;C…
GO:0043491	protein kinase B signaling	13	114	0.0684317	0.445269	117038;89804;361514;89824;315691;25054;24498;140586;497979;25542;24770;171099;24482	Mt3;Tek;Meis3;Chi3l1;Lingo1;Ntrk2;Il6;Sox9;Tmem100;Ccl3;Ccl2;Rasd2;Igf1
GO:0048002	antigen processing and presentation of peptide antigen	7	49	0.0687653	0.445269	361689;289211;294269;24988;301227;290644;688090	Unc93b1;Fcgr2b;RT1-Da;RT1-M2;Trem2;Ifi30;RT1-Bb
GO:0000725	recombinational repair	7	49	0.0687653	0.445269	289777;500987;363227;497672;298884;499870;313108	Fignl1;H2afx;Nabp1;Brca1;Gen1;Rad51;Mms22l
GO:0045921	positive regulation of exocytosis	7	49	0.0687653	0.445269	26989;24366;24367;25316;59267;81820;65171	Cadps;Fgb;Fgg;Ms4a2;Syt7;Doc2b;Scamp5
GO:0000724	double-strand break repair via homologous recombination	7	49	0.0687653	0.445269	289777;500987;363227;497672;298884;499870;313108	Fignl1;H2afx;Nabp1;Brca1;Gen1;Rad51;Mms22l
GO:0007320	insemination	3	12	0.0687862	0.445269	24807;25553;29366	Tacr1;Slc6a4;Serpine2
GO:0060219	camera-type eye photoreceptor cell differentiation	3	12	0.0687862	0.445269	140586;24832;365901	Sox9;Thy1;Gnat2
GO:0006590	thyroid hormone generation	3	12	0.0687862	0.445269	266807;81819;311374	Duox1;Pax8;Duoxa1
GO:0072109	glomerular mesangium development	3	12	0.0687862	0.445269	24883;117092;84007	Wt1;Serpinb7;C3ar1
GO:0002691	regulation of cellular extravasation	3	12	0.0687862	0.445269	24770;25651;56765	Ccl2;Selp;Plvap
GO:2000757	negative regulation of peptidyl-lysine acetylation	3	12	0.0687862	0.445269	85497;497672;366126	Klf15;Brca1;Spi1
GO:0044030	regulation of DNA methylation	3	12	0.0687862	0.445269	497672;288272;366126	Brca1;Mis18a;Spi1
GO:0006270	DNA replication initiation	3	12	0.0687862	0.445269	29728;308768;291885	Mcm4;Ticrr;Mcm5
GO:0036119	response to platelet-derived growth factor	3	12	0.0687862	0.445269	367166;25694;24770	Hyal1;Has2;Ccl2
GO:0033622	integrin activation	3	12	0.0687862	0.445269	498335;291675;25651	Cxcl13;Mzb1;Selp
GO:0051956	negative regulation of amino acid transport	3	12	0.0687862	0.445269	29290;25569;60582	Adora1;Trh;Il1rn
GO:0051043	regulation of membrane protein ectodomain proteolysis	3	12	0.0687862	0.445269	116510;25728;25083	Timp1;Apoe;Adra2a
GO:0048066	developmental pigmentation	6	39	0.0688249	0.445269	365042;50672;24787;29186;25017;501162	Rab32;Ednrb;Sod2;Cd63;Myo5a;Mreg
GO:0015833	peptide transport	23	232	0.0688982	0.445269	289949;81819;170897;25335;24498;64041;25569;25017;60582;24392;81820;29290;360034;314386;65161;25027;59267;24366;24367;117254;25083;58812;366949	Fam3d;Pax8;Sphk1;Mmp7;Il6;Birc5;Trh;Myo5a;Il1rn;Gja1;Doc2b;Adora1;Myrip;Gpr68;Litaf;Slc16a1;Syt7;Fgb;Fgg;Prdx1;Adra2a;Apln;Mafa
GO:0046879	hormone secretion	23	232	0.0688982	0.445269	289949;81819;59267;64041;25569;25017;60582;24392;353250;81820;29290;360034;314386;289747;24807;29200;25027;24498;24366;24367;25083;58812;366949	Fam3d;Pax8;Syt7;Birc5;Trh;Myo5a;Il1rn;Gja1;Niacr1;Doc2b;Adora1;Myrip;Gpr68;Osm;Tacr1;Inhba;Slc16a1;Il6;Fgb;Fgg;Adra2a;Apln;Mafa
GO:0046942	carboxylic acid transport	22	220	0.0691241	0.445269	29597;25728;25054;293154;25027;25569;24493;80900;24310;84012;50719;60582;83509;29290;113976;24777;298504;29221;310392;114511;50676;171049	P2ry2;Apoe;Ntrk2;Folr2;Slc16a1;Trh;Il1a;Slco1a5;Ace;Slc1a6;Slc7a5;Il1rn;Slc7a7;Adora1;Acsl4;Slc10a1;Mfsd2a;Arg1;Slc7a11;Emb;Slc6a12;Folr1
GO:0048144	fibroblast proliferation	9	70	0.0691651	0.445269	170897;24832;114494;24787;25203;290644;24890;24482;81687	Sphk1;Thy1;Ccna2;Sod2;Ccnb1;Ifi30;Esr1;Igf1;Mmp9
GO:0006090	pyruvate metabolic process	9	70	0.0691651	0.445269	24191;25060;24383;83516;25059;89813;24533;24333;24482	Aldoc;Hk3;Gapdh;Ppargc1a;Hk2;Pdk4;Ldha;Eno1;Igf1
GO:0034765	regulation of ion transmembrane transport	26	269	0.0698179	0.445269	315611;406864;684516;65199;25017;24310;259243;24392;29465;192213;81869;306811;83731;24770;29639;81687;116649;50599;116745;25349;25364;83516;29571;83781;116695;64120	Scn4b;Clic1;Kcnc4;Kcnip3;Myo5a;Ace;Kcnip4;Gja1;Trpv2;Rasgrf1;Gstm7;Wnk2;Kcnma1;Ccl2;Fxyd2;Mmp9;Kcnj4;Kcnj3;Kcnh6;Scn2b;Asic2;Ppargc1a;Scn10a;Lgals3;Kcnd1;Kcnk13
GO:0070665	positive regulation of leukocyte proliferation	11	92	0.0699645	0.445269	64546;353218;56822;24807;25704;24498;679975;29427;24482;25572;309304	Il12b;Tnfsf9;Cd86;Tacr1;Il2ra;Il6;Gpr183;Aif1;Igf1;Tnfrsf4;Pdcd1lg2
GO:0030307	positive regulation of cell growth	11	92	0.0699645	0.445269	25728;170897;29465;680522;79129;81639;367166;83791;24482;81707;113976	Apoe;Sphk1;Trpv2;Hist1h1b;Cyba;Alox15;Hyal1;Fdps;Igf1;Mmp14;Acsl4
GO:0070507	regulation of microtubule cytoskeleton organization	11	92	0.0699645	0.445269	84510;311546;291441;315298;310344;114482;311325;306575;117524;25203;298884	Stmn2;Tpx2;Ska1;Racgap1;Plk4;Nek2;Knstrn;Ckap2;Ccnf;Ccnb1;Gen1
GO:0048660	regulation of smooth muscle cell proliferation	11	92	0.0699645	0.445269	64546;25339;83516;84007;79129;24807;24482;24498;29427;24890;24451	Il12b;Npr3;Ppargc1a;C3ar1;Cyba;Tacr1;Igf1;Il6;Aif1;Esr1;Hmox1
GO:0045807	positive regulation of endocytosis	10	81	0.0699662	0.445269	25350;289211;689388;25544;29186;24770;24773;60350;24232;406161	Sftpd;Fcgr2b;Ptx3;Sele;Cd63;Ccl2;Sftpa1;Cd14;C3;C4b
GO:0043270	positive regulation of ion transport	17	161	0.0707733	0.445269	245920;305236;29597;25728;29465;81503;83567;83781;24832;24770;315611;116637;25542;29290;25569;24493;117258	Cxcl10;Cxcl11;P2ry2;Apoe;Trpv2;Cxcl1;Mchr1;Lgals3;Thy1;Ccl2;Scn4b;Ccl4;Ccl3;Adora1;Trh;Il1a;Cntn1
GO:0002002	regulation of angiotensin levels in blood	2	5	0.0708001	0.445269	54242;100360872	Cpa3;Mcpt1l1
GO:0051488	activation of anaphase-promoting complex activity	2	5	0.0708001	0.445269	64515;25515	Cdc20;Plk1
GO:0050774	negative regulation of dendrite morphogenesis	2	5	0.0708001	0.445269	83620;117038	Cit;Mt3
GO:0010727	negative regulation of hydrogen peroxide metabolic process	2	5	0.0708001	0.445269	24464;100363502	Hp;LOC100363502
GO:0070944	neutrophil mediated killing of bacterium	2	5	0.0708001	0.445269	60665;301229	Cxcl6;Trem1
GO:0070945	neutrophil mediated killing of gram-negative bacterium	2	5	0.0708001	0.445269	60665;301229	Cxcl6;Trem1
GO:0071447	cellular response to hydroperoxide	2	5	0.0708001	0.445269	29427;499204	Aif1;Ddias
GO:2001046	positive regulation of integrin-mediated signaling pathway	2	5	0.0708001	0.445269	361303;29186	Lims2;Cd63
GO:0097070	ductus arteriosus closure	2	5	0.0708001	0.445269	687536;79242	Foxf1;Hpgd
GO:0030321	transepithelial chloride transport	2	5	0.0708001	0.445269	63843;117264	P2ry4;P2ry6
GO:0036005	response to macrophage colony-stimulating factor	2	5	0.0708001	0.445269	24770;81743	Ccl2;Pde2a
GO:0018119	peptidyl-cysteine S-nitrosylation	2	5	0.0708001	0.445269	24383;24599	Gapdh;Nos2
GO:0002693	positive regulation of cellular extravasation	2	5	0.0708001	0.445269	24770;56765	Ccl2;Plvap
GO:2000609	regulation of thyroid hormone generation	2	5	0.0708001	0.445269	81819;311374	Pax8;Duoxa1
GO:1903306	negative regulation of regulated secretory pathway	2	5	0.0708001	0.445269	687536;24451	Foxf1;Hmox1
GO:0071373	cellular response to luteinizing hormone stimulus	2	5	0.0708001	0.445269	25557;25154	Star;Pgr
GO:0072284	metanephric S-shaped body morphogenesis	2	5	0.0708001	0.445269	24883;81819	Wt1;Pax8
GO:0071493	cellular response to UV-B	2	5	0.0708001	0.445269	367166;691657	Hyal1;Crip1
GO:1902571	regulation of serine-type peptidase activity	2	5	0.0708001	0.445269	306283;24648	Anxa8;Serpina1
GO:0070391	response to lipoteichoic acid	2	5	0.0708001	0.445269	60350;301227	Cd14;Trem2
GO:0010216	maintenance of DNA methylation	2	5	0.0708001	0.445269	294071;316129	Hells;Uhrf1
GO:1902572	negative regulation of serine-type peptidase activity	2	5	0.0708001	0.445269	306283;24648	Anxa8;Serpina1
GO:0086067	AV node cell to bundle of His cell communication	2	5	0.0708001	0.445269	29571;315611	Scn10a;Scn4b
GO:0043301	negative regulation of leukocyte degranulation	2	5	0.0708001	0.445269	687536;24451	Foxf1;Hmox1
GO:0003339	regulation of mesenchymal to epithelial transition involved in metanephros morphogenesis	2	5	0.0708001	0.445269	25453;81819	Gdnf;Pax8
GO:0072126	positive regulation of glomerular mesangial cell proliferation	2	5	0.0708001	0.445269	117092;84007	Serpinb7;C3ar1
GO:0031055	chromatin remodeling at centromere	2	5	0.0708001	0.445269	294071;288272	Hells;Mis18a
GO:0010815	bradykinin catabolic process	2	5	0.0708001	0.445269	25425;24310	Ctsh;Ace
GO:0071402	cellular response to lipoprotein particle stimulus	2	5	0.0708001	0.445269	24770;81687	Ccl2;Mmp9
GO:0036006	cellular response to macrophage colony-stimulating factor stimulus	2	5	0.0708001	0.445269	24770;81743	Ccl2;Pde2a
GO:0071223	cellular response to lipoteichoic acid	2	5	0.0708001	0.445269	60350;301227	Cd14;Trem2
GO:0060177	regulation of angiotensin metabolic process	2	5	0.0708001	0.445269	54242;100360872	Cpa3;Mcpt1l1
GO:0017014	protein nitrosylation	2	5	0.0708001	0.445269	24383;24599	Gapdh;Nos2
GO:0071214	cellular response to abiotic stimulus	20	197	0.0717786	0.450859	50676;24773;24392;289777;314386;290326;79129;116649;499870;24212;367166;140586;691657;81743;170913;500987;24482;25364;499204;29393	Slc6a12;Sftpa1;Gja1;Fignl1;Gpr68;Pbk;Cyba;Kcnj4;Rad51;Atp1a2;Hyal1;Sox9;Crip1;Pde2a;Abcb1a;H2afx;Igf1;Asic2;Ddias;Col1a1
GO:0032787	monocarboxylic acid metabolic process	36	395	0.072578	0.45517	25330;25059;58835;50671;24333;497672;83792;246074;24232;25017;59103;316330;114097;170897;286896;24533;24479;24191;58962;25060;287424;89813;311569;170635;140910;25557;24886;24482;113976;24383;83516;79242;171142;296138;50549;81639	Lipe;Hk2;Phgdh;Fasn;Eno1;Brca1;Scd;Scd1;C3;Myo5a;Ptges;Ankrd23;Ltc4s;Sphk1;Sgpl1;Ldha;Idh1;Aldoc;Hpgds;Hk3;Aloxe3;Pdk4;Acss2;Dhrs9;Msmo1;Star;Tbxas1;Igf1;Acsl4;Gapdh;Ppargc1a;Hpgd;Lbp;Acoxl;Cyp4a1;Alox15
GO:0006631	fatty acid metabolic process	25	258	0.072646	0.45517	25330;89813;497672;83792;246074;24232;25017;59103;316330;81639;170897;286896;113976;58962;287424;311569;140910;24886;79242;83516;171142;50671;296138;50549;114097	Lipe;Pdk4;Brca1;Scd;Scd1;C3;Myo5a;Ptges;Ankrd23;Alox15;Sphk1;Sgpl1;Acsl4;Hpgds;Aloxe3;Acss2;Msmo1;Tbxas1;Hpgd;Ppargc1a;Lbp;Fasn;Acoxl;Cyp4a1;Ltc4s
GO:0051726	regulation of cell cycle	50	574	0.0728206	0.455695	300795;171576;304477;289777;117558;54237;245918;117524;497672;25203;680280;308768;360161;24571;64515;24493;170897;315298;310344;296368;291137;29427;291597;289993;64041;64546;684771;360243;315852;311546;289747;114494;314818;29200;25553;360621;363227;24482;25515;83620;404640;79242;311336;296137;499204;24649;140586;309523;64625;298884	Ns5atp9;Bub1b;Kntc1;Fignl1;Mylk2;Cdk1;Cgref1;Ccnf;Brca1;Ccnb1;Gas2l3;Ticrr;Nek6;Muc1;Cdc20;Il1a;Sphk1;Racgap1;Plk4;Ube2c;Gmnn;Aif1;Trim36;Cdkn3;Birc5;Il12b;Cdca5;Top2a;Ttk;Tpx2;Osm;Ccna2;E2f7;Inhba;Slc6a4;Cdc6;Nabp1;Igf1;Plk1;Cit;Mrgprx2;Hpgd;Nusap1;Bub1;Ddias;Pim1;Sox9;Kif20b;Bid;Gen1
GO:2000351	regulation of endothelial cell apoptotic process	5	30	0.0731893	0.455733	25589;24367;89804;24366;58966	Kdr;Fgg;Tek;Fgb;Ramp2
GO:0045429	positive regulation of nitric oxide biosynthetic process	5	30	0.0731893	0.455733	24498;29427;24787;24890;689388	Il6;Aif1;Sod2;Esr1;Ptx3
GO:0051304	chromosome separation	5	30	0.0731893	0.455733	83620;360243;171576;315852;25515	Cit;Top2a;Bub1b;Ttk;Plk1
GO:0048265	response to pain	5	30	0.0731893	0.455733	65199;29244;289747;24807;50672	Kcnip3;Gch1;Osm;Tacr1;Ednrb
GO:0046546	development of primary male sexual characteristics	14	127	0.0737226	0.457918	24883;286896;25589;24950;25453;25557;140586;29637;83791;289054;29200;24890;81707;24310	Wt1;Sgpl1;Kdr;Srd5a1;Gdnf;Star;Sox9;Hmgcs1;Fdps;Aspm;Inhba;Esr1;Mmp14;Ace
GO:0008584	male gonad development	14	127	0.0737226	0.457918	24883;286896;25589;24950;25453;25557;140586;29637;83791;289054;29200;24890;81707;24310	Wt1;Sgpl1;Kdr;Srd5a1;Gdnf;Star;Sox9;Hmgcs1;Fdps;Aspm;Inhba;Esr1;Mmp14;Ace
GO:0006333	chromatin assembly or disassembly	11	93	0.0738797	0.458119	291145;680097;294071;291159;680522;304648;140586;100360950;288242;100912290;288272	Hist1h1a;LOC680097;Hells;Hist1h2ail;Hist1h1b;Asf1b;Sox9;LOC100360950;Chaf1b;LOC100912290;Mis18a
GO:0015849	organic acid transport	22	222	0.0740486	0.458119	29597;25728;25054;293154;25027;25569;24493;80900;24310;84012;50719;60582;83509;29290;113976;24777;298504;29221;310392;114511;50676;171049	P2ry2;Apoe;Ntrk2;Folr2;Slc16a1;Trh;Il1a;Slco1a5;Ace;Slc1a6;Slc7a5;Il1rn;Slc7a7;Adora1;Acsl4;Slc10a1;Mfsd2a;Arg1;Slc7a11;Emb;Slc6a12;Folr1
GO:0042063	gliogenesis	18	174	0.0741605	0.458119	114122;85497;25728;192262;315691;25054;58835;81651;296654;117038;25542;140586;689415;114090;24770;29366;24482;81707	Vcan;Klf15;Apoe;C1s;Lingo1;Ntrk2;Phgdh;Cspg4;Gsn;Mt3;Ccl3;Sox9;Mt2A;Egr2;Ccl2;Serpine2;Igf1;Mmp14
GO:0046677	response to antibiotic	7	50	0.0742178	0.458119	367166;24498;25557;691657;170913;24770;25515	Hyal1;Il6;Star;Crip1;Abcb1a;Ccl2;Plk1
GO:0016525	negative regulation of angiogenesis	7	50	0.0742178	0.458119	245920;89804;287526;360918;292406;24770;363265	Cxcl10;Tek;Serpinf1;Pf4;Thbs2;Ccl2;Col4a3
GO:1902533	positive regulation of intracellular signal transduction	50	575	0.0743515	0.458119	25524;498075;24498;364754;116637;25542;24232;360161;24890;310621;245920;24493;60582;24392;360918;84032;192213;81651;24962;113959;24451;64546;305236;89804;25054;89824;287885;65161;289747;25651;170824;25589;301227;24482;83504;117038;691993;361514;289229;679975;296137;24367;60665;25083;81639;24366;140586;303886;29168;171099	Psap;Trat1;Il6;Fzd8;Ccl4;Ccl3;C3;Nek6;Esr1;Iqgap3;Cxcl10;Il1a;Il1rn;Gja1;Pf4;Col3a1;Rasgrf1;Cspg4;Cth;C5ar1;Hmox1;Il12b;Cxcl11;Tek;Ntrk2;Chi3l1;Sectm1a;Litaf;Osm;Selp;Steap3;Kdr;Trem2;Igf1;Kl;Mt3;Scimp;Meis3;Vangl2;Gpr183;Bub1;Fgg;Cxcl6;Adra2a;Alox15;Fgb;Sox9;Muc20;Ubd;Rasd2
GO:0051222	positive regulation of protein transport	19	186	0.0743931	0.458119	499342;89804;60350;303666;170897;24366;24367;54237;117029;24498;113901;679787;65171;25542;100360977;24493;24482;25572;498840	Cd274;Tek;Cd14;RGD1561778;Sphk1;Fgb;Fgg;Cdk1;Ccr5;Il6;Chia;Clec5a;Scamp5;Ccl3;LOC100360977;Il1a;Igf1;Tnfrsf4;Tmem173
GO:0072273	metanephric nephron morphogenesis	4	21	0.0748481	0.458569	25453;24883;140586;81819	Gdnf;Wt1;Sox9;Pax8
GO:0017085	response to insecticide	4	21	0.0748481	0.458569	83783;25557;25349;25203	Sult1a1;Star;Scn2b;Ccnb1
GO:0032965	regulation of collagen biosynthetic process	4	21	0.0748481	0.458569	24498;24770;113898;117092	Il6;Ccl2;Prdx5;Serpinb7
GO:0032612	interleukin-1 production	6	40	0.0750136	0.458569	170897;691998;25732;117029;25542;25627	Sphk1;Nlrp1b;Acp5;Ccr5;Ccl3;Cma1
GO:0010043	response to zinc ion	6	40	0.0750136	0.458569	25732;24787;691657;689415;25383;29221	Acp5;Sod2;Crip1;Mt2A;Apobec1;Arg1
GO:1901264	carbohydrate derivative transport	6	40	0.0750136	0.458569	29584;25524;24392;63997;170913;29290	Gjb1;Psap;Gja1;Slc29a1;Abcb1a;Adora1
GO:0016485	protein processing	27	284	0.0757574	0.462553	266758;25728;289596;298282;290326;266775;292848;360772;24232;25425;100911545;313339;295703;85266;363265;24237;81707;305253;25308;116510;113936;29366;25515;290757;25083;100363502;64625	Sec11c;Apoe;Corin;Oma1;Pbk;Serpinb10;Klk13;Zfand2a;C3;Ctsh;LOC100911545;Acer2;Serping1;Prss12;Col4a3;C6;Mmp14;Adamts3;Cstb;Timp1;Cpb2;Serpine2;Plk1;F11;Adra2a;LOC100363502;Bid
GO:0040007	growth	59	694	0.0774714	0.472444	170568;25524;292060;170897;299210;65154;54237;296654;24498;24333;84387;246074;367166;24232;24890;295691;25728;24392;29465;680522;79129;310448;24251;499914;63865;24962;29639;84492;171112;81707;29610;64546;116640;155430;289747;117029;24883;304913;64191;25553;29366;289054;24482;113976;117038;289229;50568;286896;25203;245918;50692;81639;64536;140586;29200;689415;25589;29437;83791	Dmbt1;Psap;Irf8;Sphk1;Esrrb;Wisp1;Cdk1;Gsn;Il6;Eno1;Pglyrp1;Scd1;Hyal1;C3;Esr1;Frzb;Apoe;Gja1;Trpv2;Hist1h1b;Cyba;Igsf10;Cd53;Gins1;Lgmn;Cth;Fxyd2;Tec;Wfdc1;Mmp14;Tgfbr3;Il12b;Tnc;Hey2;Osm;Ccr5;Wt1;Tnn;Dhcr7;Slc6a4;Serpine2;Aspm;Igf1;Acsl4;Mt3;Vangl2;Cspg5;Sgpl1;Ccnb1;Cgref1;Plaur;Alox15;Esm1;Sox9;Inhba;Mt2A;Kdr;Acta1;Fdps
GO:0070848	response to growth factor	35	385	0.0775767	0.472513	29597;25350;25728;170897;25054;24950;117038;116640;81682;287129;83504;84032;29610;81743;24770;24773;29393;498335;305253;84510;50592;58966;304334;25557;497979;364648;29186;29221;25694;311827;79242;367166;140586;25589;316521	P2ry2;Sftpd;Apoe;Sphk1;Ntrk2;Srd5a1;Mt3;Tnc;Lum;Tmem204;Kl;Col3a1;Tgfbr3;Pde2a;Ccl2;Sftpa1;Col1a1;Cxcl13;Adamts3;Stmn2;Gria1;Ramp2;Fam20c;Star;Tmem100;Shcbp1;Cd63;Arg1;Has2;Adamtsl2;Hpgd;Hyal1;Sox9;Kdr;Vil1
GO:0006518	peptide metabolic process	11	94	0.077931	0.474096	266758;25728;25335;289596;25425;81869;24787;24962;25627;24479;24310	Sec11c;Apoe;Mmp7;Corin;Ctsh;Gstm7;Sod2;Cth;Cma1;Idh1;Ace
GO:0030099	myeloid cell differentiation	27	285	0.0780344	0.474151	362634;292060;25542;100912290;353218;29610;81743;54264;64546;501854;680097;56822;314386;304334;291100;25732;191575;29200;100360950;299206;361537;366126;287818;29452;360918;679787;29168	C1qc;Irf8;Ccl3;LOC100912290;Tnfsf9;Tgfbr3;Pde2a;Mafb;Il12b;Rab7b;LOC680097;Cd86;Gpr68;Fam20c;Irf4;Acp5;Nme1;Inhba;LOC100360950;Batf;Tyrobp;Spi1;Cd300lf;Epas1;Pf4;Clec5a;Ubd
GO:0032680	regulation of tumor necrosis factor production	9	72	0.0783487	0.474445	64546;360918;25732;117029;171569;116637;25542;24770;60350	Il12b;Pf4;Acp5;Ccr5;Spon2;Ccl4;Ccl3;Ccl2;Cd14
GO:0003014	renal system process	10	83	0.0785102	0.474445	25339;24392;289596;79129;24807;63865;83731;29290;25694;50672	Npr3;Gja1;Corin;Cyba;Tacr1;Lgmn;Kcnma1;Adora1;Has2;Ednrb
GO:0006814	sodium ion transport	16	152	0.0792516	0.474445	24213;81503;29571;84396;365391;24212;315611;25349;306811;287106;29366;25364;29639;117258;24777;317170	Atp1a3;Cxcl1;Scn10a;Atp1b4;Trpm5;Atp1a2;Scn4b;Scn2b;Wnk2;Prss30;Serpine2;Asic2;Fxyd2;Cntn1;Slc10a1;Slc9a7
GO:0043410	positive regulation of MAPK cascade	28	298	0.0793602	0.474445	25524;25054;24498;364754;25542;24232;24493;24890;310621;60582;83504;89804;89824;113959;289747;25589;301227;24482;117038;691993;289229;679975;24366;24367;25083;81639;81651;303886	Psap;Ntrk2;Il6;Fzd8;Ccl3;C3;Il1a;Esr1;Iqgap3;Il1rn;Kl;Tek;Chi3l1;C5ar1;Osm;Kdr;Trem2;Igf1;Mt3;Scimp;Vangl2;Gpr183;Fgb;Fgg;Adra2a;Alox15;Cspg4;Muc20
GO:1901617	organic hydroxy compound biosynthetic process	17	164	0.0797815	0.474445	81726;81639;140868;25017;29244;58949;89784;140910;313339;25557;29637;83791;24848;64191;365345;25427;25728	Mvd;Alox15;Fabp5;Myo5a;Gch1;Ptafr;Idi1;Msmo1;Acer2;Star;Hmgcs1;Fdps;Tph1;Dhcr7;Cyb5r2;Cyp51;Apoe
GO:0032890	regulation of organic acid transport	7	51	0.0799173	0.474445	29597;60582;29221;29290;25569;24493;113976	P2ry2;Il1rn;Arg1;Adora1;Trh;Il1a;Acsl4
GO:0009746	response to hexose	18	176	0.0800427	0.474445	24392;84403;314386;24533;25627;79129;287526;63997;191575;25083;25557;64041;113936;363265;25569;366949;364018;24310	Gja1;Gjb6;Gpr68;Ldha;Cma1;Cyba;Serpinf1;Slc29a1;Nme1;Adra2a;Star;Birc5;Cpb2;Col4a3;Trh;Mafa;Ncf2;Ace
GO:0010288	response to lead ion	5	31	0.0806713	0.474445	24464;25557;29292;100360087;24648	Hp;Star;Ftl1;LOC100360087;Serpina1
GO:0032655	regulation of interleukin-12 production	5	31	0.0806713	0.474445	64546;353218;500590;25732;292060	Il12b;Tnfsf9;Tnfrsf9;Acp5;Irf8
GO:0050853	B cell receptor signaling pathway	5	31	0.0806713	0.474445	293783;685692;304988;84492;317676	Lpxn;Gcsam;Mnda;Tec;Lat2
GO:0002920	regulation of humoral immune response	5	31	0.0806713	0.474445	100911545;295703;289211;24232;24237	LOC100911545;Serping1;Fcgr2b;C3;C6
GO:0033059	cellular pigmentation	5	31	0.0806713	0.474445	266714;365042;501162;25017;29186	Myo7a;Rab32;Mreg;Myo5a;Cd63
GO:0031639	plasminogen activation	3	13	0.0807265	0.474445	113936;290757;29366	Cpb2;F11;Serpine2
GO:0042448	progesterone metabolic process	3	13	0.0807265	0.474445	25557;170635;24950	Star;Dhrs9;Srd5a1
GO:0090382	phagosome maturation	3	13	0.0807265	0.474445	266714;365042;289237	Myo7a;Rab32;Slamf8
GO:0071871	response to epinephrine	3	13	0.0807265	0.474445	25557;83516;24950	Star;Ppargc1a;Srd5a1
GO:0006833	water transport	3	13	0.0807265	0.474445	117558;25694;315190	Mylk2;Has2;Upk3a
GO:1902170	cellular response to reactive nitrogen species	3	13	0.0807265	0.474445	117038;24773;83516	Mt3;Sftpa1;Ppargc1a
GO:0070255	regulation of mucus secretion	3	13	0.0807265	0.474445	29290;79129;29597	Adora1;Cyba;P2ry2
GO:0045986	negative regulation of smooth muscle contraction	3	13	0.0807265	0.474445	29290;25083;83731	Adora1;Adra2a;Kcnma1
GO:0071168	protein localization to chromatin	3	13	0.0807265	0.474445	680522;684771;25515	Hist1h1b;Cdca5;Plk1
GO:0036035	osteoclast development	3	13	0.0807265	0.474445	361537;304334;314386	Tyrobp;Fam20c;Gpr68
GO:0050755	chemokine metabolic process	3	13	0.0807265	0.474445	24498;25557;301229	Il6;Star;Trem1
GO:1901984	negative regulation of protein acetylation	3	13	0.0807265	0.474445	85497;497672;366126	Klf15;Brca1;Spi1
GO:0007080	mitotic metaphase plate congression	3	13	0.0807265	0.474445	684771;25203;500545	Cdca5;Ccnb1;Cdca8
GO:0006925	inflammatory cell apoptotic process	3	13	0.0807265	0.474445	24498;353250;117029	Il6;Niacr1;Ccr5
GO:0010824	regulation of centrosome duplication	3	13	0.0807265	0.474445	117524;310344;298884	Ccnf;Plk4;Gen1
GO:0032878	regulation of establishment or maintenance of cell polarity	3	13	0.0807265	0.474445	89804;309523;24482	Tek;Kif20b;Igf1
GO:0036296	response to increased oxygen levels	6	41	0.0815075	0.476804	25350;24787;24773;81687;364018;29393	Sftpd;Sod2;Sftpa1;Mmp9;Ncf2;Col1a1
GO:0043299	leukocyte degranulation	6	41	0.0815075	0.476804	317676;687536;25316;81511;25542;24451	Lat2;Foxf1;Ms4a2;Lat;Ccl3;Hmox1
GO:0055093	response to hyperoxia	6	41	0.0815075	0.476804	25350;24787;24773;81687;364018;29393	Sftpd;Sod2;Sftpa1;Mmp9;Ncf2;Col1a1
GO:0014855	striated muscle cell proliferation	6	41	0.0815075	0.476804	24392;155430;24834;54237;25203;29610	Gja1;Hey2;Tk1;Cdk1;Ccnb1;Tgfbr3
GO:0048659	smooth muscle cell proliferation	11	95	0.0821187	0.479821	64546;25339;83516;84007;79129;24807;24482;24498;29427;24890;24451	Il12b;Npr3;Ppargc1a;C3ar1;Cyba;Tacr1;Igf1;Il6;Aif1;Esr1;Hmox1
GO:0042102	positive regulation of T cell proliferation	8	62	0.0823527	0.480342	64546;353218;56822;25704;24498;29427;24482;309304	Il12b;Tnfsf9;Cd86;Il2ra;Il6;Aif1;Igf1;Pdcd1lg2
GO:0031638	zymogen activation	10	84	0.0830132	0.480342	290757;313339;113936;100363502;29366;85266;363265;64625;81707;25425	F11;Acer2;Cpb2;LOC100363502;Serpine2;Prss12;Col4a3;Bid;Mmp14;Ctsh
GO:0007601	visual perception	10	84	0.0830132	0.480342	302516;64348;25654;29452;29695;266714;81682;25017;365901;29393	Nyx;Cryba4;Col11a1;Epas1;Gabrr2;Myo7a;Lum;Myo5a;Gnat2;Col1a1
GO:0001558	regulation of cell growth	24	250	0.0830939	0.480342	367166;25728;170897;65154;117038;24333;83791;295691;29465;680522;79129;24962;29639;171112;81707;117029;24883;29200;29366;24482;113976;245918;81639;64536	Hyal1;Apoe;Sphk1;Wisp1;Mt3;Eno1;Fdps;Frzb;Trpv2;Hist1h1b;Cyba;Cth;Fxyd2;Wfdc1;Mmp14;Ccr5;Wt1;Inhba;Serpine2;Igf1;Acsl4;Cgref1;Alox15;Esm1
GO:0050921	positive regulation of chemotaxis	9	73	0.0832053	0.480342	498335;245920;84007;287561;24770;116637;25542;25589;29427	Cxcl13;Cxcl10;C3ar1;Ccl7;Ccl2;Ccl4;Ccl3;Kdr;Aif1
GO:0002218	activation of innate immune response	9	73	0.0832053	0.480342	501854;361689;56822;305355;291100;58949;84387;499926;498840	Rab7b;Unc93b1;Cd86;Tlr10;Irf4;Ptafr;Pglyrp1;Bpifb1;Tmem173
GO:1903036	positive regulation of response to wounding	9	73	0.0832053	0.480342	305355;117029;25083;24498;81743;25542;24232;50654;24310	Tlr10;Ccr5;Adra2a;Il6;Pde2a;Ccl3;C3;Ctss;Ace
GO:0006720	isoprenoid metabolic process	9	73	0.0832053	0.480342	81726;25154;25086;170635;89784;24950;25557;29637;83791	Mvd;Pgr;Cyp2e1;Dhrs9;Idi1;Srd5a1;Star;Hmgcs1;Fdps
GO:0032640	tumor necrosis factor production	9	73	0.0832053	0.480342	64546;360918;25732;117029;171569;116637;25542;24770;60350	Il12b;Pf4;Acp5;Ccr5;Spon2;Ccl4;Ccl3;Ccl2;Cd14
GO:0035812	renal sodium excretion	4	22	0.0841196	0.480342	29290;24807;50672;289596	Adora1;Tacr1;Ednrb;Corin
GO:0051303	establishment of chromosome localization	4	22	0.0841196	0.480342	64041;684771;25203;500545	Birc5;Cdca5;Ccnb1;Cdca8
GO:0071869	response to catecholamine	4	22	0.0841196	0.480342	25557;60582;24950;83516	Star;Il1rn;Srd5a1;Ppargc1a
GO:0071867	response to monoamine	4	22	0.0841196	0.480342	25557;60582;24950;83516	Star;Il1rn;Srd5a1;Ppargc1a
GO:0015893	drug transport	4	22	0.0841196	0.480342	360539;24891;24904;170913	Slc47a1;Abcb4;Slc22a1;Abcb1a
GO:0043949	regulation of cAMP-mediated signaling	4	22	0.0841196	0.480342	245920;305236;171099;360918	Cxcl10;Cxcl11;Rasd2;Pf4
GO:0035813	regulation of renal sodium excretion	4	22	0.0841196	0.480342	29290;24807;50672;289596	Adora1;Tacr1;Ednrb;Corin
GO:0002544	chronic inflammatory response	4	22	0.0841196	0.480342	24614;60582;59103;24392	Orm1;Il1rn;Ptges;Gja1
GO:0071295	cellular response to vitamin	4	22	0.0841196	0.480342	114097;24599;116640;29393	Ltc4s;Nos2;Tnc;Col1a1
GO:0033197	response to vitamin E	4	22	0.0841196	0.480342	29221;24614;29637;29393	Arg1;Orm1;Hmgcs1;Col1a1
GO:0043618	regulation of transcription from RNA polymerase II promoter in response to stress	4	22	0.0841196	0.480342	117038;24451;24571;29452	Mt3;Hmox1;Muc1;Epas1
GO:0015718	monocarboxylic acid transport	12	107	0.0847754	0.483537	50676;25728;29597;114511;298504;24310;25027;25569;24493;80900;24777;113976	Slc6a12;Apoe;P2ry2;Emb;Mfsd2a;Ace;Slc16a1;Trh;Il1a;Slco1a5;Slc10a1;Acsl4
GO:0090068	positive regulation of cell cycle process	15	142	0.0852821	0.485552	404640;311336;315298;310344;296368;314818;64041;497672;298884;360621;29427;24493;24482;24571;25515	Mrgprx2;Nusap1;Racgap1;Plk4;Ube2c;E2f7;Birc5;Brca1;Gen1;Cdc6;Aif1;Il1a;Igf1;Muc1;Plk1
GO:0030162	regulation of proteolysis	39	440	0.0856261	0.485552	25728;290326;266775;64625;24498;360772;64041;24232;25425;306283;100911545;117092;29569;24648;291091;24795;313339;295703;363265;113898;171112;81707;296257;25308;360228;116510;29366;24482;25515;117038;83928;306251;287526;25083;288001;100363502;316521;684050;406161	Apoe;Pbk;Serpinb10;Bid;Il6;Zfand2a;Birc5;C3;Ctsh;Anxa8;LOC100911545;Serpinb7;Pcolce;Serpina1;Serpinb1a;Serpina3n;Acer2;Serping1;Col4a3;Prdx5;Wfdc1;Mmp14;Cst7;Cstb;Wfdc21;Timp1;Serpine2;Igf1;Plk1;Mt3;Fetub;Itih1;Serpinf1;Adra2a;Kng1l1;LOC100363502;Vil1;PCOLCE2;C4b
GO:0006672	ceramide metabolic process	7	52	0.0858627	0.485552	287424;286896;362800;314360;313339;282838;314438	Aloxe3;Sgpl1;Itgb8;Galc;Acer2;Gm2a;Degs2
GO:0044702	single organism reproductive process	71	858	0.0862906	0.485552	29597;64557;25524;498997;25154;299210;24834;56777;24950;60566;29452;364754;117524;25448;83791;170913;192129;24493;24890;304608;295691;81687;360711;155430;25553;286896;315298;310344;29637;25033;24770;24310;81707;24479;291145;116640;691857;500987;291597;116510;24807;25453;25557;29200;691657;299106;84397;29366;289054;29221;24482;113976;83620;24883;314818;83928;50672;292206;50549;79242;287526;499204;…	P2ry2;Bard1;Psap;Rspo3;Pgr;Esrrb;Tk1;Adam1a;Srd5a1;Syt8;Epas1;Fzd8;Ccnf;Cenpi;Fdps;Abcb1a;Vmp1;Il1a;Esr1;Mmp19;Frzb;Mmp9;RGD1310335;Hey2;Slc6a4;Sgpl1;Racgap1;Plk4;Hmgcs1;Sstr1;Ccl2;Ace;Mmp14;Idh1;Hist1h1a;Tnc;Pygo1;H2afx;Trim36;Timp1;Tacr1;Gdnf;Star;Inhba;Crip1;Rpl10l;Tnfaip6;Serpine2;Aspm;Arg1;Igf1;Acsl4;Cit;Wt1;E2f7;Fetub;Ednrb;Trip13;Cyp4a1;Hpgd;Serpinf1;Ddias;Plaur;Hp;Sox9;Grn;Tmsb10;Kdr;T;Ct…
GO:1901615	organic hydroxy compound metabolic process	33	364	0.0864928	0.485552	25330;81819;25728;170897;140868;24950;362619;117038;83791;365345;25427;29230;81726;24533;25017;313339;29637;24848;83731;58949;140910;25557;64191;311374;83783;29244;266807;89784;81639;79223;314438;294422;29452	Lipe;Pax8;Apoe;Sphk1;Fabp5;Srd5a1;Smpdl3b;Mt3;Fdps;Cyb5r2;Cyp51;Sqle;Mvd;Ldha;Myo5a;Acer2;Hmgcs1;Tph1;Kcnma1;Ptafr;Msmo1;Star;Dhcr7;Duoxa1;Sult1a1;Gch1;Duox1;Idi1;Alox15;Gk;Degs2;Smpdl3a;Epas1
GO:0051129	negative regulation of cellular component organization	34	377	0.0871852	0.485552	25350;25728;298282;24832;114482;117038;117524;297339;25203;245920;50665;289211;192211;29610;81707;361244;84510;155430;289747;117029;25383;298884;24482;25515;83620;24171;366126;83781;296654;306575;81651;497672;65171;316521	Sftpd;Apoe;Oma1;Thy1;Nek2;Mt3;Ccnf;Capg;Ccnb1;Cxcl10;Tmsb10;Fcgr2b;Prom2;Tgfbr3;Mmp14;RGD1307443;Stmn2;Hey2;Osm;Ccr5;Apobec1;Gen1;Igf1;Plk1;Cit;Add2;Spi1;Lgals3;Gsn;Ckap2;Cspg4;Brca1;Scamp5;Vil1
GO:0060627	regulation of vesicle-mediated transport	25	264	0.0873322	0.485552	25350;25316;59267;25544;24232;25017;26989;289211;192211;81820;24770;24773;24451;687536;689388;29186;60350;24366;24367;83781;25083;81639;65171;65178;406161	Sftpd;Ms4a2;Syt7;Sele;C3;Myo5a;Cadps;Fcgr2b;Prom2;Doc2b;Ccl2;Sftpa1;Hmox1;Foxf1;Ptx3;Cd63;Cd14;Fgb;Fgg;Lgals3;Adra2a;Alox15;Scamp5;Snap91;C4b
GO:0000910	cytokinesis	8	63	0.0878125	0.485552	294074;404640;311336;315298;306575;314818;360621;25515	Cep55;Mrgprx2;Nusap1;Racgap1;Ckap2;E2f7;Cdc6;Plk1
GO:0060341	regulation of cellular localization	65	780	0.0881291	0.485552	499342;64557;289949;81819;170897;500590;54237;25316;58812;24498;113901;64041;25203;25542;315215;25569;24493;25017;245920;306071;60582;24392;353250;79129;315298;311325;81869;684516;81820;81743;305355;29290;24451;687536;498840;360034;305236;89804;684771;303666;314386;24832;65161;289747;24807;117029;117558;29200;301227;114482;100360977;25027;60350;24482;25572;26989;117254;25054;59267;24367;25083;243…	Cd274;Bard1;Fam3d;Pax8;Sphk1;Tnfrsf9;Cdk1;Ms4a2;Apln;Il6;Chia;Birc5;Ccnb1;Ccl3;Mlc1;Trh;Il1a;Myo5a;Cxcl10;Lcp1;Il1rn;Gja1;Niacr1;Cyba;Racgap1;Knstrn;Gstm7;Kcnc4;Doc2b;Pde2a;Tlr10;Adora1;Hmox1;Foxf1;Tmem173;Myrip;Cxcl11;Tek;Cdca5;RGD1561778;Gpr68;Thy1;Litaf;Osm;Tacr1;Ccr5;Mylk2;Inhba;Trem2;Nek2;LOC100360977;Slc16a1;Cd14;Igf1;Tnfrsf4;Cadps;Prdx1;Ntrk2;Syt7;Fgg;Adra2a;Fgb;Cpb2;Clec5a;Scamp5
GO:0071706	tumor necrosis factor superfamily cytokine production	9	74	0.0882385	0.485552	64546;360918;25732;117029;171569;116637;25542;24770;60350	Il12b;Pf4;Acp5;Ccr5;Spon2;Ccl4;Ccl3;Ccl2;Cd14
GO:0045638	negative regulation of myeloid cell differentiation	9	74	0.0882385	0.485552	680097;314386;191575;360918;100360950;25542;362634;54264;100912290	LOC680097;Gpr68;Nme1;Pf4;LOC100360950;Ccl3;C1qc;Mafb;LOC100912290
GO:0007585	respiratory gaseous exchange	6	42	0.0883038	0.485552	25350;24212;58812;29290;24773;54264	Sftpd;Atp1a2;Apln;Adora1;Sftpa1;Mafb
GO:0003044	regulation of systemic arterial blood pressure mediated by a chemical signal	6	42	0.0883038	0.485552	289596;79129;24807;54242;24787;100360872	Corin;Cyba;Tacr1;Cpa3;Sod2;Mcpt1l1
GO:0071312	cellular response to alkaloid	5	32	0.0885435	0.485552	25557;81869;499870;29427;170913	Star;Gstm7;Rad51;Aif1;Abcb1a
GO:0051924	regulation of calcium ion transport	16	155	0.0893405	0.485552	245920;305236;24392;29465;83567;83781;79129;24832;25316;81869;116637;25542;24770;25017;24482;24310	Cxcl10;Cxcl11;Gja1;Trpv2;Mchr1;Lgals3;Cyba;Thy1;Ms4a2;Gstm7;Ccl4;Ccl3;Ccl2;Myo5a;Igf1;Ace
GO:0080134	regulation of response to stress	58	689	0.0898496	0.485552	25524;361689;289777;50654;290326;25704;117254;364754;60665;497672;25732;84387;25542;315215;24232;24493;58949;24571;24237;100911545;60582;24392;289211;316842;25728;295703;81743;29290;24310;84492;498840;64546;501854;291100;56822;500707;305355;687536;25651;117029;170824;113936;29366;25364;311374;24498;691992;50672;289229;287526;290757;25083;24464;24787;499926;316521;499870;287877	Psap;Unc93b1;Fignl1;Ctss;Pbk;Il2ra;Prdx1;Fzd8;Cxcl6;Brca1;Acp5;Pglyrp1;Ccl3;Mlc1;C3;Il1a;Ptafr;Muc1;C6;LOC100911545;Il1rn;Gja1;Fcgr2b;Metrnl;Apoe;Serping1;Pde2a;Adora1;Ace;Tec;Tmem173;Il12b;Rab7b;Irf4;Cd86;Tc2n;Tlr10;Foxf1;Selp;Ccr5;Steap3;Cpb2;Serpine2;Asic2;Duoxa1;Il6;Gp1ba;Ednrb;Vangl2;Serpinf1;F11;Adra2a;Hp;Sod2;Bpifb1;Vil1;Rad51;Pycr1
GO:0006032	chitin catabolic process	2	6	0.0904418	0.485552	89824;113901	Chi3l1;Chia
GO:0051574	positive regulation of histone H3-K9 methylation	2	6	0.0904418	0.485552	680522;497672	Hist1h1b;Brca1
GO:0010041	response to iron(III) ion	2	6	0.0904418	0.485552	25203;81687	Ccnb1;Mmp9
GO:1900746	regulation of vascular endothelial growth factor signaling pathway	2	6	0.0904418	0.485552	305253;29186	Adamts3;Cd63
GO:2001198	regulation of dendritic cell differentiation	2	6	0.0904418	0.485552	297077;171411	Tmem176a;Tmem176b
GO:0010046	response to mycotoxin	2	6	0.0904418	0.485552	170496;170913	Lcn2;Abcb1a
GO:0071474	cellular hyperosmotic response	2	6	0.0904418	0.485552	50676;170913	Slc6a12;Abcb1a
GO:0060029	convergent extension involved in organogenesis	2	6	0.0904418	0.485552	289229;295691	Vangl2;Frzb
GO:0042670	retinal cone cell differentiation	2	6	0.0904418	0.485552	24832;365901	Thy1;Gnat2
GO:0042908	xenobiotic transport	2	6	0.0904418	0.485552	24778;24891	Slc2a1;Abcb4
GO:0034375	high-density lipoprotein particle remodeling	2	6	0.0904418	0.485552	291437;25728	Lipg;Apoe
GO:0046549	retinal cone cell development	2	6	0.0904418	0.485552	24832;365901	Thy1;Gnat2
GO:0001957	intramembranous ossification	2	6	0.0904418	0.485552	29175;29393	Ctsk;Col1a1
GO:0036376	sodium ion export from cell	2	6	0.0904418	0.485552	24212;24213	Atp1a2;Atp1a3
GO:0060421	positive regulation of heart growth	2	6	0.0904418	0.485552	24883;83791	Wt1;Fdps
GO:0001839	neural plate morphogenesis	2	6	0.0904418	0.485552	292301;289229	T;Vangl2
GO:0036072	direct ossification	2	6	0.0904418	0.485552	29175;29393	Ctsk;Col1a1
GO:0045988	negative regulation of striated muscle contraction	2	6	0.0904418	0.485552	24212;29290	Atp1a2;Adora1
GO:2000020	positive regulation of male gonad development	2	6	0.0904418	0.485552	24883;140586	Wt1;Sox9
GO:0002439	chronic inflammatory response to antigenic stimulus	2	6	0.0904418	0.485552	24614;60582	Orm1;Il1rn
GO:0071415	cellular response to purine-containing compound	2	6	0.0904418	0.485552	29597;81869	P2ry2;Gstm7
GO:2001199	negative regulation of dendritic cell differentiation	2	6	0.0904418	0.485552	297077;171411	Tmem176a;Tmem176b
GO:0001778	plasma membrane repair	2	6	0.0904418	0.485552	59267;365377	Syt7;Trim72
GO:0006030	chitin metabolic process	2	6	0.0904418	0.485552	89824;113901	Chi3l1;Chia
GO:0070942	neutrophil mediated cytotoxicity	2	6	0.0904418	0.485552	60665;301229	Cxcl6;Trem1
GO:0051024	positive regulation of immunoglobulin secretion	2	6	0.0904418	0.485552	24498;25572	Il6;Tnfrsf4
GO:0060526	prostate glandular acinus morphogenesis	2	6	0.0904418	0.485552	24890;24482	Esr1;Igf1
GO:0060527	prostate epithelial cord arborization involved in prostate glandular acinus morphogenesis	2	6	0.0904418	0.485552	24890;24482	Esr1;Igf1
GO:0060745	mammary gland branching involved in pregnancy	2	6	0.0904418	0.485552	24890;25154	Esr1;Pgr
GO:0070943	neutrophil mediated killing of symbiont cell	2	6	0.0904418	0.485552	60665;301229	Cxcl6;Trem1
GO:0000212	meiotic spindle organization	2	6	0.0904418	0.485552	289054;315330	Aspm;Espl1
GO:0042129	regulation of T cell proliferation	11	97	0.0909048	0.485552	64546;499342;353218;25350;56822;83781;25704;24498;29427;24482;309304	Il12b;Cd274;Tnfsf9;Sftpd;Cd86;Lgals3;Il2ra;Il6;Aif1;Igf1;Pdcd1lg2
GO:0034220	ion transmembrane transport	58	690	0.091477	0.485552	293650;406864;170899;192213;29440;117596;29599;684516;24213;65199;25364;25017;81687;84012;50719;259243;24392;29465;29695;362861;100909725;315611;306811;24904;83731;24770;29639;24310;360539;63848;50592;191573;60338;116649;50599;116745;25349;83509;297932;317170;25027;685232;365391;310392;114511;306009;24212;25753;83516;314847;29571;83781;288026;81869;116695;64120;116831;81658	Tcirg1;Clic1;Kcnk2;Rasgrf1;Slc26a4;Atp6v1b2;Atp2b3;Kcnc4;Atp1a3;Kcnip3;Asic2;Myo5a;Mmp9;Slc1a6;Slc7a5;Kcnip4;Gja1;Trpv2;Gabrr2;Slc41a2;LOC100909725;Scn4b;Wnk2;Slc22a1;Kcnma1;Ccl2;Fxyd2;Ace;Slc47a1;Fxyd7;Gria1;Grin3a;Fxyd5;Kcnj4;Kcnj3;Kcnh6;Scn2b;Slc7a7;Atp6v0d2;Slc9a7;Slc16a1;Atp6v1a;Trpm5;Slc7a11;Emb;Slc39a14;Atp1a2;Chrng;Ppargc1a;Best3;Scn10a;Lgals3;Atp13a4;Gstm7;Kcnd1;Kcnk13;Fxyd3;Gabrp
GO:0006260	DNA replication	20	204	0.0917338	0.485552	288079;300795;24482;360243;286894;291885;29728;24834;54237;499914;25083;24498;314818;362720;497672;307126;308768;499870;313108;291137	Polq;Ns5atp9;Igf1;Top2a;Parm1;Mcm5;Mcm4;Tk1;Cdk1;Gins1;Adra2a;Il6;E2f7;Rrm2;Brca1;Mcm10;Ticrr;Rad51;Mms22l;Gmnn
GO:0006809	nitric oxide biosynthetic process	7	53	0.0920526	0.485552	689388;24599;25732;24498;24787;29427;24890	Ptx3;Nos2;Acp5;Il6;Sod2;Aif1;Esr1
GO:0060419	heart growth	7	53	0.0920526	0.485552	24392;155430;54237;29610;24883;25203;83791	Gja1;Hey2;Cdk1;Tgfbr3;Wt1;Ccnb1;Fdps
GO:0002286	T cell activation involved in immune response	7	53	0.0920526	0.485552	64546;306071;56822;83781;291100;24498;299206	Il12b;Lcp1;Cd86;Lgals3;Irf4;Il6;Batf
GO:1901879	regulation of protein depolymerization	7	53	0.0920526	0.485552	24171;84510;306575;296654;297339;25203;316521	Add2;Stmn2;Ckap2;Gsn;Capg;Ccnb1;Vil1
GO:0007162	negative regulation of cell adhesion	10	86	0.0924824	0.485552	116640;293783;25732;363060;313339;315615;29366;60582;81707;29393	Tnc;Lpxn;Acp5;Plet1;Acer2;Dscaml1;Serpine2;Il1rn;Mmp14;Col1a1
GO:0032102	negative regulation of response to external stimulus	16	156	0.0928769	0.485552	498335;64546;24770;24392;289211;191573;287526;290326;687536;25732;25704;316842;84387;29427;29290;25728	Cxcl13;Il12b;Ccl2;Gja1;Fcgr2b;Grin3a;Serpinf1;Pbk;Foxf1;Acp5;Il2ra;Metrnl;Pglyrp1;Aif1;Adora1;Apoe
GO:1901990	regulation of mitotic cell cycle phase transition	17	168	0.0929126	0.485552	363227;360243;304477;296137;54237;298884;315852;114494;314818;25203;360621;29427;308768;360161;64625;24571;25515	Nabp1;Top2a;Kntc1;Bub1;Cdk1;Gen1;Ttk;Ccna2;E2f7;Ccnb1;Cdc6;Aif1;Ticrr;Nek6;Bid;Muc1;Plk1
GO:0003012	muscle system process	22	229	0.0931307	0.485552	85497;170897;24212;83791;79129;315611;83731;29427;25753;365377;155430;140939;117558;24807;25453;25349;29290;24482;50672;29571;25083;29437	Klf15;Sphk1;Atp1a2;Fdps;Cyba;Scn4b;Kcnma1;Aif1;Chrng;Trim72;Hey2;Trim63;Mylk2;Tacr1;Gdnf;Scn2b;Adora1;Igf1;Ednrb;Scn10a;Adra2a;Acta1
GO:0050866	negative regulation of cell activation	12	109	0.0931997	0.485552	499342;25350;25728;289211;83781;687536;25704;304988;84387;29366;24451;309304	Cd274;Sftpd;Apoe;Fcgr2b;Lgals3;Foxf1;Il2ra;Mnda;Pglyrp1;Serpine2;Hmox1;Pdcd1lg2
GO:0022414	reproductive process	78	956	0.0933637	0.485552	29597;25330;25524;498997;25154;299210;24834;56777;64557;60566;29452;364754;117524;25448;83791;170913;192129;24493;24890;304608;295691;81687;60582;170897;25553;286896;289596;315298;310344;155430;25033;29637;24571;24770;24310;81707;24479;291145;116640;58966;691857;500987;291597;116510;24807;24950;25453;25557;29200;691657;299106;84397;29366;289054;29221;24482;113976;83620;24883;314818;83928;360711;5…	P2ry2;Lipe;Psap;Rspo3;Pgr;Esrrb;Tk1;Adam1a;Bard1;Syt8;Epas1;Fzd8;Ccnf;Cenpi;Fdps;Abcb1a;Vmp1;Il1a;Esr1;Mmp19;Frzb;Mmp9;Il1rn;Sphk1;Slc6a4;Sgpl1;Corin;Racgap1;Plk4;Hey2;Sstr1;Hmgcs1;Muc1;Ccl2;Ace;Mmp14;Idh1;Hist1h1a;Tnc;Ramp2;Pygo1;H2afx;Trim36;Timp1;Tacr1;Srd5a1;Gdnf;Star;Inhba;Crip1;Rpl10l;Tnfaip6;Serpine2;Aspm;Arg1;Igf1;Acsl4;Cit;Wt1;E2f7;Fetub;RGD1310335;Ednrb;Trip13;Cyp4a1;Hpgd;Serpinf1;Ddias…
GO:0051209	release of sequestered calcium ion into cytosol	9	75	0.0934479	0.485552	245920;305236;301086;79129;24832;117029;81869;25316;25542	Cxcl10;Cxcl11;Xcr1;Cyba;Thy1;Ccr5;Gstm7;Ms4a2;Ccl3
GO:2001237	negative regulation of extrinsic apoptotic signaling pathway	9	75	0.0934479	0.485552	24366;24367;83781;24482;25453;497672;360918;24451;25572	Fgb;Fgg;Lgals3;Igf1;Gdnf;Brca1;Pf4;Hmox1;Tnfrsf4
GO:0051283	negative regulation of sequestering of calcium ion	9	75	0.0934479	0.485552	245920;305236;301086;79129;24832;117029;81869;25316;25542	Cxcl10;Cxcl11;Xcr1;Cyba;Thy1;Ccr5;Gstm7;Ms4a2;Ccl3
GO:0006641	triglyceride metabolic process	8	64	0.0934773	0.485552	499264;25330;25728;25086;79223;24232;24890;113976	Apobr;Lipe;Apoe;Cyp2e1;Gk;C3;Esr1;Acsl4
GO:0055072	iron ion homeostasis	8	64	0.0934773	0.485552	29292;100360087;29452;170824;24787;100362384;170496;24451	Ftl1;LOC100360087;Epas1;Steap3;Sod2;LOC100362384;Lcn2;Hmox1
GO:0070254	mucus secretion	3	14	0.093489	0.485552	29290;79129;29597	Adora1;Cyba;P2ry2
GO:0085029	extracellular matrix assembly	3	14	0.093489	0.485552	140586;64057;25694	Sox9;Hapln2;Has2
GO:0051818	disruption of cells of other organism involved in symbiotic interaction	3	14	0.093489	0.485552	60665;301229;117029	Cxcl6;Trem1;Ccr5
GO:0072077	renal vesicle morphogenesis	3	14	0.093489	0.485552	25453;140586;81819	Gdnf;Sox9;Pax8
GO:0051883	killing of cells in other organism involved in symbiotic interaction	3	14	0.093489	0.485552	60665;301229;117029	Cxcl6;Trem1;Ccr5
GO:0040001	establishment of mitotic spindle localization	3	14	0.093489	0.485552	311336;298850;301701	Nusap1;Cenpa;Ndc80
GO:0090280	positive regulation of calcium ion import	3	14	0.093489	0.485552	24770;83781;29465	Ccl2;Lgals3;Trpv2
GO:0060231	mesenchymal to epithelial transition	3	14	0.093489	0.485552	25453;24883;81819	Gdnf;Wt1;Pax8
GO:0001553	luteinization	3	14	0.093489	0.485552	29200;25154;286896	Inhba;Pgr;Sgpl1
GO:0014850	response to muscle activity	3	14	0.093489	0.485552	316842;83516;24950	Metrnl;Ppargc1a;Srd5a1
GO:0015695	organic cation transport	3	14	0.093489	0.485552	360539;24904;170913	Slc47a1;Slc22a1;Abcb1a
GO:0060992	response to fungicide	3	14	0.093489	0.485552	25557;50592;24950	Star;Gria1;Srd5a1
GO:0060142	regulation of syncytium formation by plasma membrane fusion	3	14	0.093489	0.485552	245920;29455;24251	Cxcl10;Gdf15;Cd53
GO:0009635	response to herbicide	3	14	0.093489	0.485552	25557;170496;29221	Star;Lcn2;Arg1
GO:0015732	prostaglandin transport	3	14	0.093489	0.485552	29597;24493;113976	P2ry2;Il1a;Acsl4
GO:0043950	positive regulation of cAMP-mediated signaling	3	14	0.093489	0.485552	245920;305236;360918	Cxcl10;Cxcl11;Pf4
GO:0070997	neuron death	24	254	0.0938425	0.485552	25728;25054;24498;64041;65199;25542;24890;364018;117232;63865;24770;24451;113959;117029;25453;25557;24787;114105;24482;117038;24383;83516;287526;25589	Apoe;Ntrk2;Il6;Birc5;Kcnip3;Ccl3;Esr1;Ncf2;Barhl1;Lgmn;Ccl2;Hmox1;C5ar1;Ccr5;Gdnf;Star;Sod2;Cxcl2;Igf1;Mt3;Gapdh;Ppargc1a;Serpinf1;Kdr
GO:0050999	regulation of nitric-oxide synthase activity	4	23	0.0939218	0.485552	29244;25339;24890;25728	Gch1;Npr3;Esr1;Apoe
GO:1902883	negative regulation of response to oxidative stress	4	23	0.0939218	0.485552	24464;24787;25524;287877	Hp;Sod2;Psap;Pycr1
GO:1901533	negative regulation of hematopoietic progenitor cell differentiation	4	23	0.0939218	0.485552	100360950;680097;100912290;360918	LOC100360950;LOC680097;LOC100912290;Pf4
GO:0014888	striated muscle adaptation	4	23	0.0939218	0.485552	85497;140939;29437;155430	Klf15;Trim63;Acta1;Hey2
GO:0034381	plasma lipoprotein particle clearance	4	23	0.0939218	0.485552	291437;498638;300027;25728	Lipg;Msr1;Gpihbp1;Apoe
GO:0071174	mitotic spindle checkpoint	4	23	0.0939218	0.485552	296137;298884;25203;25515	Bub1;Gen1;Ccnb1;Plk1
GO:1902042	negative regulation of extrinsic apoptotic signaling pathway via death domain receptors	4	23	0.0939218	0.485552	24366;24367;497672;24451	Fgb;Fgg;Brca1;Hmox1
GO:1900408	negative regulation of cellular response to oxidative stress	4	23	0.0939218	0.485552	24464;24787;25524;287877	Hp;Sod2;Psap;Pycr1
GO:0050000	chromosome localization	4	23	0.0939218	0.485552	64041;684771;25203;500545	Birc5;Cdca5;Ccnb1;Cdca8
GO:0016049	cell growth	29	317	0.0948423	0.489664	367166;25728;170897;65154;24498;24333;83791;295691;29465;680522;79129;29610;24962;29639;171112;81707;117029;24883;304913;29366;24482;113976;117038;245918;81639;64536;140586;29200;29437	Hyal1;Apoe;Sphk1;Wisp1;Il6;Eno1;Fdps;Frzb;Trpv2;Hist1h1b;Cyba;Tgfbr3;Cth;Fxyd2;Wfdc1;Mmp14;Ccr5;Wt1;Tnn;Serpine2;Igf1;Acsl4;Mt3;Cgref1;Alox15;Esm1;Sox9;Inhba;Acta1
GO:0010657	muscle cell apoptotic process	6	43	0.0953992	0.489664	64546;155430;308099;24482;81680;24451	Il12b;Hey2;Fndc1;Igf1;Lifr;Hmox1
GO:0006940	regulation of smooth muscle contraction	6	43	0.0953992	0.489664	170897;24807;25083;24212;83731;29290	Sphk1;Tacr1;Adra2a;Atp1a2;Kcnma1;Adora1
GO:0001706	endoderm formation	6	43	0.0953992	0.489664	63849;311406;25654;29200;81707;81687	Mmp8;Dusp2;Col11a1;Inhba;Mmp14;Mmp9
GO:0019933	cAMP-mediated signaling	6	43	0.0953992	0.489664	245920;305236;360918;140586;81743;171099	Cxcl10;Cxcl11;Pf4;Sox9;Pde2a;Rasd2
GO:0045576	mast cell activation	6	43	0.0953992	0.489664	317676;687536;24832;25316;81511;24451	Lat2;Foxf1;Thy1;Ms4a2;Lat;Hmox1
GO:0048844	artery morphogenesis	6	43	0.0953992	0.489664	79242;155430;266813;84032;687536;25728	Hpgd;Hey2;Prrx1;Col3a1;Foxf1;Apoe
GO:0033044	regulation of chromosome organization	15	145	0.0963134	0.493778	83620;171576;360621;366126;296137;680522;298884;684771;25383;25203;360161;497672;305827;24571;25515	Cit;Bub1b;Cdc6;Spi1;Bub1;Hist1h1b;Gen1;Cdca5;Apobec1;Ccnb1;Nek6;Brca1;Wdhd1;Muc1;Plk1
GO:0002449	lymphocyte mediated immunity	17	169	0.0963973	0.493778	64546;362634;289211;298566;29687;24988;25425;117254;192262;295703;299206;79126;24232;688090;117512;406161;24237	Il12b;C1qc;Fcgr2b;C1qa;C1qb;RT1-M2;Ctsh;Prdx1;C1s;Serping1;Batf;Cfi;C3;RT1-Bb;C9;C4b;C6
GO:0048839	inner ear development	16	157	0.0965003	0.493802	289229;25654;155430;84403;266813;29687;306748;140586;304988;83731;266714;282836;81819;54264;24482;295691	Vangl2;Col11a1;Hey2;Gjb6;Prrx1;C1qb;Cxcl14;Sox9;Mnda;Kcnma1;Myo7a;Cthrc1;Pax8;Mafb;Igf1;Frzb
GO:0032615	interleukin-12 production	5	33	0.0967985	0.494321	64546;353218;500590;25732;292060	Il12b;Tnfsf9;Tnfrsf9;Acp5;Irf8
GO:0032768	regulation of monooxygenase activity	5	33	0.0967985	0.494321	25453;29244;25339;24890;25728	Gdnf;Gch1;Npr3;Esr1;Apoe
GO:0018958	phenol-containing compound metabolic process	10	87	0.097448	0.496629	81819;83783;29244;266807;24950;29452;25557;24848;25017;311374	Pax8;Sult1a1;Gch1;Duox1;Srd5a1;Epas1;Star;Tph1;Myo5a;Duoxa1
GO:0010976	positive regulation of neuron projection development	10	87	0.097448	0.496629	29597;84510;170897;25054;287526;191575;60665;29143;29366;117258	P2ry2;Stmn2;Sphk1;Ntrk2;Serpinf1;Nme1;Cxcl6;Grn;Serpine2;Cntn1
GO:0008406	gonad development	20	206	0.0980335	0.499107	29200;24883;25154;25557;25589;286896;24950;25453;364754;140586;29637;83791;81707;289054;25448;24310;24890;304608;295691;24479	Inhba;Wt1;Pgr;Star;Kdr;Sgpl1;Srd5a1;Gdnf;Fzd8;Sox9;Hmgcs1;Fdps;Mmp14;Aspm;Cenpi;Ace;Esr1;Mmp19;Frzb;Idh1
GO:0006082	organic acid metabolic process	63	760	0.0981845	0.499369	25330;29592;25059;302972;58835;246245;24333;287610;83792;246074;81819;24232;307859;59103;316330;302489;114097;60582;170897;286896;24533;25017;690745;304860;81869;295934;24962;24848;311374;497672;24479;24191;58962;25060;287424;79242;89813;311569;170635;140910;25557;25256;498992;54282;24886;29221;24482;113976;24383;83516;50671;171142;296138;50549;29244;266807;81639;81718;24787;293504;287877;171049;…	Lipe;Bcat1;Hk2;Amdhd2;Phgdh;Fmo2;Eno1;Lpo;Scd;Scd1;Pax8;C3;Chst5;Ptges;Ankrd23;Hs6st2;Ltc4s;Il1rn;Sphk1;Sgpl1;Ldha;Myo5a;Marc1;Npl;Gstm7;Chst1;Cth;Tph1;Duoxa1;Brca1;Idh1;Aldoc;Hpgds;Hk3;Aloxe3;Hpgd;Pdk4;Acss2;Dhrs9;Msmo1;Star;Fmo1;Vnn3;Padi1;Tbxas1;Arg1;Igf1;Acsl4;Gapdh;Ppargc1a;Fasn;Lbp;Acoxl;Cyp4a1;Gch1;Duox1;Alox15;Cdo1;Sod2;Qprt;Pycr1;Folr1;Mthfd2
GO:0051282	regulation of sequestering of calcium ion	9	76	0.0988329	0.501652	245920;305236;301086;79129;24832;117029;81869;25316;25542	Cxcl10;Cxcl11;Xcr1;Cyba;Thy1;Ccr5;Gstm7;Ms4a2;Ccl3
GO:0050851	antigen receptor-mediated signaling pathway	9	76	0.0988329	0.501652	114203;317676;293783;83781;498075;24832;685692;304988;84492	Sh2b2;Lat2;Lpxn;Lgals3;Trat1;Thy1;Gcsam;Mnda;Tec
GO:0050777	negative regulation of immune response	8	65	0.0993458	0.502451	64546;100911545;498275;289211;84032;25704;81639;295703	Il12b;LOC100911545;Fcrlb;Fcgr2b;Col3a1;Il2ra;Alox15;Serping1
GO:0070542	response to fatty acid	8	65	0.0993458	0.502451	83516;89813;191575;25203;29610;116640;308100;83791	Ppargc1a;Pdk4;Nme1;Ccnb1;Tgfbr3;Tnc;Acat2;Fdps
GO:0051302	regulation of cell division	18	182	0.0994904	0.502451	83620;171576;404640;311336;360161;315298;289747;64515;296368;314818;64041;309523;298884;289054;360621;24493;24482;25515	Cit;Bub1b;Mrgprx2;Nusap1;Nek6;Racgap1;Osm;Cdc20;Ube2c;E2f7;Birc5;Kif20b;Gen1;Aspm;Cdc6;Il1a;Igf1;Plk1
GO:0043523	regulation of neuron apoptotic process	18	182	0.0994904	0.502451	117038;117232;25728;25589;113959;25054;24770;25453;25557;64041;24787;63865;25542;65199;83516;24890;24451;364018	Mt3;Barhl1;Apoe;Kdr;C5ar1;Ntrk2;Ccl2;Gdnf;Star;Birc5;Sod2;Lgmn;Ccl3;Kcnip3;Ppargc1a;Esr1;Hmox1;Ncf2
GO:0090087	regulation of peptide transport	18	182	0.0994904	0.502451	360034;59267;289949;81819;24392;170897;314386;24366;24367;65161;25083;117254;64041;81820;58812;25027;29290;25569	Myrip;Syt7;Fam3d;Pax8;Gja1;Sphk1;Gpr68;Fgb;Fgg;Litaf;Adra2a;Prdx1;Birc5;Doc2b;Apln;Slc16a1;Adora1;Trh
GO:0090257	regulation of muscle system process	14	134	0.0997965	0.503491	170897;29571;117558;24807;29427;25083;24212;315611;25349;140939;83791;83731;29290;24482	Sphk1;Scn10a;Mylk2;Tacr1;Aif1;Adra2a;Atp1a2;Scn4b;Scn2b;Trim63;Fdps;Kcnma1;Adora1;Igf1
GO:0034728	nucleosome organization	10	88	0.102567	0.513618	291145;680097;288272;291159;680522;304648;140586;100360950;288242;100912290	Hist1h1a;LOC680097;Mis18a;Hist1h2ail;Hist1h1b;Asf1b;Sox9;LOC100360950;Chaf1b;LOC100912290
GO:0050953	sensory perception of light stimulus	10	88	0.102567	0.513618	302516;64348;25654;29452;29695;266714;81682;25017;365901;29393	Nyx;Cryba4;Col11a1;Epas1;Gabrr2;Myo7a;Lum;Myo5a;Gnat2;Col1a1
GO:0055024	regulation of cardiac muscle tissue development	6	44	0.102789	0.513618	24392;155430;54237;306636;25203;83791	Gja1;Hey2;Cdk1;Efnb2;Ccnb1;Fdps
GO:0010639	negative regulation of organelle organization	18	183	0.102997	0.513618	24171;84510;50665;366126;298282;298884;289747;296654;114482;306575;117524;297339;25383;25203;316521;497672;24482;25515	Add2;Stmn2;Tmsb10;Spi1;Oma1;Gen1;Osm;Gsn;Nek2;Ckap2;Ccnf;Capg;Apobec1;Ccnb1;Vil1;Brca1;Igf1;Plk1
GO:0008610	lipid biosynthetic process	35	397	0.103593	0.513618	25728;89813;140868;24950;116720;83791;83792;246074;24232;24493;365345;59103;81726;170897;25017;25427;313339;29637;58962;287424;116510;311569;170635;140910;25557;64191;24886;114097;24482;113976;50671;89784;81639;497672;314438	Apoe;Pdk4;Fabp5;Srd5a1;Pik3c2g;Fdps;Scd;Scd1;C3;Il1a;Cyb5r2;Ptges;Mvd;Sphk1;Myo5a;Cyp51;Acer2;Hmgcs1;Hpgds;Aloxe3;Timp1;Acss2;Dhrs9;Msmo1;Star;Dhcr7;Tbxas1;Ltc4s;Igf1;Acsl4;Fasn;Idi1;Alox15;Brca1;Degs2
GO:0040013	negative regulation of locomotion	17	171	0.10361	0.513618	498335;689388;60582;25728;116680;287526;84032;24832;83516;117029;24770;685692;29610;29186;116510;29290;29427	Cxcl13;Ptx3;Il1rn;Apoe;Ptpru;Serpinf1;Col3a1;Thy1;Ppargc1a;Ccr5;Ccl2;Gcsam;Tgfbr3;Cd63;Timp1;Adora1;Aif1
GO:0048754	branching morphogenesis of an epithelial tube	15	147	0.104137	0.513618	24883;116640;366126;25154;252929;687536;289229;25453;140586;25589;81819;24890;24482;81707;25425	Wt1;Tnc;Spi1;Pgr;Ctsz;Foxf1;Vangl2;Gdnf;Sox9;Kdr;Pax8;Esr1;Igf1;Mmp14;Ctsh
GO:0042445	hormone metabolic process	15	147	0.104137	0.513618	83516;286896;83783;266807;170635;24950;25557;289596;246075;83731;81819;311374;24890;24482;24310	Ppargc1a;Sgpl1;Sult1a1;Duox1;Dhrs9;Srd5a1;Star;Corin;Prlhr;Kcnma1;Pax8;Duoxa1;Esr1;Igf1;Ace
GO:0048147	negative regulation of fibroblast proliferation	4	24	0.104235	0.513618	24787;24832;290644;81687	Sod2;Thy1;Ifi30;Mmp9
GO:0046688	response to copper ion	4	24	0.104235	0.513618	24834;24493;54237;689415	Tk1;Il1a;Cdk1;Mt2A
GO:0003081	regulation of systemic arterial blood pressure by renin-angiotensin	4	24	0.104235	0.513618	54242;24807;79129;100360872	Cpa3;Tacr1;Cyba;Mcpt1l1
GO:0019835	cytolysis	4	24	0.104235	0.513618	360918;24237;117512;688047	Pf4;C6;C9;Lyz2
GO:0043620	regulation of DNA-templated transcription in response to stress	4	24	0.104235	0.513618	117038;24451;24571;29452	Mt3;Hmox1;Muc1;Epas1
GO:0014047	glutamate secretion	4	24	0.104235	0.513618	29290;25569;25054;60582	Adora1;Trh;Ntrk2;Il1rn
GO:0045940	positive regulation of steroid metabolic process	4	24	0.104235	0.513618	83791;24493;24482;25728	Fdps;Il1a;Igf1;Apoe
GO:0050974	detection of mechanical stimulus involved in sensory perception	4	24	0.104235	0.513618	25364;24482;25654;29366	Asic2;Igf1;Col11a1;Serpine2
GO:0061217	regulation of mesonephros development	4	24	0.104235	0.513618	25453;24883;140586;81819	Gdnf;Wt1;Sox9;Pax8
GO:0019884	antigen processing and presentation of exogenous antigen	4	24	0.104235	0.513618	688090;290644;361689;289211	RT1-Bb;Ifi30;Unc93b1;Fcgr2b
GO:0060349	bone morphogenesis	9	77	0.104392	0.513618	89804;298185;25732;140586;25589;292301;25694;81707;29393	Tek;Frem1;Acp5;Sox9;Kdr;T;Has2;Mmp14;Col1a1
GO:0022407	regulation of cell-cell adhesion	9	77	0.104392	0.513618	498335;60582;24366;24367;117029;81639;29366;24770;25694	Cxcl13;Il1rn;Fgb;Fgg;Ccr5;Alox15;Serpine2;Ccl2;Has2
GO:0043200	response to amino acid	11	100	0.10511	0.513618	50592;84032;79129;83516;24770;24498;81718;296654;170913;29221;29393	Gria1;Col3a1;Cyba;Ppargc1a;Ccl2;Il6;Cdo1;Gsn;Abcb1a;Arg1;Col1a1
GO:0006835	dicarboxylic acid transport	7	55	0.105157	0.513618	84012;60582;25054;293154;29290;25569;171049	Slc1a6;Il1rn;Ntrk2;Folr2;Adora1;Trh;Folr1
GO:0045055	regulated secretory pathway	7	55	0.105157	0.513618	317676;26989;687536;25316;81511;25542;24451	Lat2;Cadps;Foxf1;Ms4a2;Lat;Ccl3;Hmox1
GO:0048661	positive regulation of smooth muscle cell proliferation	7	55	0.105157	0.513618	83516;84007;79129;24482;24498;29427;24451	Ppargc1a;C3ar1;Cyba;Igf1;Il6;Aif1;Hmox1
GO:0002221	pattern recognition receptor signaling pathway	8	66	0.105416	0.513618	501854;361689;56822;305355;291100;58949;84387;499926	Rab7b;Unc93b1;Cd86;Tlr10;Irf4;Ptafr;Pglyrp1;Bpifb1
GO:0051261	protein depolymerization	8	66	0.105416	0.513618	24171;84510;171529;306575;296654;297339;25203;316521	Add2;Stmn2;Kif2c;Ckap2;Gsn;Capg;Ccnb1;Vil1
GO:0002698	negative regulation of immune effector process	8	66	0.105416	0.513618	100911545;289211;83781;687536;25704;295703;84387;24451	LOC100911545;Fcgr2b;Lgals3;Foxf1;Il2ra;Serping1;Pglyrp1;Hmox1
GO:0060038	cardiac muscle cell proliferation	5	34	0.105427	0.513618	25203;54237;24392;155430;29610	Ccnb1;Cdk1;Gja1;Hey2;Tgfbr3
GO:2000243	positive regulation of reproductive process	5	34	0.105427	0.513618	24883;29597;140586;29200;50672	Wt1;P2ry2;Sox9;Inhba;Ednrb
GO:0055021	regulation of cardiac muscle tissue growth	5	34	0.105427	0.513618	25203;54237;24392;155430;83791	Ccnb1;Cdk1;Gja1;Hey2;Fdps
GO:0051353	positive regulation of oxidoreductase activity	5	34	0.105427	0.513618	25453;29244;25339;24890;25728	Gdnf;Gch1;Npr3;Esr1;Apoe
GO:0030072	peptide hormone secretion	18	184	0.106579	0.513618	360034;59267;289949;60582;24392;314386;24366;24367;25083;24498;64041;81820;58812;25027;25569;366949;25017;81819	Myrip;Syt7;Fam3d;Il1rn;Gja1;Gpr68;Fgb;Fgg;Adra2a;Il6;Birc5;Doc2b;Apln;Slc16a1;Trh;Mafa;Myo5a;Pax8
GO:0071480	cellular response to gamma radiation	3	15	0.107017	0.513618	499204;79129;500987	Ddias;Cyba;H2afx
GO:0032735	positive regulation of interleukin-12 production	3	15	0.107017	0.513618	64546;353218;292060	Il12b;Tnfsf9;Irf8
GO:0044321	response to leptin	3	15	0.107017	0.513618	117038;25557;24366	Mt3;Star;Fgb
GO:0044146	negative regulation of growth of symbiont involved in interaction with host	3	15	0.107017	0.513618	64546;292060;246074	Il12b;Irf8;Scd1
GO:0002686	negative regulation of leukocyte migration	3	15	0.107017	0.513618	685692;29290;24770	Gcsam;Adora1;Ccl2
GO:0044144	modulation of growth of symbiont involved in interaction with host	3	15	0.107017	0.513618	64546;292060;246074	Il12b;Irf8;Scd1
GO:0071236	cellular response to antibiotic	3	15	0.107017	0.513618	25557;691657;170913	Star;Crip1;Abcb1a
GO:2000406	positive regulation of T cell migration	3	15	0.107017	0.513618	498335;245920;29427	Cxcl13;Cxcl10;Aif1
GO:0044130	negative regulation of growth of symbiont in host	3	15	0.107017	0.513618	64546;292060;246074	Il12b;Irf8;Scd1
GO:0006027	glycosaminoglycan catabolic process	3	15	0.107017	0.513618	367166;293186;84387	Hyal1;Lyve1;Pglyrp1
GO:0032303	regulation of icosanoid secretion	3	15	0.107017	0.513618	29597;24493;113976	P2ry2;Il1a;Acsl4
GO:0072087	renal vesicle development	3	15	0.107017	0.513618	25453;140586;81819	Gdnf;Sox9;Pax8
GO:0006884	cell volume homeostasis	3	15	0.107017	0.513618	81639;50676;83731	Alox15;Slc6a12;Kcnma1
GO:0071467	cellular response to pH	3	15	0.107017	0.513618	25364;367166;314386	Asic2;Hyal1;Gpr68
GO:0044126	regulation of growth of symbiont in host	3	15	0.107017	0.513618	64546;292060;246074	Il12b;Irf8;Scd1
GO:0006044	N-acetylglucosamine metabolic process	3	15	0.107017	0.513618	307859;683570;302972	Chst5;Gnpda1;Amdhd2
GO:0034349	glial cell apoptotic process	3	15	0.107017	0.513618	24770;64625;100363502	Ccl2;Bid;LOC100363502
GO:0050858	negative regulation of antigen receptor-mediated signaling pathway	3	15	0.107017	0.513618	293783;83781;24832	Lpxn;Lgals3;Thy1
GO:0055012	ventricular cardiac muscle cell differentiation	3	15	0.107017	0.513618	54237;25203;155430	Cdk1;Ccnb1;Hey2
GO:0006865	amino acid transport	13	124	0.107724	0.516098	84012;50676;60582;50719;83509;80900;25054;293154;171049;29290;29221;25569;310392	Slc1a6;Slc6a12;Il1rn;Slc7a5;Slc7a7;Slco1a5;Ntrk2;Folr2;Folr1;Adora1;Arg1;Trh;Slc7a11
GO:0034762	regulation of transmembrane transport	26	284	0.107984	0.516098	315611;406864;684516;65199;25017;24310;259243;24392;29465;192213;81869;306811;83731;24770;29639;81687;116649;50599;116745;25349;25364;83516;29571;83781;116695;64120	Scn4b;Clic1;Kcnc4;Kcnip3;Myo5a;Ace;Kcnip4;Gja1;Trpv2;Rasgrf1;Gstm7;Wnk2;Kcnma1;Ccl2;Fxyd2;Mmp9;Kcnj4;Kcnj3;Kcnh6;Scn2b;Asic2;Ppargc1a;Scn10a;Lgals3;Kcnd1;Kcnk13
GO:0045137	development of primary sexual characteristics	20	209	0.107987	0.516098	29200;24883;25154;25557;25589;286896;24950;25453;364754;140586;29637;83791;81707;289054;25448;24310;24890;304608;295691;24479	Inhba;Wt1;Pgr;Star;Kdr;Sgpl1;Srd5a1;Gdnf;Fzd8;Sox9;Hmgcs1;Fdps;Mmp14;Aspm;Cenpi;Ace;Esr1;Mmp19;Frzb;Idh1
GO:1901214	regulation of neuron death	21	222	0.11003	0.516098	24498;117232;25728;25589;113959;25054;287526;24482;25453;25557;64041;24787;117038;63865;25542;65199;83516;24770;24890;24451;364018	Il6;Barhl1;Apoe;Kdr;C5ar1;Ntrk2;Serpinf1;Igf1;Gdnf;Star;Birc5;Sod2;Mt3;Lgmn;Ccl3;Kcnip3;Ppargc1a;Ccl2;Esr1;Hmox1;Ncf2
GO:0016052	carbohydrate catabolic process	11	101	0.110116	0.516098	24191;25060;24383;83516;25059;24533;113901;24333;79223;282838;24482	Aldoc;Hk3;Gapdh;Ppargc1a;Hk2;Ldha;Chia;Eno1;Gk;Gm2a;Igf1
GO:0045428	regulation of nitric oxide biosynthetic process	6	45	0.110469	0.516098	689388;25732;24498;24787;29427;24890	Ptx3;Acp5;Il6;Sod2;Aif1;Esr1
GO:0045669	positive regulation of osteoblast differentiation	6	45	0.110469	0.516098	24392;406864;304334;304988;282836;24482	Gja1;Clic1;Fam20c;Mnda;Cthrc1;Igf1
GO:0006054	N-acetylneuraminate metabolic process	2	7	0.111436	0.516098	304860;302972	Npl;Amdhd2
GO:1902547	regulation of cellular response to vascular endothelial growth factor stimulus	2	7	0.111436	0.516098	305253;29186	Adamts3;Cd63
GO:2000345	regulation of hepatocyte proliferation	2	7	0.111436	0.516098	361303;113936	Lims2;Cpb2
GO:0051299	centrosome separation	2	7	0.111436	0.516098	114482;171304	Nek2;Kif11
GO:0071873	response to norepinephrine	2	7	0.111436	0.516098	83516;60582	Ppargc1a;Il1rn
GO:0002517	T cell tolerance induction	2	7	0.111436	0.516098	64545;56822	Icos;Cd86
GO:0019530	taurine metabolic process	2	7	0.111436	0.516098	81718;58835	Cdo1;Phgdh
GO:0031915	positive regulation of synaptic plasticity	2	7	0.111436	0.516098	64515;81687	Cdc20;Mmp9
GO:0097084	vascular smooth muscle cell development	2	7	0.111436	0.516098	58966;155430	Ramp2;Hey2
GO:0070828	heterochromatin organization	2	7	0.111436	0.516098	305827;294071	Wdhd1;Hells
GO:0072050	S-shaped body morphogenesis	2	7	0.111436	0.516098	24883;81819	Wt1;Pax8
GO:0009186	deoxyribonucleoside diphosphate metabolic process	2	7	0.111436	0.516098	362720;100359539	Rrm2;LOC100359539
GO:0042713	sperm ejaculation	2	7	0.111436	0.516098	24807;25553	Tacr1;Slc6a4
GO:0031620	regulation of fever generation	2	7	0.111436	0.516098	50672;117029	Ednrb;Ccr5
GO:0006346	methylation-dependent chromatin silencing	2	7	0.111436	0.516098	25383;294071	Apobec1;Hells
GO:0034384	high-density lipoprotein particle clearance	2	7	0.111436	0.516098	291437;25728	Lipg;Apoe
GO:0031652	positive regulation of heat generation	2	7	0.111436	0.516098	58812;117029	Apln;Ccr5
GO:0001781	neutrophil apoptotic process	2	7	0.111436	0.516098	24498;353250	Il6;Niacr1
GO:1903055	positive regulation of extracellular matrix organization	2	7	0.111436	0.516098	140586;113936	Sox9;Cpb2
GO:1901857	positive regulation of cellular respiration	2	7	0.111436	0.516098	83516;100363502	Ppargc1a;LOC100363502
GO:0033004	negative regulation of mast cell activation	2	7	0.111436	0.516098	687536;24451	Foxf1;Hmox1
GO:0006707	cholesterol catabolic process	2	7	0.111436	0.516098	117038;25728	Mt3;Apoe
GO:0071321	cellular response to cGMP	2	7	0.111436	0.516098	25553;81743	Slc6a4;Pde2a
GO:1901724	positive regulation of cell proliferation involved in kidney development	2	7	0.111436	0.516098	117092;84007	Serpinb7;C3ar1
GO:0016127	sterol catabolic process	2	7	0.111436	0.516098	117038;25728	Mt3;Apoe
GO:0060856	establishment of blood-brain barrier	2	7	0.111436	0.516098	298504;170913	Mfsd2a;Abcb1a
GO:0060087	relaxation of vascular smooth muscle	2	7	0.111436	0.516098	29290;83731	Adora1;Kcnma1
GO:0051709	regulation of killing of cells of other organism	2	7	0.111436	0.516098	60665;117029	Cxcl6;Ccr5
GO:2001179	regulation of interleukin-10 secretion	2	7	0.111436	0.516098	499342;500590	Cd274;Tnfrsf9
GO:0015868	purine ribonucleotide transport	2	7	0.111436	0.516098	29584;24392	Gjb1;Gja1
GO:0002883	regulation of hypersensitivity	2	7	0.111436	0.516098	24232;289211	C3;Fcgr2b
GO:0010955	negative regulation of protein processing	8	67	0.111687	0.516309	100911545;25308;290326;266775;116510;295703;113936;29366	LOC100911545;Cstb;Pbk;Serpinb10;Timp1;Serping1;Cpb2;Serpine2
GO:1903318	negative regulation of protein maturation	8	67	0.111687	0.516309	100911545;25308;290326;266775;116510;295703;113936;29366	LOC100911545;Cstb;Pbk;Serpinb10;Timp1;Serping1;Cpb2;Serpine2
GO:0002028	regulation of sodium ion transport	7	56	0.112066	0.517583	81503;315611;25349;306811;29366;29639;117258	Cxcl1;Scn4b;Scn2b;Wnk2;Serpine2;Fxyd2;Cntn1
GO:0006820	anion transport	33	375	0.112821	0.518911	29597;25728;406864;25054;293154;314847;25027;25569;24493;80900;24310;84012;50719;60582;24392;29695;315298;24778;29290;113976;24777;63843;83509;298504;29221;310392;114511;50676;29242;117264;29440;81658;171049	P2ry2;Apoe;Clic1;Ntrk2;Folr2;Best3;Slc16a1;Trh;Il1a;Slco1a5;Ace;Slc1a6;Slc7a5;Il1rn;Gja1;Gabrr2;Racgap1;Slc2a1;Adora1;Acsl4;Slc10a1;P2ry4;Slc7a7;Mfsd2a;Arg1;Slc7a11;Emb;Slc6a12;Car4;P2ry6;Slc26a4;Gabrp;Folr1
GO:0008585	female gonad development	10	90	0.113262	0.518911	25154;286896;24883;29200;25448;25589;24890;304608;81707;24479	Pgr;Sgpl1;Wt1;Inhba;Cenpi;Kdr;Esr1;Mmp19;Mmp14;Idh1
GO:0015672	monovalent inorganic cation transport	35	401	0.113401	0.518911	293650;170899;29186;684516;24213;65199;287106;117258;317170;360539;259243;117596;81503;100909725;315611;306811;83731;29290;29639;24777;116649;50599;116745;25349;297932;29366;25364;685232;365391;24212;29571;116695;64120;84396;24778	Tcirg1;Kcnk2;Cd63;Kcnc4;Atp1a3;Kcnip3;Prss30;Cntn1;Slc9a7;Slc47a1;Kcnip4;Atp6v1b2;Cxcl1;LOC100909725;Scn4b;Wnk2;Kcnma1;Adora1;Fxyd2;Slc10a1;Kcnj4;Kcnj3;Kcnh6;Scn2b;Atp6v0d2;Serpine2;Asic2;Atp6v1a;Trpm5;Atp1a2;Scn10a;Kcnd1;Kcnk13;Atp1b4;Slc2a1
GO:0007267	cell-cell signaling	63	769	0.113711	0.518911	360034;289949;81819;25334;25054;64515;79431;24498;64041;25364;116640;25569;171099;25017;25033;81687;60582;24392;353250;25686;63997;192213;170897;24770;292406;81820;83731;29290;289997;498335;117558;50592;314386;191573;289747;24807;117029;171394;25453;25557;29200;25553;29366;25027;26989;684516;25542;287562;50568;59267;24367;362235;24212;25083;24366;140586;58814;58812;29143;114090;25589;366949;65178	Myrip;Fam3d;Pax8;Bhlha15;Ntrk2;Cdc20;Bhlhe40;Il6;Birc5;Asic2;Tnc;Trh;Rasd2;Myo5a;Sstr1;Mmp9;Il1rn;Gja1;Niacr1;Gnai1;Slc29a1;Rasgrf1;Sphk1;Ccl2;Thbs2;Doc2b;Kcnma1;Adora1;Dlgap5;Cxcl13;Mylk2;Gria1;Gpr68;Grin3a;Osm;Tacr1;Ccr5;Clstn2;Gdnf;Star;Inhba;Slc6a4;Serpine2;Slc16a1;Cadps;Kcnc4;Ccl3;Ccl12;Cspg5;Syt7;Fgg;Syndig1;Atp1a2;Adra2a;Fgb;Sox9;Tmod2;Apln;Grn;Egr2;Kdr;Mafa;Snap91
GO:0023056	positive regulation of signaling	79	983	0.113827	0.518911	114203;25524;24807;170897;498075;305253;24366;24498;364754;116637;25542;290361;25569;360161;24890;24232;310621;245920;24493;60582;24392;353250;360918;266813;84032;192213;81651;81820;29610;24962;360034;29290;679975;25425;113959;24451;29393;64546;305236;89804;25054;50592;314386;89824;287885;65161;289747;25651;311426;170824;25589;29200;301227;81511;29186;289054;24770;361303;29366;24482;83504;117038;…	Sh2b2;Psap;Tacr1;Sphk1;Trat1;Adamts3;Fgb;Il6;Fzd8;Ccl4;Ccl3;Dok2;Trh;Nek6;Esr1;C3;Iqgap3;Cxcl10;Il1a;Il1rn;Gja1;Niacr1;Pf4;Prrx1;Col3a1;Rasgrf1;Cspg4;Doc2b;Tgfbr3;Cth;Myrip;Adora1;Gpr183;Ctsh;C5ar1;Hmox1;Col1a1;Il12b;Cxcl11;Tek;Ntrk2;Gria1;Gpr68;Chi3l1;Sectm1a;Litaf;Osm;Selp;Siglec1;Steap3;Kdr;Inhba;Trem2;Lat;Cd63;Aspm;Ccl2;Lims2;Serpine2;Igf1;Kl;Mt3;Scimp;Meis3;Vangl2;Ly96;Bub1;Fgg;Cxcl6;Adra2a;…
GO:0002521	leukocyte differentiation	30	337	0.11412	0.518911	362076;362634;25704;24498;364754;84387;25542;688090;25033;353218;81743;54264;64546;56822;314386;304334;291100;25732;191575;361226;301227;299206;361537;366126;679975;287818;360918;297077;29168;171411	Il36b;C1qc;Il2ra;Il6;Fzd8;Pglyrp1;Ccl3;RT1-Bb;Sstr1;Tnfsf9;Pde2a;Mafb;Il12b;Cd86;Gpr68;Fam20c;Irf4;Acp5;Nme1;Cd83;Trem2;Batf;Tyrobp;Spi1;Gpr183;Cd300lf;Pf4;Tmem176a;Ubd;Tmem176b
GO:0032418	lysosome localization	5	35	0.114419	0.518911	317676;687536;81511;25316;24451	Lat2;Foxf1;Lat;Ms4a2;Hmox1
GO:0017158	regulation of calcium ion-dependent exocytosis	5	35	0.114419	0.518911	59267;26989;81820;65171;25083	Syt7;Cadps;Doc2b;Scamp5;Adra2a
GO:0045600	positive regulation of fat cell differentiation	5	35	0.114419	0.518911	316842;310395;24482;295691;24848	Metrnl;Ccr4;Igf1;Frzb;Tph1
GO:0035987	endodermal cell differentiation	5	35	0.114419	0.518911	25654;29200;63849;81707;81687	Col11a1;Inhba;Mmp8;Mmp14;Mmp9
GO:0055085	transmembrane transport	75	930	0.114918	0.518911	317170;287450;293650;406864;29584;170899;192213;29440;117596;360539;29599;684516;24213;65199;170913;303772;25017;24891;81687;84012;50719;259243;25349;24392;298340;29465;29695;362861;100909725;315611;300027;306811;24904;83731;24770;29639;24310;24777;305625;63848;50592;63997;191573;60338;116649;24212;50599;116745;25364;83509;25553;297932;298504;25027;685232;365391;310392;25753;114511;306009;50676;5…	Slc9a7;Slc16a11;Tcirg1;Clic1;Gjb1;Kcnk2;Rasgrf1;Slc26a4;Atp6v1b2;Slc47a1;Atp2b3;Kcnc4;Atp1a3;Kcnip3;Abcb1a;Slc16a6;Myo5a;Abcb4;Mmp9;Slc1a6;Slc7a5;Kcnip4;Scn2b;Gja1;Slc6a14;Trpv2;Gabrr2;Slc41a2;LOC100909725;Scn4b;Gpihbp1;Wnk2;Slc22a1;Kcnma1;Ccl2;Fxyd2;Ace;Slc10a1;Mfsd7;Fxyd7;Gria1;Slc29a1;Grin3a;Fxyd5;Kcnj4;Atp1a2;Kcnj3;Kcnh6;Asic2;Slc7a7;Slc6a4;Atp6v0d2;Mfsd2a;Slc16a1;Atp6v1a;Trpm5;Slc7a11;Chrng;…
GO:0006790	sulfur compound metabolic process	20	211	0.114959	0.518911	302489;81726;288617;50559;81819;89813;50671;83783;311569;58835;81718;361993;81869;295934;24787;24962;287610;307859;24482;24479	Hs6st2;Mvd;Tpst1;Acot1;Pax8;Pdk4;Fasn;Sult1a1;Acss2;Phgdh;Cdo1;Them5;Gstm7;Chst1;Sod2;Cth;Lpo;Chst5;Igf1;Idh1
GO:0061138	morphogenesis of a branching epithelium	17	174	0.115038	0.518911	24498;116640;25154;366126;252929;687536;24883;289229;25453;140586;498997;25589;81819;24890;24482;81707;25425	Il6;Tnc;Pgr;Spi1;Ctsz;Foxf1;Wt1;Vangl2;Gdnf;Sox9;Rspo3;Kdr;Pax8;Esr1;Igf1;Mmp14;Ctsh
GO:1901987	regulation of cell cycle phase transition	17	174	0.115038	0.518911	363227;360243;304477;296137;54237;298884;315852;114494;314818;25203;360621;29427;308768;360161;64625;24571;25515	Nabp1;Top2a;Kntc1;Bub1;Cdk1;Gen1;Ttk;Ccna2;E2f7;Ccnb1;Cdc6;Aif1;Ticrr;Nek6;Bid;Muc1;Plk1
GO:0090279	regulation of calcium ion import	4	25	0.115038	0.518911	24770;83781;24310;29465	Ccl2;Lgals3;Ace;Trpv2
GO:0003338	metanephros morphogenesis	4	25	0.115038	0.518911	25453;24883;140586;81819	Gdnf;Wt1;Sox9;Pax8
GO:0002294	CD4-positive, alpha-beta T cell differentiation involved in immune response	4	25	0.115038	0.518911	64546;24498;291100;299206	Il12b;Il6;Irf4;Batf
GO:0008207	C21-steroid hormone metabolic process	4	25	0.115038	0.518911	25557;170635;24950;83731	Star;Dhrs9;Srd5a1;Kcnma1
GO:0006084	acetyl-CoA metabolic process	4	25	0.115038	0.518911	81726;311569;89813;50671	Mvd;Acss2;Pdk4;Fasn
GO:0030834	regulation of actin filament depolymerization	4	25	0.115038	0.518911	316521;297339;24171;296654	Vil1;Capg;Add2;Gsn
GO:0030803	negative regulation of cyclic nucleotide biosynthetic process	4	25	0.115038	0.518911	29235;25339;81743;25083	Galr3;Npr3;Pde2a;Adra2a
GO:0070849	response to epidermal growth factor	4	25	0.115038	0.518911	24773;140586;316521;29393	Sftpa1;Sox9;Vil1;Col1a1
GO:0010712	regulation of collagen metabolic process	4	25	0.115038	0.518911	24498;24770;113898;117092	Il6;Ccl2;Prdx5;Serpinb7
GO:0030818	negative regulation of cAMP biosynthetic process	4	25	0.115038	0.518911	29235;25339;81743;25083	Galr3;Npr3;Pde2a;Adra2a
GO:0033028	myeloid cell apoptotic process	4	25	0.115038	0.518911	24498;679787;353250;117029	Il6;Clec5a;Niacr1;Ccr5
GO:0042093	T-helper cell differentiation	4	25	0.115038	0.518911	64546;24498;291100;299206	Il12b;Il6;Irf4;Batf
GO:1901991	negative regulation of mitotic cell cycle phase transition	12	114	0.116407	0.524615	360243;304477;296137;54237;298884;315852;363227;314818;25203;308768;24571;25515	Top2a;Kntc1;Bub1;Cdk1;Gen1;Ttk;Nabp1;E2f7;Ccnb1;Ticrr;Muc1;Plk1
GO:2001234	negative regulation of apoptotic signaling pathway	15	150	0.116577	0.52491	361514;294071;289777;24366;24367;83781;24482;25453;24787;25572;24962;360918;497672;24451;24571	Meis3;Hells;Fignl1;Fgb;Fgg;Lgals3;Igf1;Gdnf;Sod2;Tnfrsf4;Cth;Pf4;Brca1;Hmox1;Muc1
GO:0030278	regulation of ossification	14	138	0.116936	0.526055	29597;24392;406864;304334;24848;24807;304988;25542;140586;114090;282836;310395;24482;83504	P2ry2;Gja1;Clic1;Fam20c;Tph1;Tacr1;Mnda;Ccl3;Sox9;Egr2;Cthrc1;Ccr4;Igf1;Kl
GO:0002758	innate immune response-activating signal transduction	8	68	0.118156	0.531066	501854;361689;56822;305355;291100;58949;84387;499926	Rab7b;Unc93b1;Cd86;Tlr10;Irf4;Ptafr;Pglyrp1;Bpifb1
GO:0048520	positive regulation of behavior	10	91	0.118836	0.533649	498335;245920;24392;84007;287561;24770;116637;25542;25589;29427	Cxcl13;Cxcl10;Gja1;C3ar1;Ccl7;Ccl2;Ccl4;Ccl3;Kdr;Aif1
GO:0015711	organic anion transport	25	275	0.119075	0.534244	29597;25728;25054;293154;25027;25569;24493;80900;24310;84012;50719;60582;24392;83509;24778;29290;113976;24777;298504;29221;310392;114511;50676;29242;171049	P2ry2;Apoe;Ntrk2;Folr2;Slc16a1;Trh;Il1a;Slco1a5;Ace;Slc1a6;Slc7a5;Il1rn;Gja1;Slc7a7;Slc2a1;Adora1;Acsl4;Slc10a1;Mfsd2a;Arg1;Slc7a11;Emb;Slc6a12;Car4;Folr1
GO:0046209	nitric oxide metabolic process	7	57	0.119207	0.534359	689388;24599;25732;24498;24787;29427;24890	Ptx3;Nos2;Acp5;Il6;Sod2;Aif1;Esr1
GO:0045926	negative regulation of growth	16	163	0.120068	0.535866	64546;117038;292060;25553;246074;245918;117029;24883;367166;24333;29200;63865;24962;29366;295691;689415	Il12b;Mt3;Irf8;Slc6a4;Scd1;Cgref1;Ccr5;Wt1;Hyal1;Eno1;Inhba;Lgmn;Cth;Serpine2;Frzb;Mt2A
GO:0010647	positive regulation of cell communication	79	987	0.120339	0.535866	114203;25524;24807;170897;498075;305253;24366;24498;364754;116637;25542;290361;25569;360161;24890;24232;310621;245920;24493;60582;24392;353250;360918;266813;84032;192213;81651;81820;29610;24962;360034;29290;679975;25425;113959;24451;29393;64546;305236;89804;25054;50592;314386;89824;287885;65161;289747;25651;311426;170824;25589;29200;301227;81511;29186;289054;24770;361303;29366;24482;83504;117038;…	Sh2b2;Psap;Tacr1;Sphk1;Trat1;Adamts3;Fgb;Il6;Fzd8;Ccl4;Ccl3;Dok2;Trh;Nek6;Esr1;C3;Iqgap3;Cxcl10;Il1a;Il1rn;Gja1;Niacr1;Pf4;Prrx1;Col3a1;Rasgrf1;Cspg4;Doc2b;Tgfbr3;Cth;Myrip;Adora1;Gpr183;Ctsh;C5ar1;Hmox1;Col1a1;Il12b;Cxcl11;Tek;Ntrk2;Gria1;Gpr68;Chi3l1;Sectm1a;Litaf;Osm;Selp;Siglec1;Steap3;Kdr;Inhba;Trem2;Lat;Cd63;Aspm;Ccl2;Lims2;Serpine2;Igf1;Kl;Mt3;Scimp;Meis3;Vangl2;Ly96;Bub1;Fgg;Cxcl6;Adra2a;…
GO:0051604	protein maturation	27	301	0.120869	0.535866	266758;25728;289596;298282;290326;266775;292848;360772;24232;25425;100911545;313339;295703;85266;363265;24237;81707;305253;25308;116510;113936;29366;25515;290757;25083;100363502;64625	Sec11c;Apoe;Corin;Oma1;Pbk;Serpinb10;Klk13;Zfand2a;C3;Ctsh;LOC100911545;Acer2;Serping1;Prss12;Col4a3;C6;Mmp14;Adamts3;Cstb;Timp1;Cpb2;Serpine2;Plk1;F11;Adra2a;LOC100363502;Bid
GO:0051905	establishment of pigment granule localization	3	16	0.12125	0.535866	266714;25017;501162	Myo7a;Myo5a;Mreg
GO:0010224	response to UV-B	3	16	0.12125	0.535866	64546;367166;691657	Il12b;Hyal1;Crip1
GO:0046605	regulation of centrosome cycle	3	16	0.12125	0.535866	117524;310344;298884	Ccnf;Plk4;Gen1
GO:0035809	regulation of urine volume	3	16	0.12125	0.535866	25339;50672;25694	Npr3;Ednrb;Has2
GO:0009404	toxin metabolic process	3	16	0.12125	0.535866	25557;246245;25256	Star;Fmo2;Fmo1
GO:0051904	pigment granule transport	3	16	0.12125	0.535866	266714;25017;501162	Myo7a;Myo5a;Mreg
GO:0019430	removal of superoxide radicals	3	16	0.12125	0.535866	117254;117038;24787	Prdx1;Mt3;Sod2
GO:0050995	negative regulation of lipid catabolic process	3	16	0.12125	0.535866	29290;353250;25083	Adora1;Niacr1;Adra2a
GO:0048266	behavioral response to pain	3	16	0.12125	0.535866	65199;289747;24807	Kcnip3;Osm;Tacr1
GO:0015858	nucleoside transport	3	16	0.12125	0.535866	29290;24392;63997	Adora1;Gja1;Slc29a1
GO:0060122	inner ear receptor stereocilium organization	3	16	0.12125	0.535866	266714;282836;289229	Myo7a;Cthrc1;Vangl2
GO:0006882	cellular zinc ion homeostasis	3	16	0.12125	0.535866	306009;117038;689415	Slc39a14;Mt3;Mt2A
GO:0001832	blastocyst growth	3	16	0.12125	0.535866	170568;499914;299210	Dmbt1;Gins1;Esrrb
GO:0048523	negative regulation of cellular process	204	2700	0.122406	0.540499	499342;85497;81819;89813;298282;266775;79431;24498;54296;84387;294043;24493;100912290;24310;245920;24392;315691;29692;304988;29610;24962;29290;54289;54264;498335;89804;360243;58966;314386;65161;291100;191575;363227;25453;114482;29200;24787;311723;289054;100360950;25515;83620;312897;24383;50672;289229;83781;81639;24464;25589;292301;309304;25524;362634;25728;170897;500590;54237;364754;117524;25203;…	Cd274;Klf15;Pax8;Pdk4;Oma1;Serpinb10;Bhlhe40;Il6;Rgs7;Pglyrp1;Sorcs3;Il1a;LOC100912290;Ace;Cxcl10;Gja1;Lingo1;Pla2g2a;Mnda;Tgfbr3;Cth;Adora1;Rgs1;Mafb;Cxcl13;Tek;Top2a;Ramp2;Gpr68;Litaf;Irf4;Nme1;Nabp1;Gdnf;Nek2;Inhba;Sod2;Sox18;Aspm;LOC100360950;Plk1;Cit;Msc;Gapdh;Ednrb;Vangl2;Lgals3;Alox15;Hp;Kdr;T;Pdcd1lg2;Psap;C1qc;Apoe;Sphk1;Tnfrsf9;Cdk1;Fzd8;Ccnf;Ccnb1;LOC680097;Galr3;Gnai1;Ticrr;Muc1;Mzb1;…
GO:0048589	developmental growth	26	289	0.123183	0.543454	170568;25524;25728;299210;54237;117038;296654;25203;24232;24890;24392;29465;310448;499914;84492;116640;155430;117029;24883;289054;24482;289229;50692;140586;25589;83791	Dmbt1;Psap;Apoe;Esrrb;Cdk1;Mt3;Gsn;Ccnb1;C3;Esr1;Gja1;Trpv2;Igsf10;Gins1;Tec;Tnc;Hey2;Ccr5;Wt1;Aspm;Igf1;Vangl2;Plaur;Sox9;Kdr;Fdps
GO:0048662	negative regulation of smooth muscle cell proliferation	5	36	0.123764	0.54363	64546;29427;25339;24890;24451	Il12b;Aif1;Npr3;Esr1;Hmox1
GO:0044246	regulation of multicellular organismal metabolic process	5	36	0.123764	0.54363	24498;298282;113898;117092;24770	Il6;Oma1;Prdx5;Serpinb7;Ccl2
GO:0001990	regulation of systemic arterial blood pressure by hormone	5	36	0.123764	0.54363	54242;24807;79129;100360872;289596	Cpa3;Tacr1;Cyba;Mcpt1l1;Corin
GO:0051931	regulation of sensory perception	5	36	0.123764	0.54363	29290;24493;50654;50672;25542	Adora1;Il1a;Ctss;Ednrb;Ccl3
GO:0051930	regulation of sensory perception of pain	5	36	0.123764	0.54363	29290;24493;50654;50672;25542	Adora1;Il1a;Ctss;Ednrb;Ccl3
GO:0001649	osteoblast differentiation	16	164	0.124299	0.545505	114122;116640;406864;289777;298943;304334;50671;29393;304988;679787;25542;282836;310395;24890;24482;24392	Vcan;Tnc;Clic1;Fignl1;Bcap29;Fam20c;Fasn;Col1a1;Mnda;Clec5a;Ccl3;Cthrc1;Ccr4;Esr1;Igf1;Gja1
GO:0046545	development of primary female sexual characteristics	10	92	0.124559	0.545879	25154;286896;24883;29200;25448;25589;24890;304608;81707;24479	Pgr;Sgpl1;Wt1;Inhba;Cenpi;Kdr;Esr1;Mmp19;Mmp14;Idh1
GO:0071260	cellular response to mechanical stimulus	8	69	0.124819	0.545879	24392;79129;116649;24212;140586;81743;24773;29393	Gja1;Cyba;Kcnj4;Atp1a2;Sox9;Pde2a;Sftpa1;Col1a1
GO:0038127	ERBB signaling pathway	8	69	0.124819	0.545879	25046;25083;140586;63865;292699;29290;316521;24890	Pigr;Adra2a;Sox9;Lgmn;Cblc;Adora1;Vil1;Esr1
GO:0006639	acylglycerol metabolic process	8	69	0.124819	0.545879	499264;25330;25728;25086;79223;24232;24890;113976	Apobr;Lipe;Apoe;Cyp2e1;Gk;C3;Esr1;Acsl4
GO:0007623	circadian rhythm	15	152	0.125336	0.547624	170913;24848;25553;25054;79431;24950;24498;25557;84387;83731;305509;29290;24773;310395;83516	Abcb1a;Tph1;Slc6a4;Ntrk2;Bhlhe40;Srd5a1;Il6;Star;Pglyrp1;Kcnma1;Adcy1;Adora1;Sftpa1;Ccr4;Ppargc1a
GO:0048731	system development	238	3175	0.125929	0.547624	29597;85497;81819;79431;29599;24498;679975;84387;24493;100912290;310621;245920;50719;25349;24392;29465;246118;315691;304988;29610;83731;306071;54264;498335;78960;89804;360243;58966;80900;314386;191573;291100;191575;25453;304913;24787;311723;289054;100360950;25694;311374;83620;312897;50672;289229;50568;29687;287818;29452;294071;306636;24464;81707;25589;292301;83781;114203;300691;362634;25728;25059…	P2ry2;Klf15;Pax8;Bhlhe40;Atp2b3;Il6;Gpr183;Pglyrp1;Il1a;LOC100912290;Iqgap3;Cxcl10;Slc7a5;Scn2b;Gja1;Trpv2;Tubb3;Lingo1;Mnda;Tgfbr3;Kcnma1;Lcp1;Mafb;Cxcl13;Prx;Tek;Top2a;Ramp2;Slco1a5;Gpr68;Grin3a;Irf4;Nme1;Gdnf;Tnn;Sod2;Sox18;Aspm;LOC100360950;Has2;Duoxa1;Cit;Msc;Ednrb;Vangl2;Cspg5;C1qb;Cd300lf;Epas1;Hells;Efnb2;Hp;Mmp14;Kdr;T;Lgals3;Sh2b2;Nnmt;C1qc;Apoe;Hk2;Tk1;Ntrk2;Cdc20;Ctsh;Dscaml1;Fzd8;Ccn…
GO:0034113	heterotypic cell-cell adhesion	4	26	0.126308	0.547624	81639;24367;60582;24366	Alox15;Fgg;Il1rn;Fgb
GO:0044062	regulation of excretion	4	26	0.126308	0.547624	29290;24807;50672;289596	Adora1;Tacr1;Ednrb;Corin
GO:2000649	regulation of sodium ion transmembrane transporter activity	4	26	0.126308	0.547624	315611;29639;306811;25349	Scn4b;Fxyd2;Wnk2;Scn2b
GO:0031577	spindle checkpoint	4	26	0.126308	0.547624	296137;298884;25203;25515	Bub1;Gen1;Ccnb1;Plk1
GO:0002293	alpha-beta T cell differentiation involved in immune response	4	26	0.126308	0.547624	64546;24498;291100;299206	Il12b;Il6;Irf4;Batf
GO:0010812	negative regulation of cell-substrate adhesion	4	26	0.126308	0.547624	313339;81707;363060;29393	Acer2;Mmp14;Plet1;Col1a1
GO:0030815	negative regulation of cAMP metabolic process	4	26	0.126308	0.547624	29235;25339;81743;25083	Galr3;Npr3;Pde2a;Adra2a
GO:0030800	negative regulation of cyclic nucleotide metabolic process	4	26	0.126308	0.547624	29235;25339;81743;25083	Galr3;Npr3;Pde2a;Adra2a
GO:0045445	myoblast differentiation	7	58	0.126577	0.548254	245920;360579;306748;29452;140586;292301;24482	Cxcl10;Ccl9;Cxcl14;Epas1;Sox9;T;Igf1
GO:0002224	toll-like receptor signaling pathway	6	47	0.126671	0.548254	501854;361689;56822;305355;291100;499926	Rab7b;Unc93b1;Cd86;Tlr10;Irf4;Bpifb1
GO:0051051	negative regulation of transport	29	329	0.128143	0.549428	64557;289949;25350;25728;500590;24498;314847;25569;24890;24310;291675;60582;289211;192211;81869;81743;29290;81687;24451;687536;498075;65161;289747;29366;25572;113976;83781;25083;65171	Bard1;Fam3d;Sftpd;Apoe;Tnfrsf9;Il6;Best3;Trh;Esr1;Ace;Mzb1;Il1rn;Fcgr2b;Prom2;Gstm7;Pde2a;Adora1;Mmp9;Hmox1;Foxf1;Trat1;Litaf;Osm;Serpine2;Tnfrsf4;Acsl4;Lgals3;Adra2a;Scamp5
GO:0002793	positive regulation of peptide secretion	9	81	0.128346	0.549428	360034;24392;314386;24366;24367;81820;58812;29290;25569	Myrip;Gja1;Gpr68;Fgb;Fgg;Doc2b;Apln;Adora1;Trh
GO:0050795	regulation of behavior	15	153	0.129854	0.549428	498335;306636;24392;84007;287561;25542;24770;24498;116637;84387;29427;25589;29290;25569;245920	Cxcl13;Efnb2;Gja1;C3ar1;Ccl7;Ccl3;Ccl2;Il6;Ccl4;Pglyrp1;Aif1;Kdr;Adora1;Trh;Cxcl10
GO:0030097	hemopoiesis	48	578	0.130065	0.549428	362076;362634;292060;25704;24498;364754;499204;84387;25542;680097;688090;100912290;25033;353218;691857;286896;29610;81743;54264;64546;501854;89804;360243;56822;314386;304334;291100;25732;191575;361226;29200;301227;100360950;299206;361537;24171;364396;366126;679975;287818;29452;360918;24787;679787;297077;25589;29168;171411	Il36b;C1qc;Irf8;Il2ra;Il6;Fzd8;Ddias;Pglyrp1;Ccl3;LOC680097;RT1-Bb;LOC100912290;Sstr1;Tnfsf9;Pygo1;Sgpl1;Tgfbr3;Pde2a;Mafb;Il12b;Rab7b;Tek;Top2a;Cd86;Gpr68;Fam20c;Irf4;Acp5;Nme1;Cd83;Inhba;Trem2;LOC100360950;Batf;Tyrobp;Add2;Arl11;Spi1;Gpr183;Cd300lf;Epas1;Pf4;Sod2;Clec5a;Tmem176a;Kdr;Ubd;Tmem176b
GO:0035725	sodium ion transmembrane transport	10	93	0.13043	0.549428	24213;29571;365391;24212;315611;25349;306811;25364;29639;317170	Atp1a3;Scn10a;Trpm5;Atp1a2;Scn4b;Scn2b;Wnk2;Asic2;Fxyd2;Slc9a7
GO:0016337	single organismal cell-cell adhesion	21	228	0.131311	0.549428	498335;89804;64545;60582;406864;116680;24367;687536;25651;24366;117029;24832;81639;25544;140586;29366;192129;24770;361303;310392;25694	Cxcl13;Tek;Icos;Il1rn;Clic1;Ptpru;Fgg;Foxf1;Selp;Fgb;Ccr5;Thy1;Alox15;Sele;Sox9;Serpine2;Vmp1;Ccl2;Lims2;Slc7a11;Has2
GO:0046660	female sex differentiation	11	105	0.131483	0.549428	25154;286896;24950;24883;29200;25448;25589;24890;304608;81707;24479	Pgr;Sgpl1;Srd5a1;Wt1;Inhba;Cenpi;Kdr;Esr1;Mmp19;Mmp14;Idh1
GO:0000075	cell cycle checkpoint	12	117	0.131784	0.549428	360243;304477;500987;296137;54237;298884;315852;363227;25203;308768;24571;25515	Top2a;Kntc1;H2afx;Bub1;Cdk1;Gen1;Ttk;Nabp1;Ccnb1;Ticrr;Muc1;Plk1
GO:0043367	CD4-positive, alpha-beta T cell differentiation	5	37	0.133448	0.549428	361226;64546;291100;299206;24498	Cd83;Il12b;Irf4;Batf;Il6
GO:0010633	negative regulation of epithelial cell migration	5	37	0.133448	0.549428	498335;25728;287526;29610;29186	Cxcl13;Apoe;Serpinf1;Tgfbr3;Cd63
GO:0071479	cellular response to ionizing radiation	5	37	0.133448	0.549428	499204;79129;499870;289777;500987	Ddias;Cyba;Rad51;Fignl1;H2afx
GO:0007566	embryo implantation	5	37	0.133448	0.549428	192129;29366;116510;29143;81687	Vmp1;Serpine2;Timp1;Grn;Mmp9
GO:1902041	regulation of extrinsic apoptotic signaling pathway via death domain receptors	5	37	0.133448	0.549428	24366;24367;83781;497672;24451	Fgb;Fgg;Lgals3;Brca1;Hmox1
GO:0051156	glucose 6-phosphate metabolic process	2	8	0.133525	0.549428	25060;25059	Hk3;Hk2
GO:0010758	regulation of macrophage chemotaxis	2	8	0.133525	0.549428	24770;84007	Ccl2;C3ar1
GO:0072282	metanephric nephron tubule morphogenesis	2	8	0.133525	0.549428	140586;81819	Sox9;Pax8
GO:0009812	flavonoid metabolic process	2	8	0.133525	0.549428	83783;83516	Sult1a1;Ppargc1a
GO:2000018	regulation of male gonad development	2	8	0.133525	0.549428	24883;140586	Wt1;Sox9
GO:0019372	lipoxygenase pathway	2	8	0.133525	0.549428	81639;287424	Alox15;Aloxe3
GO:0010744	positive regulation of macrophage derived foam cell differentiation	2	8	0.133525	0.549428	498638;360918	Msr1;Pf4
GO:0060462	lung lobe development	2	8	0.133525	0.549428	687536;24482	Foxf1;Igf1
GO:0071377	cellular response to glucagon stimulus	2	8	0.133525	0.549428	29221;24953	Arg1;Gcgr
GO:1901741	positive regulation of myoblast fusion	2	8	0.133525	0.549428	29455;24251	Gdf15;Cd53
GO:0045086	positive regulation of interleukin-2 biosynthetic process	2	8	0.133525	0.549428	291100;24493	Irf4;Il1a
GO:0051382	kinetochore assembly	2	8	0.133525	0.549428	298850;689399	Cenpa;Cenpw
GO:0072575	epithelial cell proliferation involved in liver morphogenesis	2	8	0.133525	0.549428	361303;113936	Lims2;Cpb2
GO:0032693	negative regulation of interleukin-10 production	2	8	0.133525	0.549428	64546;289211	Il12b;Fcgr2b
GO:0072574	hepatocyte proliferation	2	8	0.133525	0.549428	361303;113936	Lims2;Cpb2
GO:0002524	hypersensitivity	2	8	0.133525	0.549428	24232;289211	C3;Fcgr2b
GO:0045916	negative regulation of complement activation	2	8	0.133525	0.549428	100911545;295703	LOC100911545;Serping1
GO:2001204	regulation of osteoclast development	2	8	0.133525	0.549428	361537;314386	Tyrobp;Gpr68
GO:0072584	caveolin-mediated endocytosis	2	8	0.133525	0.549428	315215;192211	Mlc1;Prom2
GO:0006012	galactose metabolic process	2	8	0.133525	0.549428	295934;83516	Chst1;Ppargc1a
GO:0050765	negative regulation of phagocytosis	2	8	0.133525	0.549428	25350;289211	Sftpd;Fcgr2b
GO:0044557	relaxation of smooth muscle	2	8	0.133525	0.549428	29290;83731	Adora1;Kcnma1
GO:0015865	purine nucleotide transport	2	8	0.133525	0.549428	29584;24392	Gjb1;Gja1
GO:0060600	dichotomous subdivision of an epithelial terminal unit	2	8	0.133525	0.549428	289229;25425	Vangl2;Ctsh
GO:2000258	negative regulation of protein activation cascade	2	8	0.133525	0.549428	100911545;295703	LOC100911545;Serping1
GO:0034144	negative regulation of toll-like receptor 4 signaling pathway	2	8	0.133525	0.549428	501854;499926	Rab7b;Bpifb1
GO:0043691	reverse cholesterol transport	2	8	0.133525	0.549428	291437;25728	Lipg;Apoe
GO:0071243	cellular response to arsenic-containing substance	2	8	0.133525	0.549428	360772;24451	Zfand2a;Hmox1
GO:0006515	misfolded or incompletely synthesized protein catabolic process	2	8	0.133525	0.549428	298282;680945	Oma1;Sdf2l1
GO:0043116	negative regulation of vascular permeability	2	8	0.133525	0.549428	58966;81743	Ramp2;Pde2a
GO:0060463	lung lobe morphogenesis	2	8	0.133525	0.549428	687536;24482	Foxf1;Igf1
GO:0060426	lung vasculature development	2	8	0.133525	0.549428	687536;24482	Foxf1;Igf1
GO:0010544	negative regulation of platelet activation	2	8	0.133525	0.549428	25728;29366	Apoe;Serpine2
GO:0060539	diaphragm development	2	8	0.133525	0.549428	312897;24883	Msc;Wt1
GO:0072608	interleukin-10 secretion	2	8	0.133525	0.549428	499342;500590	Cd274;Tnfrsf9
GO:0033623	regulation of integrin activation	2	8	0.133525	0.549428	498335;25651	Cxcl13;Selp
GO:0060236	regulation of mitotic spindle organization	2	8	0.133525	0.549428	311546;25203	Tpx2;Ccnb1
GO:0070305	response to cGMP	2	8	0.133525	0.549428	25553;81743	Slc6a4;Pde2a
GO:0006670	sphingosine metabolic process	2	8	0.133525	0.549428	313339;170897	Acer2;Sphk1
GO:0043651	linoleic acid metabolic process	2	8	0.133525	0.549428	50549;287424	Cyp4a1;Aloxe3
GO:0071436	sodium ion export	2	8	0.133525	0.549428	24212;24213	Atp1a2;Atp1a3
GO:0051917	regulation of fibrinolysis	2	8	0.133525	0.549428	113936;290757	Cpb2;F11
GO:0071711	basement membrane organization	2	8	0.133525	0.549428	58966;50654	Ramp2;Ctss
GO:0007096	regulation of exit from mitosis	2	8	0.133525	0.549428	64041;296368	Birc5;Ube2c
GO:0023061	signal release	28	318	0.133953	0.549428	289949;81819;170897;25054;684516;64041;25569;25017;60582;24392;353250;81820;29290;24498;360034;314386;289747;24807;29200;25027;26989;59267;24366;24367;25083;58812;366949;65178	Fam3d;Pax8;Sphk1;Ntrk2;Kcnc4;Birc5;Trh;Myo5a;Il1rn;Gja1;Niacr1;Doc2b;Adora1;Il6;Myrip;Gpr68;Osm;Tacr1;Inhba;Slc16a1;Cadps;Syt7;Fgb;Fgg;Adra2a;Apln;Mafa;Snap91
GO:0034109	homotypic cell-cell adhesion	7	59	0.134171	0.549428	406864;116680;24367;24366;29366;310392;25694	Clic1;Ptpru;Fgg;Fgb;Serpine2;Slc7a11;Has2
GO:0050810	regulation of steroid biosynthetic process	7	59	0.134171	0.549428	25728;24482;25557;64191;83791;24493;25427	Apoe;Igf1;Star;Dhcr7;Fdps;Il1a;Cyp51
GO:0006970	response to osmotic stress	7	59	0.134171	0.549428	50676;83731;24778;25383;170913;315215;25256	Slc6a12;Kcnma1;Slc2a1;Apobec1;Abcb1a;Mlc1;Fmo1
GO:0046620	regulation of organ growth	7	59	0.134171	0.549428	24392;155430;54237;83791;24883;25203;25553	Gja1;Hey2;Cdk1;Fdps;Wt1;Ccnb1;Slc6a4
GO:0002791	regulation of peptide secretion	15	154	0.134464	0.549428	360034;289949;81819;24392;314386;24366;24367;25083;59267;64041;81820;58812;25027;29290;25569	Myrip;Fam3d;Pax8;Gja1;Gpr68;Fgb;Fgg;Adra2a;Syt7;Birc5;Doc2b;Apln;Slc16a1;Adora1;Trh
GO:0090183	regulation of kidney development	6	48	0.13518	0.549428	24883;117092;84007;25453;140586;81819	Wt1;Serpinb7;C3ar1;Gdnf;Sox9;Pax8
GO:0055017	cardiac muscle tissue growth	6	48	0.13518	0.549428	24392;155430;54237;29610;83791;25203	Gja1;Hey2;Cdk1;Tgfbr3;Fdps;Ccnb1
GO:0050672	negative regulation of lymphocyte proliferation	6	48	0.13518	0.549428	499342;25350;289211;25704;304988;309304	Cd274;Sftpd;Fcgr2b;Il2ra;Mnda;Pdcd1lg2
GO:0014068	positive regulation of phosphatidylinositol 3-kinase signaling	6	48	0.13518	0.549428	89804;25054;25651;140586;25589;24482	Tek;Ntrk2;Selp;Sox9;Kdr;Igf1
GO:0032945	negative regulation of mononuclear cell proliferation	6	48	0.13518	0.549428	499342;25350;289211;25704;304988;309304	Cd274;Sftpd;Fcgr2b;Il2ra;Mnda;Pdcd1lg2
GO:0051402	neuron apoptotic process	19	204	0.13578	0.549428	117038;24383;117232;25728;25589;113959;25054;24770;25453;25557;64041;24787;63865;25542;65199;83516;24890;24451;364018	Mt3;Gapdh;Barhl1;Apoe;Kdr;C5ar1;Ntrk2;Ccl2;Gdnf;Star;Birc5;Sod2;Lgmn;Ccl3;Kcnip3;Ppargc1a;Esr1;Hmox1;Ncf2
GO:0060292	long term synaptic depression	3	17	0.136127	0.549428	29290;294043;50592	Adora1;Sorcs3;Gria1
GO:0002446	neutrophil mediated immunity	3	17	0.136127	0.549428	60665;301229;24310	Cxcl6;Trem1;Ace
GO:0032967	positive regulation of collagen biosynthetic process	3	17	0.136127	0.549428	24770;113898;117092	Ccl2;Prdx5;Serpinb7
GO:1903514	calcium ion transport from endoplasmic reticulum to cytosol	3	17	0.136127	0.549428	81869;117029;25542	Gstm7;Ccr5;Ccl3
GO:0055069	zinc ion homeostasis	3	17	0.136127	0.549428	306009;117038;689415	Slc39a14;Mt3;Mt2A
GO:0014808	release of sequestered calcium ion into cytosol by sarcoplasmic reticulum	3	17	0.136127	0.549428	81869;117029;25542	Gstm7;Ccr5;Ccl3
GO:0051310	metaphase plate congression	3	17	0.136127	0.549428	684771;25203;500545	Cdca5;Ccnb1;Cdca8
GO:0072215	regulation of metanephros development	3	17	0.136127	0.549428	25453;24883;81819	Gdnf;Wt1;Pax8
GO:0001953	negative regulation of cell-matrix adhesion	3	17	0.136127	0.549428	313339;81707;363060	Acer2;Mmp14;Plet1
GO:0071870	cellular response to catecholamine stimulus	3	17	0.136127	0.549428	25557;60582;24950	Star;Il1rn;Srd5a1
GO:0060317	cardiac epithelial to mesenchymal transition	3	17	0.136127	0.549428	29610;155430;25694	Tgfbr3;Hey2;Has2
GO:0072337	modified amino acid transport	3	17	0.136127	0.549428	171049;80900;293154	Folr1;Slco1a5;Folr2
GO:0071868	cellular response to monoamine stimulus	3	17	0.136127	0.549428	25557;60582;24950	Star;Il1rn;Srd5a1
GO:0042506	tyrosine phosphorylation of Stat5 protein	3	17	0.136127	0.549428	64546;289747;24482	Il12b;Osm;Igf1
GO:0072111	cell proliferation involved in kidney development	3	17	0.136127	0.549428	24883;117092;84007	Wt1;Serpinb7;C3ar1
GO:0046685	response to arsenic-containing substance	4	27	0.138018	0.549994	287526;50592;24451;360772	Serpinf1;Gria1;Hmox1;Zfand2a
GO:0061383	trabecula morphogenesis	4	27	0.138018	0.549994	89804;29610;155430;29393	Tek;Tgfbr3;Hey2;Col1a1
GO:0002287	alpha-beta T cell activation involved in immune response	4	27	0.138018	0.549994	64546;24498;291100;299206	Il12b;Il6;Irf4;Batf
GO:0030901	midbrain development	4	27	0.138018	0.549994	25453;60665;117232;25627	Gdnf;Cxcl6;Barhl1;Cma1
GO:0032508	DNA duplex unwinding	4	27	0.138018	0.549994	29728;360243;499870;291885	Mcm4;Top2a;Rad51;Mcm5
GO:0060740	prostate gland epithelium morphogenesis	4	27	0.138018	0.549994	116640;140586;24890;24482	Tnc;Sox9;Esr1;Igf1
GO:1900372	negative regulation of purine nucleotide biosynthetic process	4	27	0.138018	0.549994	29235;25339;81743;25083	Galr3;Npr3;Pde2a;Adra2a
GO:0034405	response to fluid shear stress	4	27	0.138018	0.549994	25694;24392;364018;24310	Has2;Gja1;Ncf2;Ace
GO:0060043	regulation of cardiac muscle cell proliferation	4	27	0.138018	0.549994	54237;24392;155430;25203	Cdk1;Gja1;Hey2;Ccnb1
GO:0030279	negative regulation of ossification	4	27	0.138018	0.549994	29597;140586;25542;24848	P2ry2;Sox9;Ccl3;Tph1
GO:0010656	negative regulation of muscle cell apoptotic process	4	27	0.138018	0.549994	81680;24451;155430;24482	Lifr;Hmox1;Hey2;Igf1
GO:0032309	icosanoid secretion	4	27	0.138018	0.549994	24310;29597;24493;113976	Ace;P2ry2;Il1a;Acsl4
GO:0035924	cellular response to vascular endothelial growth factor stimulus	4	27	0.138018	0.549994	25589;305253;58966;29186	Kdr;Adamts3;Ramp2;Cd63
GO:0061337	cardiac conduction	4	27	0.138018	0.549994	29571;25349;24392;315611	Scn10a;Scn2b;Gja1;Scn4b
GO:0030809	negative regulation of nucleotide biosynthetic process	4	27	0.138018	0.549994	29235;25339;81743;25083	Galr3;Npr3;Pde2a;Adra2a
GO:0002292	T cell differentiation involved in immune response	4	27	0.138018	0.549994	64546;24498;291100;299206	Il12b;Il6;Irf4;Batf
GO:0006638	neutral lipid metabolic process	8	71	0.138717	0.552341	499264;25330;25728;25086;79223;24232;24890;113976	Apobr;Lipe;Apoe;Cyp2e1;Gk;C3;Esr1;Acsl4
GO:0042692	muscle cell differentiation	23	256	0.141094	0.561361	363790;54237;25203;309760;287129;245920;360579;24251;306748;58966;155430;687536;24883;24482;50672;29455;29452;306636;140586;292301;29437;54410;83791	Fbxo40;Cdk1;Ccnb1;Mypn;Tmem204;Cxcl10;Ccl9;Cd53;Cxcl14;Ramp2;Hey2;Foxf1;Wt1;Igf1;Ednrb;Gdf15;Epas1;Efnb2;Sox9;T;Acta1;Enpp3;Fdps
GO:0042472	inner ear morphogenesis	9	83	0.141324	0.561831	81819;289229;266813;25654;140586;266714;282836;54264;295691	Pax8;Vangl2;Prrx1;Col11a1;Sox9;Myo7a;Cthrc1;Mafb;Frzb
GO:0017156	calcium ion-dependent exocytosis	7	60	0.141983	0.563558	26989;60566;25083;59267;81820;65171;291597	Cadps;Syt8;Adra2a;Syt7;Doc2b;Scamp5;Trim36
GO:1902106	negative regulation of leukocyte differentiation	7	60	0.141983	0.563558	362634;314386;191575;84387;297077;25542;171411	C1qc;Gpr68;Nme1;Pglyrp1;Tmem176a;Ccl3;Tmem176b
GO:0009967	positive regulation of signal transduction	68	851	0.142439	0.56388	114203;25524;679975;498075;305253;24366;24498;364754;116637;25542;290361;24232;360161;24890;310621;245920;24493;60582;24392;360918;266813;84032;192213;81651;29610;24962;29290;25425;113959;24451;29393;64546;305236;89804;25054;89824;287885;65161;289747;25651;311426;170824;25589;29200;301227;81511;29186;289054;361303;24482;83504;117038;691993;361514;289229;448830;296137;24367;60665;25083;81639;64536…	Sh2b2;Psap;Gpr183;Trat1;Adamts3;Fgb;Il6;Fzd8;Ccl4;Ccl3;Dok2;C3;Nek6;Esr1;Iqgap3;Cxcl10;Il1a;Il1rn;Gja1;Pf4;Prrx1;Col3a1;Rasgrf1;Cspg4;Tgfbr3;Cth;Adora1;Ctsh;C5ar1;Hmox1;Col1a1;Il12b;Cxcl11;Tek;Ntrk2;Chi3l1;Sectm1a;Litaf;Osm;Selp;Siglec1;Steap3;Kdr;Inhba;Trem2;Lat;Cd63;Aspm;Lims2;Igf1;Kl;Mt3;Scimp;Meis3;Vangl2;Ly96;Bub1;Fgg;Cxcl6;Adra2a;Alox15;Esm1;Sox9;Tmod2;Muc20;Bid;Ubd;Rasd2
GO:0051147	regulation of muscle cell differentiation	10	95	0.142605	0.56388	245920;29455;687536;360579;306748;24251;306636;140586;83791;54410	Cxcl10;Gdf15;Foxf1;Ccl9;Cxcl14;Cd53;Efnb2;Sox9;Fdps;Enpp3
GO:0050680	negative regulation of epithelial cell proliferation	10	95	0.142605	0.56388	24392;287526;29692;306636;140586;113936;29610;361303;171112;25728	Gja1;Serpinf1;Pla2g2a;Efnb2;Sox9;Cpb2;Tgfbr3;Lims2;Wfdc1;Apoe
GO:0042471	ear morphogenesis	10	95	0.142605	0.56388	81819;289229;84403;266813;25654;140586;266714;282836;54264;295691	Pax8;Vangl2;Gjb6;Prrx1;Col11a1;Sox9;Myo7a;Cthrc1;Mafb;Frzb
GO:1901988	negative regulation of cell cycle phase transition	12	119	0.142625	0.56388	360243;304477;296137;54237;298884;315852;363227;314818;25203;308768;24571;25515	Top2a;Kntc1;Bub1;Cdk1;Gen1;Ttk;Nabp1;E2f7;Ccnb1;Ticrr;Muc1;Plk1
GO:0017157	regulation of exocytosis	11	107	0.142952	0.564727	26989;24366;24367;687536;25316;25083;59267;81820;65171;25017;24451	Cadps;Fgb;Fgg;Foxf1;Ms4a2;Adra2a;Syt7;Doc2b;Scamp5;Myo5a;Hmox1
GO:0048521	negative regulation of behavior	5	38	0.143458	0.565395	498335;29290;25569;24770;29427	Cxcl13;Adora1;Trh;Ccl2;Aif1
GO:0010226	response to lithium ion	5	38	0.143458	0.565395	305509;24599;29437;50592;81651	Adcy1;Nos2;Acta1;Gria1;Cspg4
GO:0035019	somatic stem cell maintenance	5	38	0.143458	0.565395	140586;81819;289229;366126;29692	Sox9;Pax8;Vangl2;Spi1;Pla2g2a
GO:0043436	oxoacid metabolic process	60	744	0.143607	0.565536	25330;29592;25059;302972;58835;24333;497672;83792;246074;81819;24232;307859;59103;316330;302489;114097;60582;170897;286896;24533;25017;690745;304860;81869;295934;24962;24848;311374;24479;24191;58962;25060;287424;79242;89813;311569;170635;140910;25557;498992;54282;24886;29221;24482;113976;24383;83516;50671;171142;296138;50549;29244;266807;81639;81718;24787;293504;287877;171049;680308	Lipe;Bcat1;Hk2;Amdhd2;Phgdh;Eno1;Brca1;Scd;Scd1;Pax8;C3;Chst5;Ptges;Ankrd23;Hs6st2;Ltc4s;Il1rn;Sphk1;Sgpl1;Ldha;Myo5a;Marc1;Npl;Gstm7;Chst1;Cth;Tph1;Duoxa1;Idh1;Aldoc;Hpgds;Hk3;Aloxe3;Hpgd;Pdk4;Acss2;Dhrs9;Msmo1;Star;Vnn3;Padi1;Tbxas1;Arg1;Igf1;Acsl4;Gapdh;Ppargc1a;Fasn;Lbp;Acoxl;Cyp4a1;Gch1;Duox1;Alox15;Cdo1;Sod2;Qprt;Pycr1;Folr1;Mthfd2
GO:0051223	regulation of protein transport	28	321	0.143721	0.565541	499342;64557;170897;500590;54237;24498;113901;25542;24493;306071;81743;305355;498840;89804;303666;308099;65161;117029;100360977;60350;24482;25572;117254;24366;24367;679787;65171;65178	Cd274;Bard1;Sphk1;Tnfrsf9;Cdk1;Il6;Chia;Ccl3;Il1a;Lcp1;Pde2a;Tlr10;Tmem173;Tek;RGD1561778;Fndc1;Litaf;Ccr5;LOC100360977;Cd14;Igf1;Tnfrsf4;Prdx1;Fgb;Fgg;Clec5a;Scamp5;Snap91
GO:0032835	glomerulus development	6	49	0.14395	0.565999	85497;117092;84007;289229;24883;363265	Klf15;Serpinb7;C3ar1;Vangl2;Wt1;Col4a3
GO:0006261	DNA-dependent DNA replication	8	72	0.145945	0.573395	360243;291885;29728;288079;314818;308768;499870;313108	Top2a;Mcm5;Mcm4;Polq;E2f7;Ticrr;Rad51;Mms22l
GO:0071496	cellular response to external stimulus	21	232	0.146755	0.576127	114097;116640;24392;170897;24778;24533;89813;79129;116649;24950;24212;29393;140586;81743;29427;24773;170496;24599;24451;308100;81687	Ltc4s;Tnc;Gja1;Sphk1;Slc2a1;Ldha;Pdk4;Cyba;Kcnj4;Srd5a1;Atp1a2;Col1a1;Sox9;Pde2a;Aif1;Sftpa1;Lcn2;Nos2;Hmox1;Acat2;Mmp9
GO:0071774	response to fibroblast growth factor	9	84	0.148054	0.578593	498335;116640;83504;367166;304334;25557;364648;24770;29393	Cxcl13;Tnc;Kl;Hyal1;Fam20c;Star;Shcbp1;Ccl2;Col1a1
GO:0044724	single-organism carbohydrate catabolic process	10	96	0.148906	0.578593	24191;25060;24383;83516;25059;24533;24333;79223;282838;24482	Aldoc;Hk3;Gapdh;Ppargc1a;Hk2;Ldha;Eno1;Gk;Gm2a;Igf1
GO:0007613	memory	10	96	0.148906	0.578593	60582;287526;25054;24807;24213;25553;305509;50592;294043;24482	Il1rn;Serpinf1;Ntrk2;Tacr1;Atp1a3;Slc6a4;Adcy1;Gria1;Sorcs3;Igf1
GO:0042110	T cell activation	25	284	0.149726	0.578593	362076;499342;25350;24832;25704;24498;364754;688090;25033;306071;353218;299206;29427;54264;64546;64545;56822;291100;361226;81511;24770;24482;25572;83781;309304	Il36b;Cd274;Sftpd;Thy1;Il2ra;Il6;Fzd8;RT1-Bb;Sstr1;Lcp1;Tnfsf9;Batf;Aif1;Mafb;Il12b;Icos;Cd86;Irf4;Cd83;Lat;Ccl2;Igf1;Tnfrsf4;Lgals3;Pdcd1lg2
GO:0014066	regulation of phosphatidylinositol 3-kinase signaling	7	61	0.150008	0.578593	89804;25054;25651;140586;29366;25589;24482	Tek;Ntrk2;Selp;Sox9;Serpine2;Kdr;Igf1
GO:0003401	axis elongation	4	28	0.150144	0.578593	116640;140586;24890;289229	Tnc;Sox9;Esr1;Vangl2
GO:0044253	positive regulation of multicellular organismal metabolic process	4	28	0.150144	0.578593	298282;113898;117092;24770	Oma1;Prdx5;Serpinb7;Ccl2
GO:0030042	actin filament depolymerization	4	28	0.150144	0.578593	316521;297339;24171;296654	Vil1;Capg;Add2;Gsn
GO:0070661	leukocyte proliferation	18	195	0.150949	0.578593	64546;499342;353218;25350;56822;289211;83781;25339;24807;25704;24498;679975;304988;29427;291675;24482;25572;309304	Il12b;Cd274;Tnfsf9;Sftpd;Cd86;Fcgr2b;Lgals3;Npr3;Tacr1;Il2ra;Il6;Gpr183;Mnda;Aif1;Mzb1;Igf1;Tnfrsf4;Pdcd1lg2
GO:0051875	pigment granule localization	3	18	0.151587	0.578593	266714;25017;501162	Myo7a;Myo5a;Mreg
GO:0014048	regulation of glutamate secretion	3	18	0.151587	0.578593	29290;25569;60582	Adora1;Trh;Il1rn
GO:0008210	estrogen metabolic process	3	18	0.151587	0.578593	83783;25557;286896	Sult1a1;Star;Sgpl1
GO:0071451	cellular response to superoxide	3	18	0.151587	0.578593	117254;117038;24787	Prdx1;Mt3;Sod2
GO:1901031	regulation of response to reactive oxygen species	3	18	0.151587	0.578593	24464;25524;287877	Hp;Psap;Pycr1
GO:0071364	cellular response to epidermal growth factor stimulus	3	18	0.151587	0.578593	140586;316521;29393	Sox9;Vil1;Col1a1
GO:0010714	positive regulation of collagen metabolic process	3	18	0.151587	0.578593	24770;113898;117092	Ccl2;Prdx5;Serpinb7
GO:0061384	heart trabecula morphogenesis	3	18	0.151587	0.578593	89804;29610;155430	Tek;Tgfbr3;Hey2
GO:0044364	disruption of cells of other organism	3	18	0.151587	0.578593	60665;301229;117029	Cxcl6;Trem1;Ccr5
GO:0038084	vascular endothelial growth factor signaling pathway	3	18	0.151587	0.578593	25589;305253;29186	Kdr;Adamts3;Cd63
GO:0010893	positive regulation of steroid biosynthetic process	3	18	0.151587	0.578593	24493;24482;83791	Il1a;Igf1;Fdps
GO:2000404	regulation of T cell migration	3	18	0.151587	0.578593	498335;245920;29427	Cxcl13;Cxcl10;Aif1
GO:0071450	cellular response to oxygen radical	3	18	0.151587	0.578593	117254;117038;24787	Prdx1;Mt3;Sod2
GO:0031640	killing of cells of other organism	3	18	0.151587	0.578593	60665;301229;117029	Cxcl6;Trem1;Ccr5
GO:0060045	positive regulation of cardiac muscle cell proliferation	3	18	0.151587	0.578593	54237;25203;155430	Cdk1;Ccnb1;Hey2
GO:0071354	cellular response to interleukin-6	3	18	0.151587	0.578593	24498;24770;24795	Il6;Ccl2;Serpina3n
GO:0006911	phagocytosis, engulfment	3	18	0.151587	0.578593	81639;29427;289211	Alox15;Aif1;Fcgr2b
GO:0016042	lipid catabolic process	19	208	0.152523	0.578593	297694;361527;294422;25728;171142;314360;291437;286896;25330;362619;117038;25629;282838;690625;296138;25083;29290;29692;353250	Plbd1;Pld3;Smpdl3a;Apoe;Lbp;Galc;Lipg;Sgpl1;Lipe;Smpdl3b;Mt3;Plin1;Gm2a;Oc90;Acoxl;Adra2a;Adora1;Pla2g2a;Niacr1
GO:0070664	negative regulation of leukocyte proliferation	6	50	0.152972	0.578593	499342;25350;289211;25704;304988;309304	Cd274;Sftpd;Fcgr2b;Il2ra;Mnda;Pdcd1lg2
GO:0060840	artery development	6	50	0.152972	0.578593	79242;155430;266813;84032;687536;25728	Hpgd;Hey2;Prrx1;Col3a1;Foxf1;Apoe
GO:0033555	multicellular organismal response to stress	8	73	0.153353	0.578593	24392;24807;29244;289747;25732;25083;65199;50672	Gja1;Tacr1;Gch1;Osm;Acp5;Adra2a;Kcnip3;Ednrb
GO:0050886	endocrine process	8	73	0.153353	0.578593	353250;289596;79129;24807;54242;29200;100360872;58812	Niacr1;Corin;Cyba;Tacr1;Cpa3;Inhba;Mcpt1l1;Apln
GO:0001763	morphogenesis of a branching structure	17	183	0.15364	0.578593	24498;116640;25154;366126;252929;687536;24883;289229;25453;140586;498997;25589;81819;24890;24482;81707;25425	Il6;Tnc;Pgr;Spi1;Ctsz;Foxf1;Wt1;Vangl2;Gdnf;Sox9;Rspo3;Kdr;Pax8;Esr1;Igf1;Mmp14;Ctsh
GO:0030048	actin filament-based movement	5	39	0.153781	0.578593	266714;24212;316521;117558;25017	Myo7a;Atp1a2;Vil1;Mylk2;Myo5a
GO:0090102	cochlea development	5	39	0.153781	0.578593	282836;140586;289229;155430;295691	Cthrc1;Sox9;Vangl2;Hey2;Frzb
GO:0030855	epithelial cell differentiation	37	442	0.154254	0.578593	170568;85497;25524;81819;25154;25589;311723;54237;24493;24890;24571;501162;24392;25017;295691;81743;83731;24191;155430;315190;304334;687536;25453;314818;497979;29186;304815;64057;310392;24482;24883;50672;83781;50692;140586;266714;316521	Dmbt1;Klf15;Psap;Pax8;Pgr;Kdr;Sox18;Cdk1;Il1a;Esr1;Muc1;Mreg;Gja1;Myo5a;Frzb;Pde2a;Kcnma1;Aldoc;Hey2;Upk3a;Fam20c;Foxf1;Gdnf;E2f7;Tmem100;Cd63;Elf3;Hapln2;Slc7a11;Igf1;Wt1;Ednrb;Lgals3;Plaur;Sox9;Myo7a;Vil1
GO:0032886	regulation of microtubule-based process	11	109	0.154927	0.578593	84510;311546;291441;315298;310344;114482;311325;306575;117524;25203;298884	Stmn2;Tpx2;Ska1;Racgap1;Plk4;Nek2;Knstrn;Ckap2;Ccnf;Ccnb1;Gen1
GO:0030799	regulation of cyclic nucleotide metabolic process	11	109	0.154927	0.578593	245920;305236;58966;25339;299242;25083;81743;29235;360918;24599;25728	Cxcl10;Cxcl11;Ramp2;Npr3;Gpr65;Adra2a;Pde2a;Galr3;Pf4;Nos2;Apoe
GO:0072006	nephron development	9	85	0.154941	0.578593	24883;85497;117092;289229;84007;25453;140586;363265;81819	Wt1;Klf15;Serpinb7;Vangl2;C3ar1;Gdnf;Sox9;Col4a3;Pax8
GO:0001935	endothelial cell proliferation	9	85	0.154941	0.578593	89804;24392;79129;24770;25589;29221;24599;81707;25728	Tek;Gja1;Cyba;Ccl2;Kdr;Arg1;Nos2;Mmp14;Apoe
GO:0022612	gland morphogenesis	10	97	0.155345	0.578593	116640;25154;24498;140586;691657;304815;29221;24890;24482;295691	Tnc;Pgr;Il6;Sox9;Crip1;Elf3;Arg1;Esr1;Igf1;Frzb
GO:0001894	tissue homeostasis	14	146	0.156004	0.578593	24476;25350;89813;25732;29452;25046;117254;140586;245977;25589;29175;113898;50654;25425	Iapp;Sftpd;Pdk4;Acp5;Epas1;Pigr;Prdx1;Sox9;Gpr116;Kdr;Ctsk;Prdx5;Ctss;Ctsh
GO:0060049	regulation of protein glycosylation	2	9	0.156479	0.578593	313339;117038	Acer2;Mt3
GO:0060406	positive regulation of penile erection	2	9	0.156479	0.578593	29597;50672	P2ry2;Ednrb
GO:0072576	liver morphogenesis	2	9	0.156479	0.578593	361303;113936	Lims2;Cpb2
GO:0070672	response to interleukin-15	2	9	0.156479	0.578593	25704;113976	Il2ra;Acsl4
GO:0035646	endosome to melanosome transport	2	9	0.156479	0.578593	365042;29186	Rab32;Cd63
GO:0060073	micturition	2	9	0.156479	0.578593	24807;83731	Tacr1;Kcnma1
GO:0090026	positive regulation of monocyte chemotaxis	2	9	0.156479	0.578593	29427;24770	Aif1;Ccl2
GO:0021924	cell proliferation in external granule layer	2	9	0.156479	0.578593	24482;25553	Igf1;Slc6a4
GO:0051044	positive regulation of membrane protein ectodomain proteolysis	2	9	0.156479	0.578593	25728;25083	Apoe;Adra2a
GO:0060143	positive regulation of syncytium formation by plasma membrane fusion	2	9	0.156479	0.578593	29455;24251	Gdf15;Cd53
GO:0036003	positive regulation of transcription from RNA polymerase II promoter in response to stress	2	9	0.156479	0.578593	117038;24571	Mt3;Muc1
GO:0032836	glomerular basement membrane development	2	9	0.156479	0.578593	24883;363265	Wt1;Col4a3
GO:0006312	mitotic recombination	2	9	0.156479	0.578593	360243;298884	Top2a;Gen1
GO:0002827	positive regulation of T-helper 1 type immune response	2	9	0.156479	0.578593	64546;688090	Il12b;RT1-Bb
GO:0042789	mRNA transcription from RNA polymerase II promoter	2	9	0.156479	0.578593	113959;311723	C5ar1;Sox18
GO:0086012	membrane depolarization during cardiac muscle cell action potential	2	9	0.156479	0.578593	315611;25349	Scn4b;Scn2b
GO:0006534	cysteine metabolic process	2	9	0.156479	0.578593	81718;24962	Cdo1;Cth
GO:0007076	mitotic chromosome condensation	2	9	0.156479	0.578593	311336;684771	Nusap1;Cdca5
GO:0043922	negative regulation by host of viral transcription	2	9	0.156479	0.578593	116637;25542	Ccl4;Ccl3
GO:0051570	regulation of histone H3-K9 methylation	2	9	0.156479	0.578593	680522;497672	Hist1h1b;Brca1
GO:0021930	cerebellar granule cell precursor proliferation	2	9	0.156479	0.578593	24482;25553	Igf1;Slc6a4
GO:1903206	negative regulation of hydrogen peroxide-induced cell death	2	9	0.156479	0.578593	25524;287877	Psap;Pycr1
GO:0048484	enteric nervous system development	2	9	0.156479	0.578593	25453;50672	Gdnf;Ednrb
GO:0003337	mesenchymal to epithelial transition involved in metanephros morphogenesis	2	9	0.156479	0.578593	25453;81819	Gdnf;Pax8
GO:0010755	regulation of plasminogen activation	2	9	0.156479	0.578593	113936;29366	Cpb2;Serpine2
GO:0042953	lipoprotein transport	2	9	0.156479	0.578593	498638;25383	Msr1;Apobec1
GO:0042747	circadian sleep/wake cycle, REM sleep	2	9	0.156479	0.578593	25557;24950	Star;Srd5a1
GO:0010310	regulation of hydrogen peroxide metabolic process	2	9	0.156479	0.578593	24464;100363502	Hp;LOC100363502
GO:0009396	folic acid-containing compound biosynthetic process	2	9	0.156479	0.578593	29244;680308	Gch1;Mthfd2
GO:0001840	neural plate development	2	9	0.156479	0.578593	292301;289229	T;Vangl2
GO:0043482	cellular pigment accumulation	2	9	0.156479	0.578593	365042;29186	Rab32;Cd63
GO:0043485	endosome to pigment granule transport	2	9	0.156479	0.578593	365042;29186	Rab32;Cd63
GO:0021546	rhombomere development	2	9	0.156479	0.578593	54264;114090	Mafb;Egr2
GO:0002579	positive regulation of antigen processing and presentation	2	9	0.156479	0.578593	301227;688090	Trem2;RT1-Bb
GO:0045188	regulation of circadian sleep/wake cycle, non-REM sleep	2	9	0.156479	0.578593	24498;29290	Il6;Adora1
GO:0014832	urinary bladder smooth muscle contraction	2	9	0.156479	0.578593	24807;83731	Tacr1;Kcnma1
GO:0050855	regulation of B cell receptor signaling pathway	2	9	0.156479	0.578593	293783;685692	Lpxn;Gcsam
GO:0048757	pigment granule maturation	2	9	0.156479	0.578593	365042;29186	Rab32;Cd63
GO:0051093	negative regulation of developmental process	45	549	0.156915	0.579779	362634;25728;299210;298282;24832;24498;84387;25542;81819;100912290;295691;245920;24392;25553;315691;360579;29692;24476;292406;306748;29610;363265;54264;361244;89804;680097;314386;117029;24883;24787;191575;24770;289054;100360950;310395;83620;117038;50672;366126;287526;289229;360918;140586;297077;171411	C1qc;Apoe;Esrrb;Oma1;Thy1;Il6;Pglyrp1;Ccl3;Pax8;LOC100912290;Frzb;Cxcl10;Gja1;Slc6a4;Lingo1;Ccl9;Pla2g2a;Iapp;Thbs2;Cxcl14;Tgfbr3;Col4a3;Mafb;RGD1307443;Tek;LOC680097;Gpr68;Ccr5;Wt1;Sod2;Nme1;Ccl2;Aspm;LOC100360950;Ccr4;Cit;Mt3;Ednrb;Spi1;Serpinf1;Vangl2;Pf4;Sox9;Tmem176a;Tmem176b
GO:0043244	regulation of protein complex disassembly	7	62	0.15824	0.583814	24171;84510;306575;296654;297339;25203;316521	Add2;Stmn2;Ckap2;Gsn;Capg;Ccnb1;Vil1
GO:0051897	positive regulation of protein kinase B signaling	7	62	0.15824	0.583814	89804;361514;89824;24498;25542;171099;24482	Tek;Meis3;Chi3l1;Il6;Ccl3;Rasd2;Igf1
GO:0006066	alcohol metabolic process	22	248	0.159704	0.588504	25330;25728;170897;140868;362619;117038;83791;365345;25427;29230;81726;313339;29637;83731;58949;140910;25557;64191;89784;79223;314438;294422	Lipe;Apoe;Sphk1;Fabp5;Smpdl3b;Mt3;Fdps;Cyb5r2;Cyp51;Sqle;Mvd;Acer2;Hmgcs1;Kcnma1;Ptafr;Msmo1;Star;Dhcr7;Idi1;Gk;Degs2;Smpdl3a
GO:2001236	regulation of extrinsic apoptotic signaling pathway	12	122	0.159745	0.588504	24366;24367;83781;311426;24451;25453;29200;497672;64625;360918;24482;25572	Fgb;Fgg;Lgals3;Siglec1;Hmox1;Gdnf;Inhba;Brca1;Bid;Pf4;Igf1;Tnfrsf4
GO:0002520	immune system development	52	644	0.1606	0.590785	362076;498335;362634;292060;25704;24498;364754;499204;84387;25542;680097;24232;688090;100912290;25033;353218;691857;286896;29610;81743;54264;64546;501854;89804;64545;360243;56822;314386;304334;291100;25732;191575;361226;29200;301227;100360950;299206;361537;24171;364396;84007;366126;679975;287818;29452;360918;24787;679787;297077;25589;29168;171411	Il36b;Cxcl13;C1qc;Irf8;Il2ra;Il6;Fzd8;Ddias;Pglyrp1;Ccl3;LOC680097;C3;RT1-Bb;LOC100912290;Sstr1;Tnfsf9;Pygo1;Sgpl1;Tgfbr3;Pde2a;Mafb;Il12b;Rab7b;Tek;Icos;Top2a;Cd86;Gpr68;Fam20c;Irf4;Acp5;Nme1;Cd83;Inhba;Trem2;LOC100360950;Batf;Tyrobp;Add2;Arl11;C3ar1;Spi1;Gpr183;Cd300lf;Epas1;Pf4;Sod2;Clec5a;Tmem176a;Kdr;Ubd;Tmem176b
GO:2000241	regulation of reproductive process	8	74	0.160936	0.590785	29597;50672;116510;287526;29200;24883;140586;24890	P2ry2;Ednrb;Timp1;Serpinf1;Inhba;Wt1;Sox9;Esr1
GO:0043623	cellular protein complex assembly	27	313	0.160987	0.590785	500377;689399;29213;297339;26989;246118;79129;315298;296368;54227;29610;298850;29427;84510;294269;100909441;50665;24171;300218;307351;24366;24367;291081;296654;81639;316521;65178	Tuba8;Cenpw;Tubb4a;Capg;Cadps;Tubb3;Cyba;Racgap1;Ube2c;Arpc1b;Tgfbr3;Cenpa;Aif1;Stmn2;RT1-Da;LOC100909441;Tmsb10;Add2;Tuba1c;Tubb6;Fgb;Fgg;Tubb2b;Gsn;Alox15;Vil1;Snap91
GO:0048634	regulation of muscle organ development	11	110	0.1611	0.590785	245920;306636;24392;155430;360579;54237;306748;24498;140586;83791;25203	Cxcl10;Efnb2;Gja1;Hey2;Ccl9;Cdk1;Cxcl14;Il6;Sox9;Fdps;Ccnb1
GO:1901861	regulation of muscle tissue development	11	110	0.1611	0.590785	245920;83516;24392;155430;360579;54237;306748;306636;140586;83791;25203	Cxcl10;Ppargc1a;Gja1;Hey2;Ccl9;Cdk1;Cxcl14;Efnb2;Sox9;Fdps;Ccnb1
GO:0002440	production of molecular mediator of immune response	11	110	0.1611	0.590785	291675;89804;289211;25335;171569;24498;299206;301229;688090;24451;25572	Mzb1;Tek;Fcgr2b;Mmp7;Spon2;Il6;Batf;Trem1;RT1-Bb;Hmox1;Tnfrsf4
GO:0043583	ear development	16	172	0.161187	0.590785	289229;25654;155430;84403;266813;29687;306748;140586;304988;83731;266714;282836;81819;54264;24482;295691	Vangl2;Col11a1;Hey2;Gjb6;Prrx1;C1qb;Cxcl14;Sox9;Mnda;Kcnma1;Myo7a;Cthrc1;Pax8;Mafb;Igf1;Frzb
GO:0045776	negative regulation of blood pressure	6	51	0.162237	0.593766	29244;293118;24787;58812;29290;24599	Gch1;Prcp;Sod2;Apln;Adora1;Nos2
GO:0042490	mechanoreceptor differentiation	6	51	0.162237	0.593766	155430;289229;25054;83731;266714;282836	Hey2;Vangl2;Ntrk2;Kcnma1;Myo7a;Cthrc1
GO:0032392	DNA geometric change	4	29	0.162658	0.594441	29728;360243;499870;291885	Mcm4;Top2a;Rad51;Mcm5
GO:0007616	long-term memory	4	29	0.162658	0.594441	305509;24807;25054;50592	Adcy1;Tacr1;Ntrk2;Gria1
GO:0048856	anatomical structure development	272	3687	0.16362	0.597524	29597;85497;81819;298282;79431;29599;24498;289054;84387;361232;679975;24493;100912290;310621;245920;50719;25349;24392;29465;246118;315691;292935;24251;304988;680097;29610;114482;83731;306071;84492;498335;78960;89804;360243;58966;80900;314386;191573;291100;191575;25453;304913;24787;311723;298504;100360950;25694;311374;83620;312897;50672;289229;50568;29687;287818;29452;294071;306636;24464;81707;299…	P2ry2;Klf15;Pax8;Oma1;Bhlhe40;Atp2b3;Il6;Aspm;Pglyrp1;Pak1ip1;Gpr183;Il1a;LOC100912290;Iqgap3;Cxcl10;Slc7a5;Scn2b;Gja1;Trpv2;Tubb3;Lingo1;Htatip2;Cd53;Mnda;LOC680097;Tgfbr3;Nek2;Kcnma1;Lcp1;Tec;Cxcl13;Prx;Tek;Top2a;Ramp2;Slco1a5;Gpr68;Grin3a;Irf4;Nme1;Gdnf;Tnn;Sod2;Sox18;Mfsd2a;LOC100360950;Has2;Duoxa1;Cit;Msc;Ednrb;Vangl2;Cspg5;C1qb;Cd300lf;Epas1;Hells;Efnb2;Hp;Mmp14;Batf;Kdr;T;Gdf15;Sh2b2;Nnmt;…
GO:0007169	transmembrane receptor protein tyrosine kinase signaling pathway	29	340	0.164224	0.599291	114203;89813;25054;305253;117038;290361;24890;287129;83504;286896;140586;63865;292699;29290;89804;304334;25046;25589;29186;364648;24770;24482;679942;25083;306636;64536;81651;303886;316521	Sh2b2;Pdk4;Ntrk2;Adamts3;Mt3;Dok2;Esr1;Tmem204;Kl;Sgpl1;Sox9;Lgmn;Cblc;Adora1;Tek;Fam20c;Pigr;Kdr;Cd63;Shcbp1;Ccl2;Igf1;Angptl1;Adra2a;Efnb2;Esm1;Cspg4;Muc20;Vil1
GO:0031503	protein complex localization	5	40	0.1644	0.599501	117254;65161;64041;308064;170897	Prdx1;Litaf;Birc5;Cep72;Sphk1
GO:0048469	cell maturation	12	123	0.165674	0.603174	24392;25154;292206;304334;311723;81651;29452;25334;25203;83731;25589;50672	Gja1;Pgr;Trip13;Fam20c;Sox18;Cspg4;Epas1;Bhlha15;Ccnb1;Kcnma1;Kdr;Ednrb
GO:0060348	bone development	12	123	0.165674	0.603174	89804;298185;25732;24950;24482;140586;25589;292301;24890;25694;81707;29393	Tek;Frem1;Acp5;Srd5a1;Igf1;Sox9;Kdr;T;Esr1;Has2;Mmp14;Col1a1
GO:0000165	MAPK cascade	41	499	0.165981	0.603174	25524;25728;290326;25054;24498;364754;25542;24232;24493;24890;117038;310621;60582;83504;81651;306811;292699;29290;25425;89804;117558;56765;311406;89824;113959;289747;117029;25589;301227;24770;24482;117254;691993;289229;679975;24366;24367;25083;81639;140586;303886	Psap;Apoe;Pbk;Ntrk2;Il6;Fzd8;Ccl3;C3;Il1a;Esr1;Mt3;Iqgap3;Il1rn;Kl;Cspg4;Wnk2;Cblc;Adora1;Ctsh;Tek;Mylk2;Plvap;Dusp2;Chi3l1;C5ar1;Osm;Ccr5;Kdr;Trem2;Ccl2;Igf1;Prdx1;Scimp;Vangl2;Gpr183;Fgb;Fgg;Adra2a;Alox15;Sox9;Muc20
GO:0007173	epidermal growth factor receptor signaling pathway	7	63	0.166672	0.603174	25046;25083;140586;292699;29290;316521;24890	Pigr;Adra2a;Sox9;Cblc;Adora1;Vil1;Esr1
GO:0045637	regulation of myeloid cell differentiation	14	148	0.16673	0.603174	64546;501854;362634;366126;314386;191575;360918;29200;361537;100360950;25542;680097;54264;100912290	Il12b;Rab7b;C1qc;Spi1;Gpr68;Nme1;Pf4;Inhba;Tyrobp;LOC100360950;Ccl3;LOC680097;Mafb;LOC100912290
GO:0032880	regulation of protein localization	36	433	0.167083	0.603174	499342;64557;170897;500590;54237;114482;24498;113901;25203;25542;24493;306071;29440;315298;311325;81743;305355;679787;498840;89804;684771;303666;308099;65161;117029;301227;100360977;60350;24482;25572;117254;24366;24367;309523;65171;65178	Cd274;Bard1;Sphk1;Tnfrsf9;Cdk1;Nek2;Il6;Chia;Ccnb1;Ccl3;Il1a;Lcp1;Slc26a4;Racgap1;Knstrn;Pde2a;Tlr10;Clec5a;Tmem173;Tek;Cdca5;RGD1561778;Fndc1;Litaf;Ccr5;Trem2;LOC100360977;Cd14;Igf1;Tnfrsf4;Prdx1;Fgb;Fgg;Kif20b;Scamp5;Snap91
GO:0051293	establishment of spindle localization	3	19	0.167568	0.603174	311336;298850;301701	Nusap1;Cenpa;Ndc80
GO:0045920	negative regulation of exocytosis	3	19	0.167568	0.603174	687536;24451;25083	Foxf1;Hmox1;Adra2a
GO:0043368	positive T cell selection	3	19	0.167568	0.603174	24498;291100;299206	Il6;Irf4;Batf
GO:0002438	acute inflammatory response to antigenic stimulus	3	19	0.167568	0.603174	24614;24232;289211	Orm1;C3;Fcgr2b
GO:0043304	regulation of mast cell degranulation	3	19	0.167568	0.603174	687536;24451;25316	Foxf1;Hmox1;Ms4a2
GO:0061377	mammary gland lobule development	3	19	0.167568	0.603174	687536;24890;24848	Foxf1;Esr1;Tph1
GO:0042403	thyroid hormone metabolic process	3	19	0.167568	0.603174	266807;81819;311374	Duox1;Pax8;Duoxa1
GO:0060602	branch elongation of an epithelium	3	19	0.167568	0.603174	116640;140586;24890	Tnc;Sox9;Esr1
GO:0060749	mammary gland alveolus development	3	19	0.167568	0.603174	687536;24890;24848	Foxf1;Esr1;Tph1
GO:0051354	negative regulation of oxidoreductase activity	3	19	0.167568	0.603174	117038;24464;113898	Mt3;Hp;Prdx5
GO:0034122	negative regulation of toll-like receptor signaling pathway	3	19	0.167568	0.603174	501854;291100;499926	Rab7b;Irf4;Bpifb1
GO:0001976	neurological system process involved in regulation of systemic arterial blood pressure	3	19	0.167568	0.603174	25364;24787;24807	Asic2;Sod2;Tacr1
GO:0050920	regulation of chemotaxis	10	99	0.16863	0.60656	498335;245920;84007;287561;24770;306636;116637;25542;25589;29427	Cxcl13;Cxcl10;C3ar1;Ccl7;Ccl2;Efnb2;Ccl4;Ccl3;Kdr;Aif1
GO:0015758	glucose transport	9	87	0.16917	0.60807	291675;85497;25059;140868;301518;24778;24232;24890;24482	Mzb1;Klf15;Hk2;Fabp5;Prkag3;Slc2a1;C3;Esr1;Igf1
GO:0042098	T cell proliferation	12	124	0.171711	0.616759	64546;499342;353218;25350;56822;83781;25704;24498;29427;24482;25572;309304	Il12b;Cd274;Tnfsf9;Sftpd;Cd86;Lgals3;Il2ra;Il6;Aif1;Igf1;Tnfrsf4;Pdcd1lg2
GO:0046661	male sex differentiation	14	149	0.17223	0.617742	24883;286896;25589;24950;25453;25557;140586;29637;83791;289054;29200;24890;81707;24310	Wt1;Sgpl1;Kdr;Srd5a1;Gdnf;Star;Sox9;Hmgcs1;Fdps;Aspm;Inhba;Esr1;Mmp14;Ace
GO:0090276	regulation of peptide hormone secretion	14	149	0.17223	0.617742	360034;289949;81819;24392;314386;24366;24367;25083;59267;64041;81820;58812;25027;25569	Myrip;Fam3d;Pax8;Gja1;Gpr68;Fgb;Fgg;Adra2a;Syt7;Birc5;Doc2b;Apln;Slc16a1;Trh
GO:0031589	cell-substrate adhesion	17	187	0.172806	0.619364	81639;89804;687536;298185;24366;24367;84032;362800;24832;363060;313339;304913;60379;29186;25589;81707;29393	Alox15;Tek;Foxf1;Frem1;Fgb;Fgg;Col3a1;Itgb8;Thy1;Plet1;Acer2;Tnn;Col5a3;Cd63;Kdr;Mmp14;Col1a1
GO:0045595	regulation of cell differentiation	84	1084	0.174034	0.623323	362076;29597;362634;25728;406864;299210;360918;25054;64515;25704;24498;60665;304988;84387;25542;81819;498638;29692;117258;100912290;295691;58966;245920;353218;24392;25553;29465;316842;315691;84032;360579;81651;170897;24251;24476;306748;170568;29610;304334;24310;54264;29393;64546;501854;84510;680097;297077;155430;314386;24832;687536;117029;361226;25557;29200;497979;191575;100360950;29366;289054;24…	Il36b;P2ry2;C1qc;Apoe;Clic1;Esrrb;Pf4;Ntrk2;Cdc20;Il2ra;Il6;Cxcl6;Mnda;Pglyrp1;Ccl3;Pax8;Msr1;Pla2g2a;Cntn1;LOC100912290;Frzb;Ramp2;Cxcl10;Tnfsf9;Gja1;Slc6a4;Trpv2;Metrnl;Lingo1;Col3a1;Ccl9;Cspg4;Sphk1;Cd53;Iapp;Cxcl14;Dmbt1;Tgfbr3;Fam20c;Ace;Mafb;Col1a1;Il12b;Rab7b;Stmn2;LOC680097;Tmem176a;Hey2;Gpr68;Thy1;Foxf1;Ccr5;Cd83;Star;Inhba;Tmem100;Nme1;LOC100360950;Serpine2;Aspm;Tph1;Ccr4;Igf1;Duoxa1;Ci…
GO:0035710	CD4-positive, alpha-beta T cell activation	5	41	0.175301	0.624549	361226;64546;291100;299206;24498	Cd83;Il12b;Irf4;Batf;Il6
GO:0046164	alcohol catabolic process	5	41	0.175301	0.624549	117038;294422;25728;79223;362619	Mt3;Smpdl3a;Apoe;Gk;Smpdl3b
GO:0030199	collagen fibril organization	4	30	0.175532	0.624549	25654;84032;81682;29393	Col11a1;Col3a1;Lum;Col1a1
GO:0051955	regulation of amino acid transport	4	30	0.175532	0.624549	29290;25569;60582;29221	Adora1;Trh;Il1rn;Arg1
GO:1900543	negative regulation of purine nucleotide metabolic process	4	30	0.175532	0.624549	29235;25339;81743;25083	Galr3;Npr3;Pde2a;Adra2a
GO:0032651	regulation of interleukin-1 beta production	4	30	0.175532	0.624549	25732;170897;117029;25542	Acp5;Sphk1;Ccr5;Ccl3
GO:0019752	carboxylic acid metabolic process	56	704	0.17606	0.624549	25330;29592;25059;302972;58835;24333;497672;83792;246074;81819;24232;25017;59103;316330;114097;60582;170897;286896;24533;293504;304860;81869;24962;24848;311374;24479;24191;58962;25060;287424;79242;89813;311569;170635;140910;25557;498992;54282;24886;29221;24482;113976;24383;83516;50671;171142;296138;50549;29244;266807;81639;81718;24787;287877;171049;680308	Lipe;Bcat1;Hk2;Amdhd2;Phgdh;Eno1;Brca1;Scd;Scd1;Pax8;C3;Myo5a;Ptges;Ankrd23;Ltc4s;Il1rn;Sphk1;Sgpl1;Ldha;Qprt;Npl;Gstm7;Cth;Tph1;Duoxa1;Idh1;Aldoc;Hpgds;Hk3;Aloxe3;Hpgd;Pdk4;Acss2;Dhrs9;Msmo1;Star;Vnn3;Padi1;Tbxas1;Arg1;Igf1;Acsl4;Gapdh;Ppargc1a;Fasn;Lbp;Acoxl;Cyp4a1;Gch1;Duox1;Alox15;Cdo1;Sod2;Pycr1;Folr1;Mthfd2
GO:0007292	female gamete generation	8	76	0.176611	0.624549	79242;25154;292206;29200;25203;84397;289054;304608	Hpgd;Pgr;Trip13;Inhba;Ccnb1;Tnfaip6;Aspm;Mmp19
GO:0046717	acid secretion	8	76	0.176611	0.624549	29597;60582;25054;24310;29290;25569;24493;113976	P2ry2;Il1rn;Ntrk2;Ace;Adora1;Trh;Il1a;Acsl4
GO:0051651	maintenance of location in cell	8	76	0.176611	0.624549	25728;315298;311325;114482;311327;25203;301701;289054	Apoe;Racgap1;Knstrn;Nek2;Casc5;Ccnb1;Ndc80;Aspm
GO:0033043	regulation of organelle organization	47	583	0.176737	0.624549	171576;298282;64515;64625;296654;311325;117524;297339;25203;114482;360161;24571;306575;24493;50665;680522;315298;310344;296368;54227;81820;89804;684771;84510;311546;289747;24807;299242;311336;25383;298884;360621;24482;25515;83620;24171;83516;289229;366126;296137;291441;64041;81639;497672;309523;316521;305827	Bub1b;Oma1;Cdc20;Bid;Gsn;Knstrn;Ccnf;Capg;Ccnb1;Nek2;Nek6;Muc1;Ckap2;Il1a;Tmsb10;Hist1h1b;Racgap1;Plk4;Ube2c;Arpc1b;Doc2b;Tek;Cdca5;Stmn2;Tpx2;Osm;Tacr1;Gpr65;Nusap1;Apobec1;Gen1;Cdc6;Igf1;Plk1;Cit;Add2;Ppargc1a;Vangl2;Spi1;Bub1;Ska1;Birc5;Alox15;Brca1;Kif20b;Vil1;Wdhd1
GO:0032943	mononuclear cell proliferation	17	188	0.177781	0.624549	64546;499342;353218;25350;56822;289211;83781;24807;25704;24498;679975;304988;29427;291675;24482;25572;309304	Il12b;Cd274;Tnfsf9;Sftpd;Cd86;Fcgr2b;Lgals3;Tacr1;Il2ra;Il6;Gpr183;Mnda;Aif1;Mzb1;Igf1;Tnfrsf4;Pdcd1lg2
GO:0046651	lymphocyte proliferation	17	188	0.177781	0.624549	64546;499342;353218;25350;56822;289211;83781;24807;25704;24498;679975;304988;29427;291675;24482;25572;309304	Il12b;Cd274;Tnfsf9;Sftpd;Cd86;Fcgr2b;Lgals3;Tacr1;Il2ra;Il6;Gpr183;Mnda;Aif1;Mzb1;Igf1;Tnfrsf4;Pdcd1lg2
GO:0045321	leukocyte activation	40	490	0.178935	0.624549	362076;499342;317676;25350;297666;24832;25316;25704;24498;364754;64545;84387;25542;688090;25033;291675;306071;353218;289211;304988;299206;29427;54264;24451;64546;687536;56822;291100;24807;361226;81511;24770;24482;25572;361537;366126;679975;83781;29168;309304	Il36b;Cd274;Lat2;Sftpd;Klra5;Thy1;Ms4a2;Il2ra;Il6;Fzd8;Icos;Pglyrp1;Ccl3;RT1-Bb;Sstr1;Mzb1;Lcp1;Tnfsf9;Fcgr2b;Mnda;Batf;Aif1;Mafb;Hmox1;Il12b;Foxf1;Cd86;Irf4;Tacr1;Cd83;Lat;Ccl2;Igf1;Tnfrsf4;Tyrobp;Spi1;Gpr183;Lgals3;Ubd;Pdcd1lg2
GO:0046479	glycosphingolipid catabolic process	2	10	0.180094	0.624549	282838;314360	Gm2a;Galc
GO:0032308	positive regulation of prostaglandin secretion	2	10	0.180094	0.624549	29597;24493	P2ry2;Il1a
GO:0042748	circadian sleep/wake cycle, non-REM sleep	2	10	0.180094	0.624549	24498;29290	Il6;Adora1
GO:0003188	heart valve formation	2	10	0.180094	0.624549	140586;155430	Sox9;Hey2
GO:0014848	urinary tract smooth muscle contraction	2	10	0.180094	0.624549	24807;83731	Tacr1;Kcnma1
GO:0032376	positive regulation of cholesterol transport	2	10	0.180094	0.624549	291437;25728	Lipg;Apoe
GO:0007063	regulation of sister chromatid cohesion	2	10	0.180094	0.624549	296137;684771	Bub1;Cdca5
GO:0070472	regulation of uterine smooth muscle contraction	2	10	0.180094	0.624549	24807;25083	Tacr1;Adra2a
GO:0048012	hepatocyte growth factor receptor signaling pathway	2	10	0.180094	0.624549	303886;64536	Muc20;Esm1
GO:0071732	cellular response to nitric oxide	2	10	0.180094	0.624549	117038;24773	Mt3;Sftpa1
GO:0051383	kinetochore organization	2	10	0.180094	0.624549	298850;689399	Cenpa;Cenpw
GO:0035988	chondrocyte proliferation	2	10	0.180094	0.624549	81707;29143	Mmp14;Grn
GO:0097090	presynaptic membrane organization	2	10	0.180094	0.624549	362235;25728	Syndig1;Apoe
GO:0032373	positive regulation of sterol transport	2	10	0.180094	0.624549	291437;25728	Lipg;Apoe
GO:0002864	regulation of acute inflammatory response to antigenic stimulus	2	10	0.180094	0.624549	24232;289211	C3;Fcgr2b
GO:0030213	hyaluronan biosynthetic process	2	10	0.180094	0.624549	367166;25694	Hyal1;Has2
GO:0006684	sphingomyelin metabolic process	2	10	0.180094	0.624549	294422;362619	Smpdl3a;Smpdl3b
GO:0070257	positive regulation of mucus secretion	2	10	0.180094	0.624549	29597;79129	P2ry2;Cyba
GO:0051782	negative regulation of cell division	2	10	0.180094	0.624549	289054;314818	Aspm;E2f7
GO:0060767	epithelial cell proliferation involved in prostate gland development	2	10	0.180094	0.624549	140586;287526	Sox9;Serpinf1
GO:0035584	calcium-mediated signaling using intracellular calcium source	2	10	0.180094	0.624549	25589;25054	Kdr;Ntrk2
GO:0045346	regulation of MHC class II biosynthetic process	2	10	0.180094	0.624549	366126;360918	Spi1;Pf4
GO:0038093	Fc receptor signaling pathway	2	10	0.180094	0.624549	25316;25046	Ms4a2;Pigr
GO:0071872	cellular response to epinephrine stimulus	2	10	0.180094	0.624549	25557;24950	Star;Srd5a1
GO:0051873	killing by host of symbiont cells	2	10	0.180094	0.624549	60665;301229	Cxcl6;Trem1
GO:0002862	negative regulation of inflammatory response to antigenic stimulus	2	10	0.180094	0.624549	64546;289211	Il12b;Fcgr2b
GO:0002674	negative regulation of acute inflammatory response	2	10	0.180094	0.624549	29290;289211	Adora1;Fcgr2b
GO:0070208	protein heterotrimerization	2	10	0.180094	0.624549	315114;29393	C1qtnf6;Col1a1
GO:0060525	prostate glandular acinus development	2	10	0.180094	0.624549	24890;24482	Esr1;Igf1
GO:0043476	pigment accumulation	2	10	0.180094	0.624549	365042;29186	Rab32;Cd63
GO:0051852	disruption by host of symbiont cells	2	10	0.180094	0.624549	60665;301229	Cxcl6;Trem1
GO:1901863	positive regulation of muscle tissue development	2	10	0.180094	0.624549	83516;24392	Ppargc1a;Gja1
GO:0043279	response to alkaloid	13	138	0.181024	0.62691	24212;50592;25154;81869;24807;499870;24498;25557;170913;29427;310392;24451;81687	Atp1a2;Gria1;Pgr;Gstm7;Tacr1;Rad51;Il6;Star;Abcb1a;Aif1;Slc7a11;Hmox1;Mmp9
GO:0048167	regulation of synaptic plasticity	13	138	0.181024	0.62691	29366;117558;50592;192213;25054;64515;79431;25557;114090;25589;29290;294043;81687	Serpine2;Mylk2;Gria1;Rasgrf1;Ntrk2;Cdc20;Bhlhe40;Star;Egr2;Kdr;Adora1;Sorcs3;Mmp9
GO:0035094	response to nicotine	6	53	0.181457	0.627112	24807;24212;25557;310392;24451;81687	Tacr1;Atp1a2;Star;Slc7a11;Hmox1;Mmp9
GO:0014904	myotube cell development	6	53	0.181457	0.627112	245920;360579;306748;140586;29437;24482	Cxcl10;Ccl9;Cxcl14;Sox9;Acta1;Igf1
GO:0051279	regulation of release of sequestered calcium ion into cytosol	6	53	0.181457	0.627112	245920;305236;79129;24832;25316;81869	Cxcl10;Cxcl11;Cyba;Thy1;Ms4a2;Gstm7
GO:0071363	cellular response to growth factor stimulus	30	358	0.181632	0.627287	25728;170897;25054;24950;117038;287129;83504;84032;29610;81743;24770;29393;498335;305253;84510;50592;58966;304334;25557;497979;364648;29186;29221;25694;311827;79242;367166;140586;25589;316521	Apoe;Sphk1;Ntrk2;Srd5a1;Mt3;Tmem204;Kl;Col3a1;Tgfbr3;Pde2a;Ccl2;Col1a1;Cxcl13;Adamts3;Stmn2;Gria1;Ramp2;Fam20c;Star;Tmem100;Shcbp1;Cd63;Arg1;Has2;Adamtsl2;Hpgd;Hyal1;Sox9;Kdr;Vil1
GO:0002695	negative regulation of leukocyte activation	10	101	0.182435	0.628494	499342;25350;289211;83781;687536;25704;304988;84387;24451;309304	Cd274;Sftpd;Fcgr2b;Lgals3;Foxf1;Il2ra;Mnda;Pglyrp1;Hmox1;Pdcd1lg2
GO:0045089	positive regulation of innate immune response	10	101	0.182435	0.628494	64546;501854;361689;56822;305355;291100;58949;84387;499926;498840	Il12b;Rab7b;Unc93b1;Cd86;Tlr10;Irf4;Ptafr;Pglyrp1;Bpifb1;Tmem173
GO:0007163	establishment or maintenance of cell polarity	9	89	0.183983	0.628494	89804;171529;301701;289229;687536;309523;298850;65178;24482	Tek;Kif2c;Ndc80;Vangl2;Foxf1;Kif20b;Cenpa;Snap91;Igf1
GO:0050856	regulation of T cell receptor signaling pathway	3	20	0.184009	0.628494	83781;498075;24832	Lgals3;Trat1;Thy1
GO:0043489	RNA stabilization	3	20	0.184009	0.628494	25453;310395;25383	Gdnf;Ccr4;Apobec1
GO:0033006	regulation of mast cell activation involved in immune response	3	20	0.184009	0.628494	687536;24451;25316	Foxf1;Hmox1;Ms4a2
GO:0048255	mRNA stabilization	3	20	0.184009	0.628494	25453;310395;25383	Gdnf;Ccr4;Apobec1
GO:0051180	vitamin transport	3	20	0.184009	0.628494	24778;171049;293154	Slc2a1;Folr1;Folr2
GO:0045742	positive regulation of epidermal growth factor receptor signaling pathway	3	20	0.184009	0.628494	29290;24890;25083	Adora1;Esr1;Adra2a
GO:0002675	positive regulation of acute inflammatory response	3	20	0.184009	0.628494	24498;24232;117029	Il6;C3;Ccr5
GO:0043576	regulation of respiratory gaseous exchange	3	20	0.184009	0.628494	24212;29290;58812	Atp1a2;Adora1;Apln
GO:0090190	positive regulation of branching involved in ureteric bud morphogenesis	3	20	0.184009	0.628494	25453;140586;81819	Gdnf;Sox9;Pax8
GO:0002861	regulation of inflammatory response to antigenic stimulus	3	20	0.184009	0.628494	64546;24232;289211	Il12b;C3;Fcgr2b
GO:0007176	regulation of epidermal growth factor-activated receptor activity	3	20	0.184009	0.628494	29290;292699;25083	Adora1;Cblc;Adra2a
GO:1901186	positive regulation of ERBB signaling pathway	3	20	0.184009	0.628494	29290;24890;25083	Adora1;Esr1;Adra2a
GO:0010863	positive regulation of phospholipase C activity	3	20	0.184009	0.628494	25544;24890;25316	Sele;Esr1;Ms4a2
GO:0001824	blastocyst development	7	65	0.184108	0.628494	170568;299210;114482;499914;29610;29143;304815	Dmbt1;Esrrb;Nek2;Gins1;Tgfbr3;Grn;Elf3
GO:0090277	positive regulation of peptide hormone secretion	8	77	0.184692	0.628777	360034;24392;314386;24366;24367;81820;58812;25569	Myrip;Gja1;Gpr68;Fgb;Fgg;Doc2b;Apln;Trh
GO:0019218	regulation of steroid metabolic process	8	77	0.184692	0.628777	25728;25427;25557;64191;83791;83731;24493;24482	Apoe;Cyp51;Star;Dhcr7;Fdps;Kcnma1;Il1a;Igf1
GO:0019882	antigen processing and presentation	8	77	0.184692	0.628777	365042;361689;289211;294269;24988;301227;290644;688090	Rab32;Unc93b1;Fcgr2b;RT1-Da;RT1-M2;Trem2;Ifi30;RT1-Bb
GO:0051494	negative regulation of cytoskeleton organization	8	77	0.184692	0.628777	24171;84510;50665;306575;296654;297339;25203;316521	Add2;Stmn2;Tmsb10;Ckap2;Gsn;Capg;Ccnb1;Vil1
GO:0051493	regulation of cytoskeleton organization	23	267	0.185005	0.629417	114482;311325;296654;297339;25203;306575;50665;315298;310344;54227;89804;84510;311546;24807;299242;298884;83620;24171;289229;291441;117524;81639;316521	Nek2;Knstrn;Gsn;Capg;Ccnb1;Ckap2;Tmsb10;Racgap1;Plk4;Arpc1b;Tek;Stmn2;Tpx2;Tacr1;Gpr65;Gen1;Cit;Add2;Vangl2;Ska1;Ccnf;Alox15;Vil1
GO:0046649	lymphocyte activation	34	412	0.185233	0.629768	362076;499342;317676;25350;297666;24832;25704;24498;364754;84387;688090;25033;291675;306071;353218;289211;304988;299206;29427;54264;64546;64545;56822;291100;24807;361226;81511;24770;24482;25572;366126;679975;83781;309304	Il36b;Cd274;Lat2;Sftpd;Klra5;Thy1;Il2ra;Il6;Fzd8;Pglyrp1;RT1-Bb;Sstr1;Mzb1;Lcp1;Tnfsf9;Fcgr2b;Mnda;Batf;Aif1;Mafb;Il12b;Icos;Cd86;Irf4;Tacr1;Cd83;Lat;Ccl2;Igf1;Tnfrsf4;Spi1;Gpr183;Lgals3;Pdcd1lg2
GO:0034622	cellular macromolecular complex assembly	42	519	0.18579	0.631233	500377;689399;304648;29213;297339;25448;100360950;100912290;26989;246118;680522;79129;315298;296368;54227;29610;298850;29427;288242;291145;84510;680097;294071;155430;294269;100909441;310395;50665;24171;361416;288272;300218;307351;24366;24367;291081;296654;81639;140586;65178;316521;291159	Tuba8;Cenpw;Asf1b;Tubb4a;Capg;Cenpi;LOC100360950;LOC100912290;Cadps;Tubb3;Hist1h1b;Cyba;Racgap1;Ube2c;Arpc1b;Tgfbr3;Cenpa;Aif1;Chaf1b;Hist1h1a;Stmn2;LOC680097;Hells;Hey2;RT1-Da;LOC100909441;Ccr4;Tmsb10;Add2;Cenpn;Mis18a;Tuba1c;Tubb6;Fgb;Fgg;Tubb2b;Gsn;Alox15;Sox9;Snap91;Vil1;Hist1h2ail
GO:0070206	protein trimerization	5	42	0.186467	0.6314	29221;315114;170496;500590;29393	Arg1;C1qtnf6;Lcn2;Tnfrsf9;Col1a1
GO:1901184	regulation of ERBB signaling pathway	5	42	0.186467	0.6314	29290;292699;24890;63865;25083	Adora1;Cblc;Esr1;Lgmn;Adra2a
GO:0070527	platelet aggregation	5	42	0.186467	0.6314	24366;24367;310392;406864;29366	Fgb;Fgg;Slc7a11;Clic1;Serpine2
GO:0030219	megakaryocyte differentiation	5	42	0.186467	0.6314	501854;680097;100912290;100360950;360918	Rab7b;LOC680097;LOC100912290;LOC100360950;Pf4
GO:0060443	mammary gland morphogenesis	5	42	0.186467	0.6314	29221;24890;25154;295691;304815	Arg1;Esr1;Pgr;Frzb;Elf3
GO:0006259	DNA metabolic process	52	654	0.186729	0.631861	300795;291137;289777;24834;54237;64557;24498;304648;497672;25203;316129;680097;308768;100912290;293502;24392;291885;29728;140586;288079;499914;84007;360847;288242;311336;291145;684771;360243;294071;500987;191575;363227;24883;314818;25383;298884;307126;100360950;24482;299206;286894;83516;288272;366126;292206;25083;362720;100363502;680522;291159;499870;313108	Ns5atp9;Gmnn;Fignl1;Tk1;Cdk1;Bard1;Il6;Asf1b;Brca1;Ccnb1;Uhrf1;LOC680097;Ticrr;LOC100912290;Kif22;Gja1;Mcm5;Mcm4;Sox9;Polq;Gins1;C3ar1;Ube2t;Chaf1b;Nusap1;Hist1h1a;Cdca5;Top2a;Hells;H2afx;Nme1;Nabp1;Wt1;E2f7;Apobec1;Gen1;Mcm10;LOC100360950;Igf1;Batf;Parm1;Ppargc1a;Mis18a;Spi1;Trip13;Adra2a;Rrm2;LOC100363502;Hist1h1b;Hist1h2ail;Rad51;Mms22l
GO:0043900	regulation of multi-organism process	17	190	0.187947	0.63481	64546;29597;360243;292060;448830;25542;116510;60665;117029;25704;689388;116637;29200;246074;100360977;498840;50672	Il12b;P2ry2;Top2a;Irf8;Ly96;Ccl3;Timp1;Cxcl6;Ccr5;Il2ra;Ptx3;Ccl4;Inhba;Scd1;LOC100360977;Tmem173;Ednrb
GO:0048534	hematopoietic or lymphoid organ development	49	614	0.188183	0.63481	362076;498335;362634;292060;25704;24498;364754;499204;84387;25542;680097;688090;100912290;25033;353218;691857;286896;29610;81743;54264;64546;501854;89804;360243;56822;314386;304334;291100;25732;191575;361226;29200;301227;100360950;299206;361537;24171;364396;366126;679975;287818;29452;360918;24787;679787;297077;25589;29168;171411	Il36b;Cxcl13;C1qc;Irf8;Il2ra;Il6;Fzd8;Ddias;Pglyrp1;Ccl3;LOC680097;RT1-Bb;LOC100912290;Sstr1;Tnfsf9;Pygo1;Sgpl1;Tgfbr3;Pde2a;Mafb;Il12b;Rab7b;Tek;Top2a;Cd86;Gpr68;Fam20c;Irf4;Acp5;Nme1;Cd83;Inhba;Trem2;LOC100360950;Batf;Tyrobp;Add2;Arl11;Spi1;Gpr183;Cd300lf;Epas1;Pf4;Sod2;Clec5a;Tmem176a;Kdr;Ubd;Tmem176b
GO:0045661	regulation of myoblast differentiation	4	31	0.188738	0.63481	245920;140586;360579;306748	Cxcl10;Sox9;Ccl9;Cxcl14
GO:1902099	regulation of metaphase/anaphase transition of cell cycle	4	31	0.188738	0.63481	360161;360621;298884;25515	Nek6;Cdc6;Gen1;Plk1
GO:0002762	negative regulation of myeloid leukocyte differentiation	4	31	0.188738	0.63481	25542;362634;191575;314386	Ccl3;C1qc;Nme1;Gpr68
GO:0030071	regulation of mitotic metaphase/anaphase transition	4	31	0.188738	0.63481	360161;360621;298884;25515	Nek6;Cdc6;Gen1;Plk1
GO:0071715	icosanoid transport	4	31	0.188738	0.63481	24310;29597;24493;113976	Ace;P2ry2;Il1a;Acsl4
GO:1902305	regulation of sodium ion transmembrane transport	4	31	0.188738	0.63481	315611;29639;306811;25349	Scn4b;Fxyd2;Wnk2;Scn2b
GO:1901571	fatty acid derivative transport	4	31	0.188738	0.63481	24310;29597;24493;113976	Ace;P2ry2;Il1a;Acsl4
GO:0001501	skeletal system development	28	334	0.190655	0.640831	25339;24950;81682;24890;295691;81687;114587;298185;286896;266813;84032;25694;315615;304334;116510;81707;29393;89804;25654;362800;25732;24482;83781;315341;367166;140586;25589;292301	Npr3;Srd5a1;Lum;Esr1;Frzb;Mmp9;Dlk1;Frem1;Sgpl1;Prrx1;Col3a1;Has2;Dscaml1;Fam20c;Timp1;Mmp14;Col1a1;Tek;Col11a1;Itgb8;Acp5;Igf1;Lgals3;Hoxc5;Hyal1;Sox9;Kdr;T
GO:0010830	regulation of myotube differentiation	6	54	0.191391	0.642707	245920;29455;360579;306748;24251;140586	Cxcl10;Gdf15;Ccl9;Cxcl14;Cd53;Sox9
GO:0030814	regulation of cAMP metabolic process	9	90	0.191597	0.642707	245920;305236;58966;25339;299242;25083;81743;29235;360918	Cxcl10;Cxcl11;Ramp2;Npr3;Gpr65;Adra2a;Pde2a;Galr3;Pf4
GO:0008645	hexose transport	9	90	0.191597	0.642707	291675;85497;25059;140868;301518;24778;24232;24890;24482	Mzb1;Klf15;Hk2;Fabp5;Prkag3;Slc2a1;C3;Esr1;Igf1
GO:2000377	regulation of reactive oxygen species metabolic process	8	78	0.192927	0.645179	79129;25732;293118;117038;24464;497672;100363502;311374	Cyba;Acp5;Prcp;Mt3;Hp;Brca1;LOC100363502;Duoxa1
GO:0006939	smooth muscle contraction	8	78	0.192927	0.645179	24212;50672;170897;24807;25083;25453;83731;29290	Atp1a2;Ednrb;Sphk1;Tacr1;Adra2a;Gdnf;Kcnma1;Adora1
GO:0051153	regulation of striated muscle cell differentiation	8	78	0.192927	0.645179	245920;29455;360579;306748;24251;306636;140586;83791	Cxcl10;Gdf15;Ccl9;Cxcl14;Cd53;Efnb2;Sox9;Fdps
GO:0046916	cellular transition metal ion homeostasis	7	66	0.193098	0.645179	306009;100360087;117038;689415;100362384;29292;113910	Slc39a14;LOC100360087;Mt3;Mt2A;LOC100362384;Ftl1;Prnd
GO:0030316	osteoclast differentiation	7	66	0.193098	0.645179	64546;361537;314386;304334;287818;25732;25542	Il12b;Tyrobp;Gpr68;Fam20c;Cd300lf;Acp5;Ccl3
GO:0010001	glial cell differentiation	13	140	0.193104	0.645179	85497;25728;192262;315691;25054;58835;296654;117038;140586;689415;114090;29366;24482	Klf15;Apoe;C1s;Lingo1;Ntrk2;Phgdh;Gsn;Mt3;Sox9;Mt2A;Egr2;Serpine2;Igf1
GO:0006643	membrane lipid metabolic process	11	115	0.19372	0.646807	287424;170897;286896;362800;362619;313339;25524;314438;294422;314360;282838	Aloxe3;Sphk1;Sgpl1;Itgb8;Smpdl3b;Acer2;Psap;Degs2;Smpdl3a;Galc;Gm2a
GO:0048513	organ development	183	2469	0.196511	0.648572	85497;81819;29599;24498;679975;84387;24493;100912290;310621;245920;24392;286896;311167;304988;29610;83731;306071;54264;498335;89804;360243;58966;80900;314386;291100;191575;25453;29200;24787;311723;289054;100360950;25694;312897;50672;289229;29687;287818;29452;81639;24464;81707;25589;292301;300691;362634;25059;24834;25054;54237;25425;315615;364754;117524;365377;25448;83791;680097;688090;117258;3066…	Klf15;Pax8;Atp2b3;Il6;Gpr183;Pglyrp1;Il1a;LOC100912290;Iqgap3;Cxcl10;Gja1;Sgpl1;Smtnl1;Mnda;Tgfbr3;Kcnma1;Lcp1;Mafb;Cxcl13;Tek;Top2a;Ramp2;Slco1a5;Gpr68;Irf4;Nme1;Gdnf;Inhba;Sod2;Sox18;Aspm;LOC100360950;Has2;Msc;Ednrb;Vangl2;C1qb;Cd300lf;Epas1;Alox15;Hp;Mmp14;Kdr;T;Nnmt;C1qc;Hk2;Tk1;Ntrk2;Cdk1;Ctsh;Dscaml1;Fzd8;Ccnf;Trim72;Cenpi;Fdps;LOC680097;RT1-Bb;Cntn1;Efnb2;Serpinb7;Pygo1;Hist1h1b;Col3a1;Bdh…
GO:0043903	regulation of symbiosis, encompassing mutualism through parasitism	10	103	0.196736	0.648572	64546;360243;292060;25542;60665;117029;689388;116637;246074;100360977	Il12b;Top2a;Irf8;Ccl3;Cxcl6;Ccr5;Ptx3;Ccl4;Scd1;LOC100360977
GO:0051592	response to calcium ion	10	103	0.196736	0.648572	81639;24366;24367;288589;25653;24498;25383;83731;59267;59103	Alox15;Fgb;Fgg;Rasa4;Tshb;Il6;Apobec1;Kcnma1;Syt7;Ptges
GO:0014896	muscle hypertrophy	5	43	0.197881	0.648572	85497;79129;24482;155430;83791	Klf15;Cyba;Igf1;Hey2;Fdps
GO:0044070	regulation of anion transport	9	91	0.199344	0.648572	29597;60582;25728;406864;29221;29290;25569;24493;113976	P2ry2;Il1rn;Apoe;Clic1;Arg1;Adora1;Trh;Il1a;Acsl4
GO:2000178	negative regulation of neural precursor cell proliferation	3	21	0.20085	0.648572	361303;25553;117029	Lims2;Slc6a4;Ccr5
GO:0060009	Sertoli cell development	3	21	0.20085	0.648572	24883;140586;24890	Wt1;Sox9;Esr1
GO:0070296	sarcoplasmic reticulum calcium ion transport	3	21	0.20085	0.648572	81869;117029;25542	Gstm7;Ccr5;Ccl3
GO:0042749	regulation of circadian sleep/wake cycle	3	21	0.20085	0.648572	24498;29290;84387	Il6;Adora1;Pglyrp1
GO:0097237	cellular response to toxic substance	3	21	0.20085	0.648572	25557;691657;170913	Star;Crip1;Abcb1a
GO:0003071	renal system process involved in regulation of systemic arterial blood pressure	3	21	0.20085	0.648572	29290;79129;24392	Adora1;Cyba;Gja1
GO:0051653	spindle localization	3	21	0.20085	0.648572	311336;298850;301701	Nusap1;Cenpa;Ndc80
GO:0001504	neurotransmitter uptake	3	21	0.20085	0.648572	25453;24212;25553	Gdnf;Atp1a2;Slc6a4
GO:0045187	regulation of circadian sleep/wake cycle, sleep	3	21	0.20085	0.648572	24498;29290;84387	Il6;Adora1;Pglyrp1
GO:0001580	detection of chemical stimulus involved in sensory perception of bitter taste	3	21	0.20085	0.648572	287610;365901;25046	Lpo;Gnat2;Pigr
GO:0000303	response to superoxide	3	21	0.20085	0.648572	117254;117038;24787	Prdx1;Mt3;Sod2
GO:0030318	melanocyte differentiation	3	21	0.20085	0.648572	25017;50672;501162	Myo5a;Ednrb;Mreg
GO:0072012	glomerulus vasculature development	3	21	0.20085	0.648572	24883;117092;84007	Wt1;Serpinb7;C3ar1
GO:0043624	cellular protein complex disassembly	8	79	0.201312	0.648572	24171;84510;171529;306575;296654;297339;25203;316521	Add2;Stmn2;Kif2c;Ckap2;Gsn;Capg;Ccnb1;Vil1
GO:0044344	cellular response to fibroblast growth factor stimulus	8	79	0.201312	0.648572	498335;83504;367166;304334;25557;364648;24770;29393	Cxcl13;Kl;Hyal1;Fam20c;Star;Shcbp1;Ccl2;Col1a1
GO:0045833	negative regulation of lipid metabolic process	6	55	0.201526	0.648572	25728;353250;25083;497672;29290;24890	Apoe;Niacr1;Adra2a;Brca1;Adora1;Esr1
GO:0007422	peripheral nervous system development	6	55	0.201526	0.648572	25054;50672;289747;25453;114090;64057	Ntrk2;Ednrb;Osm;Gdnf;Egr2;Hapln2
GO:0001541	ovarian follicle development	6	55	0.201526	0.648572	29200;25448;25589;24890;304608;81707	Inhba;Cenpi;Kdr;Esr1;Mmp19;Mmp14
GO:0042755	eating behavior	4	32	0.202246	0.648572	24476;25569;24807;24310	Iapp;Trh;Tacr1;Ace
GO:0051148	negative regulation of muscle cell differentiation	4	32	0.202246	0.648572	245920;140586;360579;306748	Cxcl10;Sox9;Ccl9;Cxcl14
GO:0072028	nephron morphogenesis	4	32	0.202246	0.648572	25453;24883;140586;81819	Gdnf;Wt1;Sox9;Pax8
GO:0060541	respiratory system development	17	193	0.203714	0.648572	24883;116640;289229;252929;89824;687536;29452;25350;312897;140586;64191;25589;29221;25425;24482;81707;24310	Wt1;Tnc;Vangl2;Ctsz;Chi3l1;Foxf1;Epas1;Sftpd;Msc;Sox9;Dhcr7;Kdr;Arg1;Ctsh;Igf1;Mmp14;Ace
GO:0046887	positive regulation of hormone secretion	10	104	0.204063	0.648572	360034;24392;353250;314386;24366;24367;24807;81820;58812;25569	Myrip;Gja1;Niacr1;Gpr68;Fgb;Fgg;Tacr1;Doc2b;Apln;Trh
GO:0033194	response to hydroperoxide	2	11	0.204187	0.648572	29427;499204	Aif1;Ddias
GO:0044320	cellular response to leptin stimulus	2	11	0.204187	0.648572	117038;24366	Mt3;Fgb
GO:0006883	cellular sodium ion homeostasis	2	11	0.204187	0.648572	24212;24213	Atp1a2;Atp1a3
GO:0001542	ovulation from ovarian follicle	2	11	0.204187	0.648572	304608;25154	Mmp19;Pgr
GO:0034143	regulation of toll-like receptor 4 signaling pathway	2	11	0.204187	0.648572	501854;499926	Rab7b;Bpifb1
GO:0051023	regulation of immunoglobulin secretion	2	11	0.204187	0.648572	24498;25572	Il6;Tnfrsf4
GO:0042249	establishment of planar polarity of embryonic epithelium	2	11	0.204187	0.648572	282836;289229	Cthrc1;Vangl2
GO:0043501	skeletal muscle adaptation	2	11	0.204187	0.648572	29437;140939	Acta1;Trim63
GO:0001573	ganglioside metabolic process	2	11	0.204187	0.648572	362800;282838	Itgb8;Gm2a
GO:0003299	muscle hypertrophy in response to stress	2	11	0.204187	0.648572	85497;155430	Klf15;Hey2
GO:1903205	regulation of hydrogen peroxide-induced cell death	2	11	0.204187	0.648572	25524;287877	Psap;Pycr1
GO:0019377	glycolipid catabolic process	2	11	0.204187	0.648572	282838;314360	Gm2a;Galc
GO:0034433	steroid esterification	2	11	0.204187	0.648572	25728;246074	Apoe;Scd1
GO:2000505	regulation of energy homeostasis	2	11	0.204187	0.648572	316842;83516	Metrnl;Ppargc1a
GO:0070365	hepatocyte differentiation	2	11	0.204187	0.648572	314818;295691	E2f7;Frzb
GO:0036474	cell death in response to hydrogen peroxide	2	11	0.204187	0.648572	25524;287877	Psap;Pycr1
GO:0034391	regulation of smooth muscle cell apoptotic process	2	11	0.204187	0.648572	64546;24482	Il12b;Igf1
GO:0014012	peripheral nervous system axon regeneration	2	11	0.204187	0.648572	116640;25728	Tnc;Apoe
GO:0070471	uterine smooth muscle contraction	2	11	0.204187	0.648572	24807;25083	Tacr1;Adra2a
GO:0097094	craniofacial suture morphogenesis	2	11	0.204187	0.648572	298185;81707	Frem1;Mmp14
GO:0034390	smooth muscle cell apoptotic process	2	11	0.204187	0.648572	64546;24482	Il12b;Igf1
GO:0034434	sterol esterification	2	11	0.204187	0.648572	25728;246074	Apoe;Scd1
GO:0090224	regulation of spindle organization	2	11	0.204187	0.648572	311546;25203	Tpx2;Ccnb1
GO:0006085	acetyl-CoA biosynthetic process	2	11	0.204187	0.648572	311569;89813	Acss2;Pdk4
GO:0034505	tooth mineralization	2	11	0.204187	0.648572	304334;29393	Fam20c;Col1a1
GO:0050716	positive regulation of interleukin-1 secretion	2	11	0.204187	0.648572	117029;25542	Ccr5;Ccl3
GO:0001867	complement activation, lectin pathway	2	11	0.204187	0.648572	100911545;295703	LOC100911545;Serping1
GO:0006266	DNA ligation	2	11	0.204187	0.648572	360243;499870	Top2a;Rad51
GO:0060707	trophoblast giant cell differentiation	2	11	0.204187	0.648572	314818;310344	E2f7;Plk4
GO:0014898	cardiac muscle hypertrophy in response to stress	2	11	0.204187	0.648572	85497;155430	Klf15;Hey2
GO:0001780	neutrophil homeostasis	2	11	0.204187	0.648572	24498;353250	Il6;Niacr1
GO:0045741	positive regulation of epidermal growth factor-activated receptor activity	2	11	0.204187	0.648572	29290;25083	Adora1;Adra2a
GO:0045342	MHC class II biosynthetic process	2	11	0.204187	0.648572	366126;360918	Spi1;Pf4
GO:0060977	coronary vasculature morphogenesis	2	11	0.204187	0.648572	155430;24310	Hey2;Ace
GO:0072283	metanephric renal vesicle morphogenesis	2	11	0.204187	0.648572	25453;81819	Gdnf;Pax8
GO:0060442	branching involved in prostate gland morphogenesis	2	11	0.204187	0.648572	24890;24482	Esr1;Igf1
GO:0035313	wound healing, spreading of epidermal cells	2	11	0.204187	0.648572	117033;363060	Mmp12;Plet1
GO:0002087	regulation of respiratory gaseous exchange by neurological system process	2	11	0.204187	0.648572	24212;29290	Atp1a2;Adora1
GO:0035067	negative regulation of histone acetylation	2	11	0.204187	0.648572	497672;366126	Brca1;Spi1
GO:0003157	endocardium development	2	11	0.204187	0.648572	25589;311723	Kdr;Sox18
GO:0051290	protein heterotetramerization	2	11	0.204187	0.648572	24191;362720	Aldoc;Rrm2
GO:0090177	establishment of planar polarity involved in neural tube closure	2	11	0.204187	0.648572	282836;289229	Cthrc1;Vangl2
GO:0060405	regulation of penile erection	2	11	0.204187	0.648572	29597;50672	P2ry2;Ednrb
GO:0002016	regulation of blood volume by renin-angiotensin	2	11	0.204187	0.648572	79129;24807	Cyba;Tacr1
GO:0034435	cholesterol esterification	2	11	0.204187	0.648572	25728;246074	Apoe;Scd1
GO:0046514	ceramide catabolic process	2	11	0.204187	0.648572	282838;314360	Gm2a;Galc
GO:0050718	positive regulation of interleukin-1 beta secretion	2	11	0.204187	0.648572	117029;25542	Ccr5;Ccl3
GO:0072173	metanephric tubule morphogenesis	2	11	0.204187	0.648572	140586;81819	Sox9;Pax8
GO:0021683	cerebellar granular layer morphogenesis	2	11	0.204187	0.648572	360243;29366	Top2a;Serpine2
GO:0045597	positive regulation of cell differentiation	42	525	0.204609	0.649501	362076;498638;81819;25728;406864;170568;25054;25704;24498;83791;25542;295691;24310;353218;24392;29465;304988;316842;24848;29393;64546;501854;58966;314386;304334;117029;361226;25557;29200;497979;29366;289054;310395;24482;311374;25453;287526;360918;306636;140586;25589;282836	Il36b;Msr1;Pax8;Apoe;Clic1;Dmbt1;Ntrk2;Il2ra;Il6;Fdps;Ccl3;Frzb;Ace;Tnfsf9;Gja1;Trpv2;Mnda;Metrnl;Tph1;Col1a1;Il12b;Rab7b;Ramp2;Gpr68;Fam20c;Ccr5;Cd83;Star;Inhba;Tmem100;Serpine2;Aspm;Ccr4;Igf1;Duoxa1;Gdnf;Serpinf1;Pf4;Efnb2;Sox9;Kdr;Cthrc1
GO:0015749	monosaccharide transport	9	92	0.20722	0.657141	291675;85497;25059;140868;301518;24778;24232;24890;24482	Mzb1;Klf15;Hk2;Fabp5;Prkag3;Slc2a1;C3;Esr1;Igf1
GO:0048646	anatomical structure formation involved in morphogenesis	61	784	0.207277	0.657141	289229;81819;170897;299210;311723;24832;293118;364754;497672;309760;24232;24493;81687;245920;367166;81651;24251;292406;29610;363265;24237;24451;81707;29393;25425;89804;63849;360243;58966;155430;311406;89824;25654;687536;362415;117029;25453;314818;29200;497979;292935;292301;24310;24770;24883;287562;84007;366126;29455;287526;29452;360918;306636;64536;140586;309523;114090;25589;282836;29437;25627	Vangl2;Pax8;Sphk1;Esrrb;Sox18;Thy1;Prcp;Fzd8;Brca1;Mypn;C3;Il1a;Mmp9;Cxcl10;Hyal1;Cspg4;Cd53;Thbs2;Tgfbr3;Col4a3;C6;Hmox1;Mmp14;Col1a1;Ctsh;Tek;Mmp8;Top2a;Ramp2;Hey2;Dusp2;Chi3l1;Col11a1;Foxf1;Ttll3;Ccr5;Gdnf;E2f7;Inhba;Tmem100;Htatip2;T;Ace;Ccl2;Wt1;Ccl12;C3ar1;Spi1;Gdf15;Serpinf1;Epas1;Pf4;Efnb2;Esm1;Sox9;Kif20b;Egr2;Kdr;Cthrc1;Acta1;Cma1
GO:0051235	maintenance of location	15	168	0.208099	0.659331	498638;25728;301086;282838;315298;311325;117029;311327;114482;25203;301701;25542;289054;24232;50665	Msr1;Apoe;Xcr1;Gm2a;Racgap1;Knstrn;Ccr5;Casc5;Nek2;Ccnb1;Ndc80;Ccl3;Aspm;C3;Tmsb10
GO:0006826	iron ion transport	5	44	0.209527	0.662155	170824;306009;29292;100360087;100362384	Steap3;Slc39a14;Ftl1;LOC100360087;LOC100362384
GO:0050805	negative regulation of synaptic transmission	5	44	0.209527	0.662155	29290;294043;50592;25553;25686	Adora1;Sorcs3;Gria1;Slc6a4;Gnai1
GO:0048286	lung alveolus development	5	44	0.209527	0.662155	25589;687536;25350;24482;24310	Kdr;Foxf1;Sftpd;Igf1;Ace
GO:0007193	adenylate cyclase-inhibiting G-protein coupled receptor signaling pathway	5	44	0.209527	0.662155	25339;29290;29235;25524;25083	Npr3;Adora1;Galr3;Psap;Adra2a
GO:0044703	multi-organism reproductive process	55	703	0.209649	0.662155	29597;25330;25154;289596;24834;56777;64557;60566;499204;83791;192129;24493;24890;304608;24571;81687;60582;170897;25553;286896;315298;25033;24770;24310;360711;291145;58966;691857;500987;291597;116510;24807;24883;29200;299106;84397;29366;289054;29221;24482;113976;83620;83928;50672;292206;79242;25083;24464;140586;29143;50665;292301;25425;50692;25203	P2ry2;Lipe;Pgr;Corin;Tk1;Adam1a;Bard1;Syt8;Ddias;Fdps;Vmp1;Il1a;Esr1;Mmp19;Muc1;Mmp9;Il1rn;Sphk1;Slc6a4;Sgpl1;Racgap1;Sstr1;Ccl2;Ace;RGD1310335;Hist1h1a;Ramp2;Pygo1;H2afx;Trim36;Timp1;Tacr1;Wt1;Inhba;Rpl10l;Tnfaip6;Serpine2;Aspm;Arg1;Igf1;Acsl4;Cit;Fetub;Ednrb;Trip13;Hpgd;Adra2a;Hp;Sox9;Grn;Tmsb10;T;Ctsh;Plaur;Ccnb1
GO:0043271	negative regulation of ion transport	8	80	0.209841	0.662343	60582;25728;314847;29366;29290;25569;113976;24310	Il1rn;Apoe;Best3;Serpine2;Adora1;Trh;Acsl4;Ace
GO:0045088	regulation of innate immune response	12	130	0.210077	0.662672	64546;501854;361689;56822;100911545;305355;291100;58949;295703;84387;499926;498840	Il12b;Rab7b;Unc93b1;Cd86;LOC100911545;Tlr10;Irf4;Ptafr;Serping1;Pglyrp1;Bpifb1;Tmem173
GO:0043408	regulation of MAPK cascade	36	446	0.210639	0.663685	25524;25728;290326;25054;24498;364754;25542;24232;24493;24890;117038;310621;60582;83504;306811;292699;29290;89804;117558;311406;89824;113959;289747;25589;301227;24482;117254;691993;289229;679975;24366;24367;25083;81639;81651;303886	Psap;Apoe;Pbk;Ntrk2;Il6;Fzd8;Ccl3;C3;Il1a;Esr1;Mt3;Iqgap3;Il1rn;Kl;Wnk2;Cblc;Adora1;Tek;Mylk2;Dusp2;Chi3l1;C5ar1;Osm;Kdr;Trem2;Igf1;Prdx1;Scimp;Vangl2;Gpr183;Fgb;Fgg;Adra2a;Alox15;Cspg4;Muc20
GO:0006937	regulation of muscle contraction	10	105	0.211503	0.663685	170897;29571;117558;24807;25083;24212;315611;25349;83731;29290	Sphk1;Scn10a;Mylk2;Tacr1;Adra2a;Atp1a2;Scn4b;Scn2b;Kcnma1;Adora1
GO:0003158	endothelium development	7	68	0.211583	0.663685	24392;155430;497979;81743;311723;25589;64057	Gja1;Hey2;Tmem100;Pde2a;Sox18;Kdr;Hapln2
GO:0043473	pigmentation	7	68	0.211583	0.663685	365042;50672;24787;29186;266714;25017;501162	Rab32;Ednrb;Sod2;Cd63;Myo7a;Myo5a;Mreg
GO:0006816	calcium ion transport	23	273	0.211607	0.663685	25334;24832;25316;29599;116637;25542;25017;24310;245920;24392;29465;79129;81869;24770;83567;305236;58966;191573;117029;24482;287562;301086;83781	Bhlha15;Thy1;Ms4a2;Atp2b3;Ccl4;Ccl3;Myo5a;Ace;Cxcl10;Gja1;Trpv2;Cyba;Gstm7;Ccl2;Mchr1;Cxcl11;Ramp2;Grin3a;Ccr5;Igf1;Ccl12;Xcr1;Lgals3
GO:0035383	thioester metabolic process	6	56	0.211851	0.663685	81726;311569;50671;89813;50559;361993	Mvd;Acss2;Fasn;Pdk4;Acot1;Them5
GO:0006637	acyl-CoA metabolic process	6	56	0.211851	0.663685	81726;311569;50671;89813;50559;361993	Mvd;Acss2;Fasn;Pdk4;Acot1;Them5
GO:0043534	blood vessel endothelial cell migration	6	56	0.211851	0.663685	25728;293118;306636;117029;311723;25589	Apoe;Prcp;Efnb2;Ccr5;Sox18;Kdr
GO:0045446	endothelial cell differentiation	6	56	0.211851	0.663685	155430;497979;81743;311723;25589;64057	Hey2;Tmem100;Pde2a;Sox18;Kdr;Hapln2
GO:0007200	phospholipase C-activating G-protein coupled receptor signaling pathway	6	56	0.211851	0.663685	29597;50672;89788;25339;25083;24890	P2ry2;Ednrb;Gna15;Npr3;Adra2a;Esr1
GO:0048644	muscle organ morphogenesis	6	56	0.211851	0.663685	155430;311167;84032;117558;29610;25654	Hey2;Smtnl1;Col3a1;Mylk2;Tgfbr3;Col11a1
GO:0010948	negative regulation of cell cycle process	14	156	0.213152	0.667345	360243;304477;296137;54237;298884;289747;315852;363227;314818;117524;25203;308768;24571;25515	Top2a;Kntc1;Bub1;Cdk1;Gen1;Osm;Ttk;Nabp1;E2f7;Ccnf;Ccnb1;Ticrr;Muc1;Plk1
GO:1902105	regulation of leukocyte differentiation	15	169	0.213959	0.669455	64546;24498;353218;362634;314386;191575;25704;361226;362076;361537;84387;297077;25542;360918;171411	Il12b;Il6;Tnfsf9;C1qc;Gpr68;Nme1;Il2ra;Cd83;Il36b;Tyrobp;Pglyrp1;Tmem176a;Ccl3;Pf4;Tmem176b
GO:0019216	regulation of lipid metabolic process	19	221	0.214179	0.669726	24482;89804;25524;83516;25728;89813;353250;25083;25557;497672;64191;83791;83731;245977;29290;24232;24493;24890;25427	Igf1;Tek;Psap;Ppargc1a;Apoe;Pdk4;Niacr1;Adra2a;Star;Brca1;Dhcr7;Fdps;Kcnma1;Gpr116;Adora1;C3;Il1a;Esr1;Cyp51
GO:0045840	positive regulation of mitosis	4	33	0.216028	0.671745	311336;24493;24482;25515	Nusap1;Il1a;Igf1;Plk1
GO:1903523	negative regulation of blood circulation	4	33	0.216028	0.671745	24212;29290;58812;311167	Atp1a2;Adora1;Apln;Smtnl1
GO:0006024	glycosaminoglycan biosynthetic process	4	33	0.216028	0.671745	367166;307859;25694;24482	Hyal1;Chst5;Has2;Igf1
GO:0050982	detection of mechanical stimulus	4	33	0.216028	0.671745	25364;24482;25654;29366	Asic2;Igf1;Col11a1;Serpine2
GO:0032652	regulation of interleukin-1 production	4	33	0.216028	0.671745	25732;170897;117029;25542	Acp5;Sphk1;Ccr5;Ccl3
GO:0009132	nucleoside diphosphate metabolic process	4	33	0.216028	0.671745	362720;316077;100359539;191575	Rrm2;Entpd3;LOC100359539;Nme1
GO:0007019	microtubule depolymerization	4	33	0.216028	0.671745	306575;84510;25203;171529	Ckap2;Stmn2;Ccnb1;Kif2c
GO:0031103	axon regeneration	4	33	0.216028	0.671745	114122;116640;25728;50568	Vcan;Tnc;Apoe;Cspg5
GO:0045980	negative regulation of nucleotide metabolic process	4	33	0.216028	0.671745	29235;25339;81743;25083	Galr3;Npr3;Pde2a;Adra2a
[truncated: 3,409 more rows]
